# Supplementary material for: Enantioselective [3 + 2] annulation of 3-hydroxymaleimides with quinone monoimines
Source: Royal Society of Chemistry journal article supplement (doi:10.1039/d1qo00128k), 2021-01-01
Supplement: d1qo00128k1.pdf [file d1qo00128k1.pdf]

## 1. General remarks

Chemicals were purchased from commercial suppliers and used without further purification unless otherwise stated. Solvents were dried and purified according to the standard procedures before use. Reactions were monitored by TLC. Flash column chromatography was performed on silica gels (200-300 mesh).  $^1\text{H}$  NMR and  $^{13}\text{C}$  NMR (300 and 75 MHz, respectively) spectra were recorded on a Bruker 300 MHz NMR spectrometer in  $\text{CDCl}_3$  or  $\text{DMSO-}d_6$ .  $^1\text{H}$  NMR chemical shifts are reported in ppm ( $\delta$ ) relative to tetramethylsilane (TMS) with the solvent resonance employed as the internal standard ( $\text{CDCl}_3$ ,  $\delta$  7.26 ppm,  $\text{DMSO-}d_6$  at 2.50 ppm,  $\text{Acetone-}d_6$  at 2.05 ppm). Data are reported as follows: chemical shift, multiplicity (s = singlet, brs = broad singlet, d = doublet, t = triplet, td = triplet of doublets, q = quartet, m = multiplet), coupling constants (Hz) and integration.  $^{13}\text{C}$  NMR chemical shifts are reported in ppm from tetramethylsilane (TMS) with the solvent resonance as the internal standard ( $\text{CDCl}_3$ ,  $\delta$  77.16 ppm,  $\text{DMSO-}d_6$  at 39.52 ppm,  $\text{Acetone-}d_6$  at 29.84 ppm). HRMS data were obtained on a Bruker Daltonics. Inc mass instrument (ESI). Optical rotations were measured on a Perkin-Elmer 241 Polarimeter. Melting points were recorded on a Buchi Melting Point B-545. Chiral phosphoric acids were purchased from commercial suppliers.

## 2. Preparation of hydroxymaleimides 1:

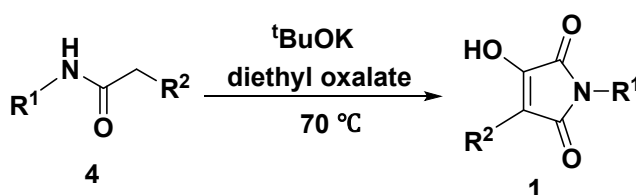

Hydroxymaleimide **1** was prepared according to literature<sup>1</sup> or as following procedure **A**: amide **4** (10 mmol) was dissolved in 15 mL of diethyl oxalate,  $^t\text{BuOK}$  (2.8 g, 25 mmol, 2.5 equiv.) was added to the mixture, then the solution was warmed to  $70\text{ }^\circ\text{C}$ . If necessary for stirring, minimal amounts of dry THF can be add to the solution. The reaction was monitored by TLC, after the reaction was completed,  $\text{HCl}$  (6N) was added to the mixture to  $\text{pH}\approx 3$  and diluted with DCM ( $3\times 50\text{ mL}$ ), the combined organic layer was washed with water, brine, dried over anhydrous  $\text{Na}_2\text{SO}_4$  and the solvent was removed in vacuo. The residue was subjected to a column chromatography (silica gel) to give the crude hydroxymaleimide. Then

the crude product was recrystallized from ethyl acetate and petroleum ether to afford pure hydroxymaleimide **1**. If the amide can't react completely, resulting amide and hydroxymaleimide always flowed simultaneously during column chromatography, hence triethylamine can be added to alkalize the column to remove amide compound, then a small amount of acetic acid was added to the eluent to acidize the column to separate hydroxymaleimide **1**.

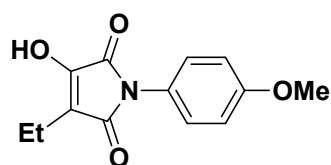

**3-Ethyl-4-hydroxy-1-(4-methoxyphenyl)-1H-pyrrole-2,5-**

**dione (1a):** Obtained according to literature<sup>1</sup>, yellow solid, <10% yield (286.6 mg). <sup>1</sup>H NMR (300 MHz, DMSO-*d*<sub>6</sub>)  $\delta$  12.02 (brs, 1H), 7.25-7.17 (m, 2H), 7.03-6.95 (m, 2H), 3.78 (s, 3H), 2.28 (q, *J* = 7.5 Hz, 2H), 1.07 (t, *J* = 7.5 Hz, 3H).

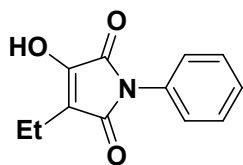

**3-Ethyl-4-hydroxy-1-phenyl-1H-pyrrole-2,5-dione (1b):**

Obtained according to literature<sup>1</sup>, yellow solid, <10% yield (237 mg). <sup>1</sup>H NMR (300 MHz, DMSO-*d*<sub>6</sub>)  $\delta$  12.10 (brs, 1H), 7.51-7.40 (m, 2H), 7.40-7.28 (m, 3H), 2.30 (q, *J* = 7.5 Hz, 2H), 1.08 (t, *J* = 7.5 Hz, 3H).

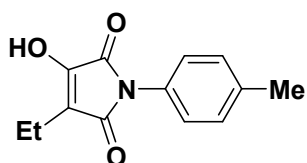

**3-Ethyl-4-hydroxy-1-(p-tolyl)-1H-pyrrole-2,5-dione (1c):**

Obtained according to literature<sup>1</sup>, yellow solid, <10% yield (168.0 mg). <sup>1</sup>H NMR (300 MHz, DMSO-*d*<sub>6</sub>)  $\delta$  12.04 (brs, 1H), 7.25 (d, *J* = 8.2 Hz, 2H), 7.22-7.15 (m, 2H), 2.33 (s, 3H), 2.27 (q, *J* = 7.5 Hz, 2H), 1.07 (t, *J* = 7.5 Hz, 3H).

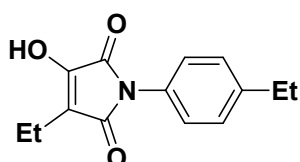

**3-Ethyl-1-(4-ethylphenyl)-4-hydroxy-1H-pyrrole-2,5-dione (1d):**

Obtained according to literature, yellow solid, 15% yield (734 mg), m.p.: 139.1-139.7 °C. <sup>1</sup>H NMR (300 MHz, DMSO-*d*<sub>6</sub>)  $\delta$  12.04 (brs, 1H), 7.28 (d, *J* = 8.4 Hz, 2H), 7.21 (d, *J* = 8.4 Hz, 2H), 2.63 (q, *J* = 7.6 Hz, 2H), 2.29 (q, *J* = 7.5 Hz, 2H), 1.19 (t, *J* = 7.6 Hz, 3H), 1.07 (t, *J* = 7.5 Hz, 3H). <sup>13</sup>C NMR (75 MHz, DMSO-*d*<sub>6</sub>)  $\delta$  171.07, 166.18, 152.47, 143.02, 129.38, 128.09, 126.52, 111.14, 27.81, 15.58, 14.23, 12.55.

HRMS (ESI) Calcd. for  $[C_{14}H_{15}NO_3+Na]^+$  268.0944; Found: 268.0942.

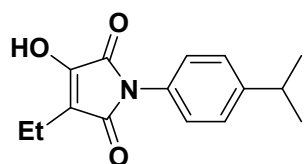

**3-Ethyl-4-hydroxy-1-(4-isopropylphenyl)-1H-pyrrole-2,5-dione**

**(1e):** Obtained according to literature<sup>1</sup>, yellow solid, 20% yield (1.013g), m.p.: 190.1-190.3 °C. <sup>1</sup>H NMR (300 MHz, DMSO-*d*<sub>6</sub>)  $\delta$

12.07 (brs, 1H), 7.32 (d,  $J = 8.4$  Hz, 2H), 7.21 (d,  $J = 8.3$  Hz, 2H), 2.92 (dt,  $J = 13.8, 6.9$  Hz, 1H), 2.29 (q,  $J = 7.5$  Hz, 2H), 1.21 (d,  $J = 6.9$  Hz, 6H), 1.07 (t,  $J = 7.5$  Hz, 3H). <sup>13</sup>C NMR (75 MHz, DMSO-*d*<sub>6</sub>)  $\delta$  171.06, 166.18, 152.47, 147.57, 129.44, 126.62, 126.52, 111.11, 33.14, 23.81, 14.22, 12.54. HRMS (ESI) Calcd. for  $[C_{15}H_{17}NO_3+Na]^+$  282.1101; Found: 282.1098.

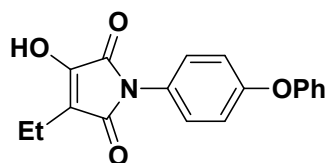

**3-Ethyl-4-hydroxy-1-(4-phenoxyphenyl)-1H-pyrrole-2,5-dione**

**(1f):** Obtained according to literature<sup>1</sup>, yellow solid, 16% yield (986 mg), m.p.: 188.7-189.1 °C. <sup>1</sup>H NMR (300 MHz, DMSO-*d*<sub>6</sub>)  $\delta$

12.13 (brs, 1H), 7.48-7.37 (m, 2H), 7.37-7.28 (m, 2H), 7.17 (t,  $J = 7.4$  Hz, 1H), 7.12-7.01 (m, 4H), 2.29 (q,  $J = 7.5$  Hz, 2H), 1.07 (t,  $J = 7.5$  Hz, 3H). <sup>13</sup>C NMR (75 MHz, DMSO-*d*<sub>6</sub>)  $\delta$  171.01, 166.13, 156.31, 155.74, 152.53, 130.15, 128.34, 126.89, 123.83, 118.96, 118.53, 111.15, 14.23, 12.54. HRMS (ESI) Calcd. for  $[C_{18}H_{15}NO_4+Na]^+$  332.0893; Found: 332.0891.

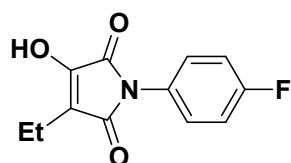

**3-Ethyl-1-(4-fluorophenyl)-4-hydroxy-1H-pyrrole-2,5-dione (1g):**

Obtained according to literature<sup>1</sup>, yellow solid, <10% yield (373 mg).

<sup>1</sup>H NMR (300 MHz, DMSO-*d*<sub>6</sub>)  $\delta$  12.10 (brs, 1H), 7.37 (m, 2H), 7.30 (m, 2H), 2.29 (q,  $J = 7.5$  Hz, 2H), 1.08 (t,  $J = 7.5$  Hz, 3H).

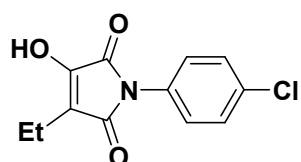

**1-(4-Chlorophenyl)-3-ethyl-4-hydroxy-1H-pyrrole-2,5-dione (1h):**

Obtained according to procedure A, yellow solid, 48% yield (2.422 g). <sup>1</sup>H NMR (300 MHz, DMSO-*d*<sub>6</sub>)  $\delta$  12.33 (brs, 1H), 7.52 (d,  $J =$

8.7 Hz, 2H), 7.37 (d,  $J = 8.8$  Hz, 2H), 2.29 (q,  $J = 7.5$  Hz, 2H), 1.07 (t,  $J = 7.5$  Hz, 3H).

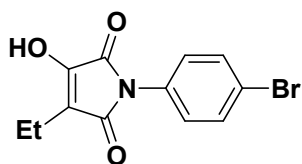

**1-(4-Bromophenyl)-3-ethyl-4-hydroxy-1H-pyrrole-2,5-dione (1i):**

Obtained according to literature<sup>1</sup>, yellow solid, <10% yield (238 mg).

<sup>1</sup>H NMR (300 MHz, DMSO-*d*<sub>6</sub>)  $\delta$  12.16 (brs, 1H), 7.66 (d, *J* = 8.7 Hz, 2H), 7.31 (d, *J* = 8.7 Hz, 2H), 2.29 (q, *J* = 7.5 Hz, 2H), 1.07 (t, *J*

= 7.5 Hz, 3H).

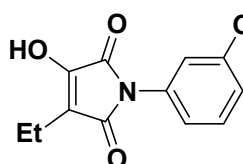

**3-Ethyl-4-hydroxy-1-(3-methoxyphenyl)-1H-pyrrole-2,5-dione**

**(1j):** Obtained according to literature<sup>1</sup>, yellow solid, 20% yield (997

mg). <sup>1</sup>H NMR (300 MHz, DMSO-*d*<sub>6</sub>)  $\delta$  12.02 (brs, 1H), 7.36 (dd, *J* =

11.7, 4.7 Hz, 1H), 6.98-6.85 (m, 3H), 3.76 (s, 3H), 2.29 (q, *J* = 7.6 Hz, 2H), 1.07 (t, *J* = 7.5 Hz, 3H).

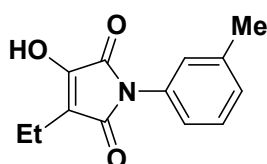

**3-Ethyl-4-hydroxy-1-(m-tolyl)-1H-pyrrole-2,5-dione (1k):** Obtained

according to literature<sup>1</sup>, yellow solid, <10% yield (305 mg). <sup>1</sup>H NMR

(300 MHz, DMSO-*d*<sub>6</sub>)  $\delta$  12.10 (brs, 1H), 7.33 (t, *J* = 7.7 Hz, 1H), 7.17

(d, *J* = 7.6 Hz, 1H), 7.10 (dd, *J* = 10.0, 1.1 Hz, 2H), 2.33 (s, 3H), 2.28 (q, *J* = 7.5 Hz, 2H), 1.07 (t, *J* = 7.5 Hz, 3H).

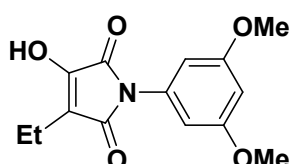

**1-(3,5-Dimethoxyphenyl)-3-ethyl-4-hydroxy-1H-pyrrole-2,5-**

**dione (1l):** Obtained according to procedure A, yellow solid, 57%

yield (3.152 g), m.p.: 127.1-127.5 °C. <sup>1</sup>H NMR (300 MHz, DMSO-*d*<sub>6</sub>)

$\delta$  12.10 (brs, 1H), 6.51 (s, 3H), 3.74 (s, 6H), 2.29 (q, *J* = 7.5 Hz, 2H), 1.07 (t, *J* = 7.5 Hz, 3H).

<sup>13</sup>C NMR (75 MHz, DMSO-*d*<sub>6</sub>)  $\delta$  170.75, 165.89, 160.30, 152.47, 133.41, 111.23, 105.06,

99.20, 55.39, 14.22, 12.50. HRMS (ESI) Calcd. for [C<sub>14</sub>H<sub>15</sub>NO<sub>5</sub>+Na]<sup>+</sup> 300.0842; Found:

300.0835.

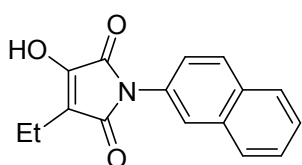

**3-Ethyl-4-hydroxy-1-(naphthalen-1-yl)-1H-pyrrole-2,5-dione**

**(1m):** Yellow solid, M. P.: 183.0-183.3 °C, 27% yield (722.3 mg),

<sup>1</sup>H NMR (300 MHz, DMSO-*d*<sub>6</sub>)  $\delta$  12.18 (brs, 1H), 7.99 (d, *J* = 9.1

Hz, 1H), 7.97-7.91 (m, 2H), 7.89 (d, *J* = 1.7 Hz, 1H), 7.60-7.52 (m, 2H), 7.48 (dd, *J* = 8.7, 2.0



Hz, 1H), 2.34 (q,  $J = 7.5$  Hz, 2H), 1.11 (t,  $J = 7.5$  Hz, 3H).  $^{13}\text{C}$  NMR (75 MHz,  $\text{DMSO-}d_6$ )  $\delta$  171.06, 166.19, 152.66, 132.75, 131.67, 129.36, 128.36, 127.78, 127.60, 126.58, 126.42, 124.80, 124.74, 111.31, 14.29, 12.57. HRMS (ESI) Calcd. for  $[\text{C}_{16}\text{H}_{13}\text{NO}_3+\text{Na}]^+$  290.0788; Found: 290.0802.

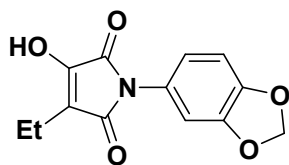

**1-(Benzo[d][1,3]dioxol-5-yl)-3-ethyl-4-hydroxy-1H-pyrrole-2,5-**

**dione (1n):** Obtained according to procedure A, yellow solid, 36% yield (1.886 g), m.p.: 124.1-124.5 °C.  $^1\text{H}$  NMR (300 MHz,  $\text{DMSO-}d_6$ )

$\delta$  12.13 (brs, 1H), 6.97 (d,  $J = 8.3$  Hz, 1H), 6.89 (d,  $J = 1.9$  Hz, 1H), 6.76 (dd,  $J = 8.2, 2.0$  Hz, 1H), 6.06 (s, 2H), 2.28 (q,  $J = 7.5$  Hz, 2H), 1.07 (t,  $J = 7.5$  Hz, 3H).  $^{13}\text{C}$  NMR (75 MHz,  $\text{DMSO-}d_6$ )  $\delta$  171.06, 166.19, 152.43, 147.24, 146.47, 125.30, 120.64, 111.09, 108.17, 107.95, 101.60, 14.21, 12.52. HRMS (ESI) Calcd. for  $[\text{C}_{13}\text{H}_{11}\text{NO}_5+\text{Na}]^+$  284.0529; Found: 284.0528.

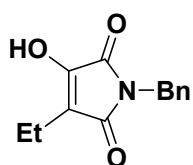

**1-Benzyl-3-ethyl-4-hydroxy-1H-pyrrole-2,5-dione (1o):** Obtained

according to procedure A, white solid, 27% yield (624 mg), m.p.:

75.1-75.7 °C.  $^1\text{H}$  NMR (300 MHz,  $\text{DMSO-}d_6$ )  $\delta$  11.98 (brs, 1H), 7.37-7.16

(m, 5H), 4.54 (s, 2H), 2.23 (q,  $J = 7.5$  Hz, 2H), 1.02 (t,  $J = 7.5$  Hz, 3H).  $^{13}\text{C}$  NMR (75 MHz,  $\text{DMSO-}d_6$ )  $\delta$  171.83, 167.03, 152.45, 137.17, 128.55, 127.27, 127.16, 111.27, 40.24, 14.12, 12.60. HRMS (ESI) Calcd. for  $[\text{C}_{13}\text{H}_{13}\text{NO}_3+\text{H}]^+$  232.0968; Found: 232.0967.

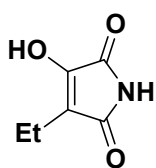

**3-Ethyl-4-hydroxy-1H-pyrrole-2,5-dione (1p):** Obtained according to

procedure A, white solid, 69% yield (985.8 mg).  $^1\text{H}$  NMR (300 MHz,

$\text{DMSO-}d_6$ )  $\delta$  11.57 (brs, 1H), 10.27 (brs, 1H), 2.17 (q,  $J = 7.5$  Hz, 2H), 1.00 (t,

$J = 7.5$  Hz, 3H).

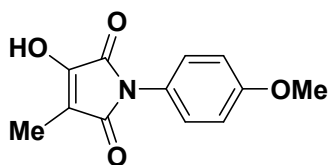

**3-Hydroxy-1-(4-methoxyphenyl)-4-methyl-1H-pyrrole-2,5-**

**dione (1q):** Obtained according to literature<sup>1</sup>, orange solid, 22%

yield (1.026 g), m.p.: 173.7-174.3 °C.  $^1\text{H}$  NMR (300 MHz,

$\text{DMSO-}d_6$ )  $\delta$  11.99 (brs, 1H), 7.25-7.16 (m, 2H), 7.04-6.95 (m, 2H), 3.77 (s, 3H), 1.79 (s, 3H).

$^{13}\text{C}$  NMR (75 MHz, DMSO- $d_6$ )  $\delta$  171.55, 166.26, 158.33, 152.77, 128.09, 124.41, 114.04, 105.76, 55.33, 5.90. HRMS (ESI) Calcd. for  $[\text{C}_{12}\text{H}_{11}\text{NO}_4+\text{Na}]^+$  256.0580; Found: 256.0577.

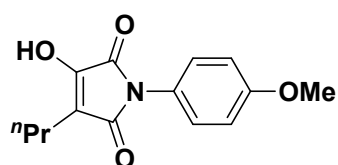

**3-Hydroxy-1-(4-methoxyphenyl)-4-propyl-1H-pyrrole-2,5-dione (1r):** Obtained according to literature<sup>1</sup>, yellow solid, 20% yield (1.060 g), m.p.: 121.1-122.3 °C.  $^1\text{H}$  NMR (300 MHz, DMSO- $d_6$ )  $\delta$  11.93 (s, 1H), 7.26- 7.16 (m, 2H), 7.04-6.95 (m, 2H), 3.77 (s, 3H), 2.25 (t,  $J$  = 7.4 Hz, 2H), 1.60-1.41 (m, 2H), 0.90 (t,  $J$  = 7.3 Hz, 3H).  $^{13}\text{C}$  NMR (75 MHz, DMSO- $d_6$ )  $\delta$  171.36, 166.28, 158.31, 153.05, 128.08, 124.40, 114.02, 109.57, 55.32, 22.67, 20.94, 13.76. HRMS (ESI) Calcd. for  $[\text{C}_{14}\text{H}_{15}\text{NO}_4+\text{Na}]^+$  284.0893; Found: 284.0893.

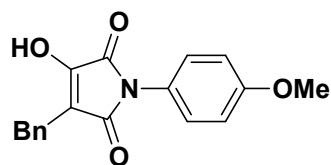

**3-Benzyl-4-hydroxy-1-(4-methoxyphenyl)-1H-pyrrole-2,5-dione (1s):** Obtained according to literature<sup>1</sup>, yellow solid, 17% yield (1.062 g), m.p.: 171.8-172.2 °C.  $^1\text{H}$  NMR (300 MHz, DMSO- $d_6$ )  $\delta$  12.48 (brs, 1H), 7.35-7.13 (m, 7H), 6.99 (d,  $J$  = 9.0 Hz, 2H), 3.77 (s, 3H), 3.63 (s, 2H).  $^{13}\text{C}$  NMR (75 MHz, DMSO- $d_6$ )  $\delta$  171.14, 166.16, 158.36, 153.55, 138.59, 128.40, 128.31, 128.13, 126.14, 124.30, 114.03, 108.30, 55.32, 26.33. HRMS (ESI) Calcd. for  $[\text{C}_{18}\text{H}_{15}\text{NO}_4+\text{H}]^+$  310.1074; Found: 310.1087.

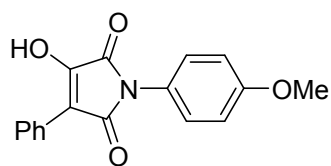

**3-Hydroxy-1-(4-methoxyphenyl)-4-phenyl-1H-pyrrole-2,5-dione (1t):**  $^1\text{H}$  NMR (300 MHz, DMSO- $d_6$ )  $\delta$  8.05-7.96 (m, 2H), 7.44 (t,  $J$  = 7.6 Hz, 2H), 7.36-7.26 (m, 3H), 7.04 (dd,  $J$  = 9.5, 2.5 Hz, 2H), 3.79 (s, 3H).

### 3. Preparation of quinone monoimines **2**:

Quinone monoimines **2** were obtained according to the literature procedures<sup>2</sup>.

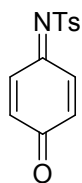

**4-Methyl-N-(4-oxocyclohexa-2,5-dien-1-ylidene)benzenesulfonamide (2a):**  $^1\text{H}$  NMR (300 MHz,  $\text{CDCl}_3$ )  $\delta$  8.22 (dd,  $J$  = 10.5, 2.5 Hz, 1H), 7.90 (d,  $J$  = 8.3 Hz, 2H), 7.38 (d,  $J$  = 8.1 Hz, 2H), 6.98 (dd,  $J$  = 10.2, 2.5 Hz, 1H), 6.69 (d,  $J$  = 10.3 Hz, 2H), 2.47 (s, 3H).

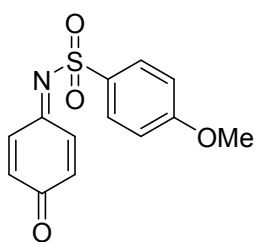

**4-Methoxy-*N*-(4-oxocyclohexa-2,5-dien-1-ylidene)benzenesulfonamide (2b):**  $^1\text{H NMR}$  (300 MHz,  $\text{DMSO-}d_6$ )  $\delta$  8.06 (dd,  $J = 10.3$ , 2.7 Hz, 1H), 8.01-7.79 (m, 2H), 7.29-7.18 (m, 2H), 7.13 (dd,  $J = 9.9$ , 2.7 Hz, 1H), 6.97-6.75 (m, 2H), 3.88 (s, 3H).

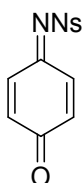

**4-Nitro-*N*-(4-oxocyclohexa-2,5-dien-1-ylidene)benzenesulfonamide (2c):**  $^1\text{H NMR}$  (300 MHz,  $\text{CDCl}_3$ )  $\delta$  8.43 (d,  $J = 8.8$  Hz, 2H), 8.22 (d,  $J = 8.8$  Hz, 2H), 8.12 (d,  $J = 10.3$  Hz, 1H), 6.99 (d,  $J = 10.0$  Hz, 1H), 6.75 (d,  $J = 10.1$  Hz, 2H).

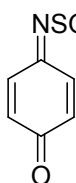

***N*-(4-oxocyclohexa-2,5-dien-1-ylidene)benzenesulfonamide (2d):**  $^1\text{H NMR}$  (300 MHz,  $\text{CDCl}_3$ )  $\delta$  8.21 (dd,  $J = 10.6$ , 2.4 Hz, 1H), 8.03 (dd,  $J = 8.4$ , 1.1 Hz, 2H), 7.73-7.64 (m, 1H), 7.64-7.55 (m, 2H), 6.99 (dd,  $J = 10.2$ , 2.5 Hz, 1H), 6.70 (d,  $J = 10.2$  Hz, 2H).

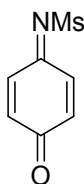

***N*-(4-oxocyclohexa-2,5-dien-1-ylidene)methanesulfonamide (2e) :**  $^1\text{H NMR}$  (300 MHz,  $\text{CDCl}_3$ )  $\delta$  7.96 (dd,  $J = 10.4$ , 2.6 Hz, 1H), 7.01 (dd,  $J = 10.1$ , 2.6 Hz, 1H), 6.73 (dd,  $J = 10.1$ , 2.1 Hz, 1H), 6.65 (dd,  $J = 10.4$ , 2.1 Hz, 1H), 3.28 (s, 3H).

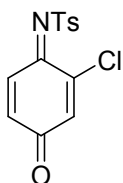

***N*-(2-chloro-4-oxocyclohexa-2,5-dien-1-ylidene)-4-methylbenzenesulfonamide (2f):**  $^1\text{H NMR}$  (300 MHz,  $\text{CDCl}_3$ )  $\delta$  8.45 (d,  $J = 2.5$  Hz, 0.5H), 8.25 (dd,  $J = 10.3$ , 2.4 Hz, 0.5H), 7.89 (dd,  $J = 8.3$ , 3.6 Hz, 2H), 7.39 (d,  $J = 8.1$  Hz, 2H), 7.18 (d,  $J = 2.4$  Hz, 0.4H), 6.99 (dd,  $J = 10.0$ , 2.5 Hz, 0.6H), 6.81 (dd,  $J = 10.1$ , 5.1 Hz, 1H), 2.47 (s, 3H).

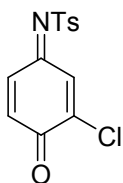

***N*-(3-chloro-4-oxocyclohexa-2,5-dien-1-ylidene)-4-methylbenzenesulfonamide (2g):**  $^1\text{H NMR}$  (300 MHz,  $\text{CDCl}_3$ )  $\delta$  8.45 (d,  $J = 2.5$  Hz, 0.6H), 8.24 (dd,  $J = 10.3$ , 2.5 Hz, 0.4H), 7.89 (dd,  $J = 8.3$ , 3.7 Hz, 2H), 7.39 (d,  $J = 7.8$  Hz, 2H), 7.18 (d,  $J = 2.4$  Hz, 0.4H), 6.99 (dd,  $J = 10.0$ , 2.5 Hz, 0.6H), 6.81 (dd,  $J = 10.2$ , 5.2 Hz, 1H), 2.47 (s, 3H).

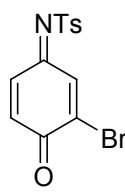
**N-(3-bromo-4-oxocyclohexa-2,5-dien-1-ylidene)-4-methylbenzenesulfonamide (2h):**  $^1\text{H}$  NMR (300 MHz,  $\text{CDCl}_3$ )  $\delta$  8.73 (d,  $J = 2.4$  Hz, 0.5H), 8.25 (dd,  $J = 10.2, 2.4$  Hz, 0.5H), 7.89 (dd,  $J = 8.3, 4.2$  Hz, 2H), 7.46 (d,  $J = 2.4$  Hz, 0.4H), 7.39 (d,  $J = 7.7$  Hz, 2H), 7.00 (dd,  $J = 10.0, 2.5$  Hz, 0.6H), 6.85 (dd,  $J = 10.1, 5.1$  Hz, 1H), 2.47 (s, 3H).

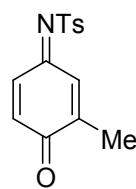
**4-methyl-N-(3-methyl-4-oxocyclohexa-2,5-dien-1-ylidene)benzenesulfonamide (2i):**  $^1\text{H}$  NMR (300 MHz,  $\text{CDCl}_3$ )  $\delta$  8.16 (dd,  $J = 10.3, 2.7$  Hz, 0.4H), 8.01 (dd,  $J = 2.5, 1.5$  Hz, 0.6 H), 7.89 (dd,  $J = 8.3, 1.7$  Hz, 2H), 7.37 (d,  $J = 8.3$  Hz, 2H), 6.90 (dd,  $J = 10.0, 2.6$  Hz, 0.6H), 6.80 (dd,  $J = 3.2, 2.2$  Hz, 0.4H), 6.67 (dd,  $J = 10.2, 2.5$  Hz, 1H), 2.46 (s, 3H), 2.14 (d,  $J = 1.5$  Hz, 2H), 2.05 (d,  $J = 1.3$  Hz, 1H).

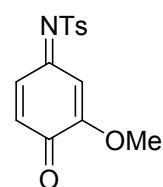
**N-(3-methoxy-4-oxocyclohexa-2,5-dien-1-ylidene)-4-methylbenzenesulfonamide (2j):** Yellow solid, M. P.: 161.2-161.7 °C, 24% yield (694.7 mg),  $^1\text{H}$  NMR (300 MHz,  $\text{CDCl}_3$ )  $\delta$  8.21 (d,  $J = 10.7$  Hz, 0.2H), 7.90 (d,  $J = 8.3$  Hz, 2H), 7.37 (d,  $J = 8.0$  Hz, 2H), 7.28 (d,  $J = 2.3$  Hz, 0.8H), 6.90 (dd,  $J = 9.9, 2.3$  Hz, 0.8H), 6.64 (dd,  $J = 10.3, 5.7$  Hz, 1H), 6.09 (d,  $J = 2.7$  Hz, 0.2H), 3.96 (s, 2.4H), 3.82 (s, 0.6H), 2.46 (s, 3H).  $^{13}\text{C}$  NMR (75 MHz,  $\text{CDCl}_3$ )  $\delta$  180.37, 179.95, 165.31, 164.71, 157.12, 156.97, 144.36, 141.25, 137.05, 133.66, 133.43, 130.10, 129.55, 127.22, 109.95, 101.70, 56.54, 56.21, 21.47. HRMS (ESI) Calcd for  $[\text{C}_{14}\text{H}_{13}\text{NO}_4\text{S}+\text{Na}]^+$  314.0457; Found: 314.0453.

#### 4. General procedure for the catalytic asymmetric [3+2] annulation of hydroxymaleimides **1** with quinone monoimines **2**:

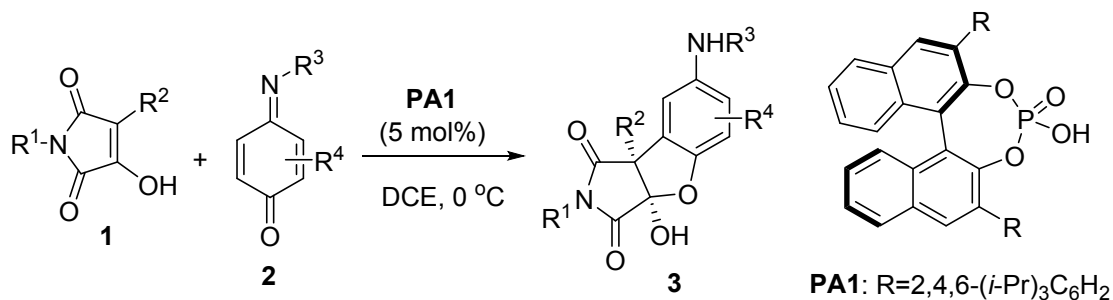

Hydroxymaleimide **1** (0.10 mmol), quinone monoimine **2** (0.12 mmol) and catalyst **PA1** (3.8 mg, 0.005 mmol, 5 mol %) were dissolved in 1,2-dichloroethane (1.0 mL) in a flame-dried vial equipped with a magnetic stirring bar. The reaction mixture was stirred at 0 °C until no starting material was detected by TLC. The mixture was subjected to chromatography (silica gel, petroleum ether/ethyl acetate: 3/1 to 2/1) to afford the desired product **3**.

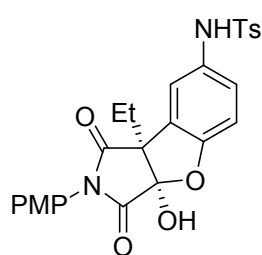

*N*-((3*aR*,8*bS*)-8*b*-ethyl-3*a*-hydroxy-2-(4-methoxyphenyl)-1,3-dioxo-2,3,3*a*,8*b*-tetrahydro-1*H*-benzofuro[2,3-*c*]pyrrol-7-yl)-4-methylbenzenesulfonamide (**3aa**): White solid, M.P.: 122.3-122.8 °C, >99% yield (53.6 mg), 99% ee. HPLC condition: Chiralpak AD-H (hexane/C<sub>2</sub>H<sub>5</sub>OH: 70/30, 1.0 mL/min, *t*<sub>major</sub> = 9.5 min, *t*<sub>minor</sub> = 19.8 min).

[ $\alpha$ ]<sub>D</sub><sup>20</sup> = -135.7 (C 1.0, EtOH). <sup>1</sup>H NMR (300 MHz, DMSO-*d*<sub>6</sub>)  $\delta$  9.94 (s, 1H), 9.14 (s, 1H), 7.54 (d, *J* = 8.3 Hz, 2H), 7.29 (d, *J* = 8.1 Hz, 2H), 7.12 (dd, *J* = 9.4, 2.5 Hz, 2H), 7.07-6.94 (m, 4H), 6.86 (dd, *J* = 7.7, 1.4 Hz, 1H), 3.77 (s, 3H), 2.29 (s, 3H), 2.15-1.88 (m, 2H), 0.85 (t, *J* = 7.3 Hz, 3H). <sup>13</sup>C NMR (75 MHz, DMSO-*d*<sub>6</sub>)  $\delta$  174.48, 171.13, 159.56, 153.59, 143.36, 136.18, 132.10, 129.62, 128.17, 126.89, 125.85, 124.61, 123.53, 118.81, 114.58, 110.61, 107.05, 59.03, 55.54, 23.37, 20.98, 9.06. HRMS (ESI) Calcd. for [C<sub>26</sub>H<sub>24</sub>N<sub>2</sub>O<sub>7</sub>S+Na]<sup>+</sup> 531.1196; Found: 531.1205.

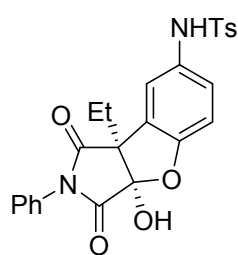

*N*-((3*aR*,8*bS*)-8*b*-ethyl-3*a*-hydroxy-1,3-dioxo-2-phenyl-2,3,3*a*,8*b*-tetrahydro-1*H*-benzofuro[2,3-*c*]pyrrol-7-yl)-4-methylbenzenesulfonamide (**3ba**): White solid, M.P.: 215.7-216.3 °C, >99% yield (53.9 mg), >99% ee. HPLC condition: Chiralpak AD-H (hexane/

C<sub>2</sub>H<sub>5</sub>OH: 70/30, 1.0 mL/min, *t*<sub>major</sub> = 12.7 min., *t*<sub>minor</sub> = 20.3 min.). [ $\alpha$ ]<sub>D</sub><sup>20</sup> = -125.6 (C 1.0, EtOH). <sup>1</sup>H NMR (300 MHz, DMSO-*d*<sub>6</sub>)  $\delta$  9.94 (s, 1H), 9.17 (s, 1H), 7.58-7.45 (m, 5H), 7.30 (d, *J* = 8.0 Hz, 2H), 7.22 (dd, *J* = 6.2, 1.7 Hz, 2H), 7.04-6.96 (m, 2H), 6.91-6.83 (m, 1H), 2.29 (s, 3H), 2.15-1.90 (m, 2H), 0.86 (t, *J* = 7.3 Hz, 3H). <sup>13</sup>C NMR (100 MHz, DMSO-*d*<sub>6</sub>)  $\delta$  174.64, 171.30, 153.96, 143.71, 136.55, 132.53, 131.46, 129.99, 129.77,

129.65, 127.29, 127.28, 126.16, 125.00, 119.16, 111.02, 107.47, 59.48, 23.75, 21.36, 9.44.  
HRMS (ESI) Calcd for  $[C_{25}H_{22}N_2O_6S+Na]^+$  501.1091; Found: 501.1083.

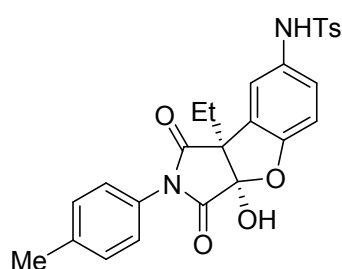

***N*-((3a*R*,8b*S*)-8b-ethyl-3a-hydroxy-1,3-dioxo-2-(*p*-tolyl)-2,3,3a,8b-tetrahydro-1*H*-benzofuro[2,3-*c*]pyrrol-7-yl)-4-methylbenzenesulfonamide (3ca):** White solid, M. P.: 213.8-214.2°C, 95% yield (46.8 mg), 98% ee. HPLC condition: Chiralpak AD-H (hexane/  $C_2H_5OH$ : 70/30, 1.0 mL/min,  $t_{major} = 12.6$  min,  $t_{minor} =$

23.6 min).  $[\alpha]_D^{20} = -108.5$  (C 1.0, EtOH).  $^1H$  NMR (300 MHz,  $DMSO-d_6$ )  $\delta$  9.94 (s, 1H), 9.15 (s, 1H), 7.54 (d,  $J = 8.2$  Hz, 2H), 7.29 (d,  $J = 7.9$  Hz, 4H), 7.07 (d,  $J = 8.2$  Hz, 2H), 7.04-6.95 (m, 2H), 6.90-6.83 (m, 1H), 2.33 (s, 3H), 2.29 (s, 3H), 2.17-1.88 (m, 2H), 0.86 (t,  $J = 7.3$  Hz, 3H).  $^{13}C$  NMR (75 MHz,  $DMSO-d_6$ )  $\delta$  174.31, 170.97, 153.53, 143.31, 138.94, 136.16, 132.09, 129.80, 129.58, 128.44, 126.86, 126.62, 125.79, 124.56, 118.74, 110.58, 107.03, 59.04, 23.33, 20.95, 20.75, 9.02. HRMS (ESI) Calcd for  $[C_{26}H_{24}N_2O_6S+Na]^+$  515.1247; Found: 515.1255.

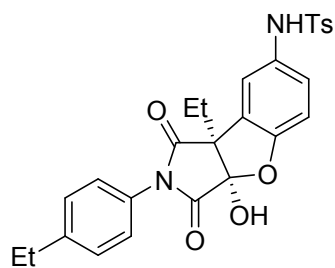

***N*-((3a*R*,8b*S*)-8b-ethyl-2-(4-ethylphenyl)-3a-hydroxy-1,3-dioxo-2,3,3a,8b-tetrahydro-1*H*-benzofuro[2,3-*c*]pyrrol-7-yl)-4-methylbenzenesulfonamide (3da):** White solid, M.P.: 116.5-117.0 °C, >99% yield (58.8 mg), 99% ee. HPLC condition: Chiralpak AD-H (hexane/  $C_2H_5OH$ : 70/30, 1.0 mL/min.,  $t_{major} =$

13.0 min.,  $t_{minor} = 22.4$  min.).  $[\alpha]_D^{20} = -129.2$  (C 1.0, EtOH).  $^1H$  NMR (300 MHz,  $DMSO-d_6$ )  $\delta$  9.94 (s, 1H), 9.16 (s, 1H), 7.54 (d,  $J = 8.2$  Hz, 2H), 7.31 (dd,  $J = 11.1, 8.4$  Hz, 4H), 7.10 (d,  $J = 8.4$  Hz, 2H), 7.04-6.94 (m, 2H), 6.86 (dd,  $J = 7.7, 1.4$  Hz, 1H), 2.63 (q,  $J = 7.6$  Hz, 2H), 2.28 (s, 3H), 2.13-1.91 (m, 2H), 1.17 (t,  $J = 7.6$  Hz, 3H), 0.86 (t,  $J = 7.3$  Hz, 3H).  $^{13}C$  NMR (75 MHz,  $DMSO-d_6$ )  $\delta$  174.29, 170.96, 153.52, 145.06, 143.27, 136.18, 132.08, 129.54, 128.62, 126.83, 126.66, 125.79, 124.58, 118.77, 110.54, 107.02, 59.03, 27.83, 23.31, 20.91, 15.39, 8.98. HRMS (ESI) Calcd for  $[C_{27}H_{26}N_2O_6S+Na]^+$  529.1404; Found: 529.1379.

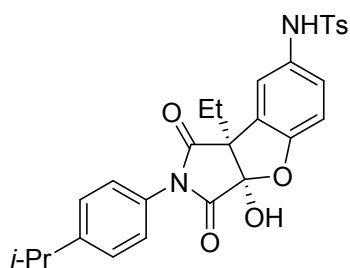

***N*-((3*aR*,8*bS*)-8*b*-ethyl-3*a*-hydroxy-2-(4-isopropyl-phenyl)-1,3-dioxo-2,3,3*a*,8*b*-tetrahydro-1*H*-benzofuro[2,3-*c*]pyrrol-7-yl)-4-methylbenzenesulfonamide (3ea):** White solid, M.P.: 230.5-231.0 °C, >99% yield (58.5 mg), 97% ee. HPLC condition: Chiralpak AD-H (hexane/ C<sub>2</sub>H<sub>5</sub>OH: 70/30, 1.0 mL/min., *t*<sub>major</sub> = 10.6 min., *t*<sub>minor</sub> = 13.7 min.). [ $\alpha$ ]<sub>D</sub><sup>20</sup> = -134.9 (C 1.0, EtOH). <sup>1</sup>H NMR (300 MHz, DMSO-*d*<sub>6</sub>)  $\delta$  9.93 (s, 1H), 9.14 (s, 1H), 7.53 (d, *J* = 8.2 Hz, 2H), 7.37 (d, *J* = 8.3 Hz, 2H), 7.29 (d, *J* = 8.2 Hz, 2H), 7.12 (d, *J* = 8.3 Hz, 2H), 7.04-6.95 (m, 2H), 6.91-6.82 (m, 1H), 3.00-2.87 (m, 1H), 2.29 (s, 3H), 2.15-1.88 (m, 2H), 1.21 (d, *J* = 6.9 Hz, 6H), 0.86 (t, *J* = 7.2 Hz, 3H). <sup>13</sup>C NMR (75 MHz, DMSO-*d*<sub>6</sub>)  $\delta$  174.19, 170.89, 153.44, 149.48, 143.14, 136.14, 132.02, 129.45, 128.64, 127.08, 126.75, 126.59, 125.72, 124.49, 118.69, 110.45, 106.95, 58.95, 33.12, 23.63, 23.24, 20.83, 8.90. HRMS (ESI) Calcd for [C<sub>28</sub>H<sub>28</sub>N<sub>2</sub>O<sub>6</sub>S+Na]<sup>+</sup> 543.1560; Found: 543.1538.

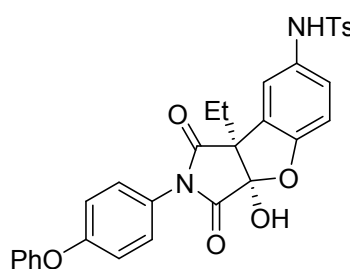

***N*-((3*aR*,8*bS*)-8*b*-ethyl-3*a*-hydroxy-1,3-dioxo-2-(4-phenoxy-phenyl)-2,3,3*a*,8*b*-tetrahydro-1*H*-benzofuro[2,3-*c*]pyrrol-7-yl)-4-methylbenzenesulfonamide (3fa):** White solid, M. P.: 116.8-117.6 °C, 87% yield (49.6 mg), 82% ee. HPLC condition: Chiralpak AD-H (hexane/ C<sub>2</sub>H<sub>5</sub>OH: 70/30, 1.0 mL/min., *t*<sub>major</sub> = 14.6 min., *t*<sub>minor</sub> = 28.1 min.). [ $\alpha$ ]<sub>D</sub><sup>20</sup> = -101.8 (C 1.0, EtOH). <sup>1</sup>H NMR (300 MHz, DMSO-*d*<sub>6</sub>)  $\delta$  9.96 (s, 1H), 9.18 (s, 1H), 7.55 (d, *J* = 8.2 Hz, 2H), 7.42 (t, *J* = 7.6 Hz, 2H), 7.29 (d, *J* = 8.2 Hz, 2H), 7.26-7.15 (m, 3H), 7.12-7.08 (m, 2H), 7.06 (d, *J* = 1.1 Hz, 2H), 7.04-6.98 (m, 2H), 6.90-6.84 (m, 1H), 2.28 (s, 3H), 2.18-1.90 (m, 2H), 0.86 (t, *J* = 7.3 Hz, 3H). <sup>13</sup>C NMR (100 MHz, DMSO-*d*<sub>6</sub>)  $\delta$  174.72, 171.37, 157.86, 156.15, 153.96, 143.72, 136.54, 132.51, 130.74, 129.99, 129.09, 127.27, 126.14, 125.01, 124.79, 119.94, 119.19, 118.90, 111.01, 107.43, 59.44, 23.74, 21.35, 9.43. HRMS (ESI) Calcd for [C<sub>31</sub>H<sub>26</sub>N<sub>2</sub>O<sub>7</sub>S+Na]<sup>+</sup> 593.1353; Found: 593.1332.

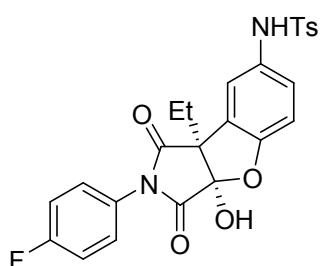

***N*-((3*aR*,8*bS*)-8*b*-ethyl-2-(4-fluorophenyl)-3*a*-hydroxy-1,3-dioxo-2,3,3*a*,8*b*-tetrahydro-1*H*-benzofuro[2,3-*c*]pyrrol-7-yl)-4-methylbenzenesulfonamide (3ga):** White solid, M. P.: 213.1-213.8 °C, >99% yield (54.0 mg), 99% ee. HPLC condition:

Chiralpak AD-H (hexane/ C<sub>2</sub>H<sub>5</sub>OH: 70/30, 1.0 mL/min.,  $t_{\text{major}} = 9.5$  min.,  $t_{\text{minor}} = 16.2$  min.).  $[\alpha]_{\text{D}}^{20} = -128.9$  (C 1.0, EtOH). <sup>1</sup>H NMR (300 MHz, DMSO-*d*<sub>6</sub>)  $\delta$  9.94 (s, 1H), 9.19 (s, 1H), 7.53 (d,  $J = 8.2$  Hz, 2H), 7.38-7.27 (m, 6H), 7.04-6.95 (m, 2H), 6.86 (d,  $J = 8.3$  Hz, 1H), 2.28 (s, 3H), 2.17-1.89 (m, 2H), 0.85 (t,  $J = 7.2$  Hz, 3H). <sup>13</sup>C NMR (75 MHz, DMSO-*d*<sub>6</sub>)  $\delta$  174.22, 170.84, 161.93 (<sup>1</sup> $J_{\text{C-F}} = 245.0$  Hz), 153.60, 143.34, 136.20, 132.11, 129.58, 129.22 (<sup>3</sup> $J_{\text{C-F}} = 9.0$  Hz), 127.25 (<sup>4</sup> $J_{\text{C-F}} = 2.7$  Hz), 126.87, 125.68, 124.69, 118.87, 116.32 (<sup>2</sup> $J_{\text{C-F}} = 22.9$  Hz), 110.61, 107.05, 59.09, 23.32, 20.94, 8.98. HRMS (ESI) Calcd for [C<sub>25</sub>H<sub>21</sub>FN<sub>2</sub>O<sub>6</sub>S+Na]<sup>+</sup> 519.0997; Found: 519.0990.

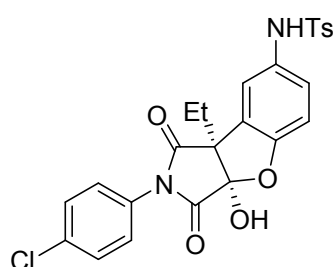

***N*-((3*aR*,8*bS*)-2-(4-chlorophenyl)-8*b*-ethyl-3*a*-hydroxy-1,3-dioxo-2,3,3*a*,8*b*-tetrahydro-1*H*-benzofuro[2,3-*c*]pyrrol-7-yl)-4-methylbenzenesulfonamide (3*ha*):** White solid, M.P.: 104.7-105.2 °C, >99% yield (58.2 mg), 98% ee. HPLC condition: Chiralpak AD-H (hexane/ C<sub>2</sub>H<sub>5</sub>OH: 70/30, 1.0 mL/min.,  $t_{\text{major}} =$

10.1 min.,  $t_{\text{minor}} = 18.6$  min.).  $[\alpha]_{\text{D}}^{20} = -114.7$  (C 1.0, EtOH). <sup>1</sup>H NMR (300 MHz, DMSO-*d*<sub>6</sub>)  $\delta$  9.92 (s, 1H), 9.16 (s, 1H), 7.62-7.50 (m, 4H), 7.35-7.25 (m, 4H), 7.04-6.95 (m, 2H), 6.86 (d,  $J = 8.7$  Hz, 1H), 2.29 (s, 3H), 2.16-1.90 (m, 2H), 0.85 (t,  $J = 7.3$  Hz, 3H). <sup>13</sup>C NMR (75 MHz, DMSO-*d*<sub>6</sub>)  $\delta$  173.91, 170.54, 153.48, 143.14, 136.14, 133.64, 132.03, 129.79, 129.45, 129.25, 128.63, 126.75, 125.50, 124.53, 118.70, 110.48, 106.95, 58.99, 23.20, 20.83, 8.86. HRMS (ESI) Calcd for [C<sub>25</sub>H<sub>21</sub>ClN<sub>2</sub>O<sub>6</sub>S+Na]<sup>+</sup> 535.0701 (<sup>35</sup>Cl), 537.0672 (<sup>37</sup>Cl); Found: 535.0693 (<sup>35</sup>Cl), 537.0669 (<sup>37</sup>Cl).

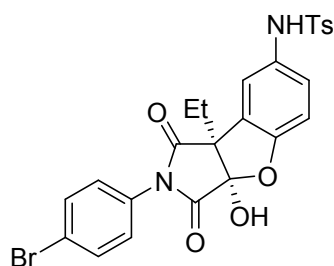

***N*-((3*aR*,8*bS*)-2-(4-bromophenyl)-8*b*-ethyl-3*a*-hydroxy-1,3-dioxo-2,3,3*a*,8*b*-tetrahydro-1*H*-benzofuro[2,3-*c*]pyrrol-7-yl)-4-methylbenzenesulfonamide (3*ia*):** White solid, M.P.: 102.3-102.7 °C, 93% yield (52.0 mg), 99% ee. HPLC condition: Chiralpak AD-H (hexane/C<sub>2</sub>H<sub>5</sub>OH: 70/30, 1.0 mL/min.,  $t_{\text{major}} =$

10.8 min.,  $t_{\text{minor}} = 20.5$  min.).  $[\alpha]_{\text{D}}^{20} = -108.0$  (C 1.0, EtOH). <sup>1</sup>H NMR (300 MHz, DMSO-*d*<sub>6</sub>)  $\delta$  9.93 (s, 1H), 9.18 (s, 1H), 7.69 (d,  $J = 8.6$  Hz, 2H), 7.53 (d,  $J = 8.2$  Hz, 2H), 7.27 (d,  $J = 8.2$  Hz, 2H), 7.21 (d,  $J = 8.6$  Hz, 2H), 7.04-6.95 (m, 2H), 6.85 (d,  $J = 8.3$  Hz, 1H), 2.27 (s, 3H),



2.16-1.88 (m, 2H), 0.83 (t,  $J = 7.2$  Hz, 3H).  $^{13}\text{C}$  NMR (100 MHz,  $\text{DMSO-}d_6$ )  $\delta$  174.41, 171.03, 153.99, 143.72, 136.54, 132.75, 132.52, 130.69, 129.99, 129.44, 127.27, 125.99, 125.04, 122.70, 119.18, 111.04, 107.45, 59.50, 23.72, 21.35, 9.40. HRMS (ESI) Calcd for  $[\text{C}_{25}\text{H}_{21}\text{BrN}_2\text{O}_6\text{S}+\text{Na}]^+$  579.0196 ( $^{79}\text{Br}$ ), 581.0175 ( $^{81}\text{Br}$ ); Found: 579.0174 ( $^{79}\text{Br}$ ), 581.0156 ( $^{81}\text{Br}$ ).

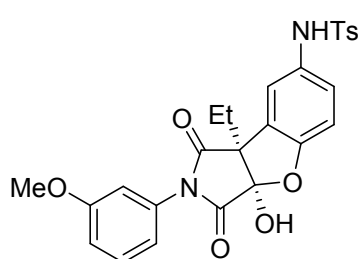

***N*-((3*aR*,8*bS*)-8*b*-ethyl-3*a*-hydroxy-2-(3-methoxy-phenyl)-1,3-dioxo-2,3,3*a*,8*b*-tetrahydro-1*H*-benzofuro[2,3-*c*]pyrrol-7-yl)-4-methylbenzene-sulfonamide (3ja):** White solid, M.P.: 192.1-192.7 °C, 99% yield (50.5 mg), 99% ee. HPLC condition: Chiralpak AD-H (hexane/  $\text{C}_2\text{H}_5\text{OH}$ : 70/30, 1.0 mL/min.,  $t_{\text{major}}$

= 8.7 min.,  $t_{\text{minor}}$  = 14.7 min.).  $[\alpha]_{\text{D}}^{20} = -138.5$  (C 1.0, EtOH).  $^1\text{H}$  NMR (300 MHz,  $\text{DMSO-}d_6$ )  $\delta$  9.94 (s, 1H), 9.15 (s, 1H), 7.54 (d,  $J = 8.2$  Hz, 2H), 7.41 (t,  $J = 8.2$  Hz, 1H), 7.30 (d,  $J = 8.0$  Hz, 2H), 7.08-6.96 (m, 3H), 6.87 (dd,  $J = 7.6, 1.6$  Hz, 1H), 6.81-6.72 (m, 2H), 3.76 (s, 3H), 2.29 (s, 3H), 2.16-1.88 (m, 2H), 0.86 (t,  $J = 7.3$  Hz, 3H).  $^{13}\text{C}$  NMR (100 MHz,  $\text{DMSO-}d_6$ )  $\delta$  174.54, 171.20, 160.17, 153.99, 143.71, 136.58, 132.56, 132.50, 130.59, 129.99, 127.27, 126.13, 124.97, 119.38, 119.15, 115.36, 113.09, 111.03, 107.45, 59.46, 55.97, 23.77, 21.35, 9.44. HRMS (ESI) Calcd for  $[\text{C}_{26}\text{H}_{24}\text{N}_2\text{O}_7\text{S}+\text{Na}]^+$  531.1196; Found: 531.1178.

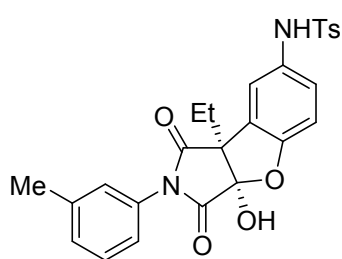

***N*-((3*aR*,8*bS*)-8*b*-ethyl-3*a*-hydroxy-1,3-dioxo-2-(*m*-tolyl)-2,3,3*a*,8*b*-tetrahydro-1*H*-benzofuro[2,3-*c*]pyrrol-7-yl)-4-methylbenzenesulfonamide (3ka):** White solid, M.P.: 103.4-103.9 °C, >99% yield (56.9 mg), 98% ee. HPLC condition: Chiralpak AD-H (hexane/  $\text{C}_2\text{H}_5\text{OH}$ : 70/30, 1.0 mL/min.,  $t_{\text{major}}$  =

8.3 min.,  $t_{\text{minor}}$  = 11.1 min.).  $[\alpha]_{\text{D}}^{20} = -124.8$  (C 1.0, EtOH).  $^1\text{H}$  NMR (300 MHz,  $\text{DMSO-}d_6$ )  $\delta$  9.94 (s, 1H), 9.14 (s, 1H), 7.54 (d,  $J = 8.2$  Hz, 2H), 7.38 (t,  $J = 7.7$  Hz, 1H), 7.34-7.23 (m, 3H), 7.06-6.95 (m, 4H), 6.90-6.83 (m, 1H), 2.32 (s, 3H), 2.29 (s, 3H), 2.17-1.87 (m, 2H), 0.87 (t,  $J = 7.2$  Hz, 3H).  $^{13}\text{C}$  NMR (75 MHz,  $\text{DMSO-}d_6$ )  $\delta$  174.15, 170.83, 153.47, 143.19, 139.02, 136.17, 132.04, 130.95, 129.81, 129.48, 129.07, 127.13, 126.78, 125.72, 124.50, 123.86,

118.71, 110.49, 106.99, 59.00, 23.27, 20.86, 20.60, 8.95. HRMS (ESI) Calcd for  $[C_{26}H_{24}N_2O_6S+Na]^+$  515.1247; Found: 515.1240.

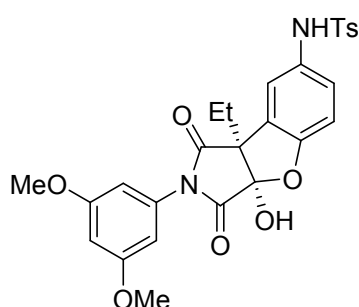

***N*-((3*aR*,8*bS*)-2-(3,5-dimethoxyphenyl)-8*b*-ethyl-3*a*-hydroxy-1,3-dioxo-2,3,3*a*,8*b*-tetrahydro-1*H*-benzofuro[2,3-*c*]pyrrol-7-yl)-4-methylbenzenesulfonamide (3*la*):** White solid, M.P.: 162.9-163.4 °C, 85% yield (45.9 mg), 98% ee. HPLC condition: Chiralpak AD-H (hexane/ $C_2H_5OH$ : 70/30, 1.0 mL/min.,  $t_{major}$  = 13.0 min.,  $t_{minor}$  = 15.9 min.).  $[\alpha]_D^{20}$  = -123.5

(C 1.0, EtOH).  $^1H$  NMR (300 MHz,  $DMSO-d_6$ )  $\delta$  9.94 (s, 1H), 9.12 (s, 1H), 7.54 (d,  $J$  = 8.2 Hz, 2H), 7.30 (d,  $J$  = 8.4 Hz, 2H), 7.04-6.95 (m, 2H), 6.91-6.82 (m, 1H), 6.61 (t,  $J$  = 2.2 Hz, 1H), 6.35 (d,  $J$  = 2.2 Hz, 2H), 3.74 (s, 6H), 2.30 (s, 3H), 2.15-1.87 (m, 2H), 0.85 (t,  $J$  = 7.0 Hz, 3H).  $^{13}C$  NMR (75 MHz,  $DMSO-d_6$ )  $\delta$  173.97, 170.63, 160.69, 153.56, 143.23, 136.16, 132.72, 132.03, 129.53, 126.81, 125.63, 124.45, 118.67, 110.57, 106.96, 105.24, 101.00, 58.99, 55.62, 23.32, 20.87, 8.97. HRMS (ESI) Calcd for  $[C_{27}H_{26}N_2O_8S+Na]^+$  561.1302; Found: 561.1308.

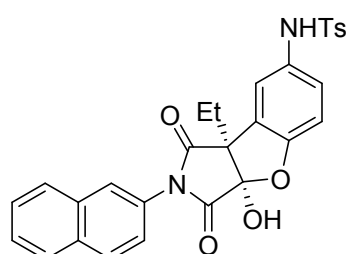

***N*-((3*aR*,8*bS*)-8*b*-ethyl-3*a*-hydroxy-2-(naphthalen-2-yl)-1,3-dioxo-2,3,3*a*,8*b*-tetrahydro-1*H*-benzofuro[2,3-*c*]pyrrol-7-yl)-4-methylbenzenesulfonamide (3*ma*):** White solid, M.P.: 101.7-102.2 °C, >99% yield (58.0 mg), 98% ee. HPLC condition: Chiralpak AD-H (hexane/ $C_2H_5OH$ : 70/30, 1.0 mL/min.,  $t_{major}$  =

16.1 min.,  $t_{minor}$  = 30.5 min.).  $[\alpha]_D^{20}$  = -145.2 (C 0.5, EtOH).  $^1H$  NMR (400 MHz,  $DMSO-d_6$ )  $\delta$  9.99 (s, 1H), 9.25 (s, 1H), 8.05 (d,  $J$  = 8.8 Hz, 1H), 8.00 (dd,  $J$  = 6.8, 2.3 Hz, 2H), 7.89 (d,  $J$  = 1.7 Hz, 1H), 7.65-7.58 (m, 2H), 7.56 (d,  $J$  = 8.2 Hz, 2H), 7.35-7.27 (m, 3H), 7.07-7.00 (m, 2H), 6.91 (d,  $J$  = 9.1 Hz, 1H), 2.27 (s, 3H), 2.20-1.96 (m, 2H), 0.92 (t,  $J$  = 7.3 Hz, 3H).  $^{13}C$  NMR (100 MHz,  $DMSO-d_6$ )  $\delta$  174.82, 171.47, 154.01, 143.73, 136.56, 133.11, 133.01, 132.55, 130.00, 129.56, 128.88, 128.52, 128.19, 127.79, 127.44, 127.28, 126.49, 126.17, 125.03, 124.72, 119.21, 111.07, 107.56, 59.59, 23.81, 21.34, 9.52. HRMS (ESI) Calcd for  $[C_{29}H_{24}N_2O_6S+Na]^+$  551.1247; Found: 551.1236.

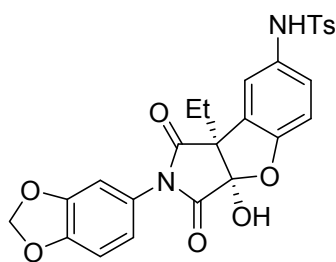

***N*-((3*aR*,8*bS*)-2-(benzo[d][1,3]dioxol-5-yl)-8*b*-ethyl-3*a*-hydroxy-1,3-dioxo-2,3,3*a*,8*b*-tetrahydro-1*H*-benzofuro[2,3-*c*]pyrrol-7-yl)-4-methylbenzenesulfonamide (3*na*):** White solid,

M.P.: 204.3-204.8 °C, >99% yield (62.3 mg), 98% ee. HPLC condition: Chiralpak AD-H (hexane/C<sub>2</sub>H<sub>5</sub>OH: 70/30, 1.0 mL/min.,  $t_{\text{major}} = 15.7$  min.,  $t_{\text{minor}} = 30.8$  min.).  $[\alpha]_{\text{D}}^{20} = -118.5$  (C 1.0, EtOH). <sup>1</sup>H NMR (300 MHz, DMSO-*d*<sub>6</sub>)  $\delta$  9.94 (s, 1H), 9.13 (s, 1H), 7.54 (d,  $J = 8.2$  Hz, 2H), 7.30 (d,  $J = 8.2$  Hz, 2H), 7.05-6.96 (m, 3H), 6.90-6.81 (m, 2H), 6.65 (dd,  $J = 8.3, 1.9$  Hz, 1H), 6.09 (s, 2H), 2.29 (s, 3H), 2.16-1.87 (m, 2H), 0.85 (t,  $J = 7.2$  Hz, 3H). <sup>13</sup>C NMR (100 MHz, DMSO-*d*<sub>6</sub>)  $\delta$  174.74, 171.38, 153.99, 148.19, 148.15, 143.72, 136.55, 132.46, 129.99, 127.28, 126.13, 124.95, 124.85, 121.20, 119.16, 111.00, 108.79, 108.33, 107.39, 102.46, 59.40, 23.76, 21.36, 9.44. HRMS (ESI) Calcd for [C<sub>26</sub>H<sub>22</sub>N<sub>2</sub>O<sub>8</sub>S+Na]<sup>+</sup> 545.0989.1247; Found: 545.0968.

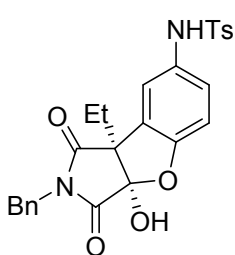

***N*-((3*aR*,8*bS*)-2-benzyl-8*b*-ethyl-3*a*-hydroxy-1,3-dioxo-2,3,3*a*,8*b*-tetrahydro-1*H*-benzofuro[2,3-*c*]pyrrol-7-yl)-4-methylbenzenesulfonamide (3*oa*):** White solid, M.P.: 85.2-86.2 °C, 97% yield (47.7 mg),

95% ee. HPLC condition: Chiralpak AD-H (hexane/ C<sub>2</sub>H<sub>5</sub>OH: 70/30, 1.0 mL/min,  $t_{\text{major}} = 7.5$  min.,  $t_{\text{minor}} = 10.1$  min.).  $[\alpha]_{\text{D}}^{20} = -101.7$  (C 1.0, EtOH). <sup>1</sup>H NMR (300 MHz, DMSO-*d*<sub>6</sub>)  $\delta$  9.91 (s, 1H), 9.05 (s, 1H), 7.52 (d,  $J = 8.3$  Hz, 2H), 7.32-7.22 (m, 5H), 7.14-7.06 (m, 2H), 7.00-6.92 (m, 2H), 6.80 (d,  $J = 8.4$  Hz, 1H), 4.62 (s, 2H), 2.31 (s, 3H), 2.02-1.82 (m, 2H), 0.70 (t,  $J = 7.3$  Hz, 3H). <sup>13</sup>C NMR (75 MHz, DMSO-*d*<sub>6</sub>)  $\delta$  174.60, 171.30, 153.24, 143.13, 136.16, 135.29, 131.94, 129.45, 128.58, 127.73, 127.25, 126.72, 125.70, 124.39, 118.59, 110.27, 107.04, 58.90, 41.78, 23.13, 20.88, 8.84. HRMS (ESI) Calcd for [C<sub>26</sub>H<sub>24</sub>N<sub>2</sub>O<sub>6</sub>S+Na]<sup>+</sup> 515.1247; Found: 515.1233.

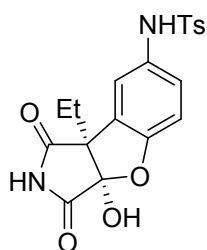

***N*-((3*aR*,8*bS*)-8*b*-ethyl-3*a*-hydroxy-1,3-dioxo-2,3,3*a*,8*b*-tetrahydro-1*H*-benzofuro[2,3-*c*]pyrrol-7-yl)-4-methylbenzenesulfonamide (3*pa*):**

White solid, M.P.: 110.8-111.2 °C, >99% yield (43.9 mg), 97% ee. HPLC condition: Chiralpak IC (hexane/isopropanol: 80/20, 1.0 mL/min.,  $t_{\text{major}} = 11.9$  min.,  $t_{\text{minor}} = 19.1$  min.).  $[\alpha]_{\text{D}}^{20} = -94.8$  (C 1.0, EtOH). <sup>1</sup>H NMR (300

MHz, DMSO-*d*<sub>6</sub>)  $\delta$  11.99 (brs, 1H), 9.92 (s, 1H), 8.85 (s, 1H), 7.55 (d, *J* = 7.9 Hz, 2H), 7.31 (d, *J* = 7.9 Hz, 2H), 6.95 (d, *J* = 6.2 Hz, 2H), 6.79 (d, *J* = 9.1 Hz, 1H), 2.31 (s, 3H), 1.88 (ddd, *J* = 31.5, 14.3, 7.4 Hz, 2H), 0.78 (t, *J* = 7.0 Hz, 3H). <sup>13</sup>C NMR (75 MHz, DMSO-*d*<sub>6</sub>)  $\delta$  176.00, 172.98, 153.45, 143.28, 136.31, 131.88, 129.59, 126.86, 126.21, 124.25, 118.66, 110.27, 107.93, 59.74, 22.89, 20.98, 8.98. HRMS (ESI) Calcd for [C<sub>19</sub>H<sub>18</sub>N<sub>2</sub>O<sub>6</sub>S+Na]<sup>+</sup> 425.0778; Found: 425.0771.

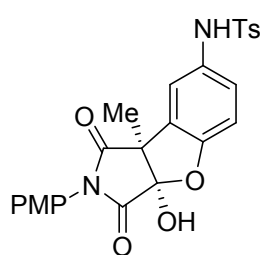

***N*-((3*aR*,8*bS*)-3*a*-hydroxy-2-(4-methoxyphenyl)-8*b*-methyl-1,3-dioxo-2,3,3*a*,8*b*-tetrahydro-1*H*-benzo-furo[2,3-*c*]pyrrol-7-yl)-4-methylbenzenesulfonamide (3qa):** White solid, M.P.: 229.8-230.4 °C, >99% yield (53.1 mg), 94% ee. HPLC condition: Chiralpak AD-H (hexane/C<sub>2</sub>H<sub>5</sub>OH: 70/30, 1.0 mL/min., *t*<sub>major</sub> = 19.5 min., *t*<sub>minor</sub> =

39.3 min.). [ $\alpha$ ]<sub>D</sub><sup>20</sup> = -116.7 (C 1.0, EtOH). <sup>1</sup>H NMR (300 MHz, DMSO-*d*<sub>6</sub>)  $\delta$  9.94 (s, 1H), 8.99 (s, 1H), 7.55 (d, *J* = 8.2 Hz, 2H), 7.30 (d, *J* = 8.0 Hz, 2H), 7.20-7.13(m, 2H), 7.06-6.96 (m, 4H), 6.86 (d, *J* = 8.4 Hz, 1H), 3.78 (s, 3H), 2.30 (s, 3H), 1.50 (s, 3H). <sup>13</sup>C NMR (75 MHz, DMSO-*d*<sub>6</sub>)  $\delta$  174.82, 170.65, 159.37, 153.02, 143.20, 136.22, 132.09, 129.49, 128.17, 127.20, 126.78, 124.35, 123.61, 118.41, 114.31, 110.41, 107.10, 55.42, 54.96, 20.88, 15.56. HRMS (ESI) Calcd for [C<sub>25</sub>H<sub>22</sub>N<sub>2</sub>O<sub>7</sub>S+Na]<sup>+</sup> 517.1040; Found: 517.1033.

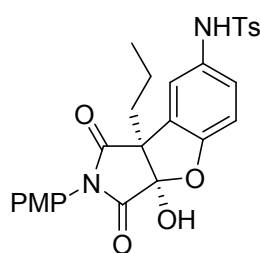

***N*-((3*aR*,8*bS*)-3*a*-hydroxy-2-(4-methoxyphenyl)-1,3-dioxo-8*b*-propyl-2,3,3*a*,8*b*-tetrahydro-1*H*-benzofuro[2,3-*c*]pyrrol-7-yl)-4-methylbenzenesulfonamide (3ra):** White solid, M.P.: 196.5-197.0 °C, >99% yield (62.2 mg), 99% ee. HPLC condition: Chiralpak AD-H (hexane/C<sub>2</sub>H<sub>5</sub>OH: 70/30, 1.0 mL/min, *t*<sub>major</sub> = 16.8 min., *t*<sub>minor</sub> = 35.5

min.). [ $\alpha$ ]<sub>D</sub><sup>20</sup> = -132.9 (C 1.0, EtOH). <sup>1</sup>H NMR (300 MHz, DMSO-*d*<sub>6</sub>)  $\delta$  9.93 (s, 1H), 9.16 (s, 1H), 7.53 (d, *J* = 8.2 Hz, 2H), 7.30 (d, *J* = 8.2 Hz, 2H), 7.11 (dd, *J* = 9.2, 2.3 Hz, 2H), 7.07-6.98 (m, 3H), 6.95 (d, *J* = 2.1 Hz, 1H), 6.86 (d, *J* = 8.6 Hz, 1H), 3.77 (s, 3H), 2.29 (s, 3H), 2.04-1.78 (m, 2H), 1.34-1.09 (m, 2H), 0.86 (t, *J* = 7.2 Hz, 3H). <sup>13</sup>C NMR (75 MHz, DMSO-*d*<sub>6</sub>)  $\delta$  174.51, 171.13, 159.58, 153.56, 143.36, 136.16, 132.05, 129.62, 128.19, 126.94,

125.95, 124.89, 123.54, 118.94, 114.60, 110.66, 107.07, 58.74, 55.56, 32.28, 21.03, 17.71, 14.37. HRMS (ESI) Calcd for  $[C_{27}H_{26}N_2O_7S+Na]^+$  545.1353; Found: 545.1362.

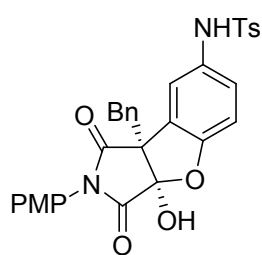

***N*-((3a*R*,8b*S*)-8b-benzyl-3a-hydroxy-2-(4-methoxyphenyl)-1,3-dioxo-2,3,3a,8b-tetrahydro-1*H*-benzofuro[2,3-*c*]pyrrol-7-yl)-4-methylbenzenesulfonamide (3sa):** White solid, M.P.: 112.3-112.8 °C, >99% yield (57.7 mg), 99% ee. HPLC condition: Chiralpak IC (hexane/ $C_2H_5OH$ : 90/10, 0.8 mL/min.,  $t_{minor}$  = 33.1 min.,  $t_{major}$  = 36.9 min.).

$[\alpha]_D^{20}$  = -175.7 (C 1.0, EtOH).  $^1H$  NMR (400 MHz,  $DMSO-d_6$ )  $\delta$  10.02 (s, 1H), 9.48 (s, 1H), 7.60 (d,  $J$  = 8.2 Hz, 2H), 7.33 (dd,  $J$  = 8.9, 5.2 Hz, 4H), 7.30-7.26 (m, 3H), 7.25 (d,  $J$  = 2.2 Hz, 1H), 6.97 (dd,  $J$  = 8.6, 2.3 Hz, 1H), 6.95-6.89 (m, 2H), 6.87 (d,  $J$  = 8.6 Hz, 1H), 6.62-6.54 (m, 2H), 3.74 (s, 3H), 3.38 (s, 2H), 2.32 (s, 3H).  $^{13}C$  NMR (100 MHz,  $DMSO-d_6$ )  $\delta$  173.61, 170.95, 159.89, 154.09, 143.74, 136.81, 135.42, 132.58, 131.11, 130.07, 128.58, 128.21, 127.61, 127.29, 126.02, 124.87, 123.59, 119.58, 114.84, 111.12, 107.15, 61.49, 55.86, 35.49, 21.39. HRMS (ESI) Calcd for  $[C_{31}H_{26}N_2O_7S+Na]^+$  593.1353; Found: 593.1361.

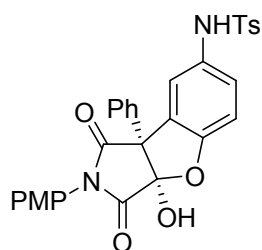

***N*-((3a*R*,8b*S*)-3a-hydroxy-2-(4-methoxyphenyl)-1,3-dioxo-8b-phenyl-2,3,3a,8b-tetrahydro-1*H*-benzofuro[2,3-*c*]pyrrol-7-yl)-4-methylbenzenesulfonamide (3ta):** White solid, M.P.: 251.7-252.4 °C, >99% yield (57.3 mg), >99% ee. HPLC condition: Chiralpak AD-H (hexane/ $C_2H_5OH$ : 70/30, 1.0 mL/min.,  $t_{minor}$  = 7.0 min.,  $t_{major}$  =

12.0 min.).  $[\alpha]_D^{20}$  = -72.8 (C 1.0, EtOH).  $^1H$  NMR (300 MHz,  $DMSO-d_6$ )  $\delta$  9.97 (s, 1H), 9.00 (s, 1H), 7.52 (d,  $J$  = 8.2 Hz, 2H), 7.42-7.30 (m, 5H), 7.26 (d,  $J$  = 8.9 Hz, 2H), 7.18 (dd,  $J$  = 8.7, 2.3 Hz, 1H), 7.07 (d,  $J$  = 8.9 Hz, 2H), 7.02 (d,  $J$  = 8.7 Hz, 1H), 6.96-6.85 (m, 3H), 3.79 (s, 3H), 2.33 (s, 3H).  $^{13}C$  NMR (75 MHz,  $DMSO-d_6$ )  $\delta$  173.97, 171.05, 159.75, 154.40, 143.43, 135.95, 133.73, 132.36, 129.69, 128.89, 128.41, 126.93, 125.86, 125.22, 123.58, 120.26, 114.66, 111.22, 107.68, 64.95, 55.61, 21.10. HRMS (ESI) Calcd for  $[C_{30}H_{24}N_2O_7S+Na]^+$  579.1196; Found: 579.1199.

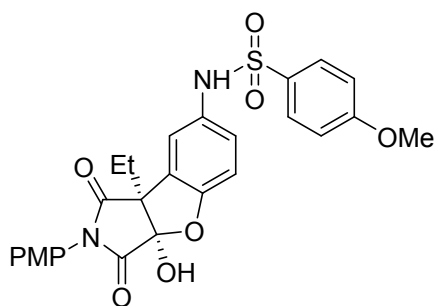

***N*-((3*aR*,8*bS*)-3*a*-hydroxy-2-(4-methoxyphenyl)-1,3-dioxo-8*b*-phenyl-2,3,3*a*,8*b*-tetrahydro-1*H*-benzofuro[2,3-*c*]pyrrol-7-yl)-4-methoxybenzenesulfonamide (**3ab**):**

White solid, M. P.: 152.9-153.6 °C, 93% yield (48.7 mg), 94% ee. HPLC condition: Chiralpak AD-H (hexane/C<sub>2</sub>H<sub>5</sub>OH: 70/30, 1.0 mL/min, *t*<sub>major</sub> = 17.8 min., *t*<sub>minor</sub> = 58.1 min.). [ $\alpha$ ]<sub>D</sub><sup>20</sup> = -134.7 (C 1.0, EtOH). <sup>1</sup>H NMR (300 MHz, DMSO-*d*<sub>6</sub>)  $\delta$  9.85 (s, 1H), 9.12 (s, 1H), 7.58 (d, *J* = 8.9 Hz, 2H), 7.16-7.10 (m, 2H), 7.06-6.96 (m, 6H), 6.86 (d, *J* = 8.4 Hz, 1H), 3.78 (s, 3H), 3.75 (s, 3H), 2.16-1.89 (m, 2H), 0.86 (t, *J* = 7.3 Hz, 3H). <sup>13</sup>C NMR (75 MHz, DMSO-*d*<sub>6</sub>)  $\delta$  174.34, 171.00, 162.40, 159.44, 153.45, 132.12, 130.63, 128.94, 128.03, 125.71, 124.53, 123.46, 118.74, 114.45, 114.21, 110.44, 106.93, 58.91, 55.55, 55.43, 23.25, 8.94. HRMS (ESI) Calcd for [C<sub>26</sub>H<sub>24</sub>N<sub>2</sub>O<sub>8</sub>S+Na]<sup>+</sup> 547.1146; Found: 547.1156.

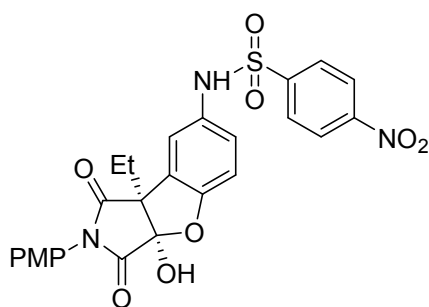

***N*-((3*aR*,8*bS*)-3*a*-hydroxy-2-(4-nitrophenyl)-1,3-dioxo-8*b*-phenyl-2,3,3*a*,8*b*-tetrahydro-1*H*-benzofuro[2,3-*c*]pyrrol-7-yl)-4-nitrobenzenesulfonamide (**3ac**):**

White solid, M.P.: 180.3-181.1 °C, 99% yield (53.7 mg), 92% ee. HPLC condition: Chiralpak AD-H (hexane/C<sub>2</sub>H<sub>5</sub>OH: 70/30, 1.0 mL/min., *t*<sub>major</sub> = 14.6 min., *t*<sub>minor</sub> = 24.8 min.). [ $\alpha$ ]<sub>D</sub><sup>20</sup> = -102.5 (C 1.0, EtOH). <sup>1</sup>H NMR (300 MHz, DMSO-*d*<sub>6</sub>)  $\delta$  10.34 (brs, 1H), 9.17 (s, 1H), 8.34 (d, *J* = 8.7 Hz, 2H), 7.89 (d, *J* = 8.7 Hz, 2H), 7.12 (d, *J* = 8.9 Hz, 2H), 7.08-6.99 (m, 3H), 6.98-6.94 (m, 1H), 6.91 (d, *J* = 8.6 Hz, 1H), 3.78 (s, 3H), 2.17-1.87 (m, 2H), 0.85 (t, *J* = 7.2 Hz, 3H). <sup>13</sup>C NMR (75 MHz, DMSO-*d*<sub>6</sub>)  $\delta$  174.35, 170.98, 159.52, 154.15, 149.83, 144.43, 130.95, 128.49, 128.11, 126.09, 125.56, 124.52, 123.45, 119.64, 114.51, 110.83, 107.09, 58.96, 55.48, 23.30, 9.03. HRMS (ESI) Calcd for [C<sub>25</sub>H<sub>21</sub>N<sub>3</sub>O<sub>9</sub>S+Na]<sup>+</sup> 562.0891; Found: 562.0886.

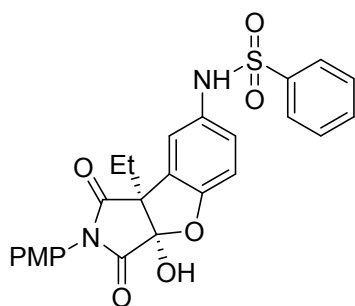

***N*-((3*aR*,8*bS*)-3*a*-hydroxy-2-(4-methoxyphenyl)-1,3-dioxo-8*b*-phenyl-2,3,3*a*,8*b*-tetrahydro-1*H*-benzofuro[2,3-*c*]pyrrol-7-yl)benzenesulfonamide (3ad):** White solid, M.P.: 106.8-107.4 °C, 87% yield (43.3 mg), 98% ee. HPLC condition: Chiralpak AD-H (hexane/C<sub>2</sub>H<sub>5</sub>OH: 70/30, 1.0 mL/min., *t*<sub>major</sub> = 53.8 min., *t*<sub>minor</sub> = 84.9 min.). [ $\alpha$ ]<sub>D</sub><sup>20</sup> = -141.4 (C 1.0, EtOH). <sup>1</sup>H

NMR (300 MHz, DMSO-*d*<sub>6</sub>)  $\delta$  10.04 (s, 1H), 9.12 (s, 1H), 7.70-7.65 (m, 2H), 7.61-7.56 (m, 1H), 7.55-7.48 (m, 2H), 7.15-7.09 (m, 2H), 7.06-6.97 (m, 4H), 6.89- 6.84 (m, 1H), 3.78 (s, 3H), 2.14-1.89 (m, 2H), 0.85 (t, *J* = 7.0 Hz, 3H). <sup>13</sup>C NMR (75 MHz, DMSO-*d*<sub>6</sub>)  $\delta$  174.38, 171.01, 159.47, 153.58, 139.04, 132.87, 131.87, 129.14, 128.09, 126.76, 125.80, 124.62, 123.45, 118.74, 114.49, 110.57, 106.98, 58.94, 55.46, 23.27, 9.01. HRMS (ESI) Calcd. for [C<sub>25</sub>H<sub>22</sub>N<sub>2</sub>O<sub>7</sub>S+Na]<sup>+</sup> 517.1040; Found: 517.1034.

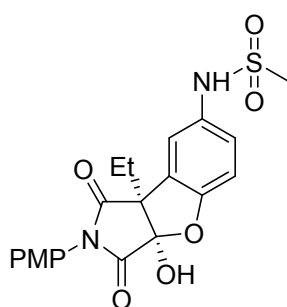

***N*-((3*aR*,8*bS*)-3*a*-hydroxy-2-(4-methoxyphenyl)-1,3-dioxo-8*b*-phenyl-2,3,3*a*,8*b*-tetrahydro-1*H*-benzofuro[2,3-*c*]pyrrol-7-yl)**

**methanesulfonamide (3ae):** White solid, M.P.: 146.2-147.0 °C, >99% yield (45.7 mg), 81% ee. HPLC condition: Chiralpak AD-H (hexane/C<sub>2</sub>H<sub>5</sub>OH: 70/30, 1.0 mL/min., *t*<sub>major</sub> = 10.2 min., *t*<sub>minor</sub> = 25.6 min.). [ $\alpha$ ]<sub>D</sub><sup>20</sup> = -121.5 (C 1.0, EtOH). <sup>1</sup>H NMR (300 MHz, DMSO-*d*<sub>6</sub>)

$\delta$  9.52 (s, 1H), 9.18 (s, 1H), 7.25 (d, *J* = 2.1 Hz, 1H), 7.21-7.14 (m, 3H), 7.06-7.01 (m, 2H), 6.98 (d, *J* = 8.6 Hz, 1H), 3.78 (s, 3H), 2.92 (s, 3H), 2.31-2.01 (m, 2H), 0.98 (t, *J* = 7.3 Hz, 3H). <sup>13</sup>C NMR (100 MHz, DMSO-*d*<sub>6</sub>)  $\delta$  174.94, 171.53, 159.93, 154.02, 133.10, 128.63, 126.54, 124.74, 123.92, 119.02, 114.96, 111.13, 107.38, 59.71, 55.91, 39.23, 23.97, 9.68. HRMS (ESI) Calcd for [C<sub>20</sub>H<sub>20</sub>N<sub>2</sub>O<sub>7</sub>S+Na]<sup>+</sup> 455.0883; Found: 455.0870.

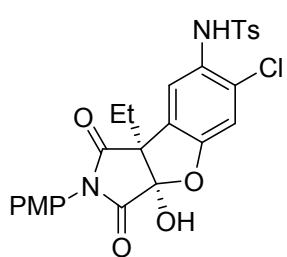

***N*-((3*aR*,8*bS*)-6-chloro-3*a*-hydroxy-2-(4-methoxyphenyl)-1,3-dioxo-8*b*-phenyl-2,3,3*a*,8*b*-tetrahydro-1*H*-benzofuro[2,3-*c*]**

**pyrrol-7-yl)-4-methylbenzenesulfonamide (3af):** White solid, M.P.: 172.9-173.3 °C, 94% yield (50.9 mg), 65% ee. HPLC condition: Chiralpak AD-H (hexane/ C<sub>2</sub>H<sub>5</sub>OH: 70/30, 1.0 mL/min., *t*<sub>major</sub> = 6.6

min.,  $t_{\text{minor}} = 15.2$  min.).  $[\alpha]_{\text{D}}^{20} = -42.8$  (C 1.0, EtOH).  $^1\text{H NMR}$  (300 MHz,  $\text{DMSO-}d_6$ )  $\delta$  10.18 (s, 1H), 9.46 (s, 1H), 7.57 (d,  $J = 8.2$  Hz, 2H), 7.33 (d,  $J = 8.2$  Hz, 2H), 7.22-7.13 (m, 2H), 7.10-7.03 (m, 2H), 6.99 (dd,  $J = 15.0, 2.0$  Hz, 2H), 3.78 (s, 3H), 2.30 (s, 3H), 2.18-.88 (m, 2H), 0.85 (t,  $J = 7.3$  Hz, 3H).  $^{13}\text{C NMR}$  (75 MHz,  $\text{DMSO-}d_6$ )  $\delta$  173.76, 170.32, 159.56, 149.50, 143.58, 135.87, 133.03, 129.70, 128.19, 127.50, 126.82, 123.39, 123.34, 117.05, 114.47, 114.12, 107.66, 59.60, 55.49, 23.46, 20.92, 8.90. HRMS (ESI) Calcd for  $[\text{C}_{26}\text{H}_{23}\text{ClN}_2\text{O}_7\text{S}+\text{Na}]^+$  565.0807 ( $^{35}\text{Cl}$ ), 567.0777 ( $^{37}\text{Cl}$ ); Found: 565.0789 ( $^{35}\text{Cl}$ ), 567.0783 ( $^{37}\text{Cl}$ ).

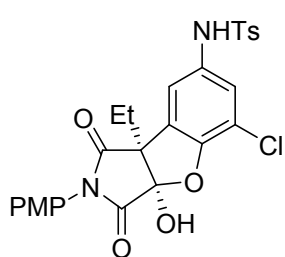

***N*-((3*aR*,8*bS*)-5-chloro-3*a*-hydroxy-2-(4-methoxyphenyl)-1,3-dioxo-8*b*-phenyl-2,3,3*a*,8*b*-tetrahydro-1*H*-benzofuro[2,3-*c*]pyrrol**

**-7-yl)-4-methylbenzenesulfonamide (3ag):** White solid, M.P.: 112.2-112.7 °C, 97% yield (52.7 mg), 68% ee. HPLC condition: Chiralpak AD-H (hexane/ $\text{C}_2\text{H}_5\text{OH}$ : 70/30, 1.0 mL/min.,  $t_{\text{major}} = 6.9$

min.,  $t_{\text{minor}} = 15.6$  min.).  $[\alpha]_{\text{D}}^{20} = -44.3$  (C 1.0, EtOH).  $^1\text{H NMR}$  (300 MHz,  $\text{DMSO-}d_6$ )  $\delta$  10.18 (brs, 1H), 9.46 (brs, 1H), 7.57 (d,  $J = 8.2$  Hz, 2H), 7.33 (d,  $J = 8.2$  Hz, 2H), 7.17 (d,  $J = 8.9$  Hz, 2H), 7.10-7.03 (m, 2H), 7.03-6.94 (m, 2H), 3.78 (s, 3H), 2.30 (s, 3H), 2.16-1.91 (m, 2H), 0.86 (t,  $J = 7.2$  Hz, 3H).  $^{13}\text{C NMR}$  (75 MHz,  $\text{DMSO-}d_6$ )  $\delta$  173.82, 170.39, 159.60, 149.55, 143.65, 135.87, 133.07, 129.76, 128.26, 127.54, 126.88, 123.42, 123.36, 117.07, 114.51, 114.17, 107.70, 59.65, 55.52, 23.52, 20.98, 8.96. HRMS (ESI) Calcd for  $[\text{C}_{26}\text{H}_{23}\text{ClN}_2\text{O}_7\text{S}+\text{Na}]^+$  565.0807 ( $^{35}\text{Cl}$ ), 567.0777 ( $^{37}\text{Cl}$ ); Found: 565.0792 ( $^{35}\text{Cl}$ ), 567.0790 ( $^{37}\text{Cl}$ ).

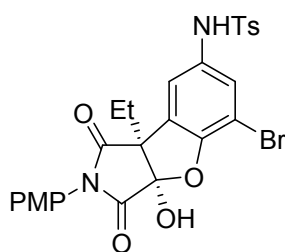

***N*-((3*aR*,8*bS*)-5-bromo-3*a*-hydroxy-2-(4-methoxyphenyl)-1,3-dioxo-8*b*-phenyl-2,3,3*a*,8*b*-tetrahydro-1*H*-benzofuro[2,3-*c*]pyrrol**

**-7-yl)-4-methylbenzenesulfonamide (3ah):** White solid, M.P.: 134.3-134.8 °C, 62% yield (36.1 mg), 49% ee. HPLC condition: Chiralpak AD-H (hexane/ $\text{C}_2\text{H}_5\text{OH}$ : 70/30, 1.0 mL/min.,  $t_{\text{major}} = 7.1$

min.,  $t_{\text{minor}} = 17.9$  min.).  $[\alpha]_{\text{D}}^{20} = -17.9$  (C 1.0, EtOH).  $^1\text{H NMR}$  (300 MHz,  $\text{DMSO-}d_6$ )  $\delta$  10.17 (s, 1H), 9.45 (s, 1H), 7.59 (d,  $J = 8.3$  Hz, 2H), 7.33 (d,  $J = 8.0$  Hz, 2H), 7.23-7.13 (m,



3H), 7.06-6.98 (m, 3H), 3.78 (s, 3H), 2.30 (s, 3H), 2.19-1.91 (m, 2H), 0.87 (t,  $J = 7.3$  Hz, 3H).  $^{13}\text{C}$  NMR (75 MHz, DMSO- $d_6$ )  $\delta$  173.87, 170.42, 159.58, 151.01, 143.61, 135.89, 133.27, 129.73, 128.23, 127.08, 126.87, 126.07, 123.41, 117.59, 114.49, 107.36, 101.94, 59.85, 55.49, 23.59, 20.96, 8.97. HRMS (ESI) Calcd for  $[\text{C}_{26}\text{H}_{23}\text{BrN}_2\text{O}_7\text{S}+\text{Na}]^+$  609.0302 ( $^{79}\text{Br}$ ), 611.0281 ( $^{81}\text{Br}$ ); Found: 609.0296 ( $^{79}\text{Br}$ ), 611.0289 ( $^{81}\text{Br}$ ).

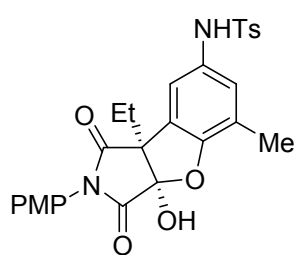

***N*-((3*aR*,8*bS*)-3*a*-hydroxy-2-(4-methoxyphenyl)-5-methyl-1,3-dioxo-8*b*-phenyl-2,3,3*a*,8*b*-tetrahydro-1*H*-benzofuro[2,3-*c*]pyrrol-7-yl)-4-methylbenzenesulfonamide (3*ai*):**

White solid, M.P.: 98.9-99.4 °C, 96% yield (50.3 mg), 75% ee. HPLC condition: Chiralpak AD-H (hexane/ $\text{C}_2\text{H}_5\text{OH}$ : 70/30, 1.0 mL/min.,  $t_{\text{major}} = 8.4$  min.,  $t_{\text{minor}} = 38.1$  min.).  $[\alpha]_{\text{D}}^{20} = -73.7$  (C 1.0, EtOH).  $^1\text{H}$  NMR (300 MHz, DMSO- $d_6$ )  $\delta$  9.89 (brs, 1H), 9.08 (brs, 1H), 7.56 (d,  $J = 8.2$  Hz, 2H), 7.30 (d,  $J = 8.1$  Hz, 2H), 7.17-7.08 (m, 2H), 7.07-6.97 (m, 2H), 6.84 (dd,  $J = 18.2, 1.7$  Hz, 2H), 3.78 (s, 3H), 2.30 (s, 3H), 2.09 (s, 3H), 2.07-1.86 (m, 2H), 0.85 (t,  $J = 7.3$  Hz, 3H).  $^{13}\text{C}$  NMR (75 MHz, DMSO- $d_6$ )  $\delta$  174.53, 171.19, 159.50, 152.10, 143.26, 136.31, 131.93, 129.57, 128.13, 126.88, 125.40, 125.04, 123.54, 120.25, 115.93, 114.52, 106.70, 59.30, 55.51, 23.44, 20.95, 14.97, 9.05. HRMS (ESI) Calcd for  $[\text{C}_{27}\text{H}_{26}\text{N}_2\text{O}_7\text{S}+\text{Na}]^+$  545.1353; Found: 545.1363.

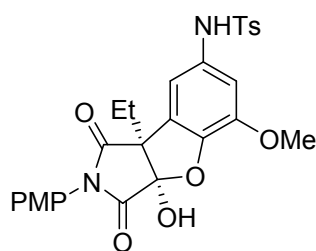

***N*-((3*aR*,8*bS*)-3*a*-hydroxy-5-methoxy-2-(4-methoxyphenyl)-1,3-dioxo-8*b*-phenyl-2,3,3*a*,8*b*-tetrahydro-1*H*-benzofuro[2,3-*c*]pyrrol-7-yl)-4-methylbenzenesulfonamide (3*aj*):**

White solid, M.P.: 192.4-193.1 °C, 96% yield (51.5 mg), 68% ee. HPLC condition: Chiralpak AD-H (hexane/ $\text{C}_2\text{H}_5\text{OH}$ : 70/30, 1.0 mL/min.,  $t_{\text{major}} = 47.1$  min.,  $t_{\text{minor}} = 83.7$  min.).  $[\alpha]_{\text{D}}^{20} = -57.2$  (C 1.0, EtOH).  $^1\text{H}$  NMR (300 MHz, DMSO- $d_6$ )  $\delta$  9.93 (brs, 1H), 9.11 (brs, 1H), 7.57 (d,  $J = 8.3$  Hz, 2H), 7.31 (d,  $J = 7.9$  Hz, 2H), 7.13 (d,  $J = 9.0$  Hz, 2H), 7.02 (d,  $J = 9.1$  Hz, 2H), 6.73 (d,  $J = 1.9$  Hz, 1H), 6.55 (d,  $J = 2.0$  Hz, 1H), 3.79 (s, 3H), 3.71 (s, 3H), 2.31 (s, 3H), 2.13-1.85 (m, 2H), 0.82 (t,  $J = 7.2$  Hz, 3H).  $^{13}\text{C}$  NMR (75 MHz, DMSO- $d_6$ )  $\delta$  174.28, 170.93, 159.44, 143.73, 143.26, 141.89, 136.08, 132.77,

129.50, 128.08, 126.89, 126.08, 123.47, 114.45, 109.45, 107.92, 107.06, 59.30, 55.75, 55.44, 23.14, 20.90, 8.91. HRMS (ESI) Calcd for  $[C_{27}H_{26}N_2O_8S+Na]^+$  561.1302; Found: 561.1319.

## 5. Transformation of **3aa**:

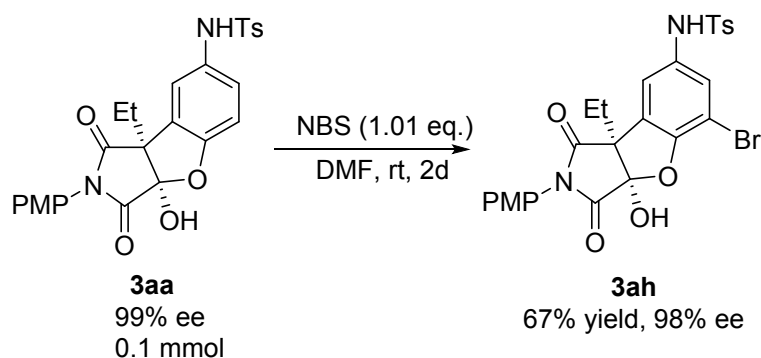

**3aa** (50.8 mg, 0.1 mmol, 1 equiv.) was dissolved in 1.0 mL of dimethyl formamide, NBS (17.9 mg, 0.101 mmol, 1.01 equiv.) was added to the mixture, and the mixture was stirred at room temperature for 2 days. After the reaction finished, the mixture was extracted with EtOAc (3×10 mL). The organic phase was washed with water, brine, dried over anhydrous  $Na_2SO_4$  and concentrated *in vacuo* to get the crude product, which was purified by column chromatography on silica gel eluting with PE/EA (5:1 to 2:1) to afford product **3ah** (39.4 mg, 67% yield, 98% ee).

### References:

- [1] (a) Y. Yang, H. X. Ren, F. Chen, Z. B. Zhang, Y. Zou, C. Chen, X. J. Song, F. Tian, L. Peng and L. X. Wang, *Org. Lett.* 2017, **19**, 2805-2808. (b) M. Xiang, C. Y. Li, X. J. Song, Y. Zou, Z. C. Huang, X. Li, F. Tian and L. X. Wang, *Chem. Commun.* 2020, **56**, 14825-14828.
- [2] (a) L. H. Liao, C. Shu, M. M. Zhang, Y. J. Liao, X. Y. Hu, Y. H. Zhang, Z. J. Wu, W. C. Yuan and X. M. Zhang, *Angew. Chem. Int. Ed.* 2014, **53**, 10471-10475. (b) M. D. Ganton and M. A. Kerr, *J. Org. Chem.* 2007, **72**, 574-582.

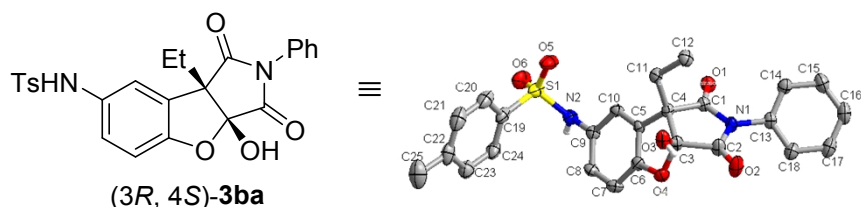

***N*-((3*aR*,8*bS*)-8*b*-ethyl-3*a*-hydroxy-1,3-dioxo-2-phenyl-2,3,3*a*,8*b*-tetrahydro-1*H*-benzofuro[2,3-*c*]pyrrol-7-yl)-4-methylbenzenesulfonamide (**3ba**)**

**Table 1** Crystal data and structure refinement for **3ba**.

| Identification code                                                                           | <b>3ba</b>                                                                   |
|-----------------------------------------------------------------------------------------------|------------------------------------------------------------------------------|
| Empirical formula                                                                             | C <sub>25</sub> H <sub>22</sub> N <sub>2</sub> O <sub>6</sub> S              |
| Formula weight                                                                                | 478.50                                                                       |
| Temperature/K                                                                                 | 293(2)                                                                       |
| Crystal system                                                                                | monoclinic                                                                   |
| Space group                                                                                   | P2 <sub>1</sub>                                                              |
| <i>a</i> /Å, <i>b</i> /Å, <i>c</i> /Å                                                         | 9.9946(7), 6.9904(7), 16.0125(12)                                            |
| $\alpha$ /°, $\beta$ /°, $\gamma$ /°                                                          | 90, 92.321(7), 90                                                            |
| Volume/Å <sup>3</sup>                                                                         | 1117.82(16)                                                                  |
| <i>Z</i> , $\rho_{\text{calc}}$ /g/cm <sup>3</sup> , $\mu$ /mm <sup>-1</sup> , <i>F</i> (000) | 2, 1.422, 1.682, 500.0                                                       |
| Crystal size/mm <sup>3</sup>                                                                  | 0.15 × 0.11 × 0.1                                                            |
| Radiation                                                                                     | CuK $\alpha$ ( $\lambda$ = 1.54184)                                          |
| 2 $\theta$ range for data collection/°                                                        | 10.25 to 141.818                                                             |
| Index ranges                                                                                  | -11 ≤ <i>h</i> ≤ 12, -7 ≤ <i>k</i> ≤ 8, -19 ≤ <i>l</i> ≤ 17                  |
| Reflections collected                                                                         | 9088                                                                         |
| Independent reflections                                                                       | 3889 [ <i>R</i> <sub>int</sub> = 0.0349, <i>R</i> <sub>sigma</sub> = 0.0431] |
| Data/restraints/parameters                                                                    | 3889/2/314                                                                   |
| Goodness-of-fit on <i>F</i> <sup>2</sup>                                                      | 1.029                                                                        |
| Final <i>R</i> indexes [ <i>I</i> ≥ 2 $\sigma$ ( <i>I</i> )]                                  | <i>R</i> <sub>1</sub> = 0.0420, <i>wR</i> <sub>2</sub> = 0.1000              |
| Final <i>R</i> indexes [all data]                                                             | <i>R</i> <sub>1</sub> = 0.0504, <i>wR</i> <sub>2</sub> = 0.1074              |
| Largest diff. peak/hole / e Å <sup>-3</sup>                                                   | 0.14/-0.23                                                                   |

|                 |            |
|-----------------|------------|
| Flack parameter | -0.009(14) |
|-----------------|------------|

**Table 2 Fractional Atomic Coordinates ( $\times 10^4$ ) and Equivalent Isotropic Displacement Parameters ( $\text{\AA}^2 \times 10^3$ ) for 3ba.  $U_{\text{eq}}$  is defined as 1/3 of the trace of the orthogonalised  $U_{\text{IJ}}$  tensor.**

| Atom | x       | y        | z       | U(eq)    |
|------|---------|----------|---------|----------|
| C1   | 7495(3) | 8927(6)  | 6782(2) | 38.6(7)  |
| C2   | 6271(4) | 6501(7)  | 7375(2) | 51.4(10) |
| C3   | 5951(4) | 6393(6)  | 6431(2) | 44.9(9)  |
| C4   | 6592(3) | 8203(5)  | 6061(2) | 37.5(8)  |
| C5   | 7419(3) | 7339(5)  | 5381(2) | 37.0(7)  |
| C6   | 7420(3) | 5392(6)  | 5470(2) | 42.0(8)  |
| C7   | 8101(4) | 4201(6)  | 4952(3) | 51.5(9)  |
| C8   | 8780(3) | 5056(6)  | 4307(3) | 47.9(9)  |
| C9   | 8797(3) | 7026(6)  | 4213(2) | 41.6(8)  |
| C10  | 8115(3) | 8206(6)  | 4752(2) | 39.3(7)  |
| C11  | 5623(4) | 9786(6)  | 5773(2) | 45.2(9)  |
| C12  | 4854(4) | 10712(7) | 6471(3) | 55.9(11) |
| C13  | 7718(3) | 8511(6)  | 8336(2) | 44.1(9)  |
| C14  | 7800(4) | 10411(7) | 8550(3) | 53.8(10) |
| C15  | 8276(5) | 10897(9) | 9348(3) | 68.6(13) |
| C16  | 8624(5) | 9519(9)  | 9922(3) | 71.7(16) |
| C17  | 8540(5) | 7612(9)  | 9697(3) | 66.6(13) |
| C18  | 8096(4) | 7092(7)  | 8894(2) | 55.4(10) |
| C19  | 7980(4) | 7235(7)  | 2162(2) | 55.8(11) |
| C20  | 6725(5) | 7718(9)  | 1827(3) | 72.3(16) |
| C21  | 6033(5) | 6388(11) | 1338(3) | 85(2)    |
| C22  | 6546(5) | 4618(10) | 1174(3) | 77.0(17) |
| C23  | 7803(5) | 4143(9)  | 1524(3) | 71.4(14) |

|     |            |            |            |          |
|-----|------------|------------|------------|----------|
| C24 | 8517(5)    | 5448(8)    | 2008(3)    | 64.9(13) |
| C25 | 5781(7)    | 3192(14)   | 618(4)     | 115(3)   |
| N1  | 7191(3)    | 7967(5)    | 7512.8(18) | 43.6(7)  |
| N2  | 9565(3)    | 7871(5)    | 3574(2)    | 48.9(8)  |
| O1  | 8321(3)    | 10173(5)   | 6741.9(16) | 51.1(7)  |
| O2  | 5795(4)    | 5503(6)    | 7887.7(19) | 77.4(11) |
| O3  | 4610(3)    | 6240(5)    | 6232.2(16) | 55.6(8)  |
| O4  | 6675(3)    | 4774(4)    | 6127.8(17) | 51.3(7)  |
| O5  | 7921(4)    | 10294(5)   | 3057(2)    | 75.7(10) |
| O6  | 9965(4)    | 9623(6)    | 2293(2)    | 83.5(12) |
| S1  | 8876.9(11) | 8950.7(16) | 2763.1(7)  | 58.0(3)  |

**Table 3 Anisotropic Displacement Parameters ( $\text{\AA}^2 \times 10^3$ ) for 3ba. The Anisotropic displacement factor exponent takes the form:  $-2\pi^2[h^2a^{*2}U_{11}+2hka^*b^*U_{12}+\dots]$ .**

| Atom | $U_{11}$ | $U_{22}$ | $U_{33}$ | $U_{23}$ | $U_{13}$ | $U_{12}$  |
|------|----------|----------|----------|----------|----------|-----------|
| C1   | 32.5(15) | 46(2)    | 37.4(16) | -3.1(16) | 5.0(12)  | -5.8(14)  |
| C2   | 49(2)    | 62(3)    | 43(2)    | 1.3(19)  | 4.4(16)  | -21.0(19) |
| C3   | 45.5(19) | 51(2)    | 38.2(18) | 0.9(16)  | 4.8(14)  | -16.5(17) |
| C4   | 34.8(16) | 43(2)    | 34.7(16) | -0.2(14) | 5.6(13)  | -7.3(14)  |
| C5   | 36.2(16) | 38(2)    | 36.7(16) | -2.1(14) | 1.3(12)  | -2.6(13)  |
| C6   | 37.6(17) | 43(2)    | 44.9(19) | 1.4(16)  | -3.0(14) | -7.3(15)  |
| C7   | 54(2)    | 36(2)    | 64(2)    | -0.3(18) | 5.4(18)  | 2.2(17)   |
| C8   | 43.4(18) | 43(2)    | 58(2)    | -7.9(18) | 6.2(16)  | 6.4(16)   |
| C9   | 35.6(16) | 47(2)    | 42.2(18) | -0.2(16) | 3.8(14)  | 2.3(14)   |
| C10  | 39.0(17) | 37(2)    | 42.4(17) | 0.8(15)  | 4.4(13)  | -1.2(14)  |
| C11  | 41.3(18) | 51(2)    | 43.4(18) | 3.2(16)  | 4.6(15)  | -1.1(15)  |
| C12  | 50(2)    | 66(3)    | 52(2)    | -3(2)    | 10.4(17) | 6.9(18)   |
| C13  | 36.3(17) | 59(3)    | 36.9(18) | -2.8(16) | 3.3(13)  | -6.8(15)  |

|     |          |          |          |          |          |           |
|-----|----------|----------|----------|----------|----------|-----------|
| C14 | 53(2)    | 60(3)    | 49(2)    | 2.5(19)  | -0.5(17) | -6.1(19)  |
| C15 | 69(3)    | 80(4)    | 57(3)    | -19(2)   | 3(2)     | -11(2)    |
| C16 | 63(3)    | 109(5)   | 43(2)    | -11(3)   | -2.2(19) | -10(3)    |
| C17 | 57(2)    | 97(4)    | 46(2)    | 12(2)    | -2.3(18) | 3(2)      |
| C18 | 52(2)    | 68(3)    | 45(2)    | 4(2)     | 1.5(17)  | 1.4(19)   |
| C19 | 54(2)    | 71(3)    | 43(2)    | 12.6(19) | 14.6(17) | 20(2)     |
| C20 | 64(3)    | 96(4)    | 58(3)    | 17(3)    | 18(2)    | 39(3)     |
| C21 | 51(3)    | 150(6)   | 56(3)    | 12(3)    | 7(2)     | 29(3)     |
| C22 | 59(3)    | 129(6)   | 44(2)    | 6(3)     | 11.6(19) | -1(3)     |
| C23 | 74(3)    | 86(4)    | 54(3)    | 2(3)     | 4(2)     | 15(3)     |
| C24 | 59(3)    | 84(4)    | 51(2)    | 6(2)     | 1.8(19)  | 24(2)     |
| C25 | 78(4)    | 186(9)   | 80(4)    | -15(5)   | 5(3)     | -24(5)    |
| N1  | 42.9(15) | 52(2)    | 36.0(15) | -0.4(14) | 1.1(12)  | -11.7(14) |
| N2  | 41.9(17) | 54(2)    | 51.6(18) | -0.6(15) | 15.7(13) | 8.1(14)   |
| O1  | 47.4(14) | 57.0(19) | 49.6(14) | -2.3(13) | 9.1(11)  | -21.2(13) |
| O2  | 91(2)    | 95(3)    | 46.2(16) | 12.7(16) | 5.2(15)  | -55(2)    |
| O3  | 43.8(14) | 77(2)    | 46.6(15) | -2.2(14) | 4.1(11)  | -23.4(13) |
| O4  | 59.6(16) | 43.0(16) | 52.0(14) | 6.4(12)  | 8.6(12)  | -11.5(12) |
| O5  | 92(2)    | 60(2)    | 76(2)    | 12.4(17) | 26.4(18) | 28.3(18)  |
| O6  | 96(3)    | 80(3)    | 77(2)    | 14.7(19) | 43(2)    | 0(2)      |
| S1  | 64.4(6)  | 55.6(7)  | 55.8(6)  | 13.1(5)  | 25.9(5)  | 17.5(5)   |

**Table 4 Bond Lengths for 3ba.**

| Atom | Atom | Length/Å | Atom | Atom | Length/Å |
|------|------|----------|------|------|----------|
| C1   | C4   | 1.523(5) | C11  | C12  | 1.526(5) |
| C1   | N1   | 1.393(4) | C13  | C14  | 1.373(6) |
| C1   | O1   | 1.204(4) | C13  | C18  | 1.378(6) |
| C2   | C3   | 1.535(5) | C13  | N1   | 1.450(5) |

|    |     |          |     |     |          |
|----|-----|----------|-----|-----|----------|
| C2 | N1  | 1.388(5) | C14 | C15 | 1.387(6) |
| C2 | O2  | 1.191(5) | C15 | C16 | 1.367(8) |
| C3 | C4  | 1.547(5) | C16 | C17 | 1.383(8) |
| C3 | O3  | 1.369(4) | C17 | C18 | 1.390(6) |
| C3 | O4  | 1.438(5) | C19 | C20 | 1.386(6) |
| C4 | C5  | 1.518(5) | C19 | C24 | 1.386(7) |
| C4 | C11 | 1.529(5) | C19 | S1  | 1.760(5) |
| C5 | C6  | 1.368(5) | C20 | C21 | 1.383(9) |
| C5 | C10 | 1.387(5) | C21 | C22 | 1.369(9) |
| C6 | C7  | 1.374(6) | C22 | C23 | 1.395(7) |
| C6 | O4  | 1.384(4) | C22 | C25 | 1.521(9) |
| C7 | C8  | 1.394(6) | C23 | C24 | 1.378(8) |
| C8 | C9  | 1.385(6) | N2  | S1  | 1.630(4) |
| C9 | C10 | 1.391(5) | O5  | S1  | 1.432(3) |
| C9 | N2  | 1.432(5) | O6  | S1  | 1.427(3) |

**Table 5 Bond Angles for 3ba.**

| Atom | Atom | Atom | Angle/°  | Atom | Atom | Atom | Angle/°  |
|------|------|------|----------|------|------|------|----------|
| N1   | C1   | C4   | 109.5(3) | C12  | C11  | C4   | 114.7(3) |
| O1   | C1   | C4   | 125.9(3) | C14  | C13  | C18  | 121.5(4) |
| O1   | C1   | N1   | 124.5(3) | C14  | C13  | N1   | 119.7(4) |
| N1   | C2   | C3   | 107.6(3) | C18  | C13  | N1   | 118.8(4) |
| O2   | C2   | C3   | 125.3(4) | C13  | C14  | C15  | 118.8(5) |
| O2   | C2   | N1   | 127.1(4) | C16  | C15  | C14  | 121.0(5) |
| C2   | C3   | C4   | 105.3(3) | C15  | C16  | C17  | 119.6(4) |
| O3   | C3   | C2   | 113.3(3) | C16  | C17  | C18  | 120.4(5) |
| O3   | C3   | C4   | 113.1(3) | C13  | C18  | C17  | 118.7(5) |
| O3   | C3   | O4   | 111.2(3) | C20  | C19  | C24  | 120.1(5) |

|     |     |     |          |     |     |     |            |
|-----|-----|-----|----------|-----|-----|-----|------------|
| O4  | C3  | C2  | 106.5(3) | C20 | C19 | S1  | 118.6(4)   |
| O4  | C3  | C4  | 107.0(3) | C24 | C19 | S1  | 121.3(3)   |
| C1  | C4  | C3  | 102.9(3) | C21 | C20 | C19 | 118.7(5)   |
| C1  | C4  | C11 | 109.6(3) | C22 | C21 | C20 | 122.3(5)   |
| C5  | C4  | C1  | 110.7(3) | C21 | C22 | C23 | 118.4(6)   |
| C5  | C4  | C3  | 101.3(3) | C21 | C22 | C25 | 121.4(6)   |
| C5  | C4  | C11 | 115.3(3) | C23 | C22 | C25 | 120.1(6)   |
| C11 | C4  | C3  | 116.1(3) | C24 | C23 | C22 | 120.4(5)   |
| C6  | C5  | C4  | 108.6(3) | C23 | C24 | C19 | 120.1(4)   |
| C6  | C5  | C10 | 120.8(3) | C1  | N1  | C13 | 123.6(3)   |
| C10 | C5  | C4  | 130.6(3) | C2  | N1  | C1  | 112.8(3)   |
| C5  | C6  | C7  | 122.6(4) | C2  | N1  | C13 | 123.5(3)   |
| C5  | C6  | O4  | 113.0(3) | C9  | N2  | S1  | 122.6(3)   |
| C7  | C6  | O4  | 124.4(4) | C6  | O4  | C3  | 107.8(3)   |
| C6  | C7  | C8  | 117.1(4) | N2  | S1  | C19 | 108.0(2)   |
| C9  | C8  | C7  | 121.0(3) | O5  | S1  | C19 | 107.1(2)   |
| C8  | C9  | C10 | 120.9(3) | O5  | S1  | N2  | 107.91(19) |
| C8  | C9  | N2  | 119.8(3) | O6  | S1  | C19 | 108.5(2)   |
| C10 | C9  | N2  | 119.3(4) | O6  | S1  | N2  | 105.5(2)   |
| C5  | C10 | C9  | 117.7(4) | O6  | S1  | O5  | 119.4(2)   |

**Table 6 Hydrogen Bonds for 3ba.**

| D  | H  | A               | d(D-H)/Å | d(H-A)/Å | d(D-A)/Å | D-H-A/° |
|----|----|-----------------|----------|----------|----------|---------|
| N2 | H2 | O1 <sup>1</sup> | 0.84(2)  | 2.07(3)  | 2.892(4) | 167(4)  |
| O3 | H3 | O5 <sup>2</sup> | 0.82     | 2.30     | 2.892(4) | 129.8   |

<sup>1</sup>2-X,-1/2+Y,1-Z; <sup>2</sup>1-X,-1/2+Y,1-Z



**Table 7 Torsion Angles for 3ba.**

| <b>A</b> | <b>B</b> | <b>C</b> | <b>D</b> | <b>Angle/°</b> | <b>A</b> | <b>B</b> | <b>C</b> | <b>D</b> | <b>Angle/°</b> |
|----------|----------|----------|----------|----------------|----------|----------|----------|----------|----------------|
| C1       | C4       | C5       | C6       | 99.1(4)        | C18      | C13      | N1       | C2       | 43.4(5)        |
| C1       | C4       | C5       | C10      | -80.0(5)       | C19      | C20      | C21      | C22      | -0.1(8)        |
| C1       | C4       | C11      | C12      | -51.2(4)       | C20      | C19      | C24      | C23      | -0.3(7)        |
| C2       | C3       | C4       | C1       | 13.0(4)        | C20      | C19      | S1       | N2       | 137.9(3)       |
| C2       | C3       | C4       | C5       | 127.6(3)       | C20      | C19      | S1       | O5       | 21.9(4)        |
| C2       | C3       | C4       | C11      | -106.7(4)      | C20      | C19      | S1       | O6       | -108.2(4)      |
| C2       | C3       | O4       | C6       | -127.1(3)      | C20      | C21      | C22      | C23      | 0.9(8)         |
| C3       | C2       | N1       | C1       | 2.6(5)         | C20      | C21      | C22      | C25      | -178.6(5)      |
| C3       | C2       | N1       | C13      | 179.2(4)       | C21      | C22      | C23      | C24      | -1.4(7)        |
| C3       | C4       | C5       | C6       | -9.5(4)        | C22      | C23      | C24      | C19      | 1.1(7)         |
| C3       | C4       | C5       | C10      | 171.5(4)       | C24      | C19      | C20      | C21      | -0.3(7)        |
| C3       | C4       | C11      | C12      | 64.9(4)        | C24      | C19      | S1       | N2       | -43.4(4)       |
| C4       | C1       | N1       | C2       | 6.4(5)         | C24      | C19      | S1       | O5       | -159.4(4)      |
| C4       | C1       | N1       | C13      | -170.3(3)      | C24      | C19      | S1       | O6       | 70.4(4)        |
| C4       | C3       | O4       | C6       | -14.9(3)       | C25      | C22      | C23      | C24      | 178.1(5)       |
| C4       | C5       | C6       | C7       | -179.1(3)      | N1       | C1       | C4       | C3       | -12.1(4)       |
| C4       | C5       | C6       | O4       | 0.8(4)         | N1       | C1       | C4       | C5       | -119.6(3)      |
| C4       | C5       | C10      | C9       | 179.8(3)       | N1       | C1       | C4       | C11      | 112.0(3)       |
| C5       | C4       | C11      | C12      | -176.9(3)      | N1       | C2       | C3       | C4       | -10.1(5)       |
| C5       | C6       | C7       | C8       | -1.5(6)        | N1       | C2       | C3       | O3       | -134.2(4)      |
| C5       | C6       | O4       | C3       | 9.1(4)         | N1       | C2       | C3       | O4       | 103.3(4)       |
| C6       | C5       | C10      | C9       | 0.8(5)         | N1       | C13      | C14      | C15      | 178.3(4)       |
| C6       | C7       | C8       | C9       | 2.0(6)         | N1       | C13      | C18      | C17      | -176.9(4)      |
| C7       | C6       | O4       | C3       | -171.0(3)      | N2       | C9       | C10      | C5       | -177.9(3)      |
| C7       | C8       | C9       | C10      | -1.2(6)        | O1       | C1       | C4       | C3       | 169.8(4)       |
| C7       | C8       | C9       | N2       | 176.4(3)       | O1       | C1       | C4       | C5       | 62.3(5)        |

|     |     |     |     |           |    |     |     |     |           |
|-----|-----|-----|-----|-----------|----|-----|-----|-----|-----------|
| C8  | C9  | C10 | C5  | -0.2(5)   | O1 | C1  | C4  | C11 | -66.0(5)  |
| C8  | C9  | N2  | S1  | 111.9(4)  | O1 | C1  | N1  | C2  | -175.6(4) |
| C9  | N2  | S1  | C19 | -65.4(4)  | O1 | C1  | N1  | C13 | 7.8(6)    |
| C9  | N2  | S1  | O5  | 50.1(4)   | O2 | C2  | C3  | C4  | 169.3(5)  |
| C9  | N2  | S1  | O6  | 178.7(3)  | O2 | C2  | C3  | O3  | 45.2(7)   |
| C10 | C5  | C6  | C7  | 0.1(6)    | O2 | C2  | C3  | O4  | -77.3(6)  |
| C10 | C5  | C6  | O4  | -180.0(3) | O2 | C2  | N1  | C1  | -176.8(5) |
| C10 | C9  | N2  | S1  | -70.5(5)  | O2 | C2  | N1  | C13 | -0.2(8)   |
| C11 | C4  | C5  | C6  | -135.7(3) | O3 | C3  | C4  | C1  | 137.3(3)  |
| C11 | C4  | C5  | C10 | 45.2(5)   | O3 | C3  | C4  | C5  | -108.2(3) |
| C13 | C14 | C15 | C16 | -1.7(7)   | O3 | C3  | C4  | C11 | 17.5(5)   |
| C14 | C13 | C18 | C17 | 1.5(6)    | O3 | C3  | O4  | C6  | 109.0(3)  |
| C14 | C13 | N1  | C1  | 41.2(5)   | O4 | C3  | C4  | C1  | -100.0(3) |
| C14 | C13 | N1  | C2  | -135.0(4) | O4 | C3  | C4  | C5  | 14.5(3)   |
| C14 | C15 | C16 | C17 | 2.0(8)    | O4 | C3  | C4  | C11 | 140.3(3)  |
| C15 | C16 | C17 | C18 | -0.4(8)   | O4 | C6  | C7  | C8  | 178.6(3)  |
| C16 | C17 | C18 | C13 | -1.3(7)   | S1 | C19 | C20 | C21 | 178.4(4)  |
| C18 | C13 | C14 | C15 | 0.0(6)    | S1 | C19 | C24 | C23 | -178.9(4) |
| C18 | C13 | N1  | C1  | -140.4(4) |    |     |     |     |           |

**Table 8 Hydrogen Atom Coordinates ( $\text{\AA}\times 10^4$ ) and Isotropic Displacement Parameters ( $\text{\AA}^2\times 10^3$ ) for 3ba.**

| Atom | <i>x</i> | <i>y</i> | <i>z</i> | U(eq) |
|------|----------|----------|----------|-------|
| H7   | 8109     | 2883     | 5030     | 62    |
| H8   | 9228     | 4293     | 3933     | 58    |
| H10  | 8127     | 9529     | 4692     | 47    |
| H11A | 6125     | 10772    | 5496     | 54    |
| H11B | 4984     | 9256     | 5364     | 54    |

---

|      |           |          |          |        |
|------|-----------|----------|----------|--------|
| H12A | 5474      | 11316    | 6862     | 84     |
| H12B | 4357      | 9751     | 6753     | 84     |
| H12C | 4248      | 11654    | 6237     | 84     |
| H14  | 7542      | 11354    | 8167     | 65     |
| H15  | 8358      | 12180    | 9494     | 82     |
| H16  | 8916      | 9862     | 10460    | 86     |
| H17  | 8782      | 6671     | 10084    | 80     |
| H18  | 8055      | 5812     | 8738     | 66     |
| H20  | 6356      | 8912     | 1929     | 87     |
| H21  | 5190      | 6708     | 1113     | 103    |
| H23  | 8161      | 2937     | 1430     | 86     |
| H24  | 9361      | 5130     | 2232     | 78     |
| H25A | 4837      | 3404     | 657      | 172    |
| H25B | 5996      | 1914     | 798      | 172    |
| H25C | 6028      | 3357     | 50       | 172    |
| H2   | 10250(30) | 7250(60) | 3470(20) | 41(10) |
| H3   | 4265      | 5505     | 6560     | 83     |

---

# <sup>1</sup>H NMR and <sup>13</sup>C NMR spectra

## 3-Ethyl-4-hydroxy-1-(4-methoxyphenyl)-1H-pyrrole-2,5-dione (1a)

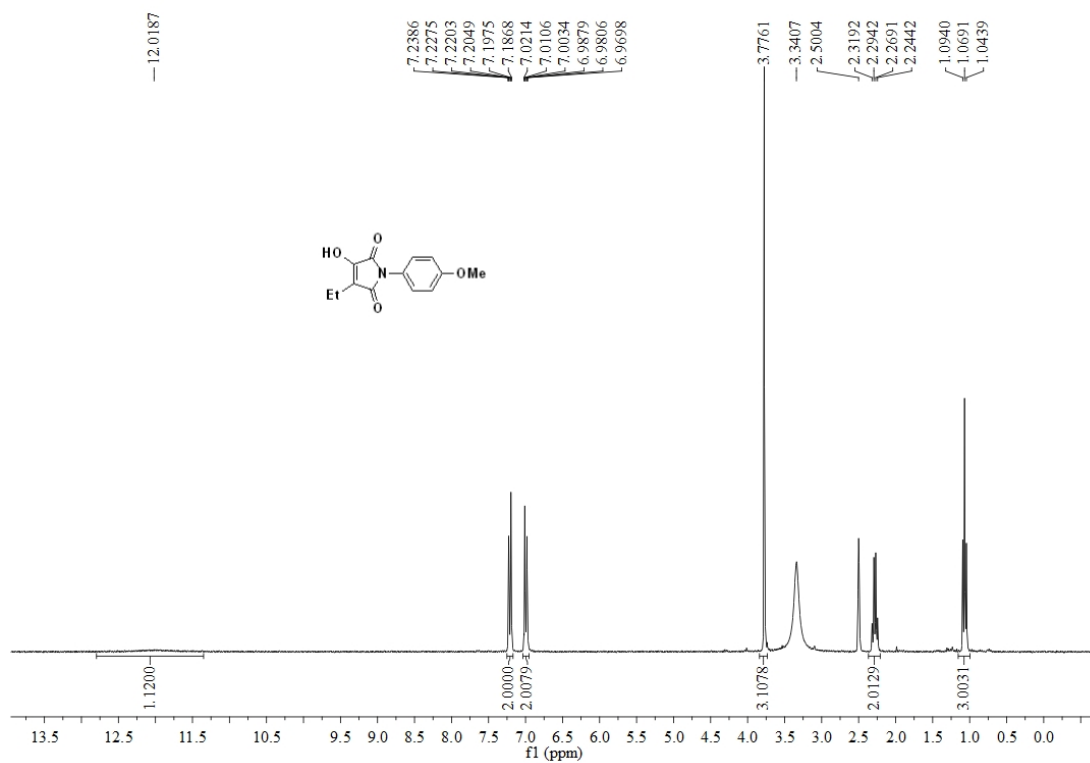

## 3-Ethyl-4-hydroxy-1-phenyl-1H-pyrrole-2,5-dione (1b)

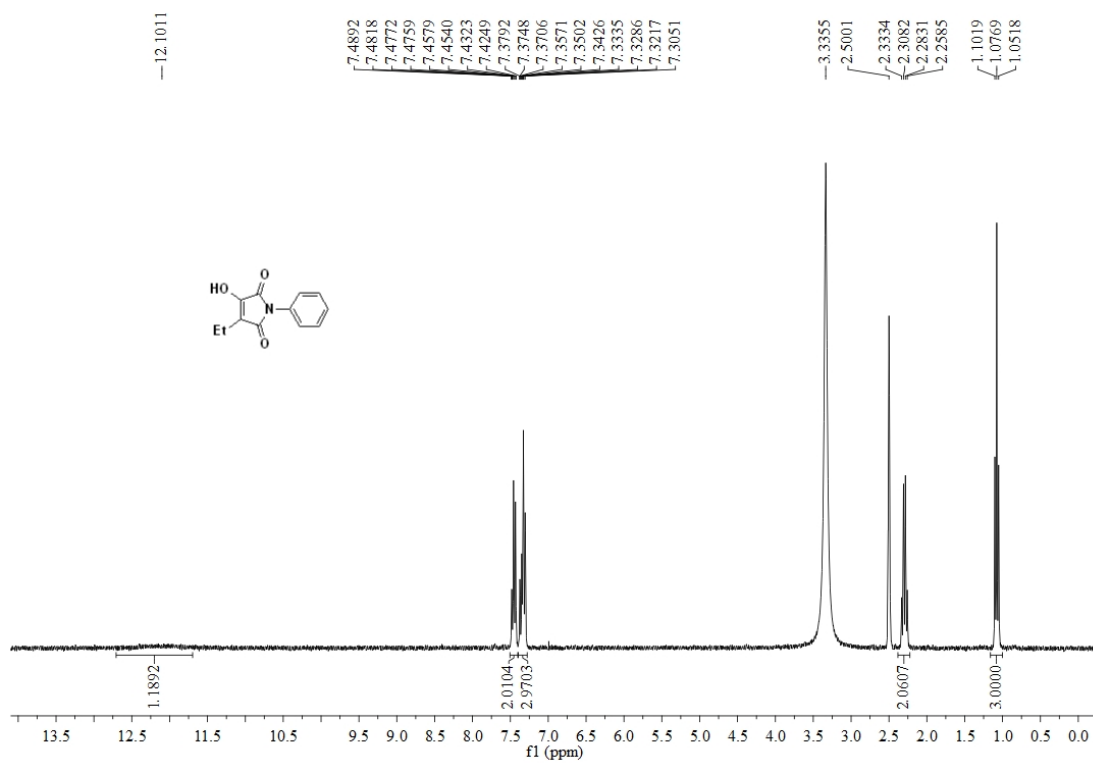

### 3-Ethyl-4-hydroxy-1-(p-tolyl)-1H-pyrrole-2,5-dione (1c)

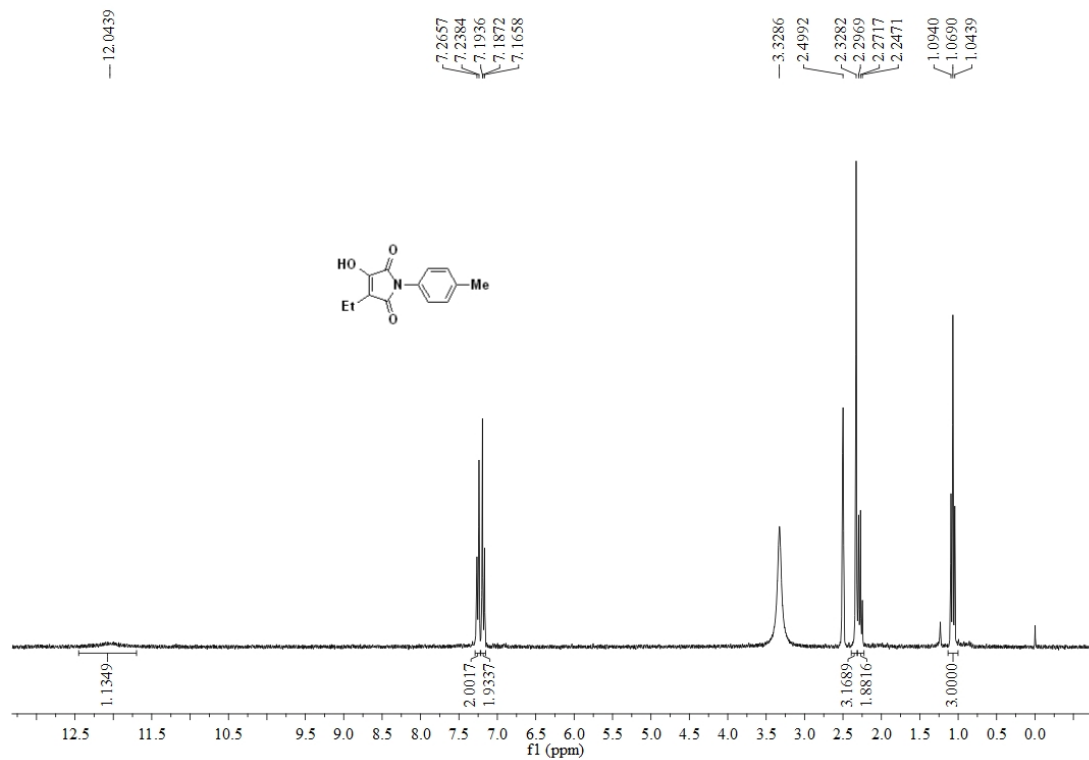

### 3-Ethyl-1-(4-ethylphenyl)-4-hydroxy-1H-pyrrole-2,5-dione (1d)

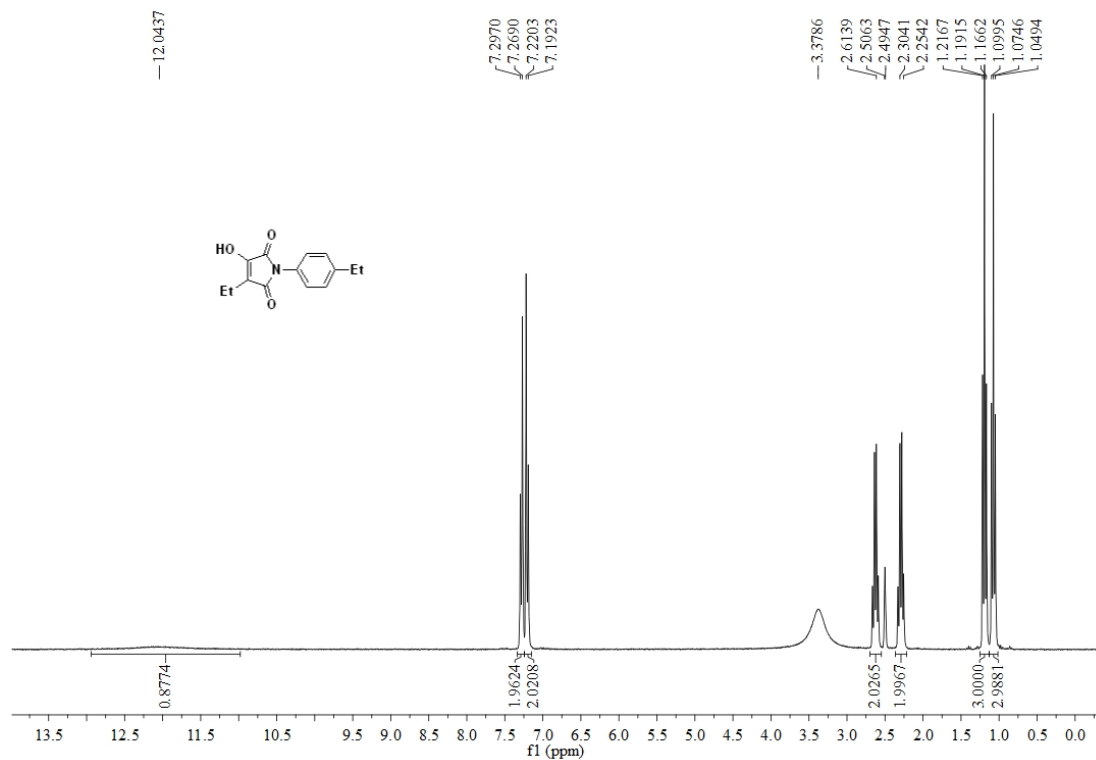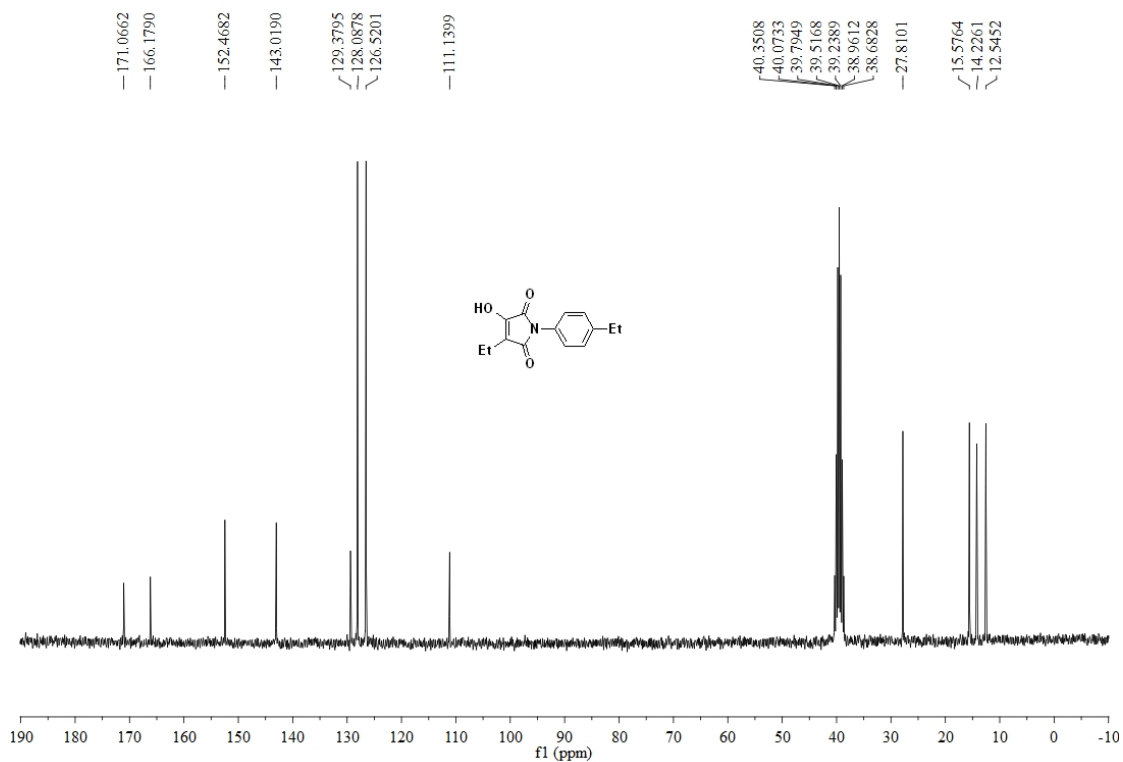

### 3-Ethyl-4-hydroxy-1-(4-isopropylphenyl)-1H-pyrrole-2,5-dione (1e)

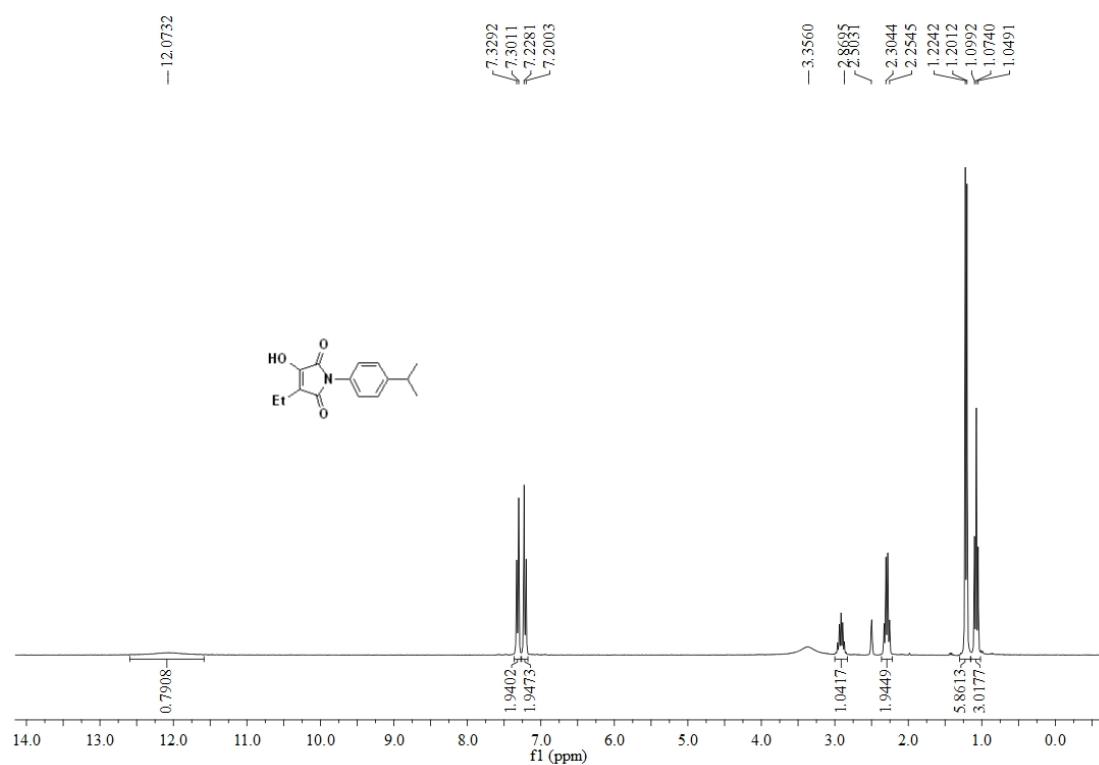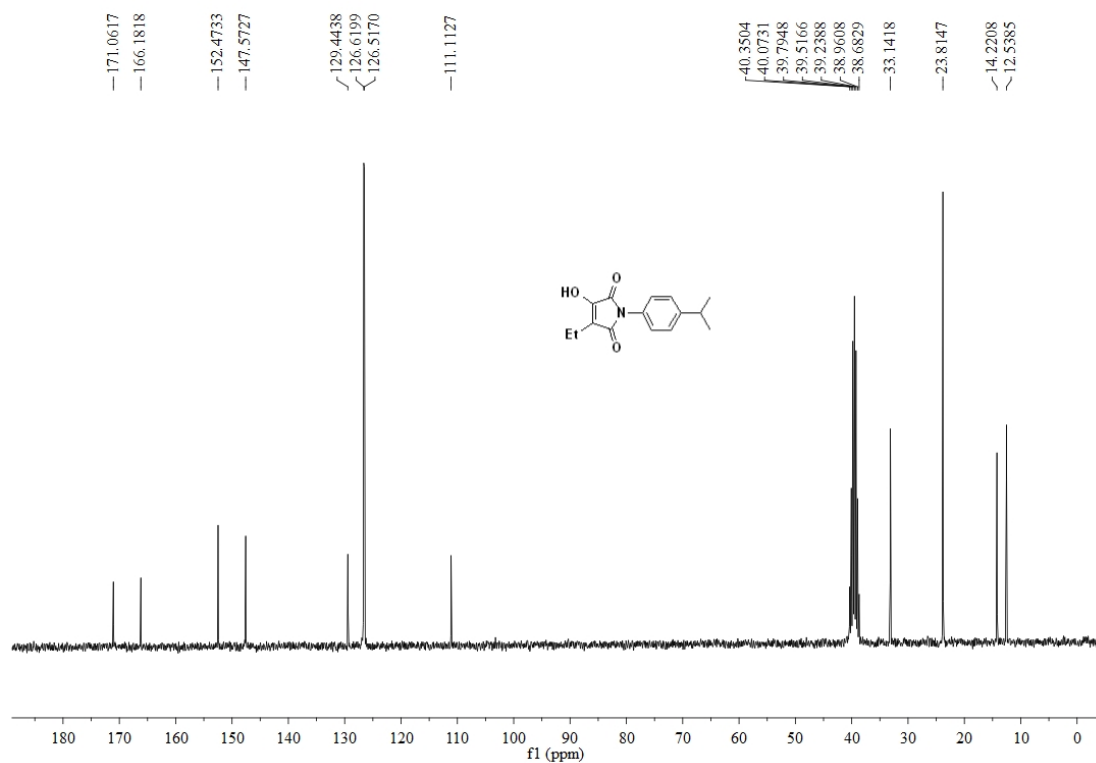

### 3-Ethyl-4-hydroxy-1-(4-phenoxyphenyl)-1H-pyrrole-2,5-dione (1f)

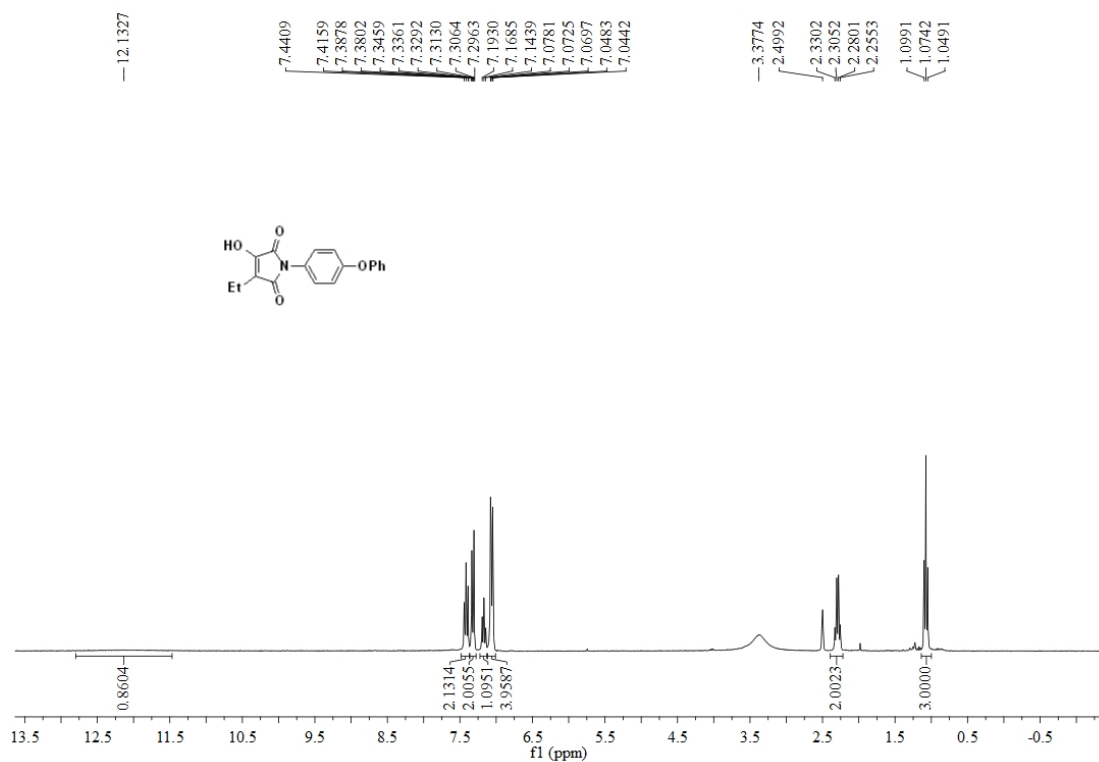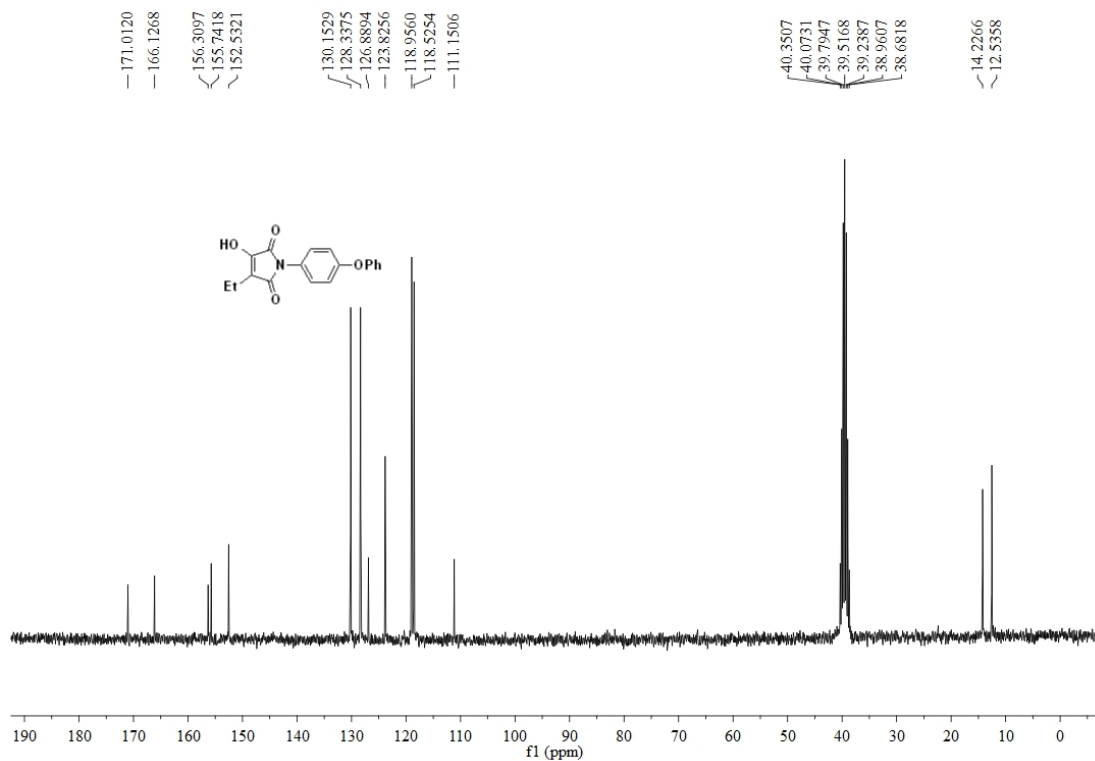



### 3-Ethyl-1-(4-fluorophenyl)-4-hydroxy-1H-pyrrole-2,5-dione (1g)

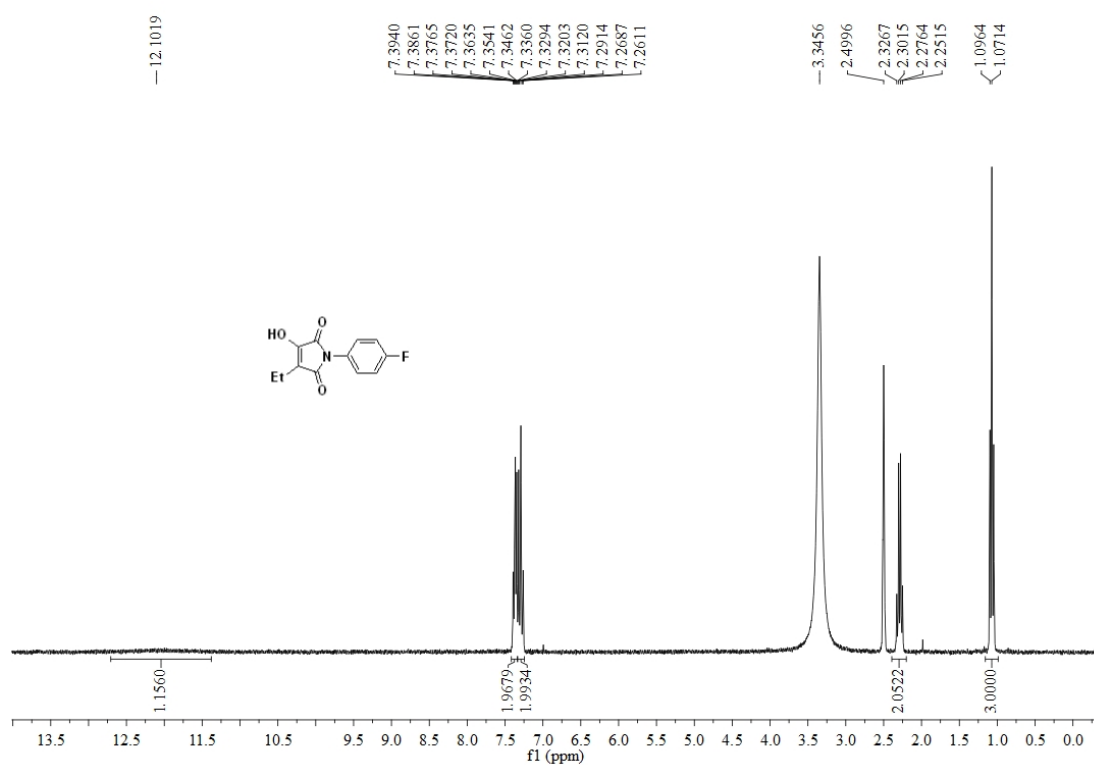

### 1-(4-Chlorophenyl)-3-ethyl-4-hydroxy-1H-pyrrole-2,5-dione (1h)

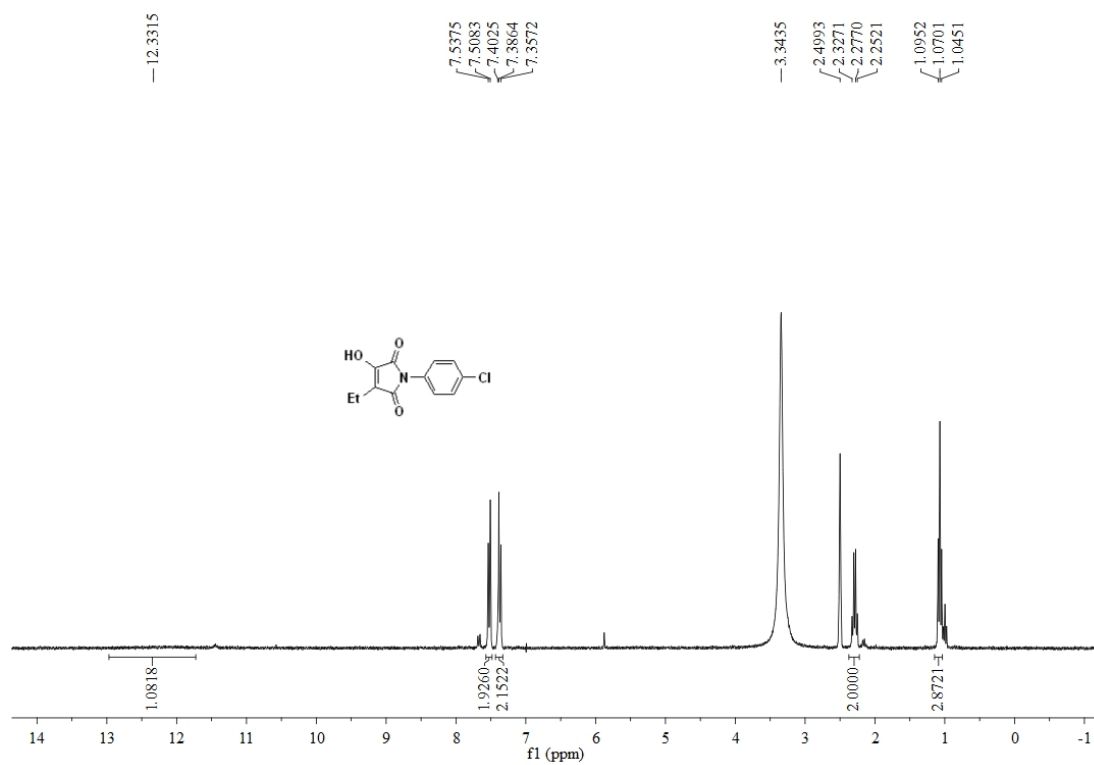

### 1-(4-Bromophenyl)-3-ethyl-4-hydroxy-1H-pyrrole-2,5-dione (1i)

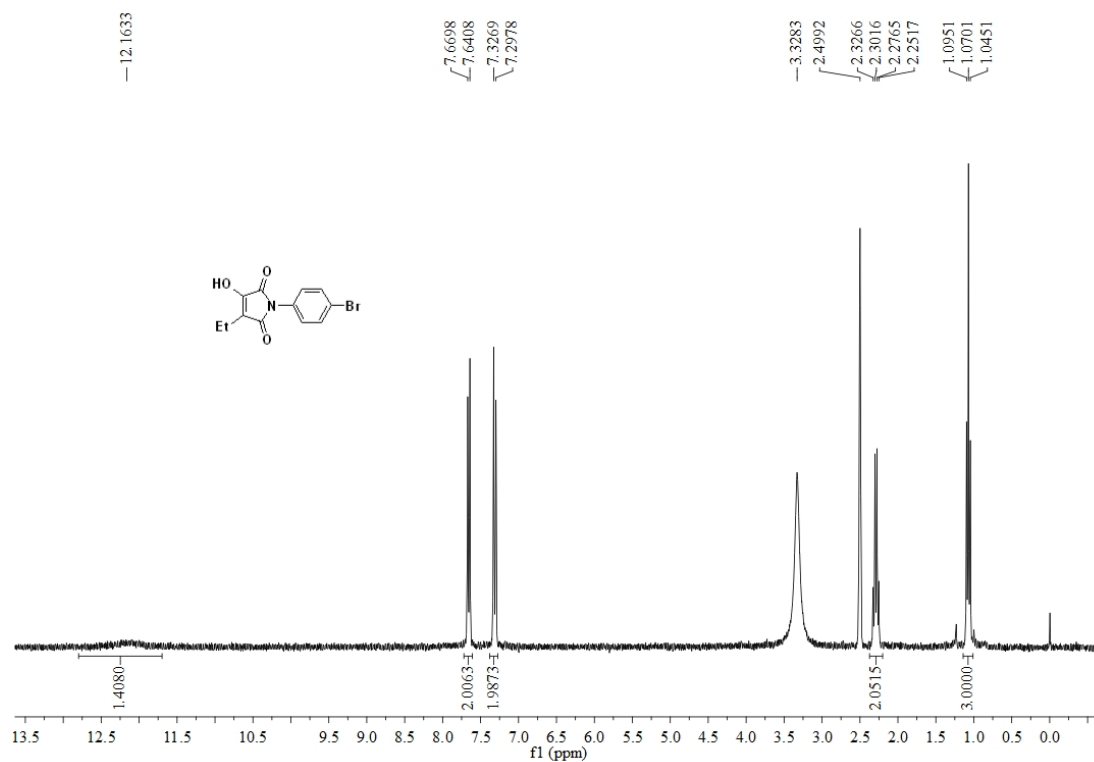

### 3-Ethyl-4-hydroxy-1-(3-methoxyphenyl)-1H-pyrrole-2,5-dione (1j)

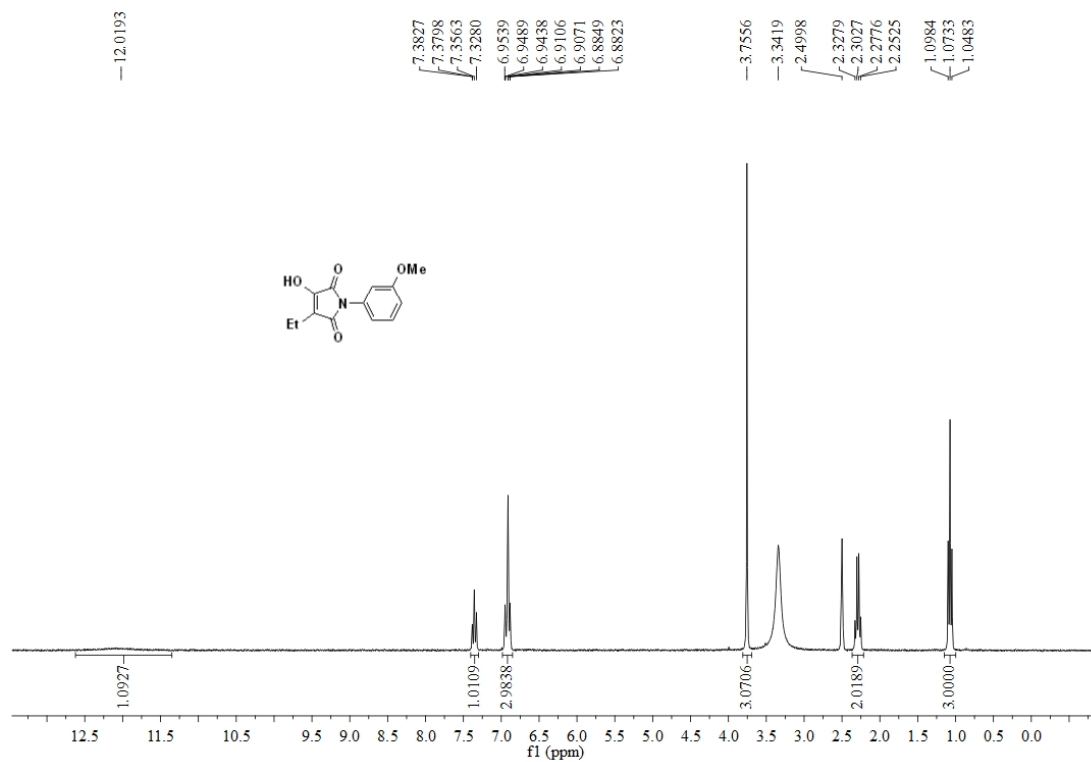

### 3-Ethyl-4-hydroxy-1-(m-tolyl)-1H-pyrrole-2,5-dione (1k)

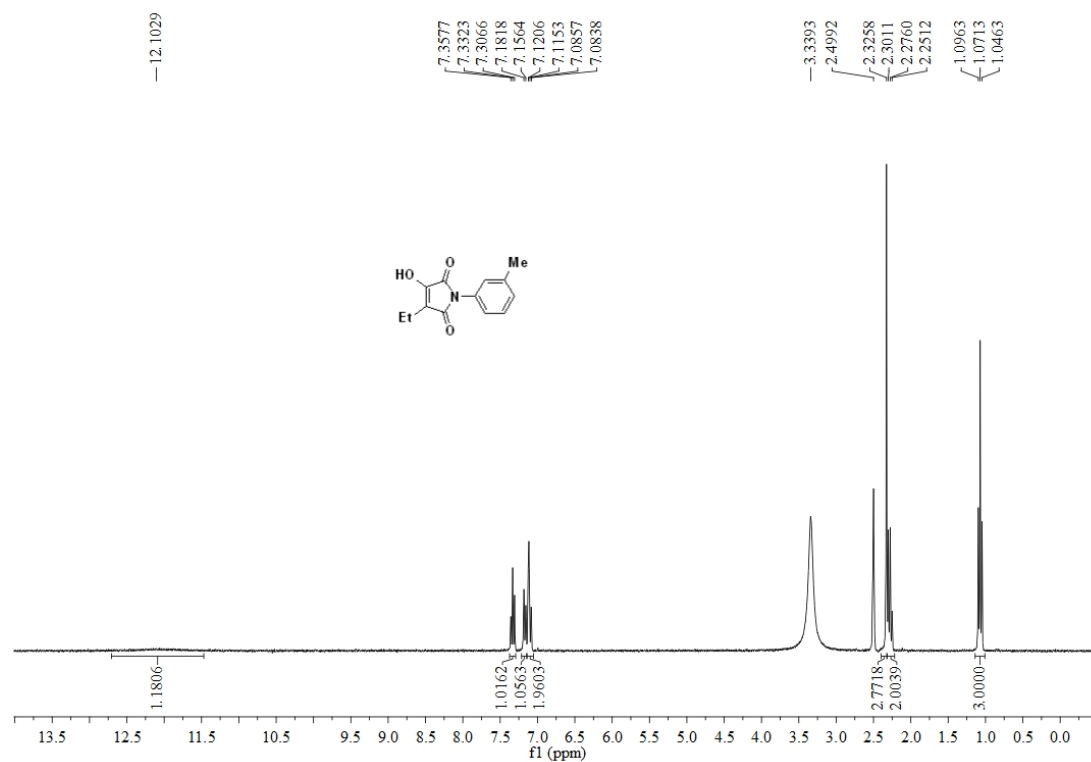

# 1-(3,5-Dimethoxyphenyl)-3-ethyl-4-hydroxy-1H-pyrrole-2,5-dione (11)

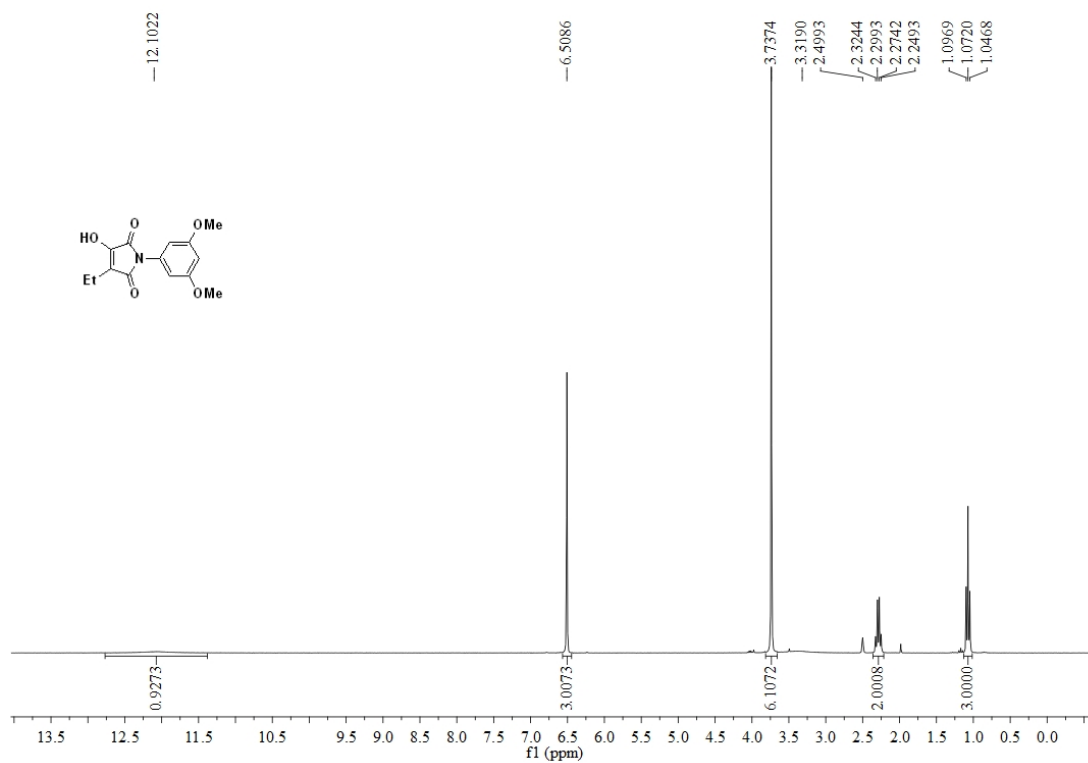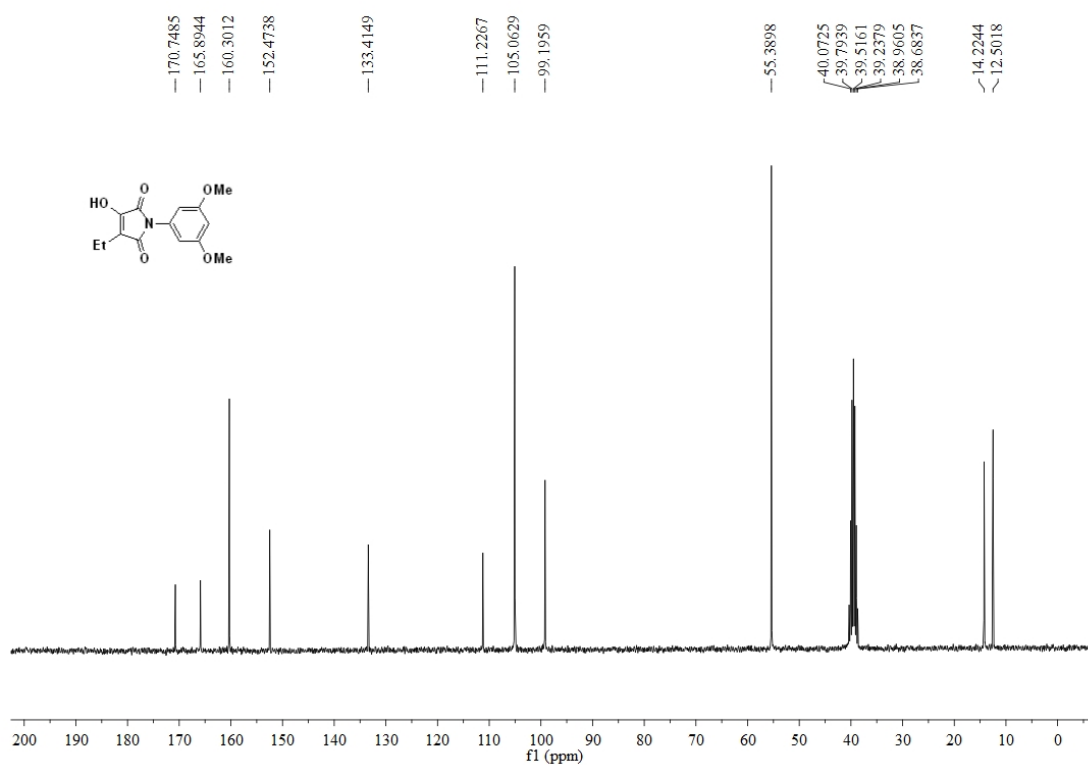

### 3-Ethyl-4-hydroxy-1-(naphthalen-2-yl)-1H-pyrrole-2,5-dione (1m):

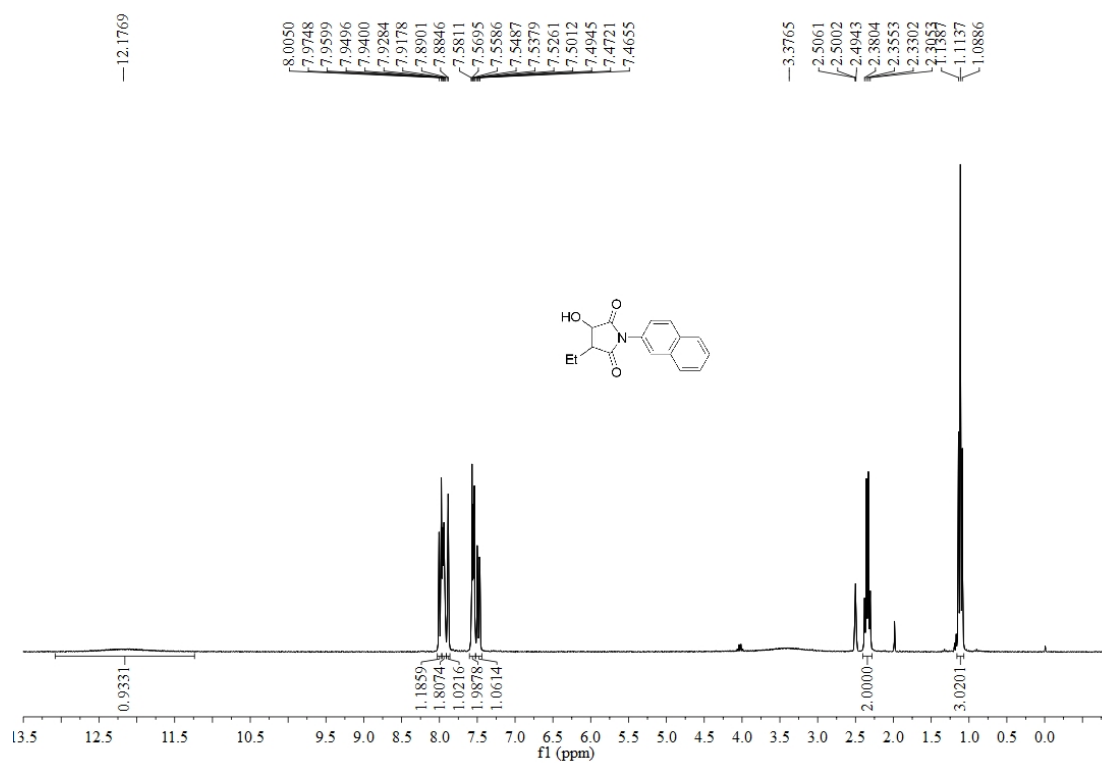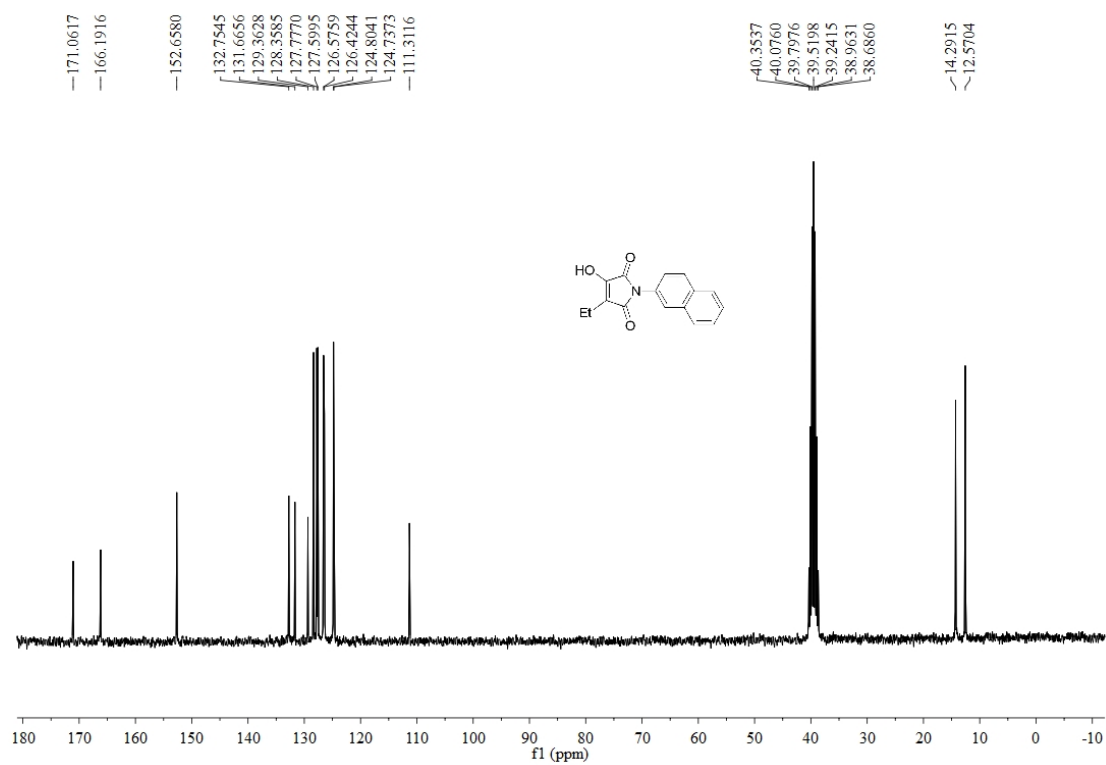

# 1-(Benzo[d][1,3]dioxol-5-yl)-3-ethyl-4-hydroxy-1H-pyrrole-2,5-dione (1n)

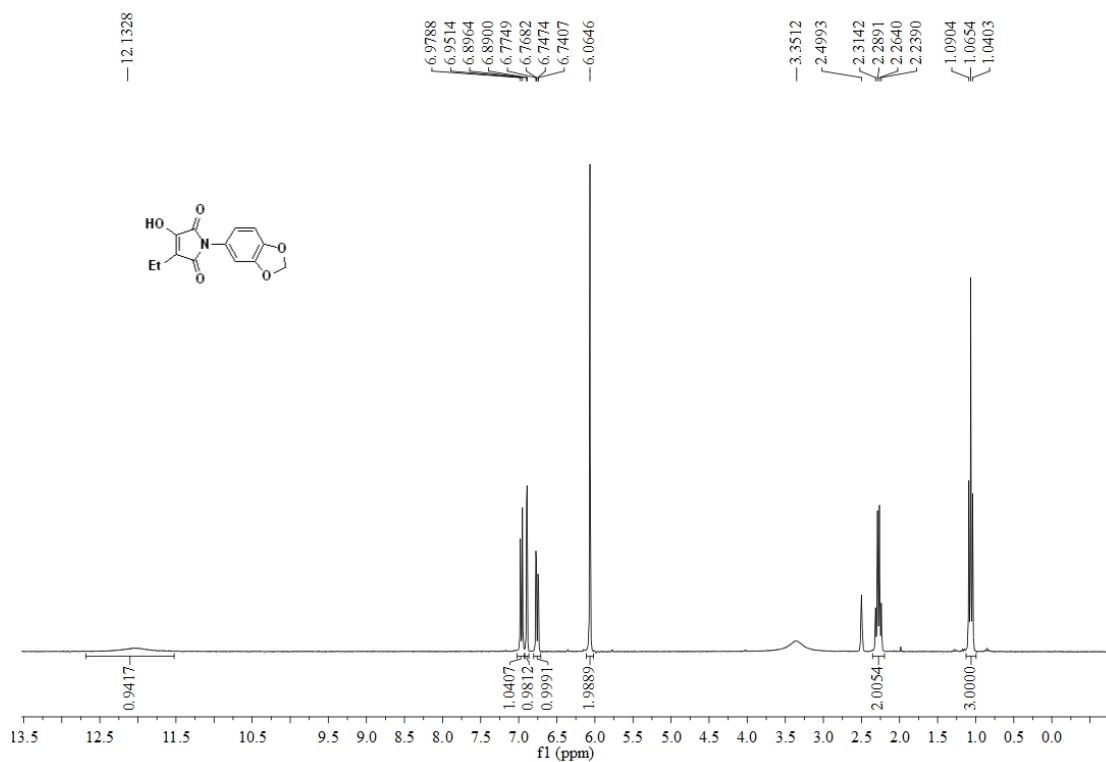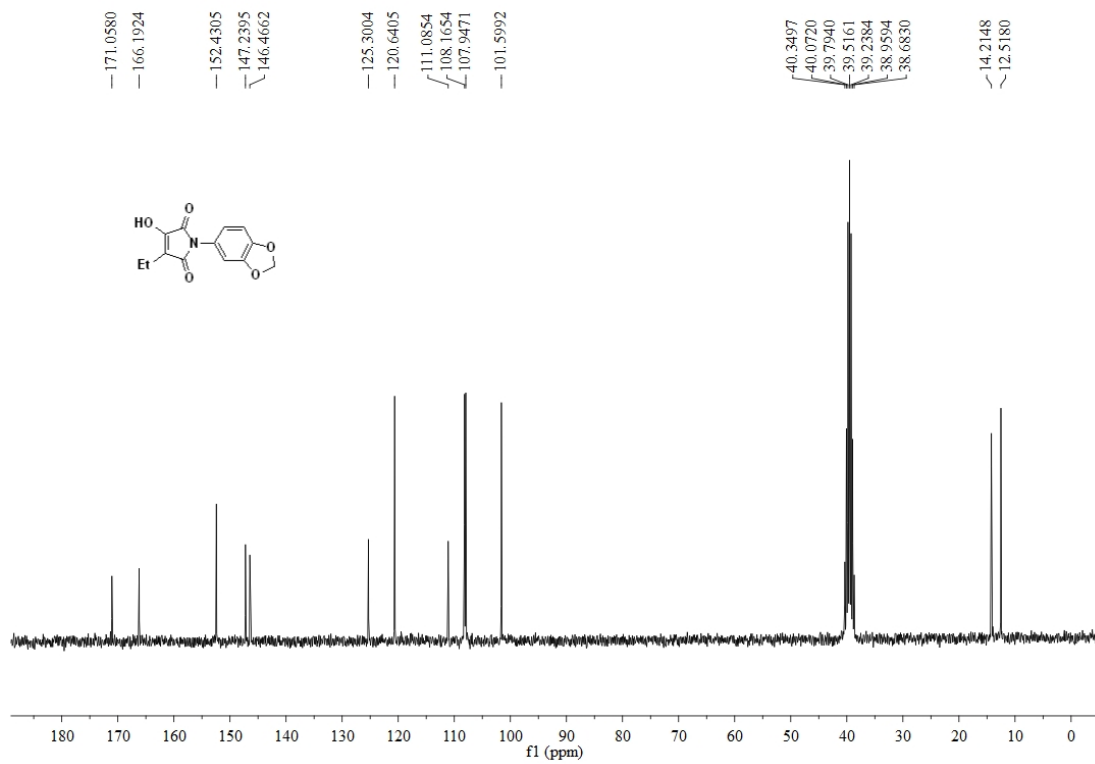

# 1-Benzyl-3-ethyl-4-hydroxy-1H-pyrrole-2,5-dione (1o)

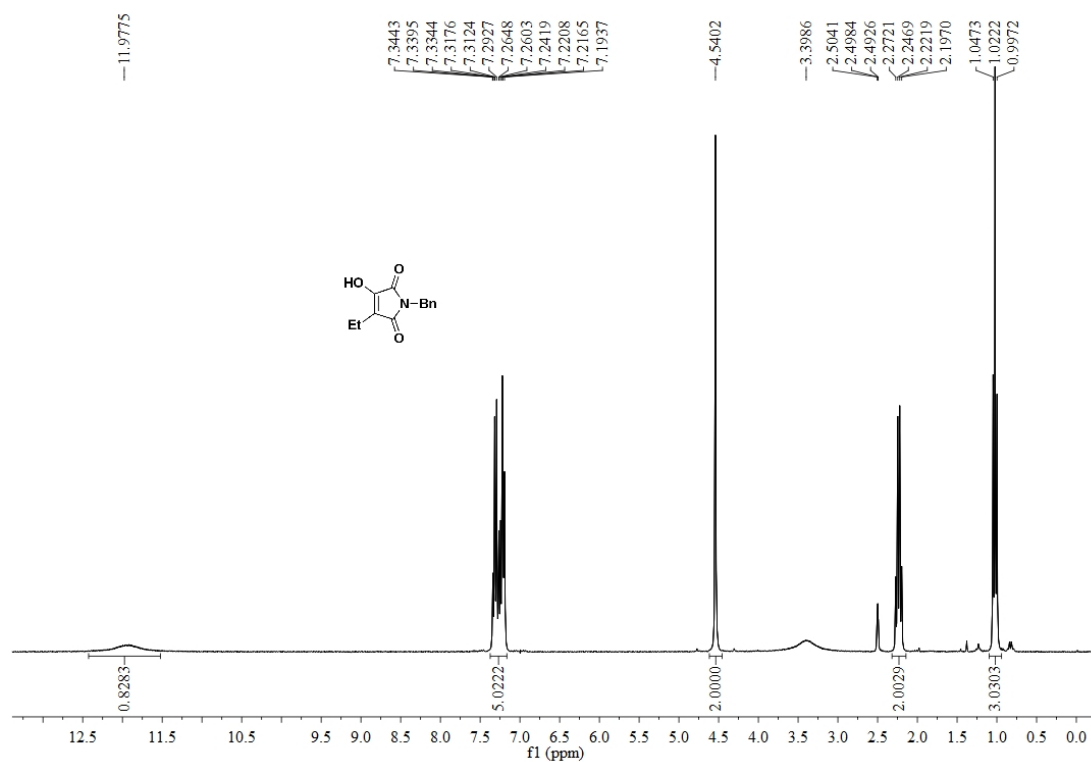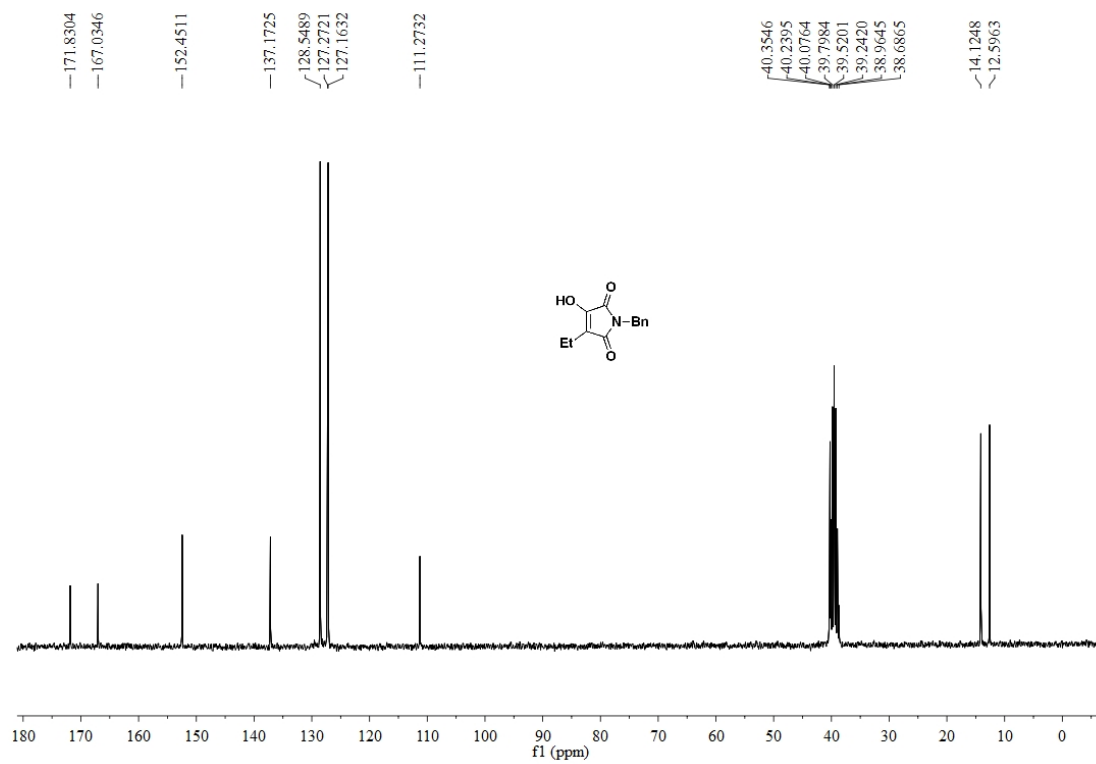

### 3-Ethyl-4-hydroxy-1H-pyrrole-2,5-dione (1p)

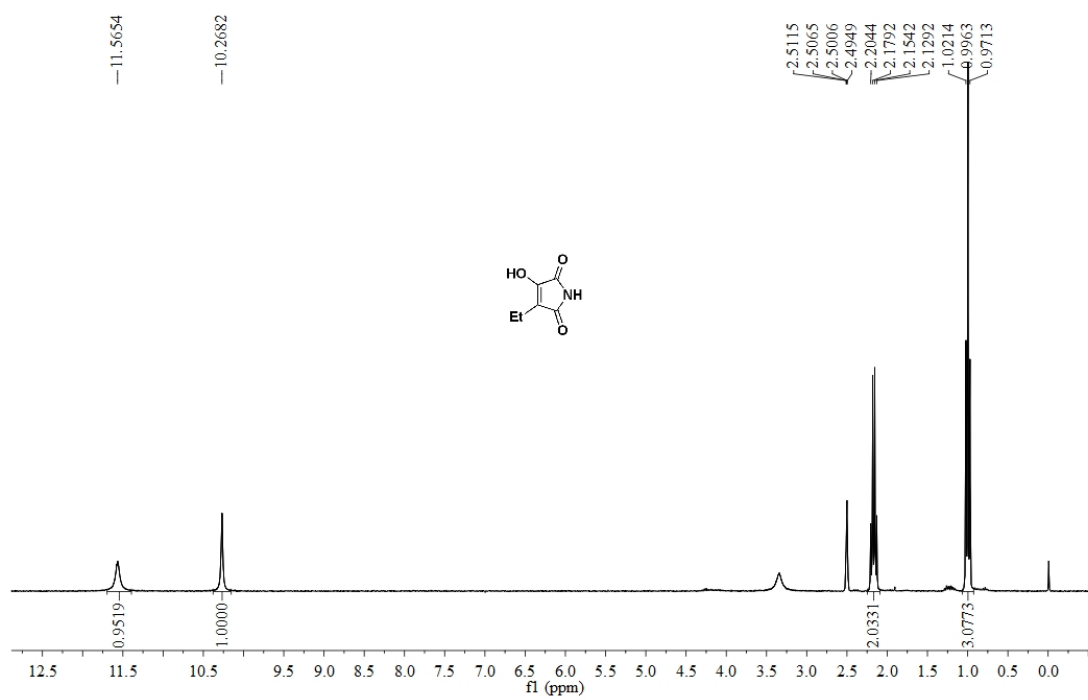



### 3-Hydroxy-1-(4-methoxyphenyl)-4-methyl-1H-pyrrole-2,5-dione (1q)

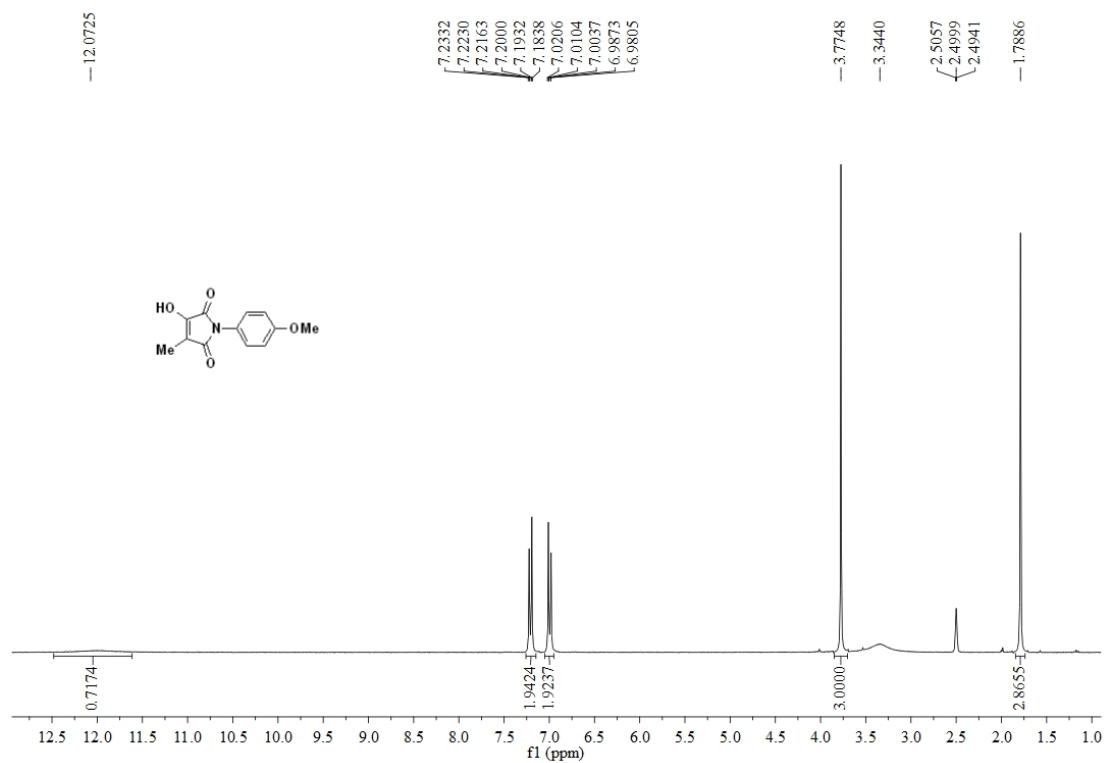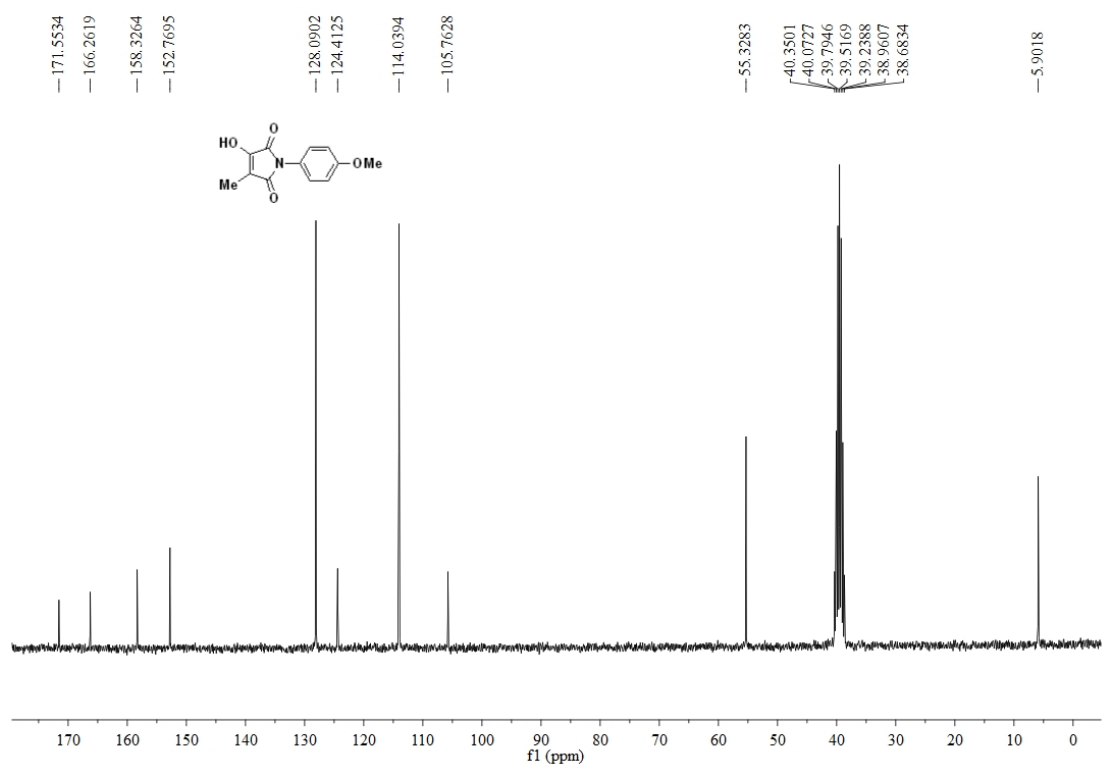

### 3-Hydroxy-1-(4-methoxyphenyl)-4-propyl-1*H*-pyrrole-2,5-dione (1r)

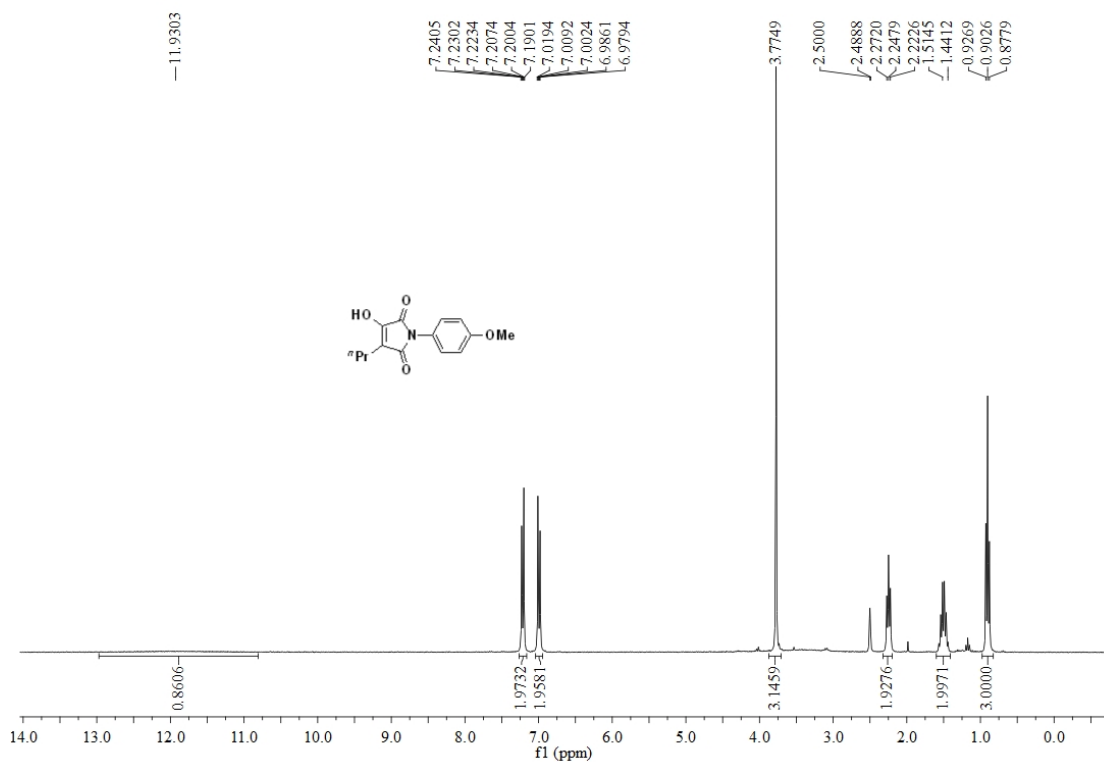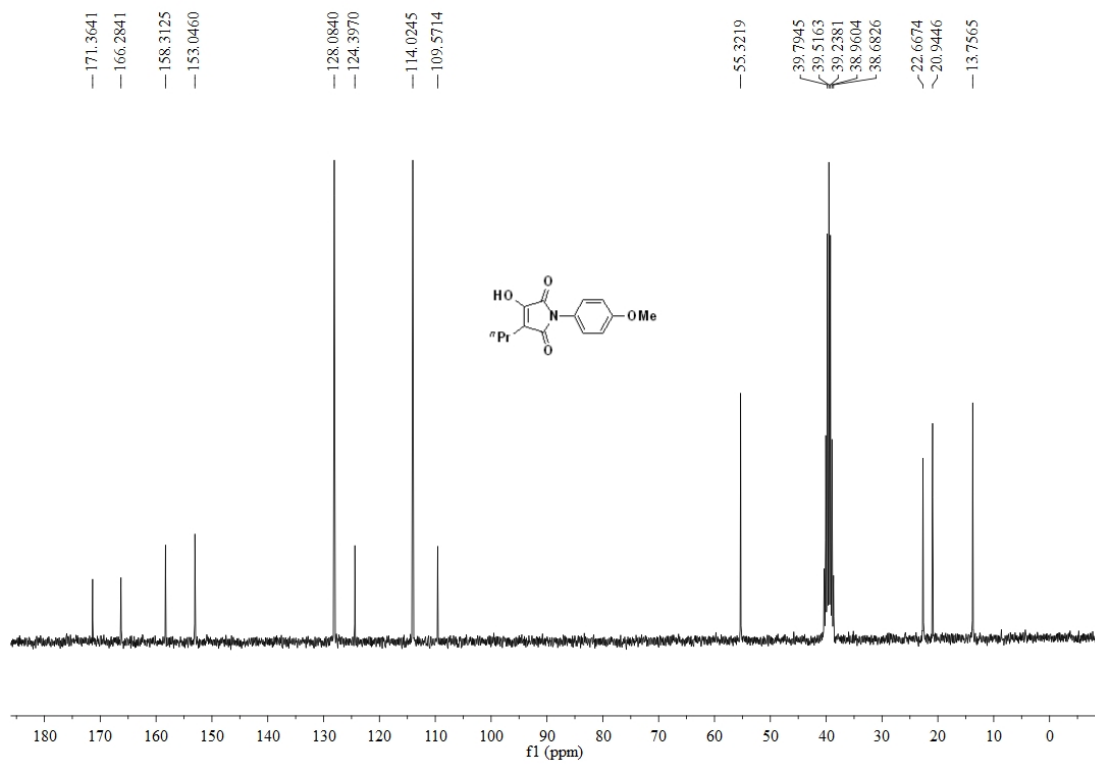

### 3-Benzyl-4-hydroxy-1-(4-methoxyphenyl)-1H-pyrrole-2,5-dione (1s)

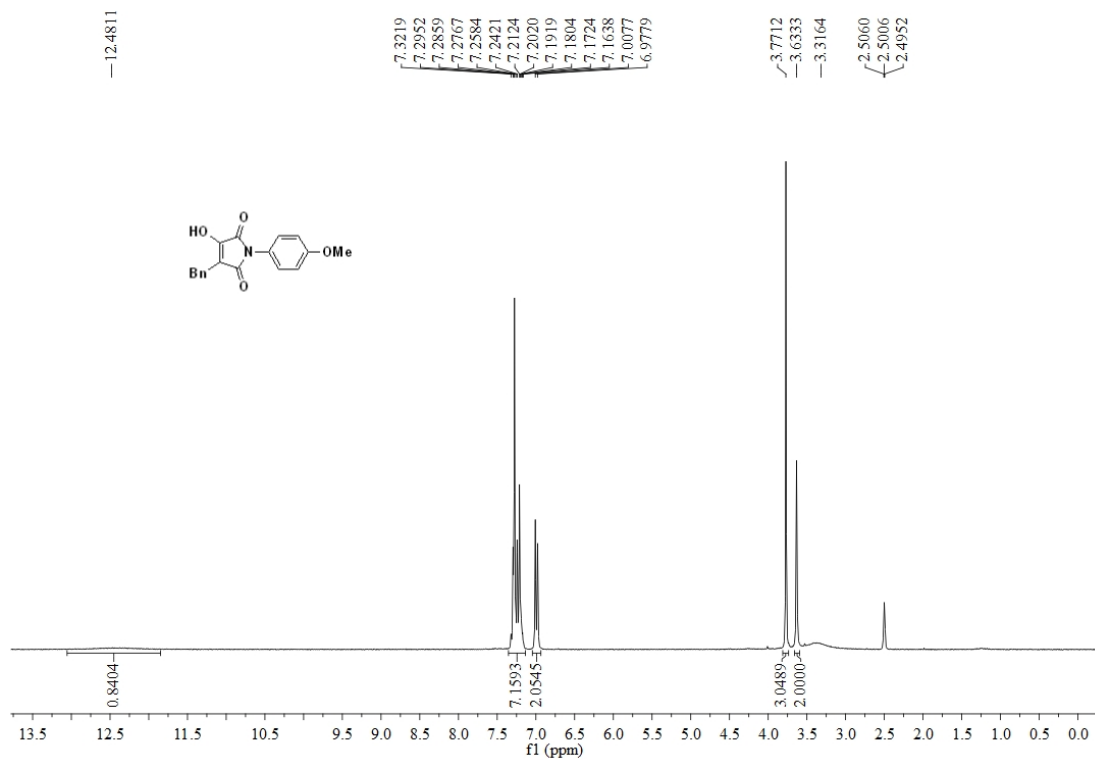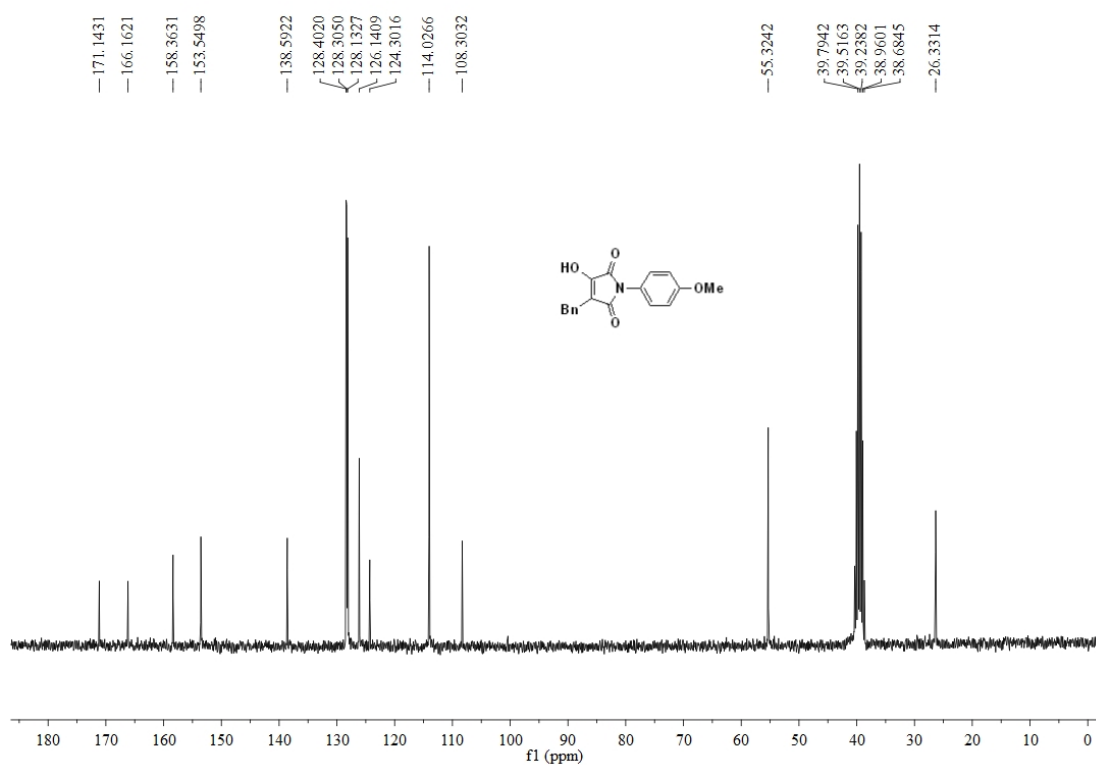

### 3-Hydroxy-1-(4-methoxyphenyl)-4-phenyl-1H-pyrrole-2,5-dione (1t):

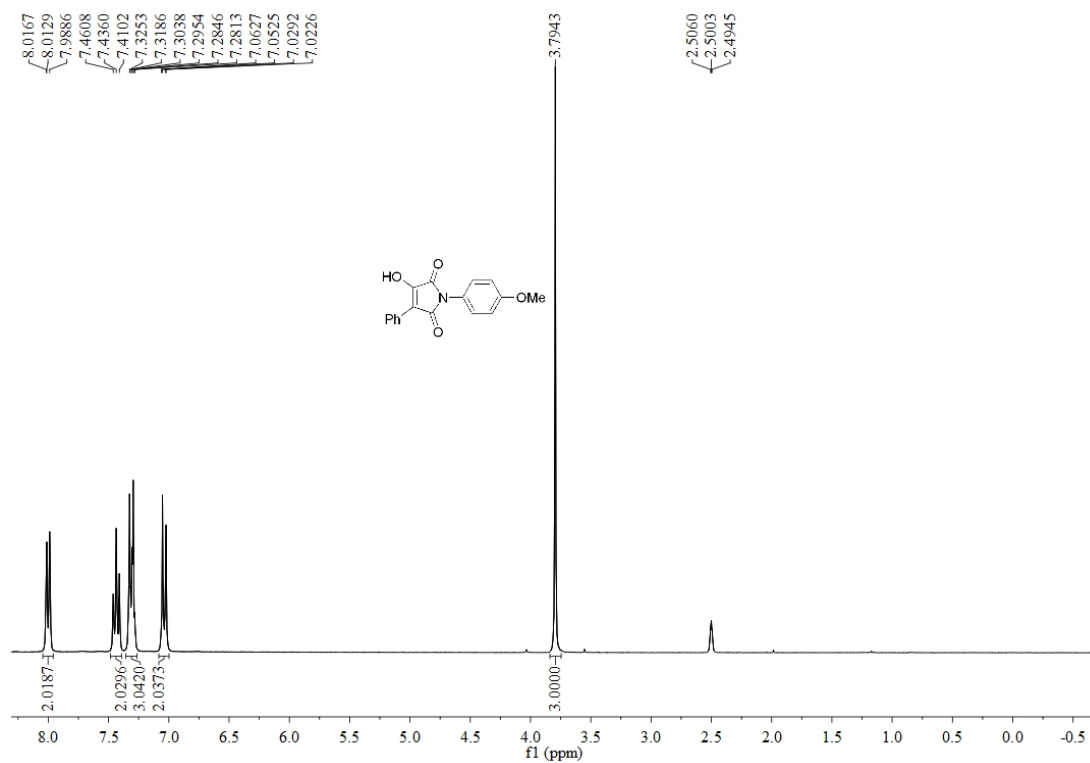

### 4-Methyl-N-(4-oxocyclohexa-2,5-dien-1-ylidene)benzenesulfonamide (2a):

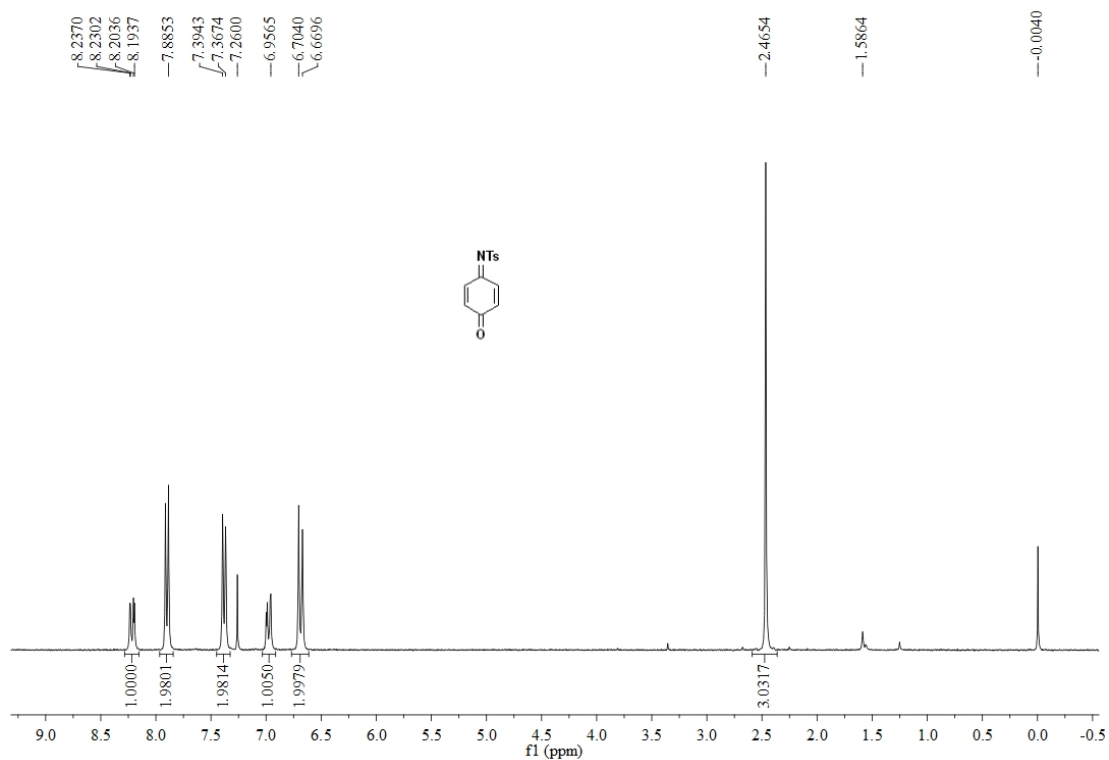

### 4-Methoxy-N-(4-oxocyclohexa-2,5-dien-1-ylidene)benzenesulfonamide (2b)

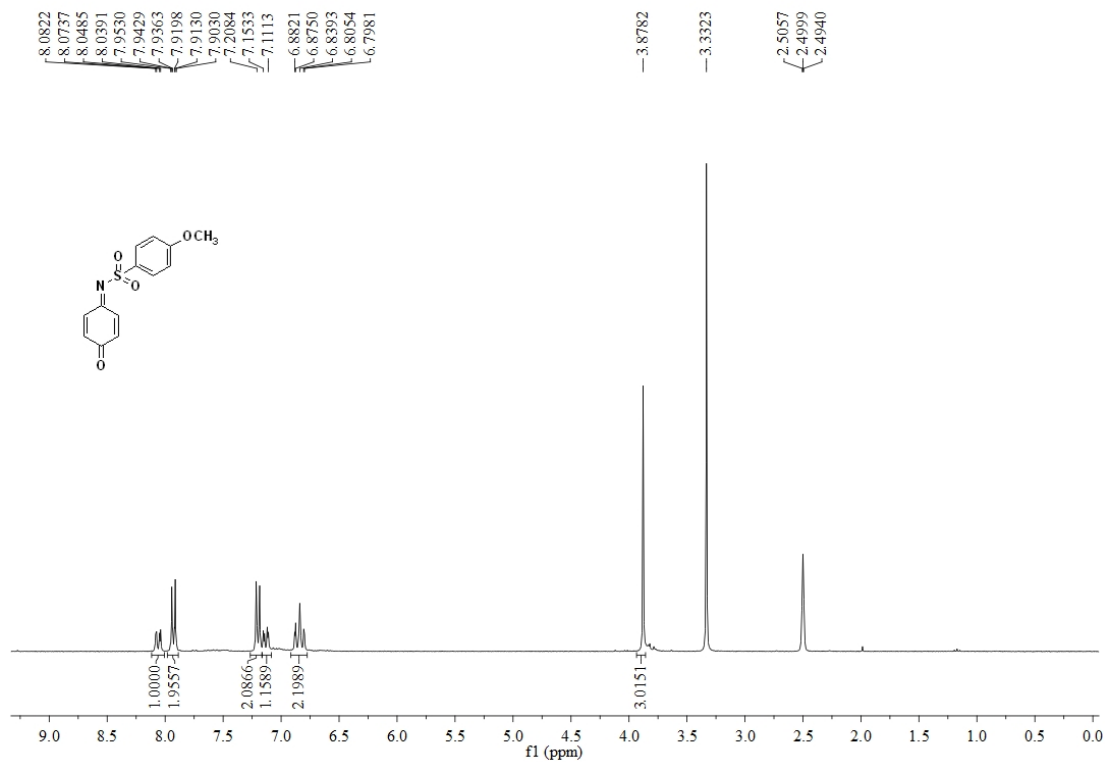

### 4-Nitro-*N*-(4-oxocyclohexa-2,5-dien-1-ylidene)benzenesulfonamide (2c):

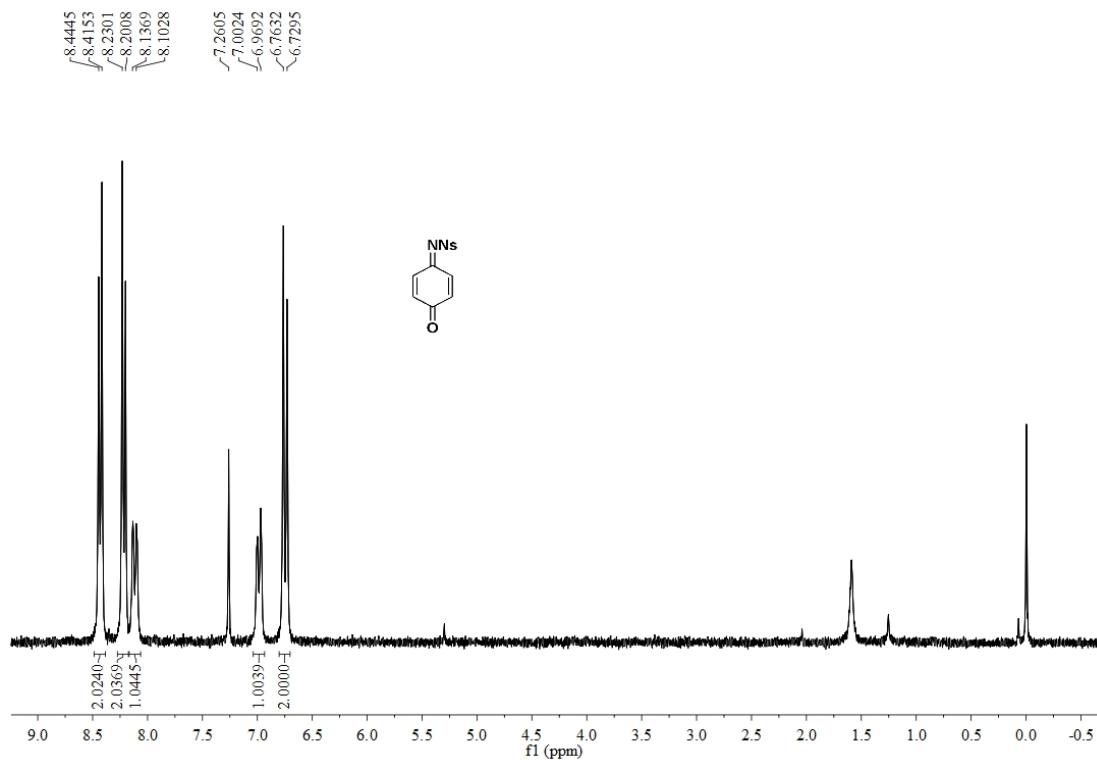

### *N*-(4-oxocyclohexa-2,5-dien-1-ylidene)benzenesulfonamide (2d):

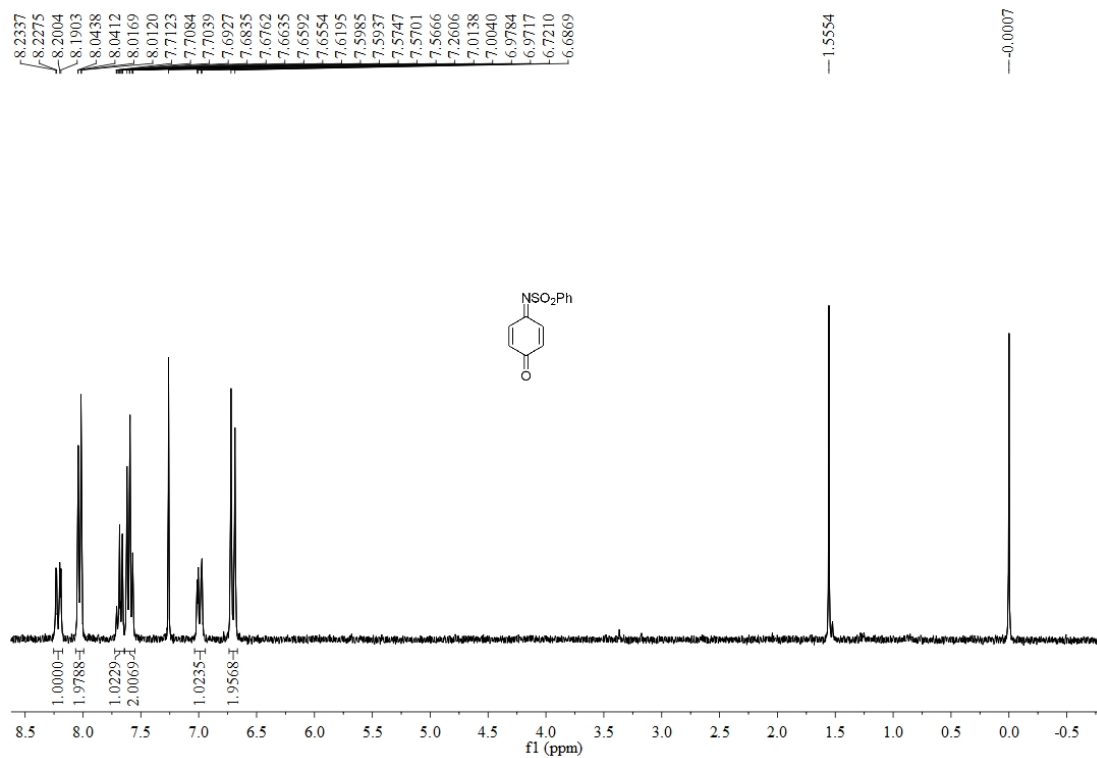

### ***N*-(4-oxocyclohexa-2,5-dien-1-ylidene)methanesulfonamide (2e):**

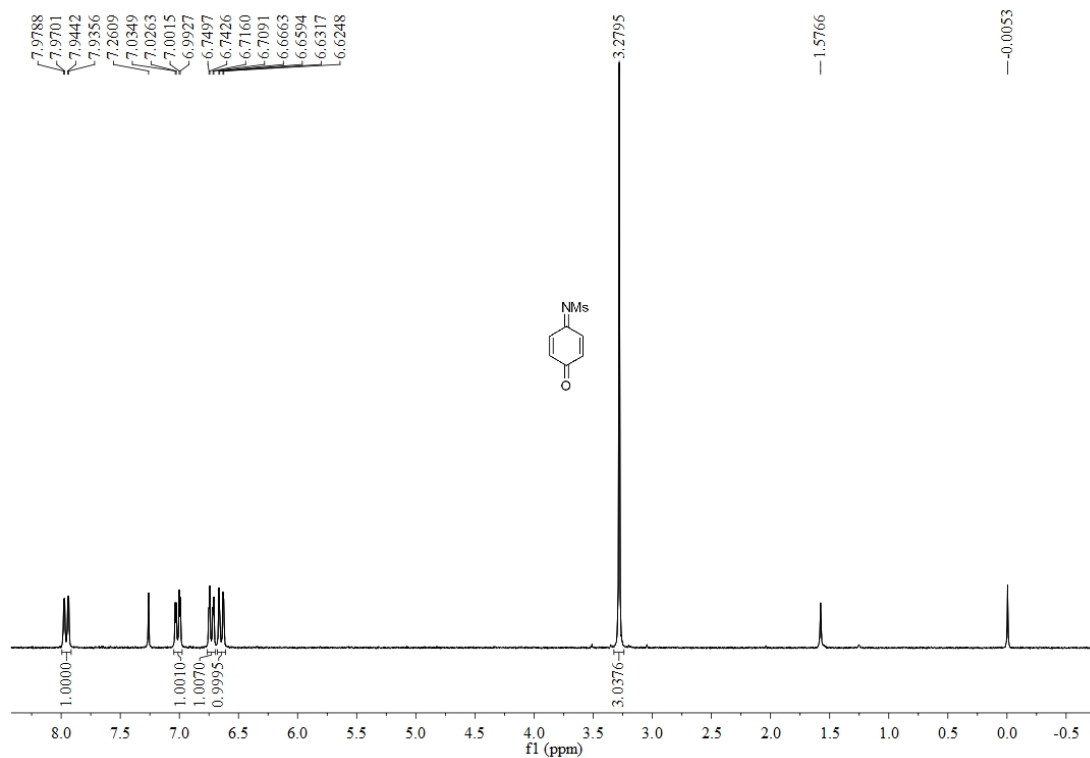

### ***N*-(2-chloro-4-oxocyclohexa-2,5-dien-1-ylidene)-4-methylbenzenesulfonamide (2f):**

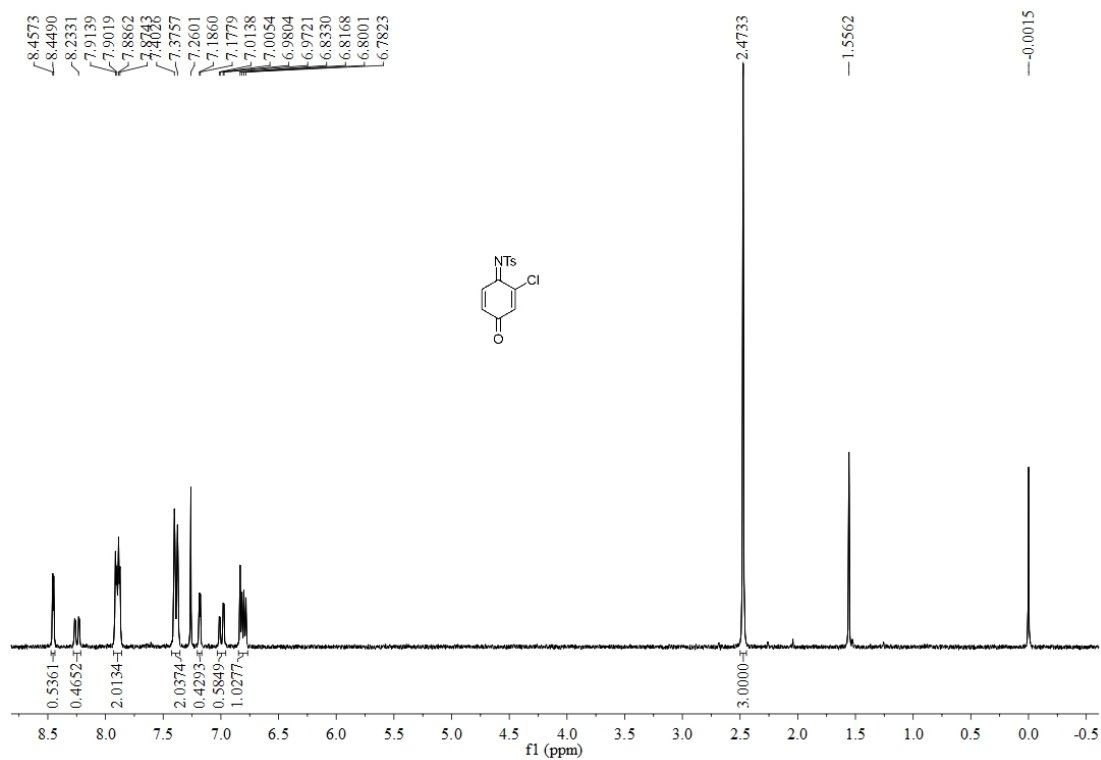

***N*-(3-chloro-4-oxocyclohexa-2,5-dien-1-ylidene)-4-methylbenzenesulfonamide (2g):**

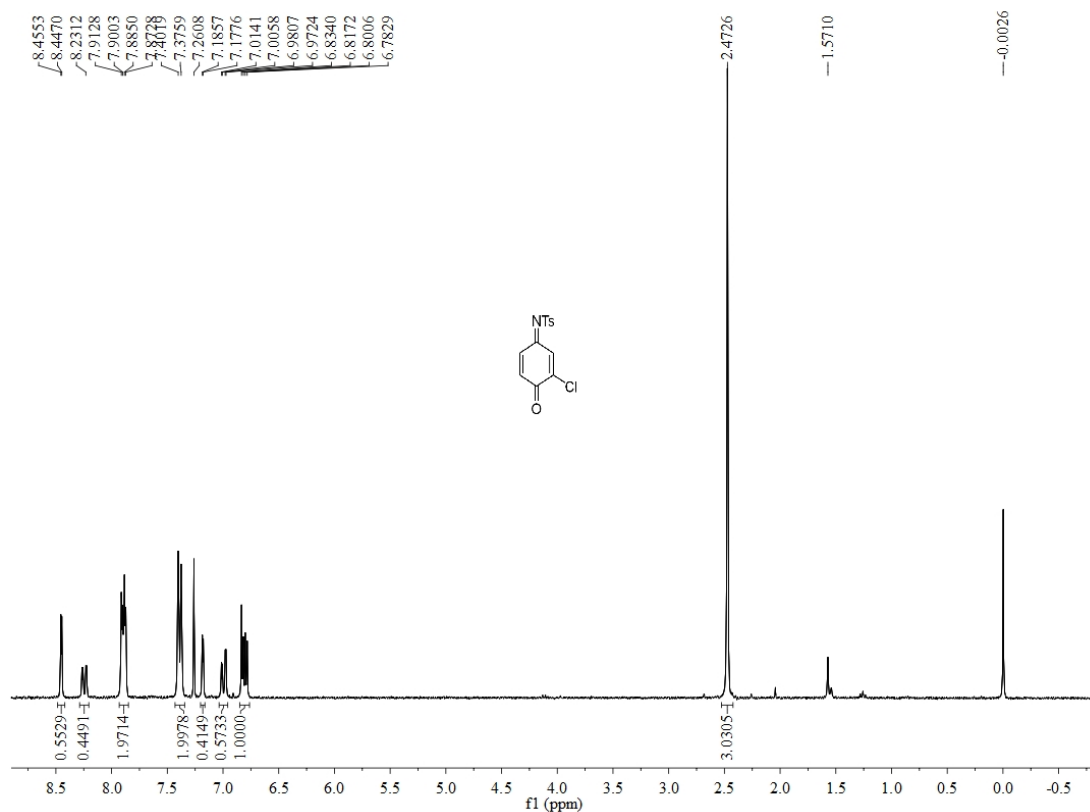

***N*-(3-bromo-4-oxocyclohexa-2,5-dien-1-ylidene)-4-methylbenzenesulfonamide (2h):**

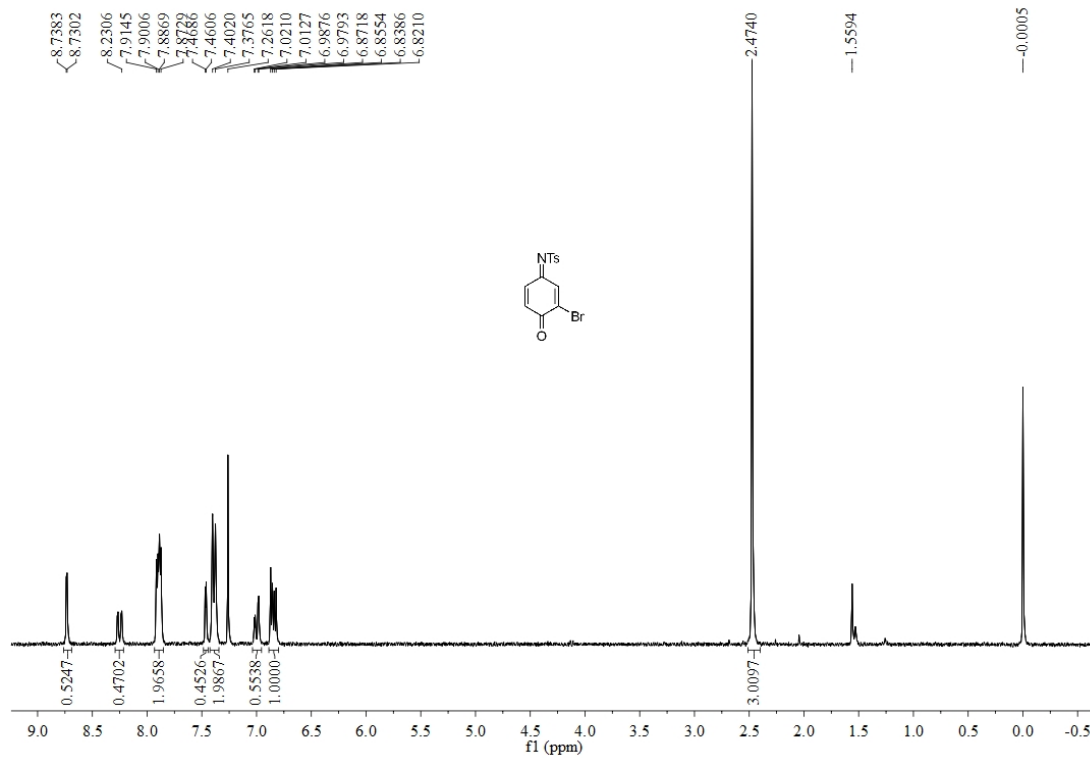



# 4-Methyl-N-(3-methyl-4-oxocyclohexa-2,5-dien-1-ylidene)benzenesulfonamide (2i):

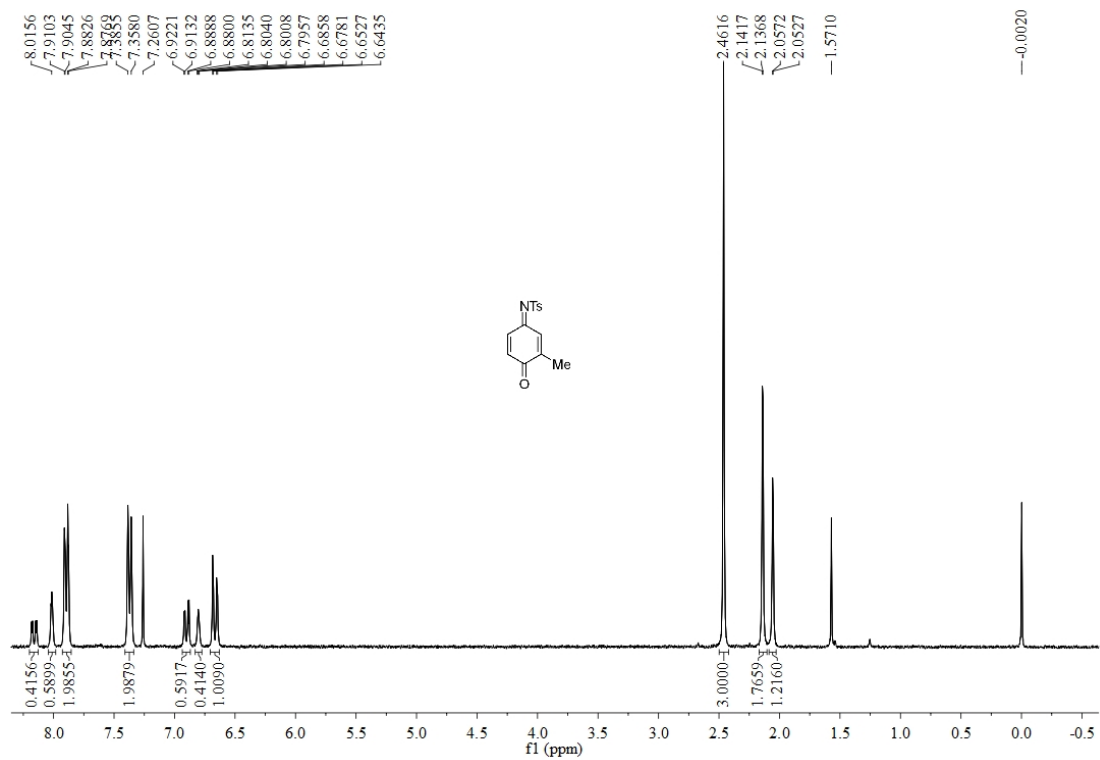

***N*-(3-methoxy-4-oxocyclohexa-2,5-dien-1-ylidene)-4-methylbenzenesulfonamide (2j):**

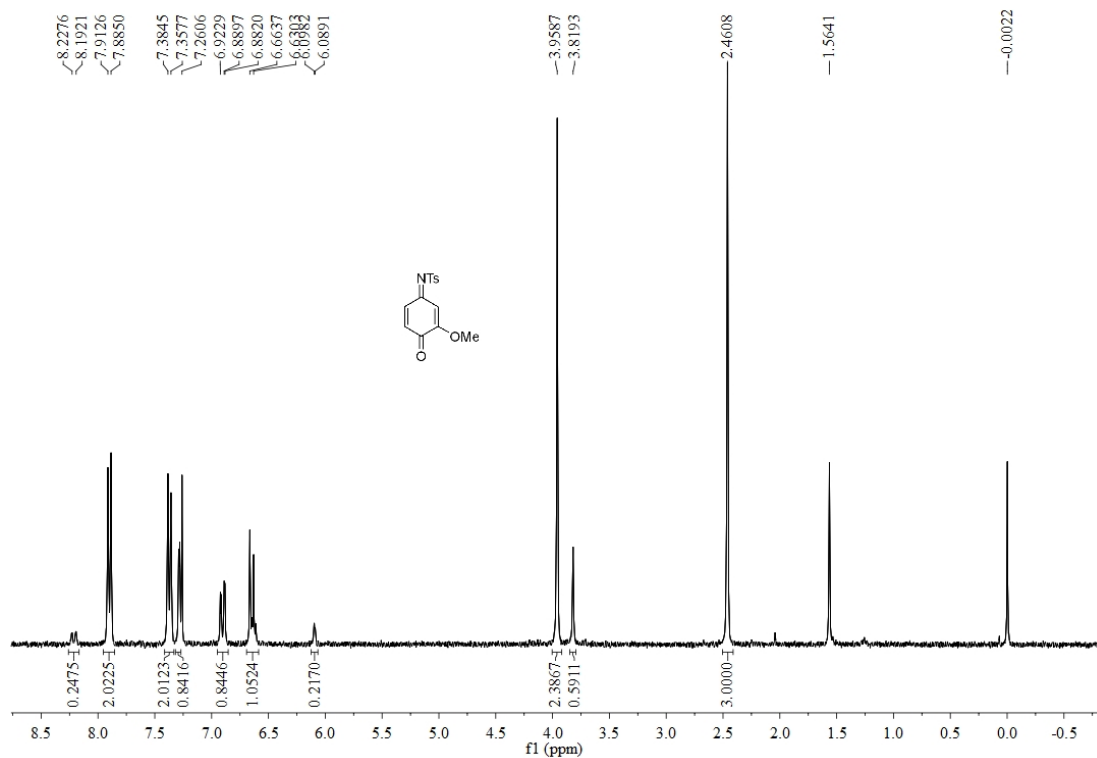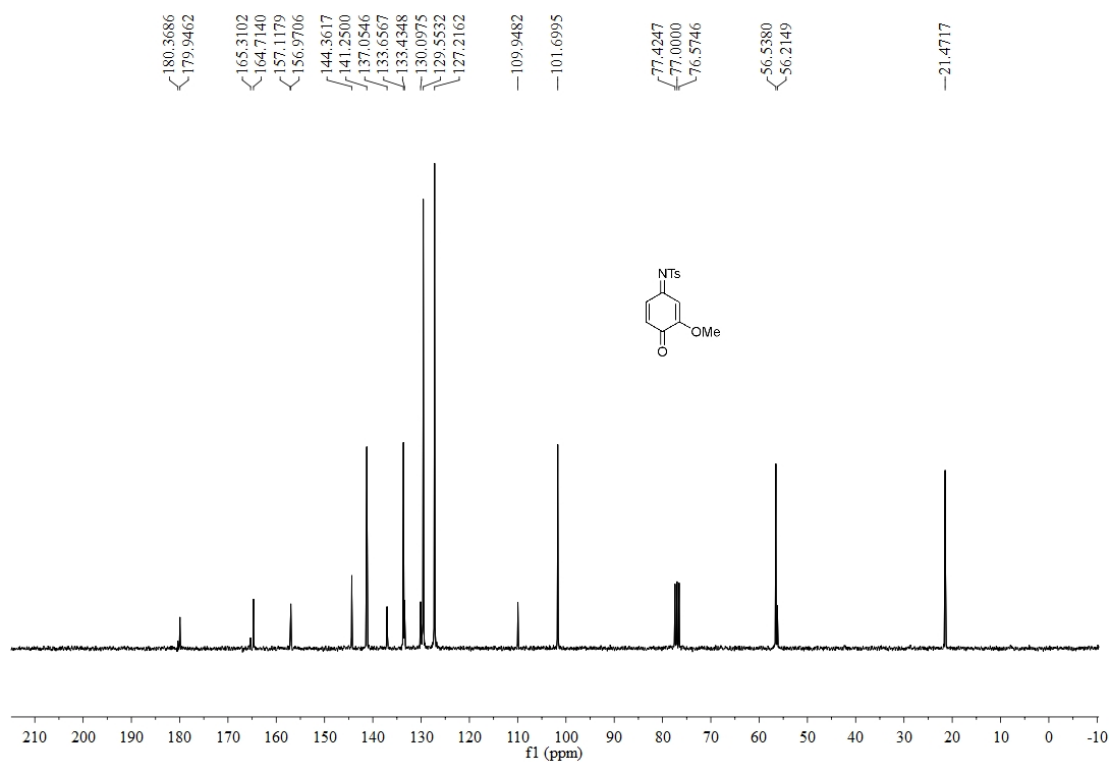

***N*-((3*aR*,8*bS*)-8*b*-ethyl-3*a*-hydroxy-2-(4-methoxyphenyl)-1,3-dioxo-2,3,3*a*,8*b*-tetrahydro-1*H*-benzofuro[2,3-*c*]pyrrol-7-yl)-4-methylbenzenesulfonamide (3*aa*):**

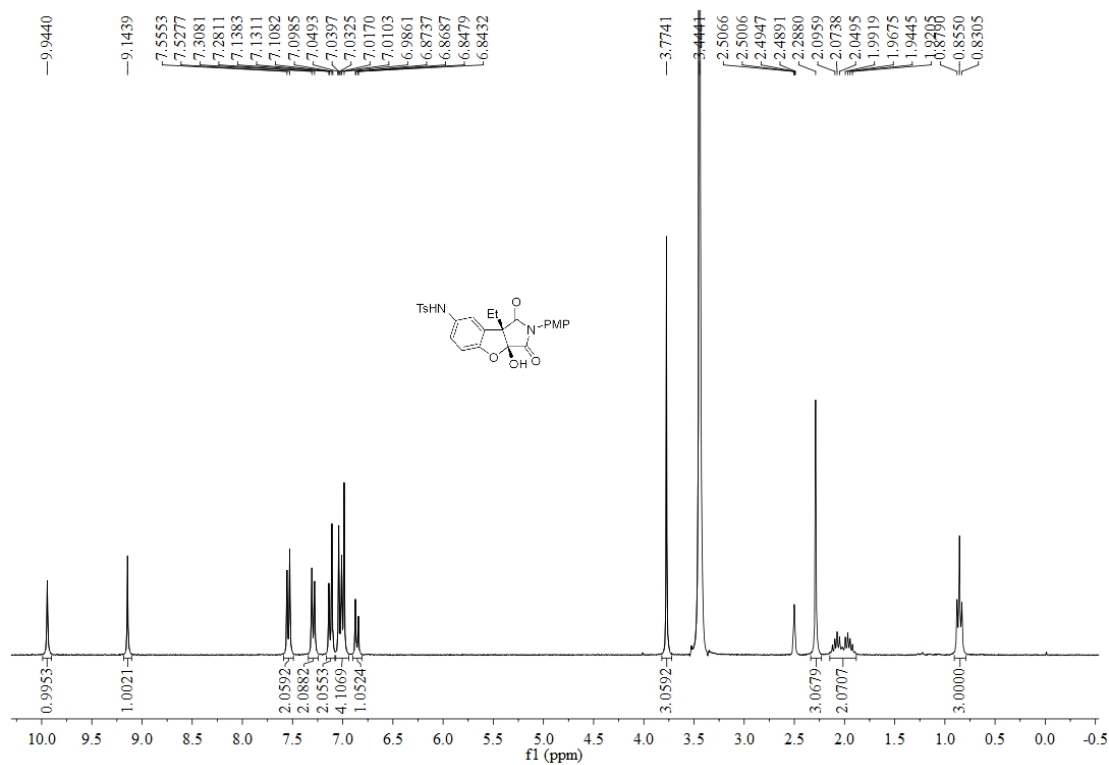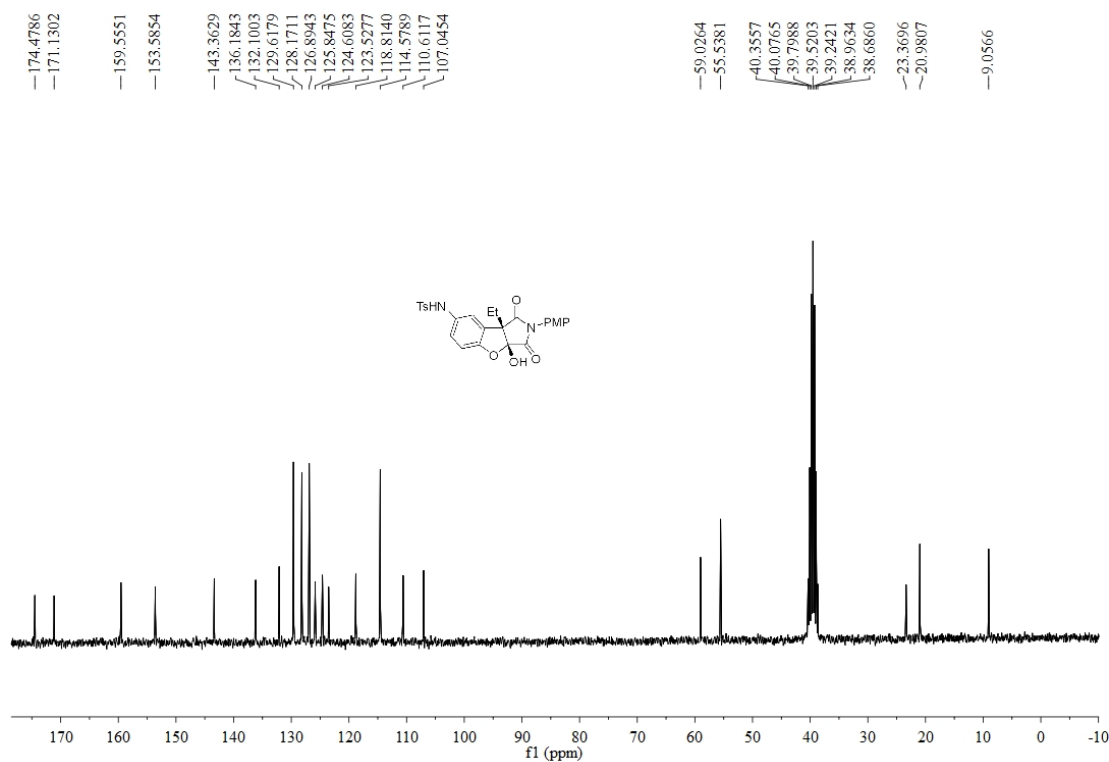

***N*-((3*aR*,8*bS*)-8*b*-ethyl-3*a*-hydroxy-1,3-dioxo-2-phenyl-2,3,3*a*,8*b*-tetrahydro-1*H*-benzofuro[2,3-*c*]pyrrol-7-yl)-4-methylbenzenesulfonamide (3*ba*):**

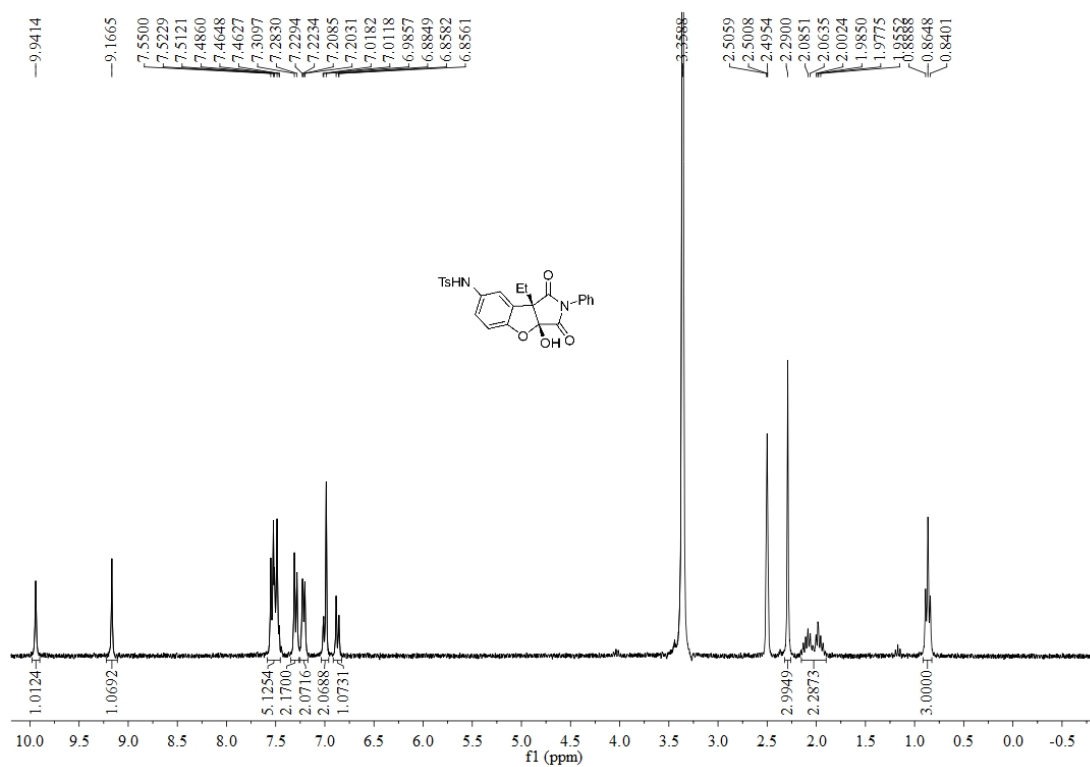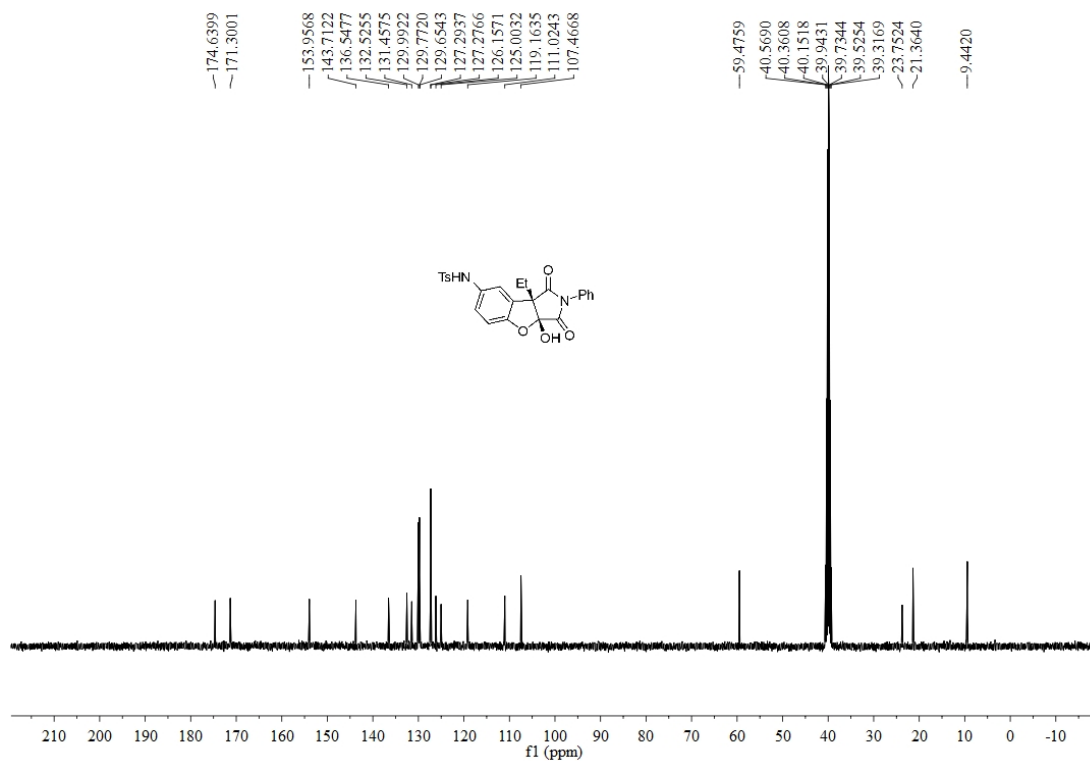

***N*-((3*aR*,8*bS*)-8*b*-ethyl-3*a*-hydroxy-1,3-dioxo-2-(*p*-tolyl)-2,3,3*a*,8*b*-tetrahydro-1*H*-benzofuro[2,3-*c*]pyrrol-7-yl)-4-methylbenzenesulfonamide (3*ca*):**

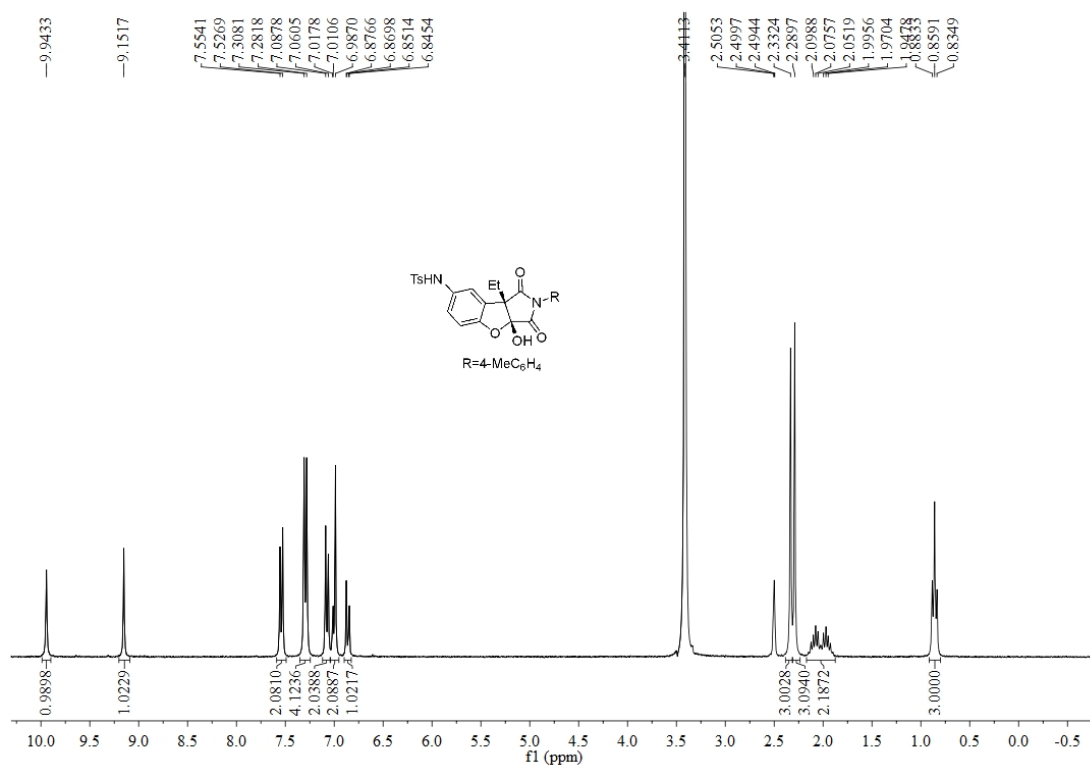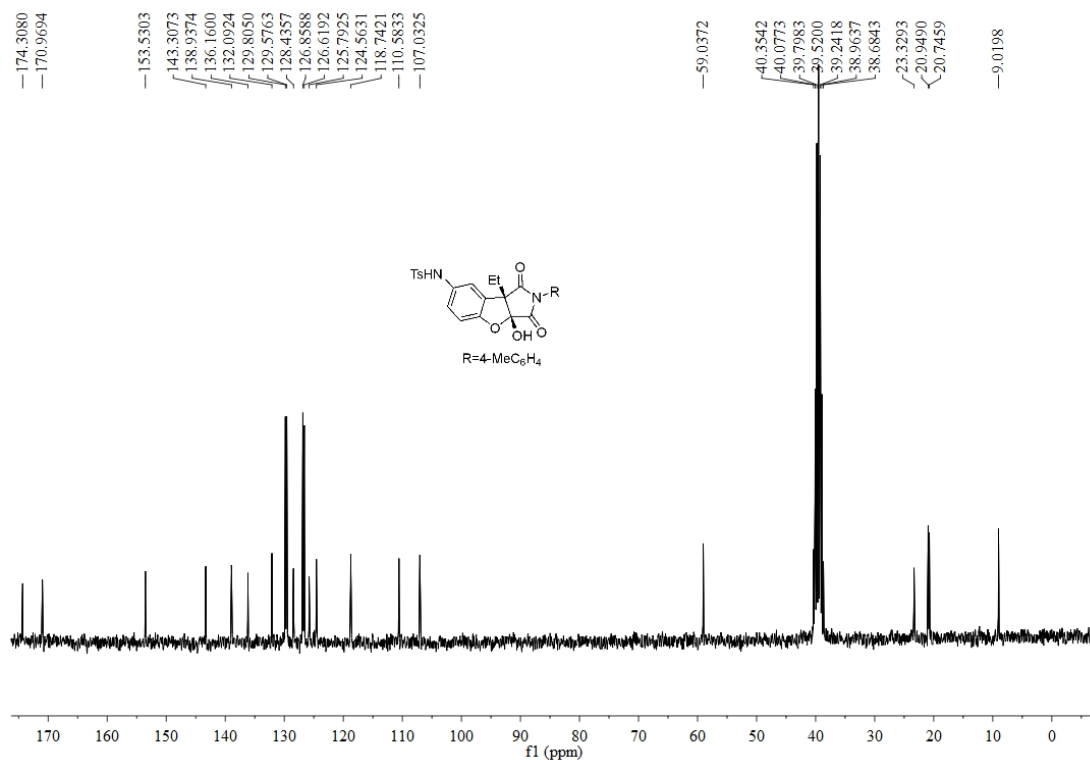

***N*-((3*aR*,8*bS*)-8*b*-ethyl-2-(4-ethylphenyl)-3*a*-hydroxy-1,3-dioxo-2,3,3*a*,8*b*-tetrahydro-1*H*-benzofuro[2,3-*c*]pyrrol-7-yl)-4-methylbenzenesulfonamide (3*da*):**

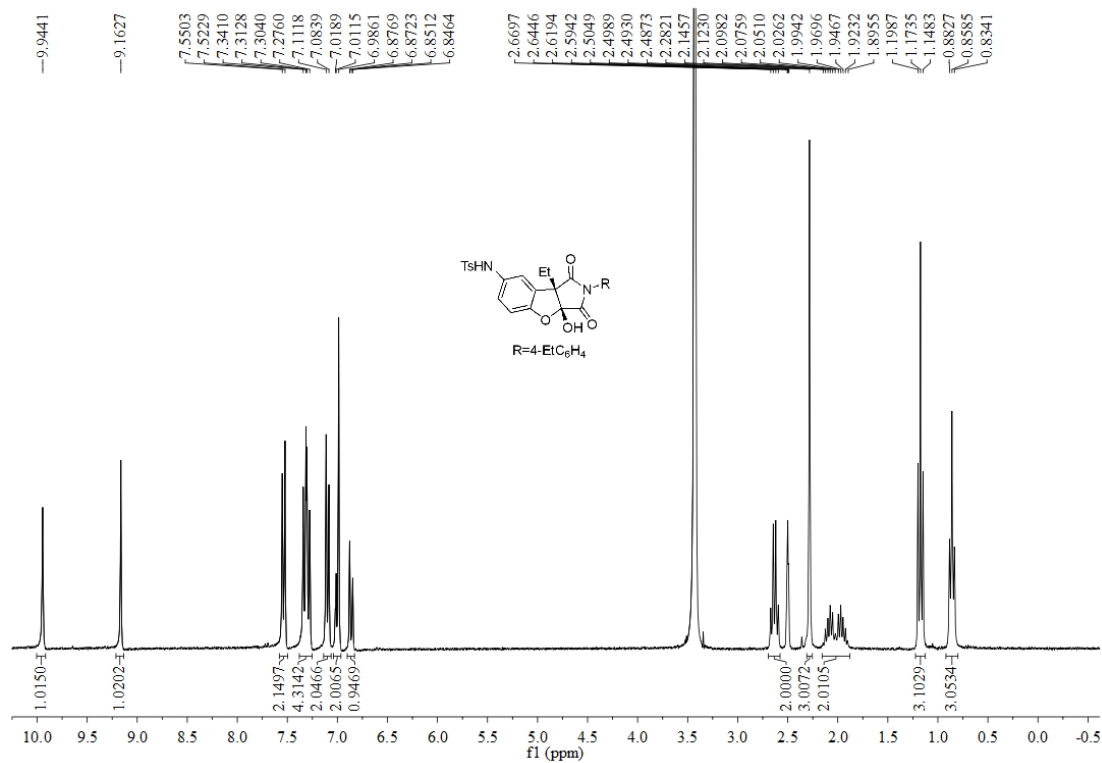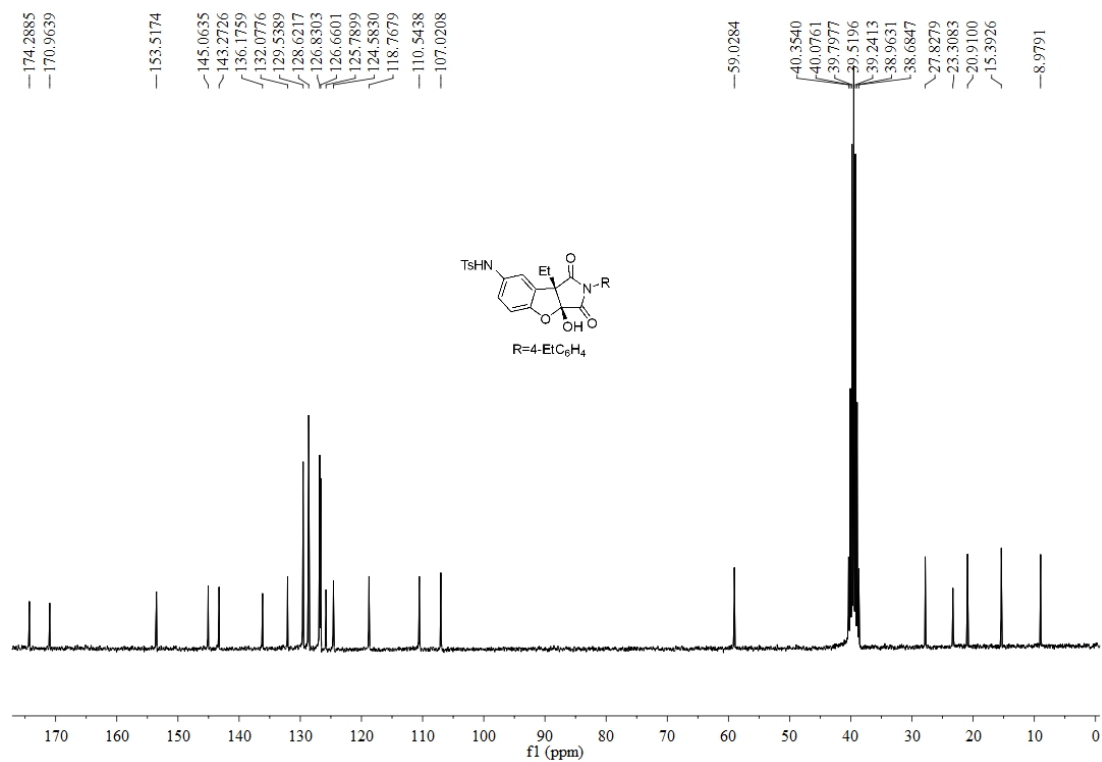

***N*-((3*aR*,8*bS*)-8*b*-ethyl-3*a*-hydroxy-2-(4-isopropylphenyl)-1,3-dioxo-2,3,3*a*,8*b*-tetrahydro-1*H*-benzofuro[2,3-*c*]pyrrol-7-yl)-4-methylbenzenesulfonamide (3*ea*):**

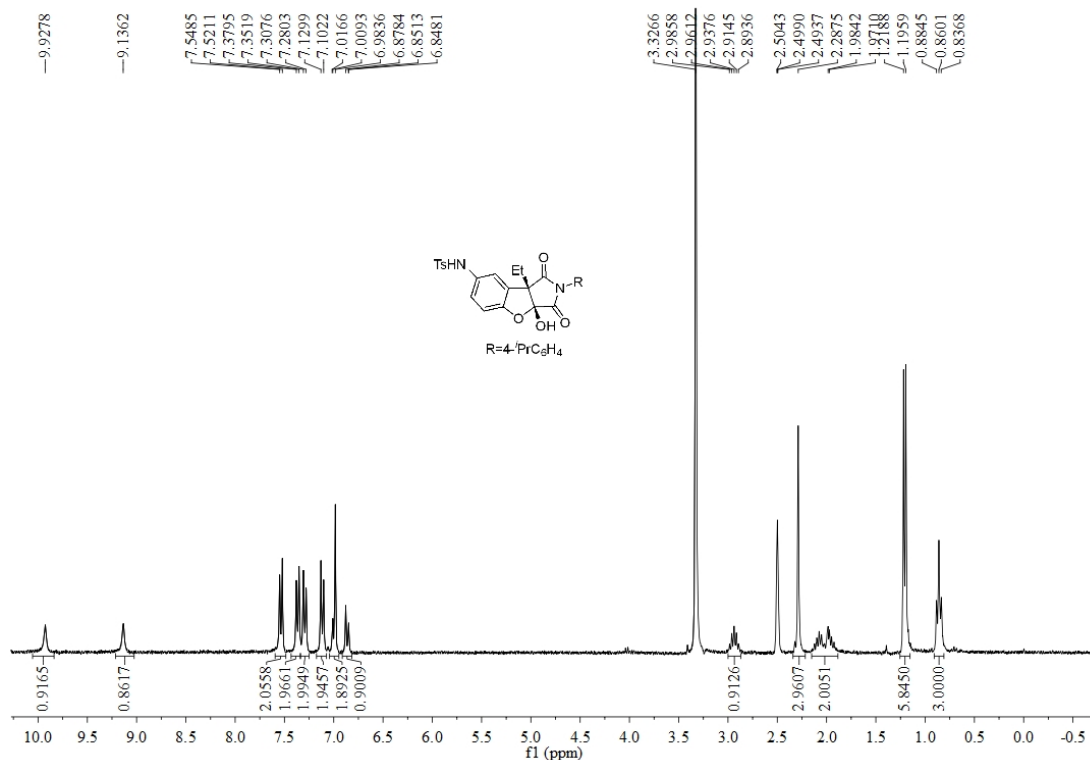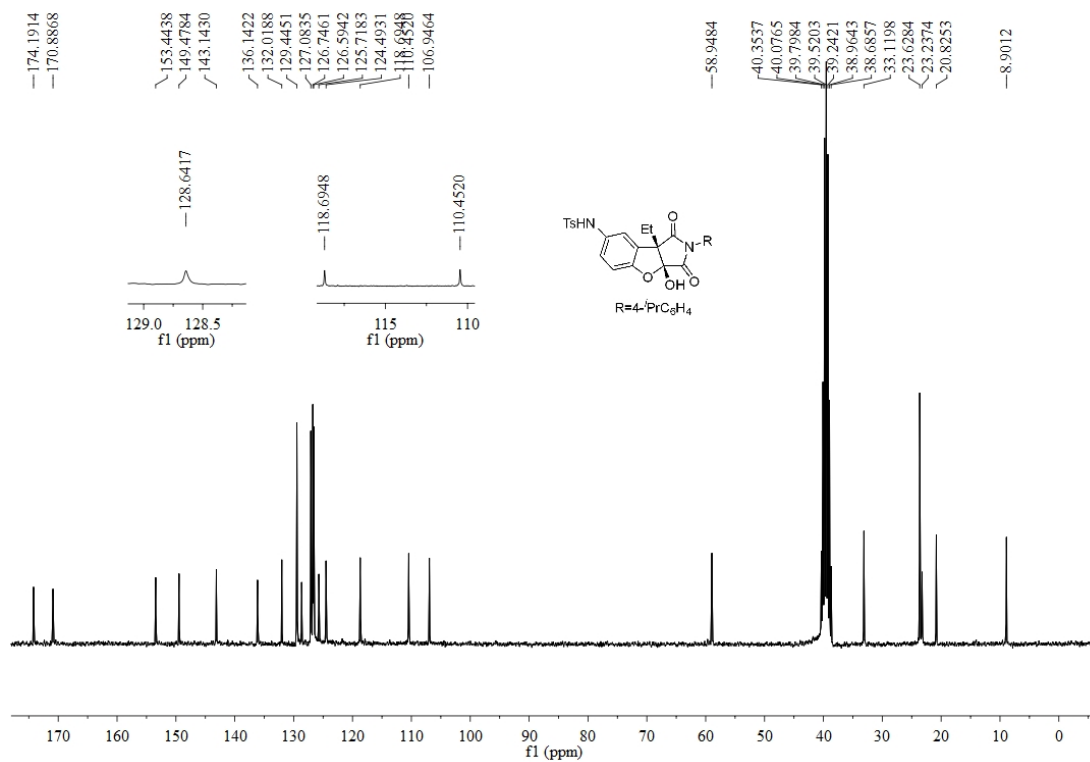

***N*-((3*aR*,8*bS*)-8*b*-ethyl-3*a*-hydroxy-1,3-dioxo-2-(4-phenoxyphenyl)-2,3,3*a*,8*b*-tetrahydro-1*H*-benzofuro[2,3-*c*]pyrrol-7-yl)-4-methylbenzenesulfonamide (3*fa*):**

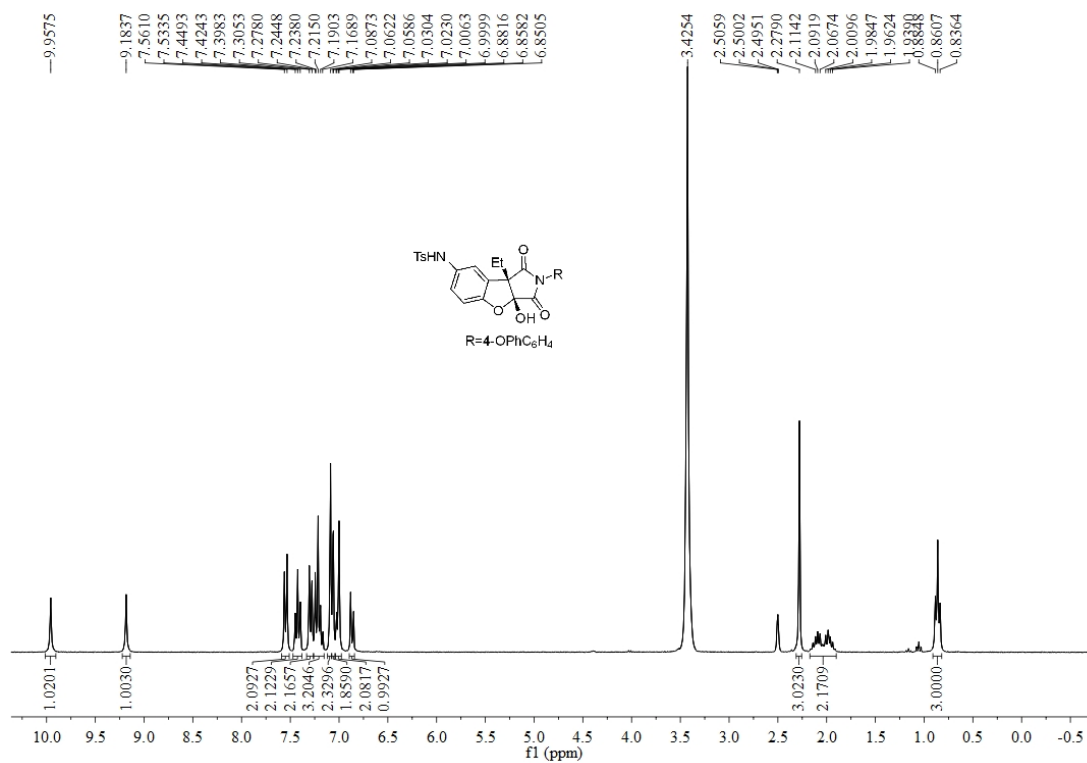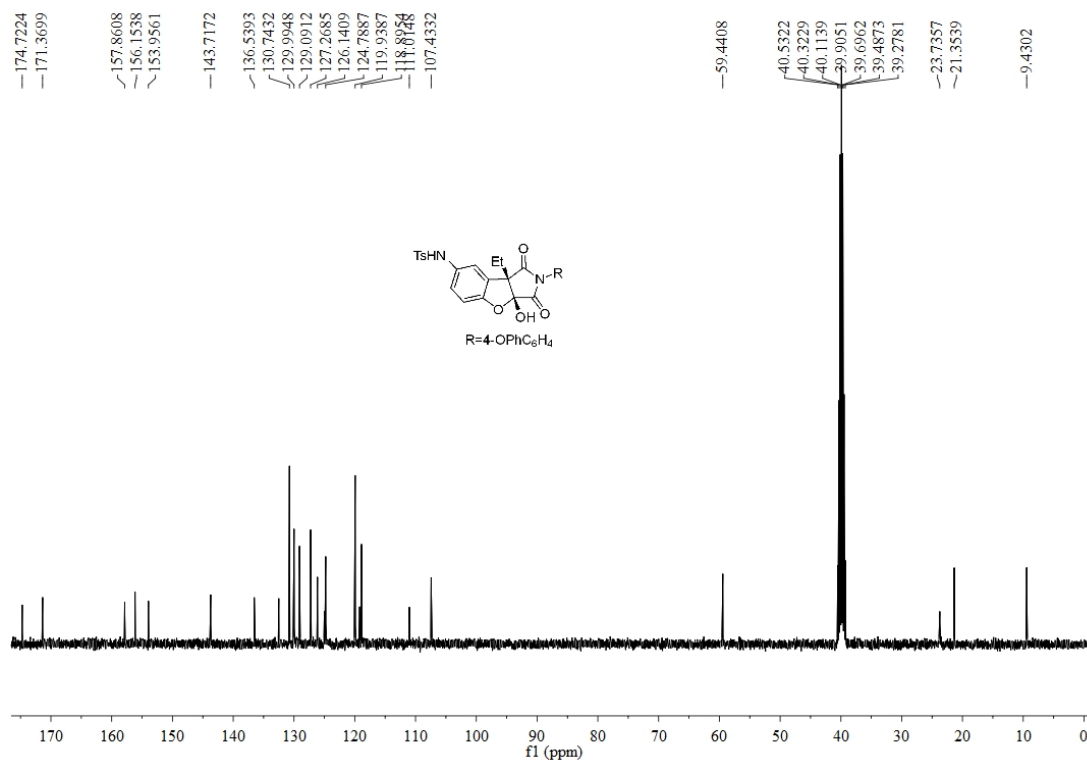



***N*-((3*aR*,8*bS*)-8*b*-ethyl-2-(4-fluorophenyl)-3*a*-hydroxy-1,3-dioxo-2,3,3*a*,8*b*-tetrahydro-1*H*-benzofuro[2,3-*c*]pyrrol-7-yl)-4-methylbenzenesulfonamide (3*ga*):**

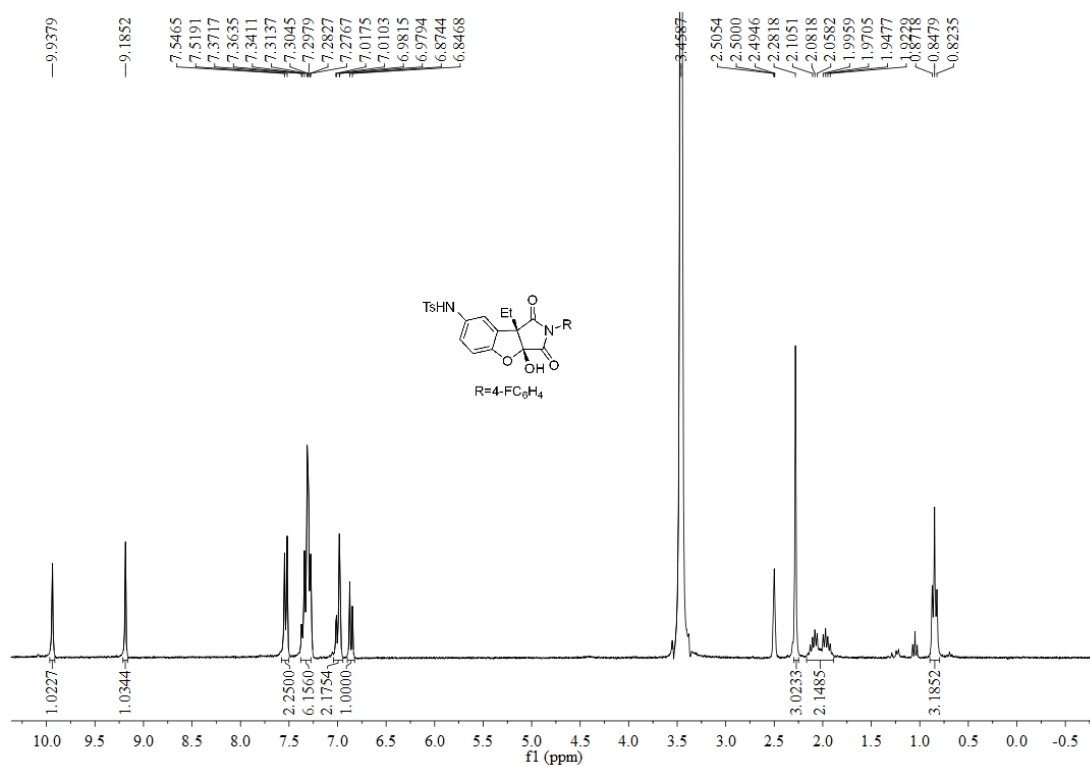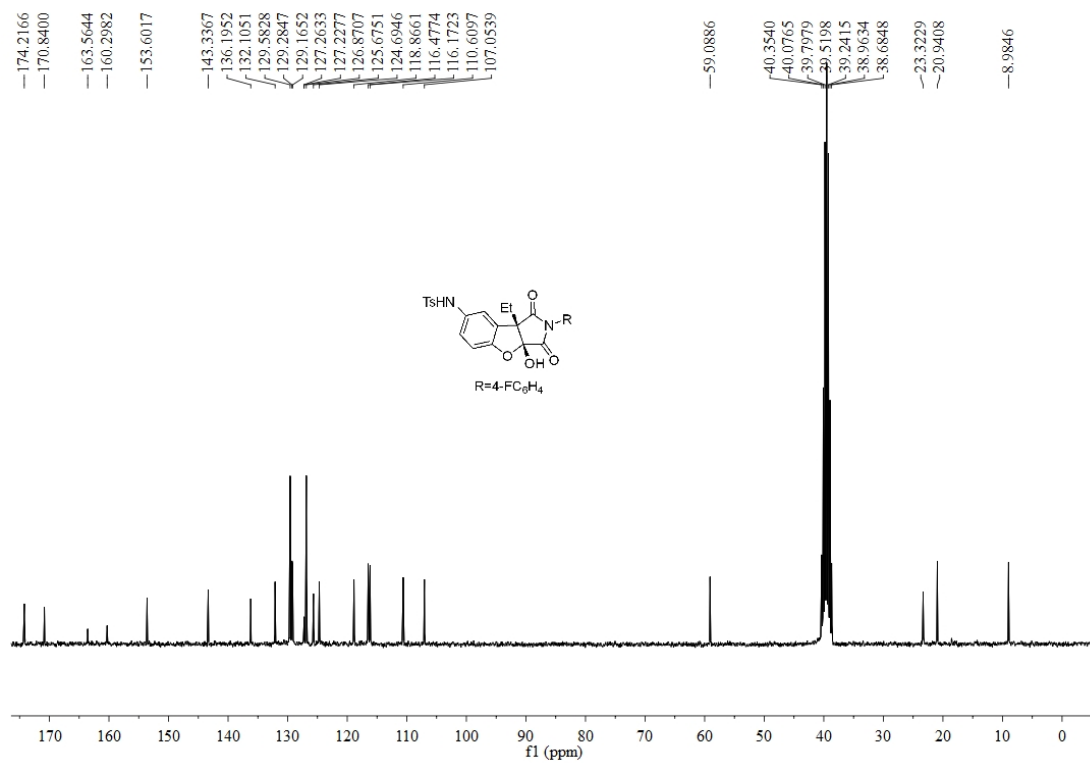

***N*-((3*aR*,8*bS*)-2-(4-chlorophenyl)-8*b*-ethyl-3*a*-hydroxy-1,3-dioxo-2,3,3*a*,8*b*-tetrahydro-1*H*-benzofuro[2,3-*c*]pyrrol-7-yl)-4-methylbenzenesulfonamide (3*ha*):**

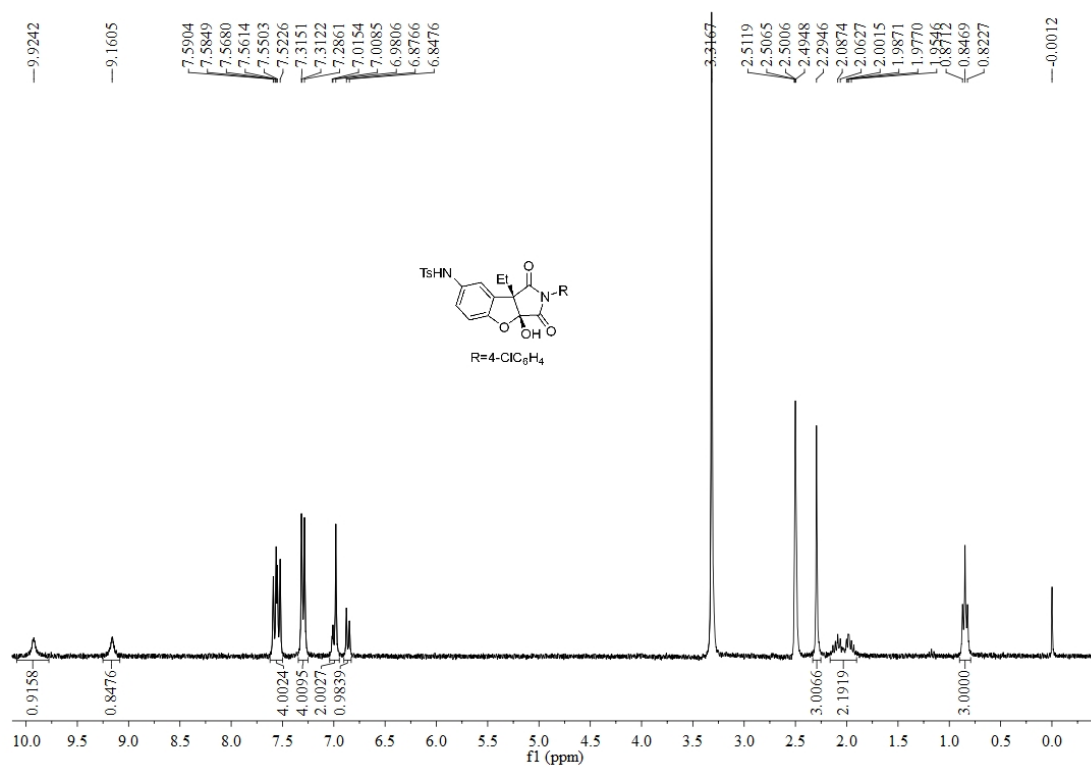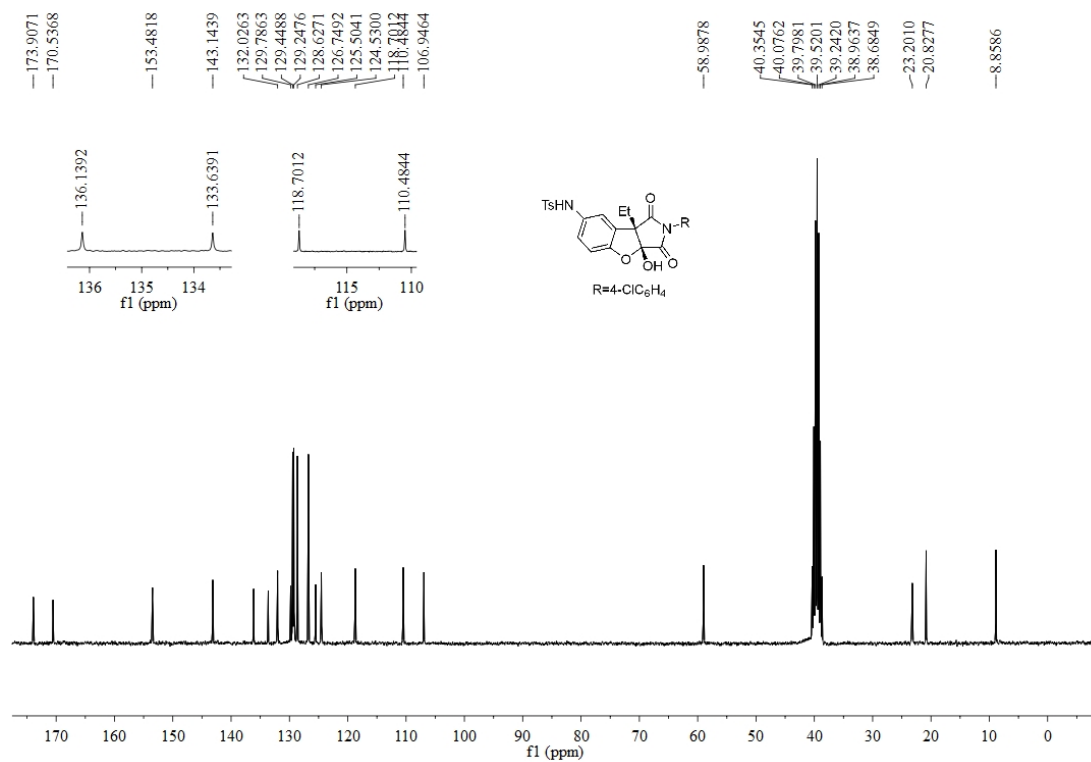

***N*-((3*aR*,8*bS*)-2-(4-bromophenyl)-8*b*-ethyl-3*a*-hydroxy-1,3-dioxo-2,3,3*a*,8*b*-tetrahydro-1*H*-benzofuro[2,3-*c*]pyrrol-7-yl)-4-methylbenzenesulfonamide (**3ia**):**

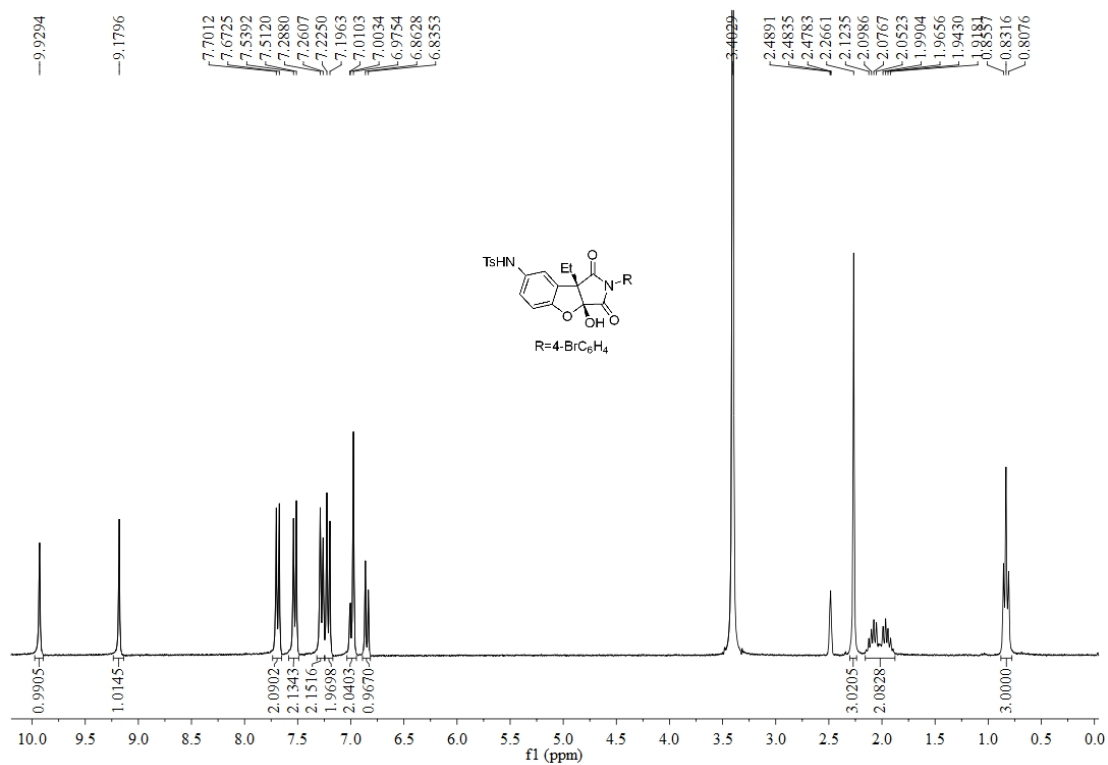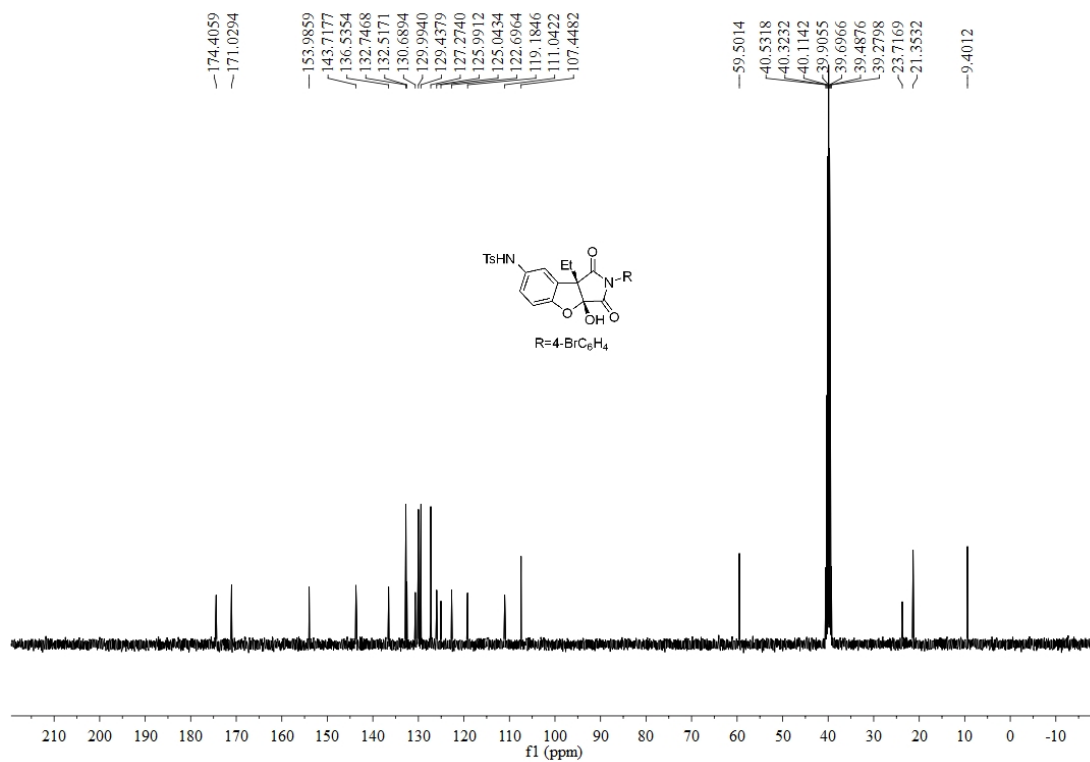

***N*-((3*aR*,8*bS*)-8*b*-ethyl-3*a*-hydroxy-2-(3-methoxyphenyl)-1,3-dioxo-2,3,3*a*,8*b*-tetrahydro-1*H*-benzofuro[2,3-*c*]pyrrol-7-yl)-4-methylbenzenesulfonamide (**3ja**):**

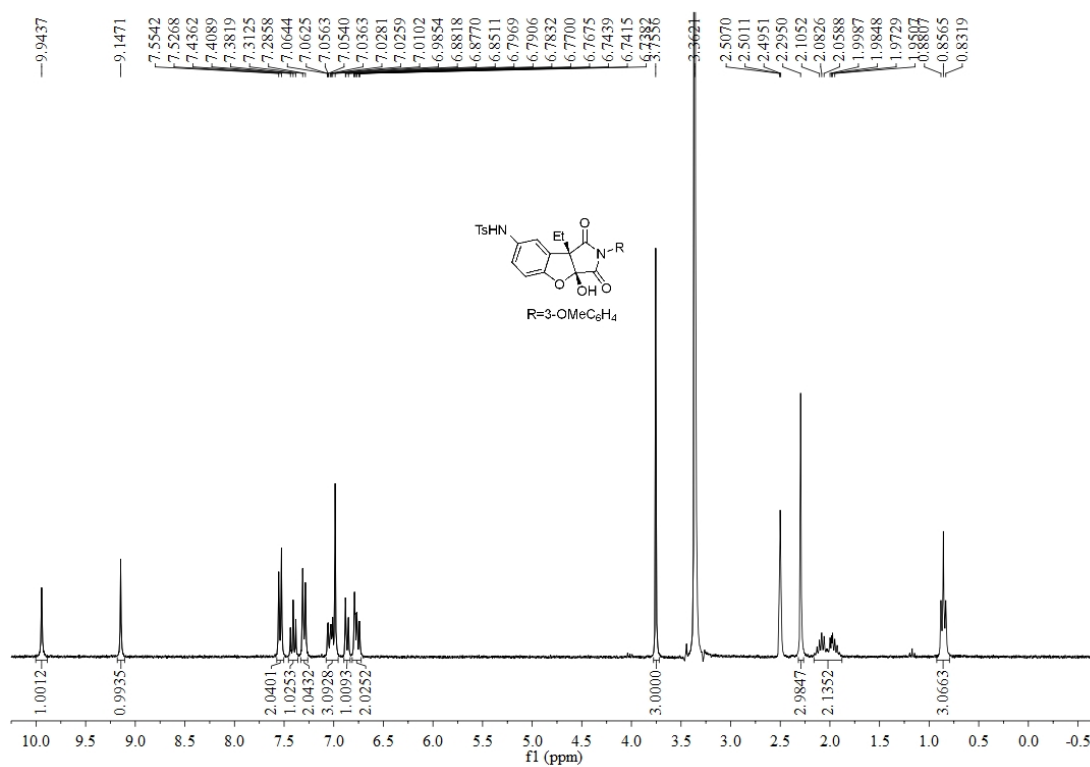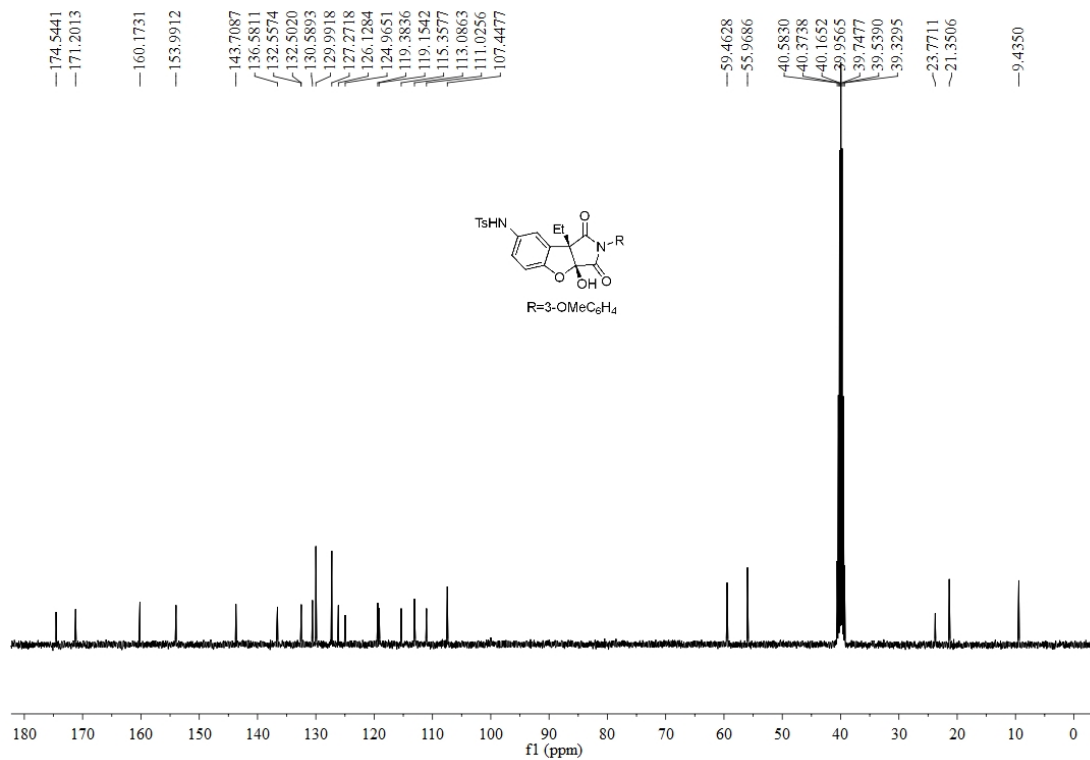

***N*-((3*aR*,8*bS*)-8*b*-ethyl-3*a*-hydroxy-1,3-dioxo-2-(*m*-tolyl)-2,3,3*a*,8*b*-tetrahydro-1*H*-benzofuro[2,3-*c*]pyrrol-7-yl)-4-methylbenzenesulfonamide (3*ka*):**

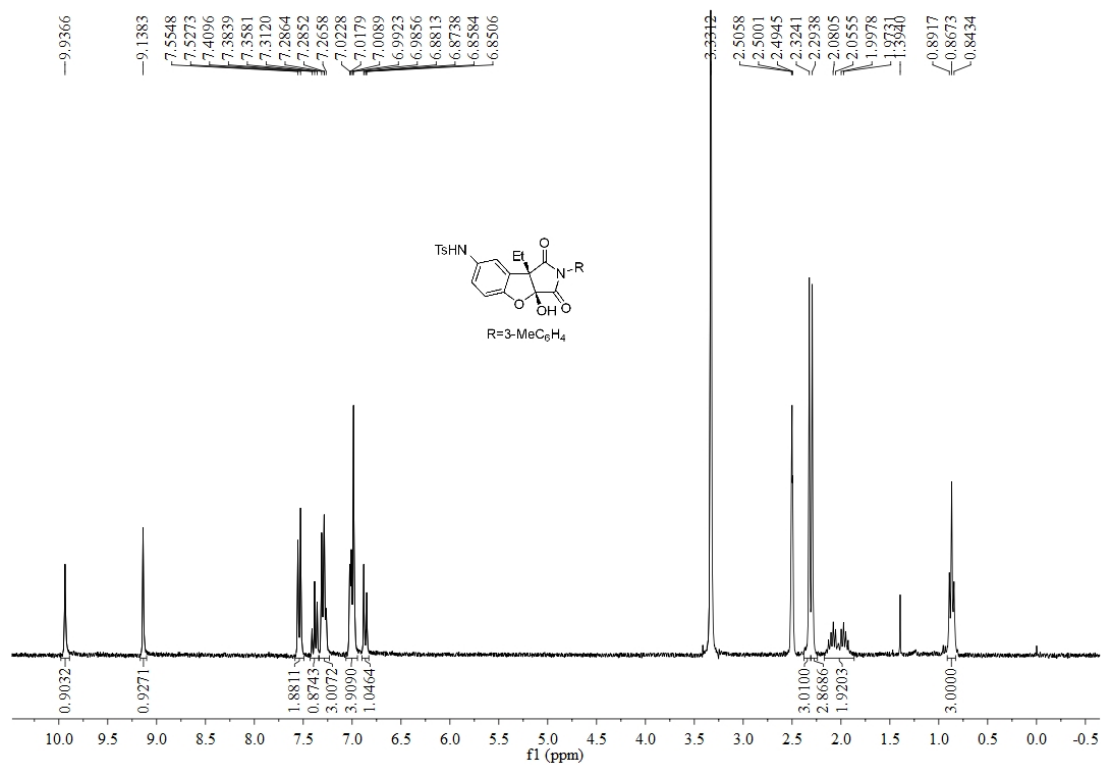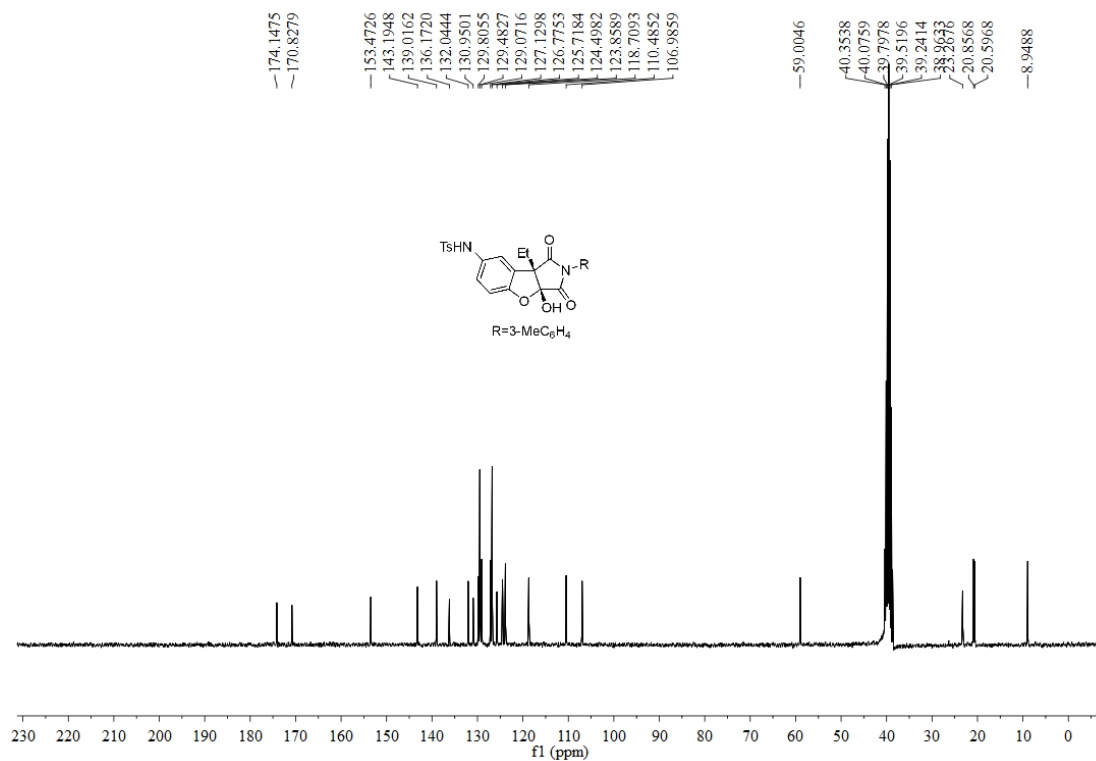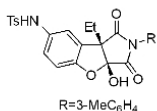

***N*-((3*aR*,8*bS*)-2-(3,5-dimethoxyphenyl)-8*b*-ethyl-3*a*-hydroxy-1,3-dioxo-2,3,3*a*,8*b*-tetrahydro-1*H*-benzofuro[2,3-*c*]pyrrol-7-yl)-4-methylbenzenesulfonamide (**3la**):**

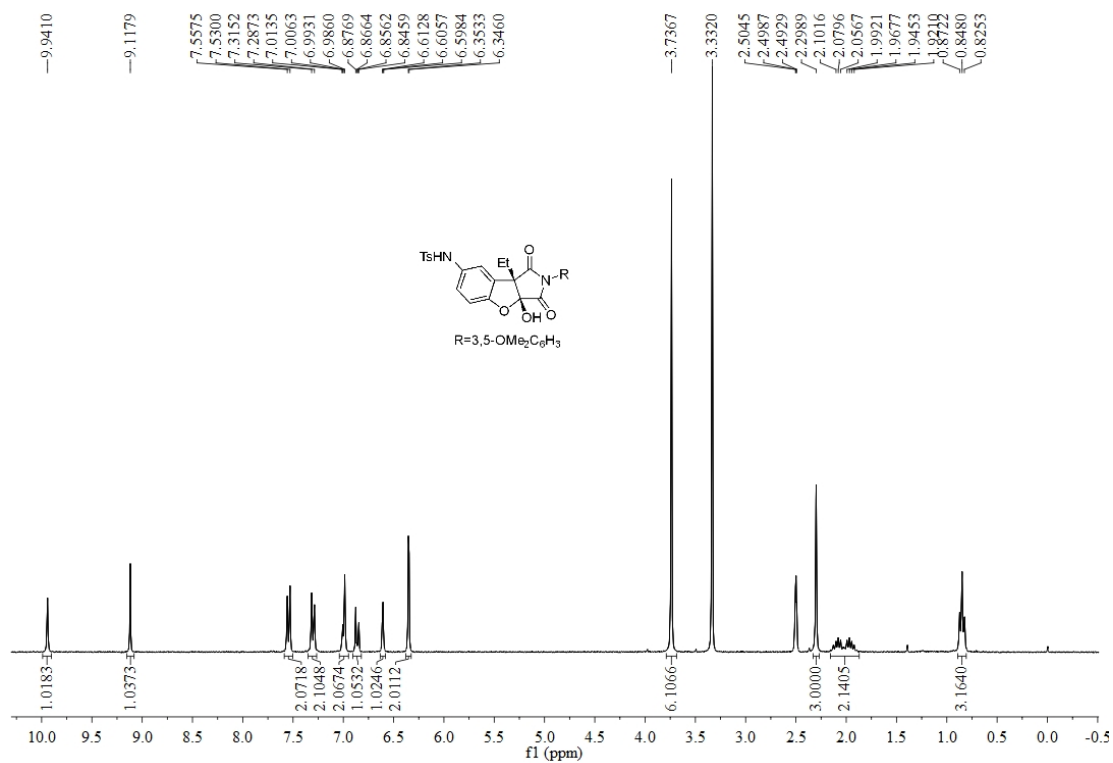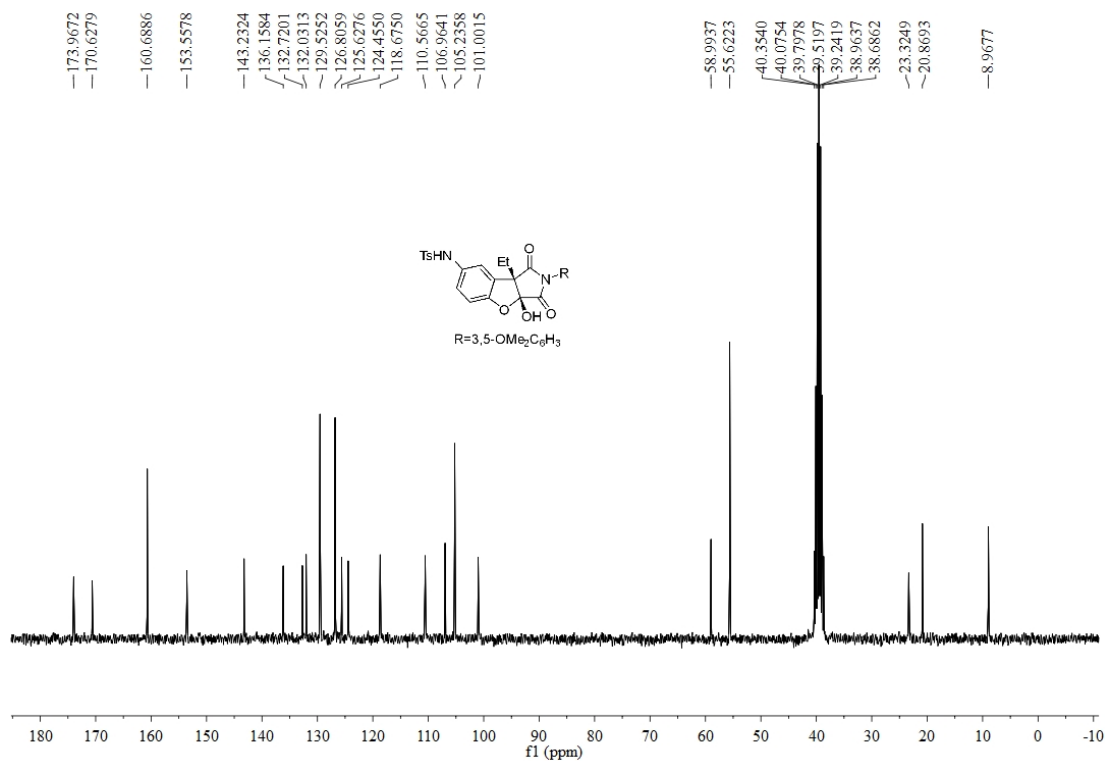

***N*-((3*aR*,8*bS*)-8*b*-ethyl-3*a*-hydroxy-2-(naphthalen-2-yl)-1,3-dioxo-2,3,3*a*,8*b*-tetrahydro-1*H*-benzofuro[2,3-*c*]pyrrol-7-yl)-4-methylbenzenesulfonamide (3*ma*):**

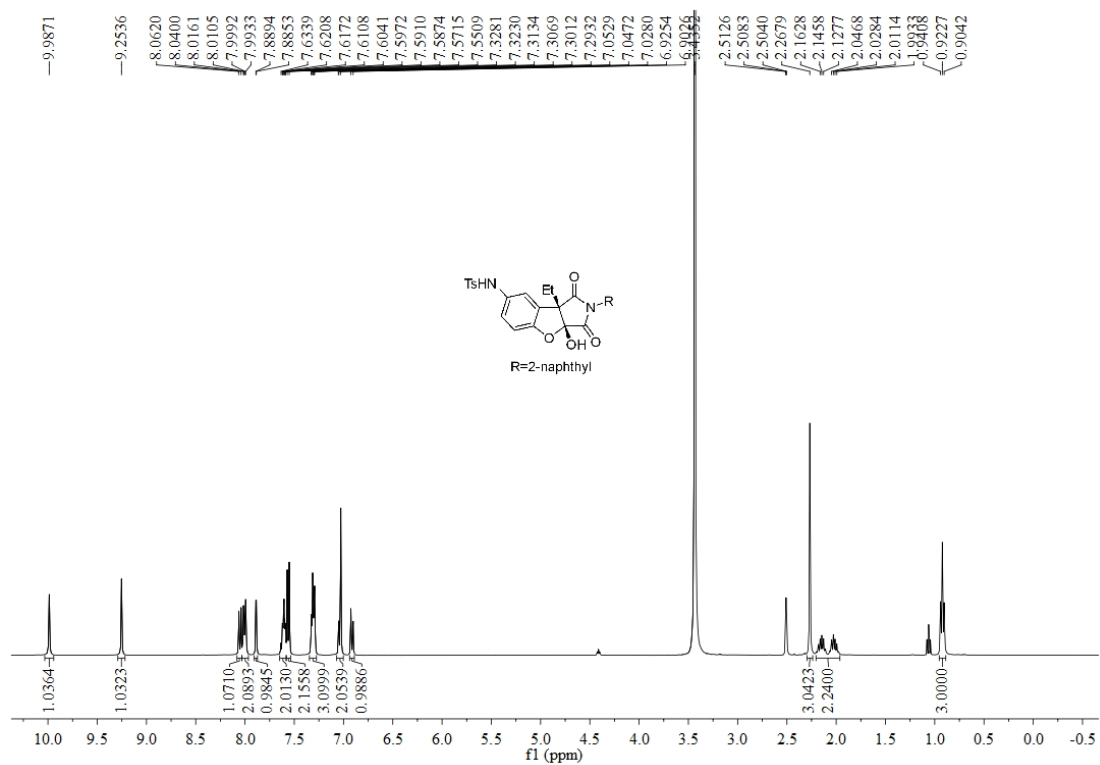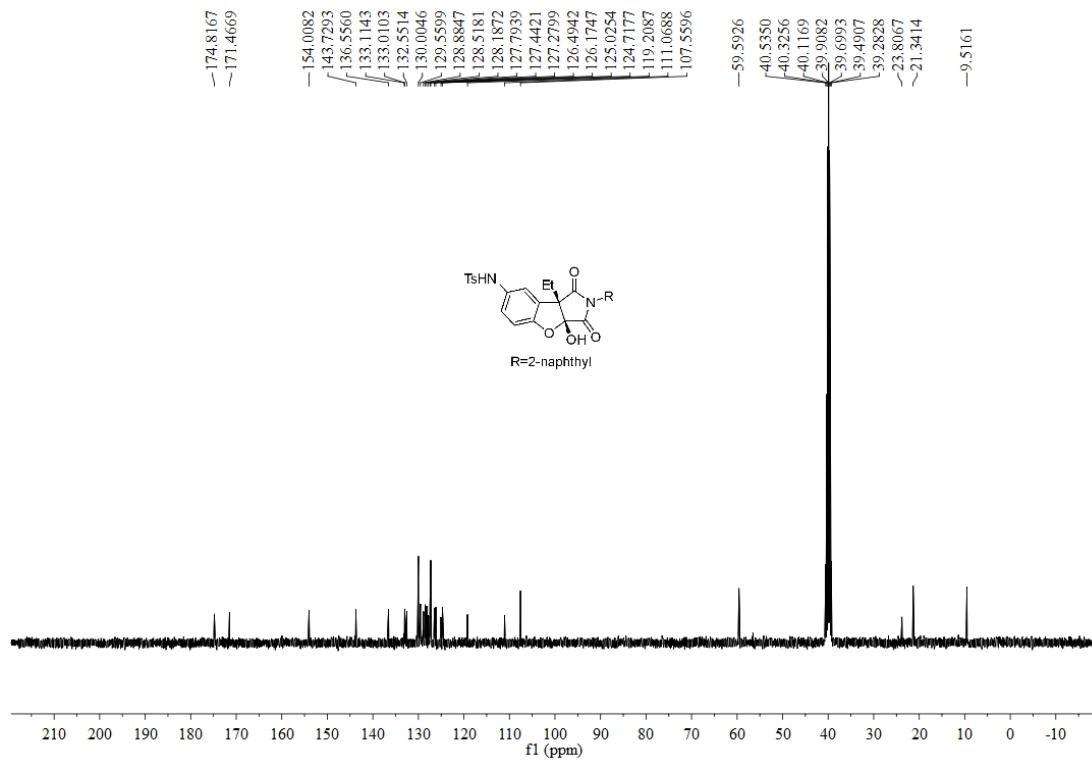

***N*-((3*aR*,8*bS*)-2-(benzo[*d*][1,3]dioxol-5-yl)-8*b*-ethyl-3*a*-hydroxy-1,3-dioxo-2,3,3*a*,8*b*-tetrahydro-1*H*-benzofuro[2,3-*c*]pyrrol-7-yl)-4-methylbenzenesulfonamide (3*na*):**

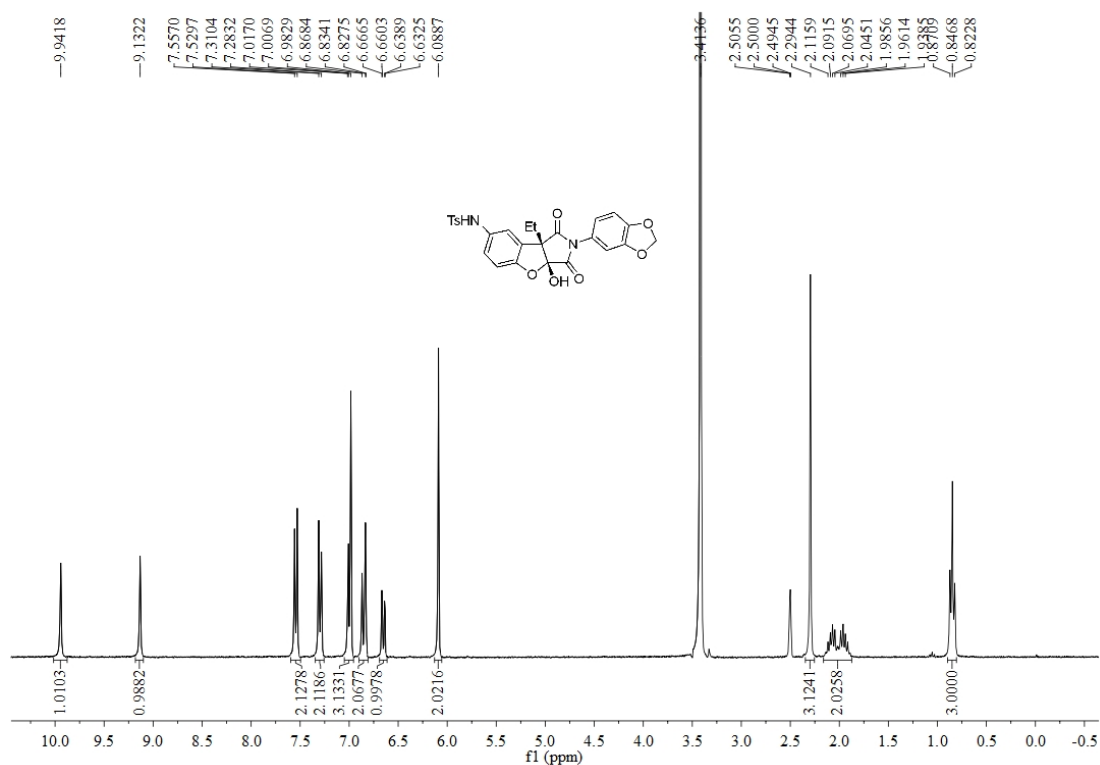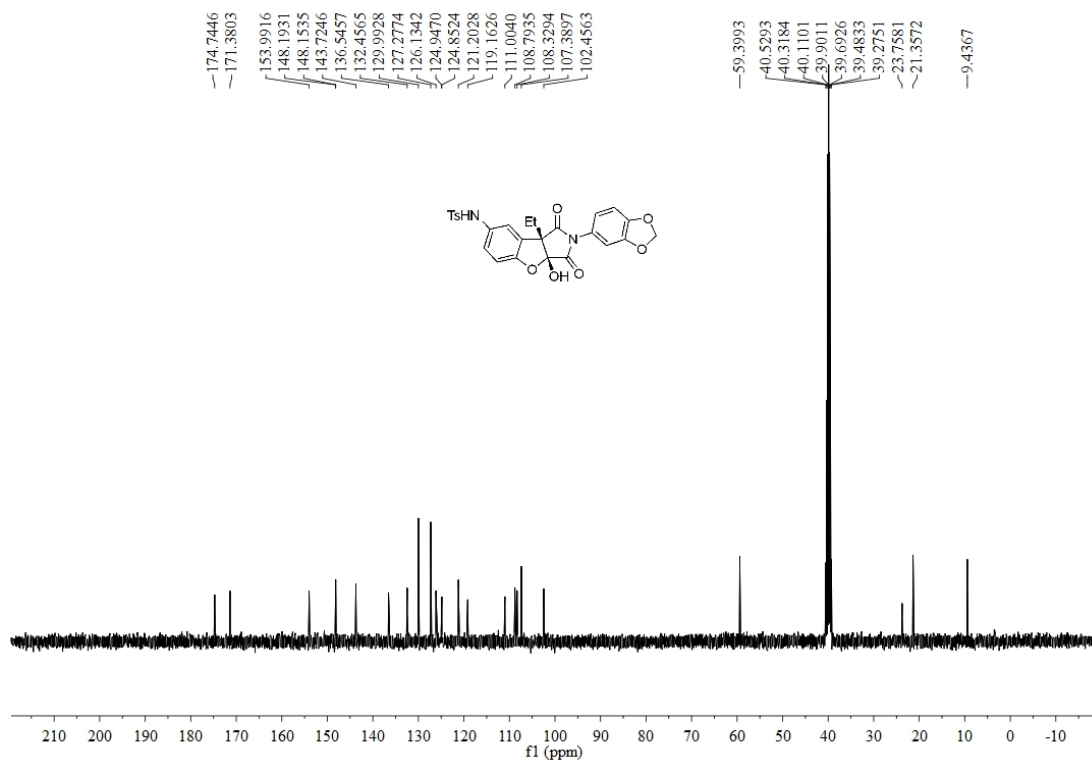



***N*-((3*aR*,8*bS*)-2-benzyl-8*b*-ethyl-3*a*-hydroxy-1,3-dioxo-2,3,3*a*,8*b*-tetrahydro-1*H*-benzofuro[2,3-*c*]pyrrol-7-yl)-4-methylbenzenesulfonamide (3*oa*):**

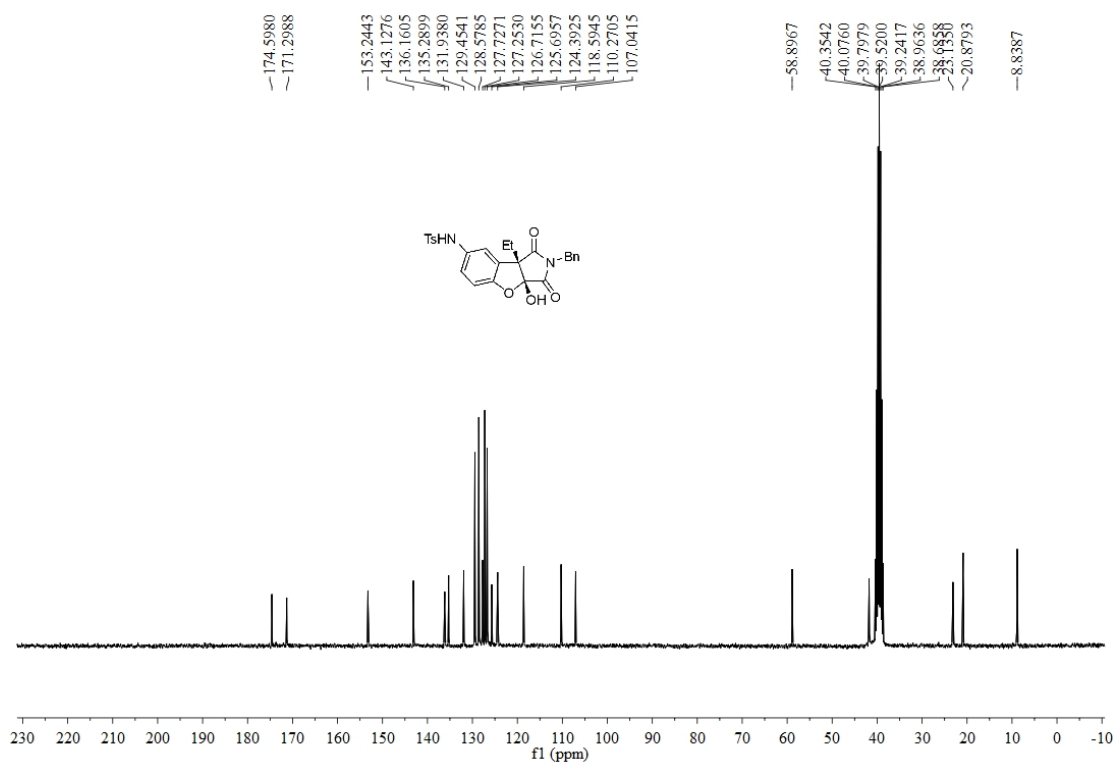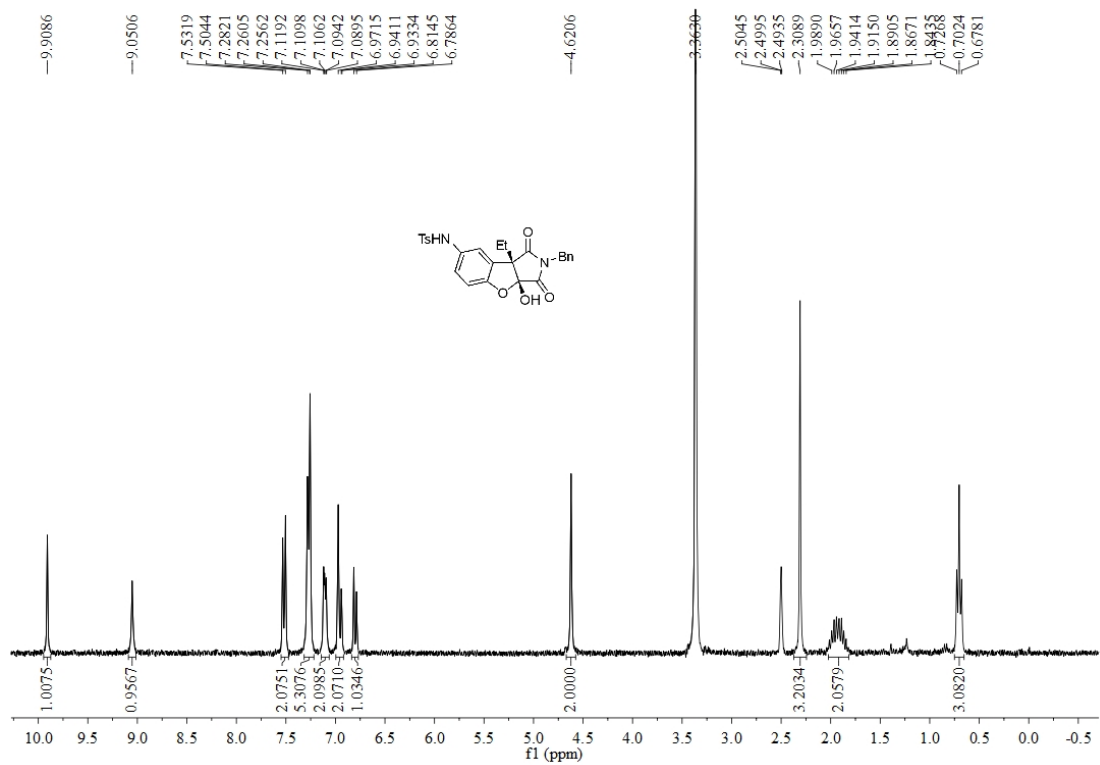

***N*-((3*aR*,8*bS*)-8*b*-ethyl-3*a*-hydroxy-1,3-dioxo-2,3,3*a*,8*b*-tetrahydro-1*H*-benzofuro[2,3-*c*]pyrrol-7-yl)-4-methyl benzenesulfonamide (3*pa*):**

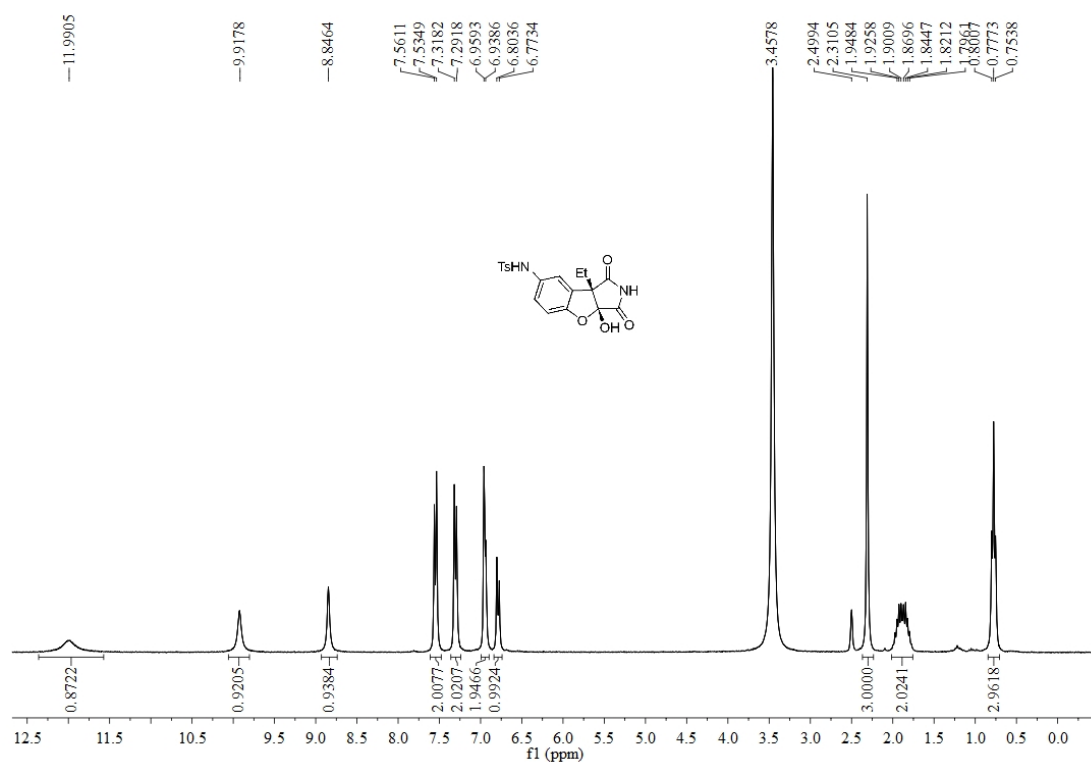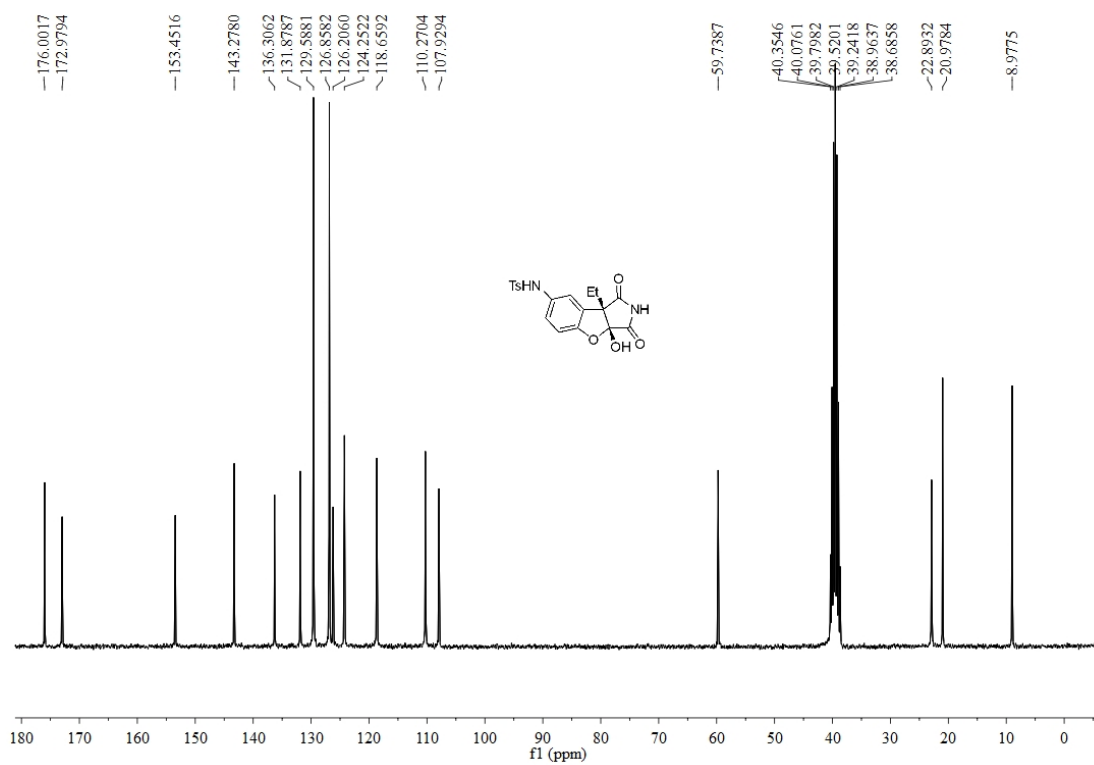

***N*-((3*aR*,8*bS*)-3*a*-hydroxy-2-(4-methoxyphenyl)-8*b*-methyl-1,3-dioxo-2,3,3*a*,8*b*-tetrahydro-1*H*-benzo-furo[2,3-*c*]pyrrol-7-yl)-4-methylbenzenesulfonamide (3*qa*):**

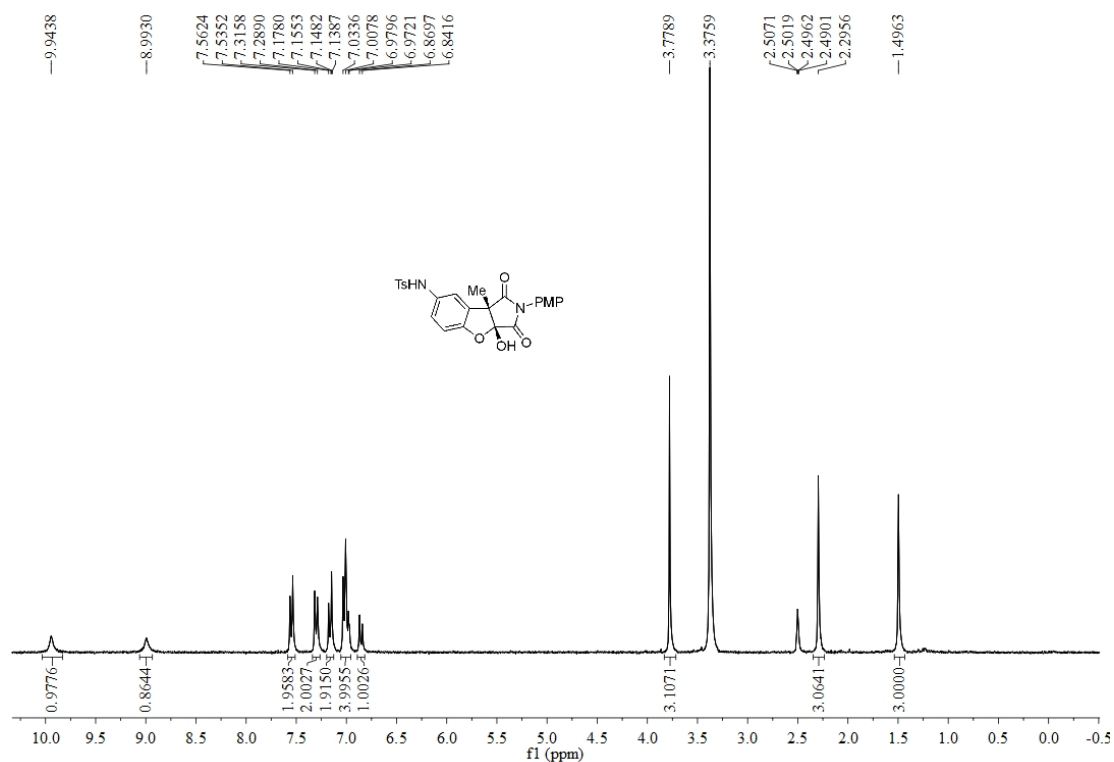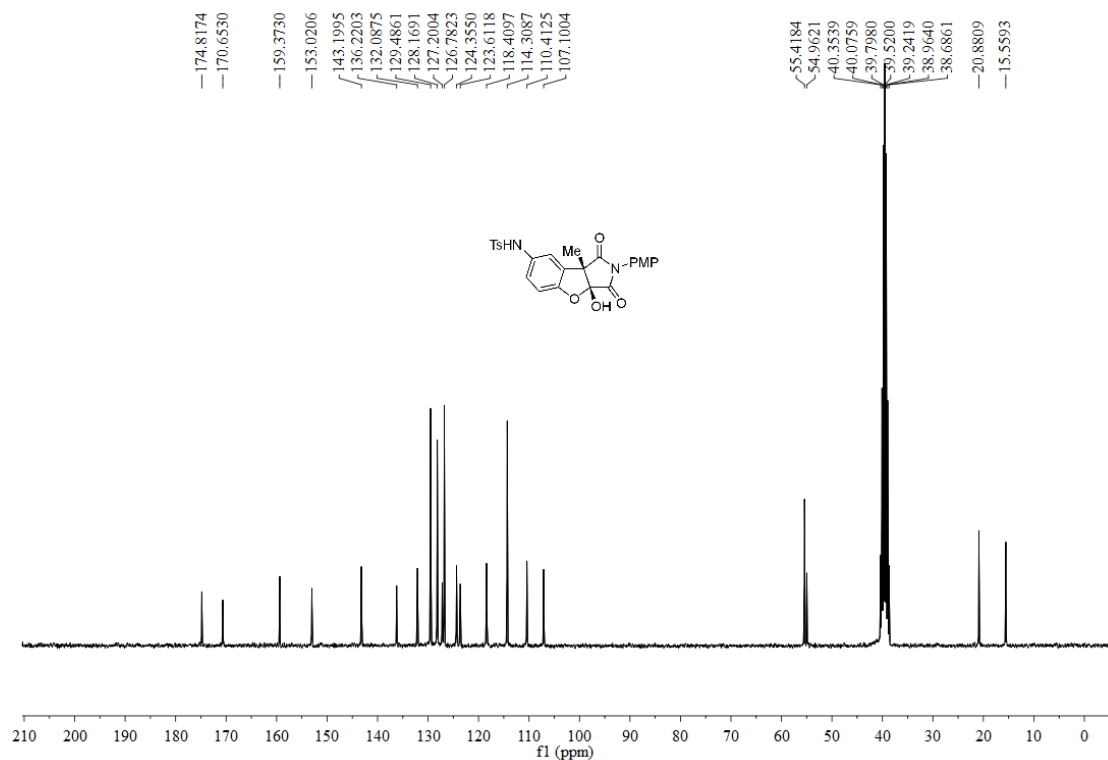

***N*-((3*aR*,8*bS*)-3*a*-hydroxy-2-(4-methoxyphenyl)-1,3-dioxo-8*b*-propyl-2,3,3*a*,8*b*-tetrahydro-1*H*-benzofuro[2,3-*c*]pyrrol-7-yl)-4-methylbenzenesulfonamide (3*a*):**

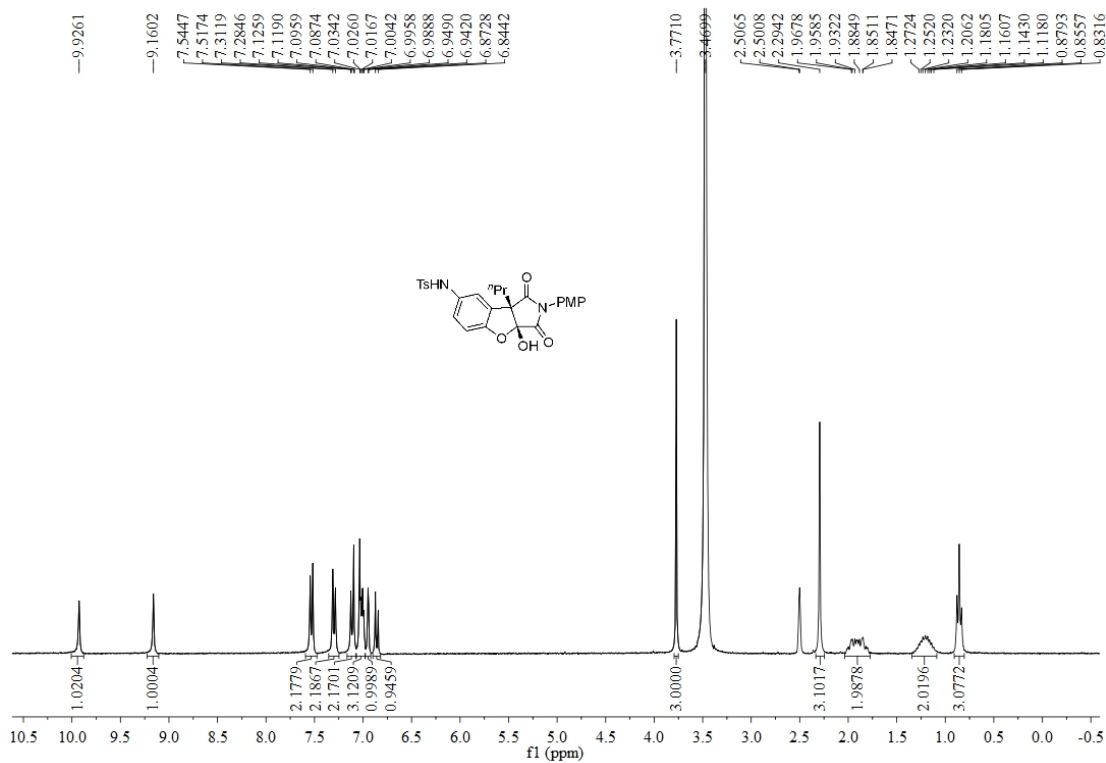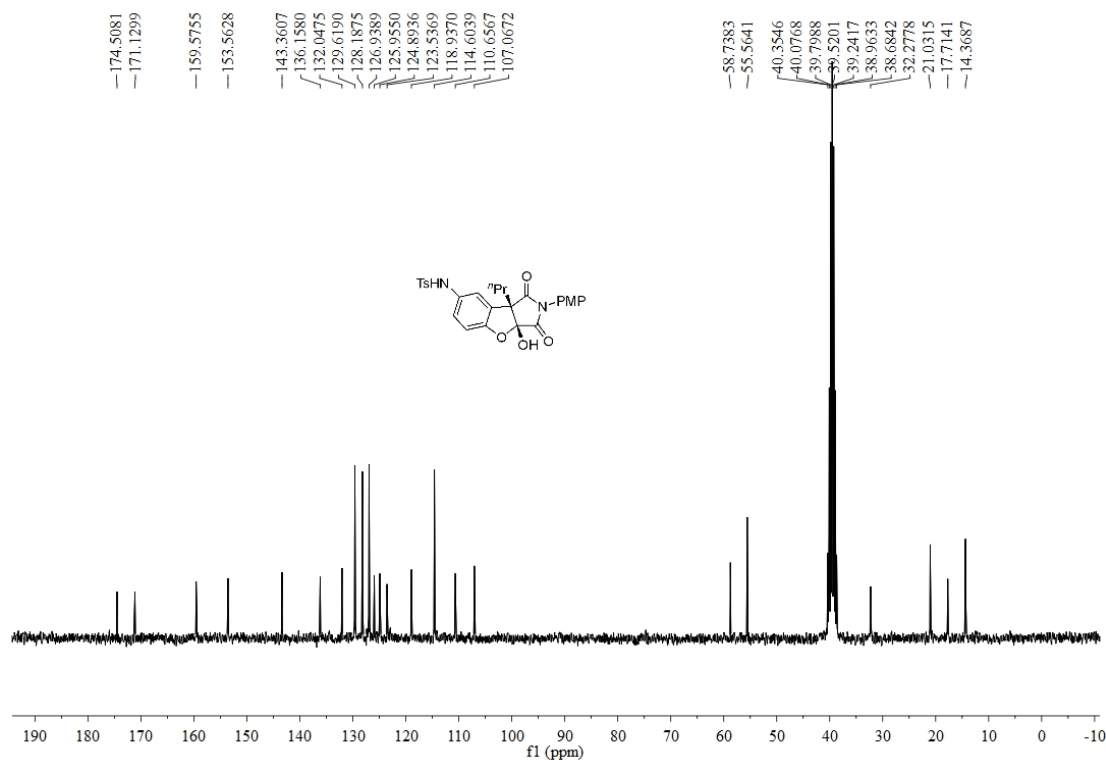

***N*-((3*aR*,8*bS*)-8*b*-benzyl-3*a*-hydroxy-2-(4-methoxyphenyl)-1,3-dioxo-2,3,3*a*,8*b*-tetrahydro-1*H*-benzofuro[2,3-*c*]pyrrol-7-yl)-4-methylbenzenesulfonamide (3*sa*):**

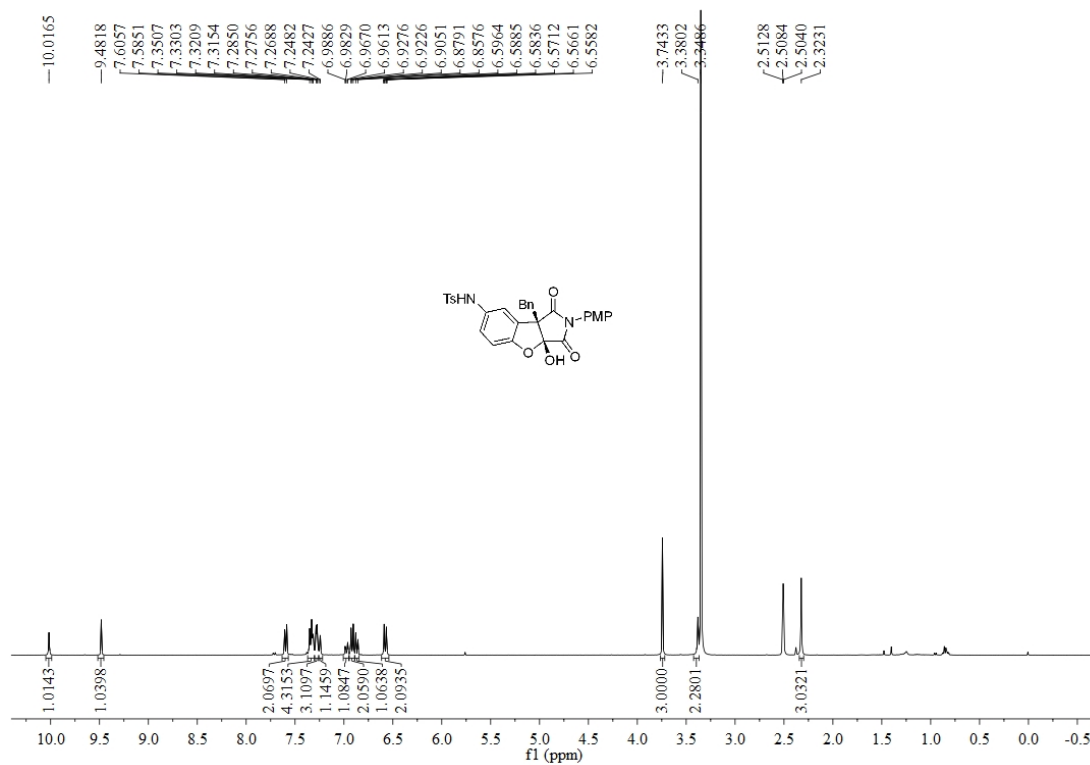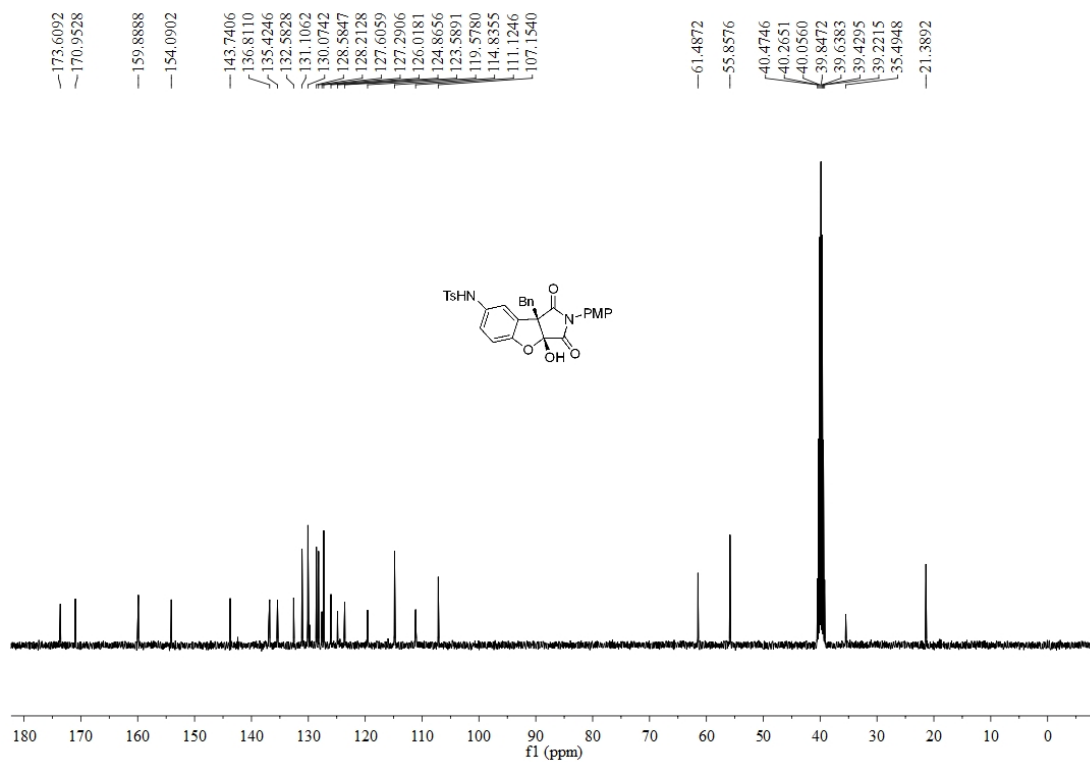

***N*-((3*aR*,8*bS*)-3*a*-hydroxy-2-(4-methoxyphenyl)-1,3-dioxo-8*b*-phenyl-2,3,3*a*,8*b*-tetrahydro-1*H*-benzofuro[2,3-*c*]pyrrol-7-yl)-4-methylbenzenesulfonamide (3*ta*):**

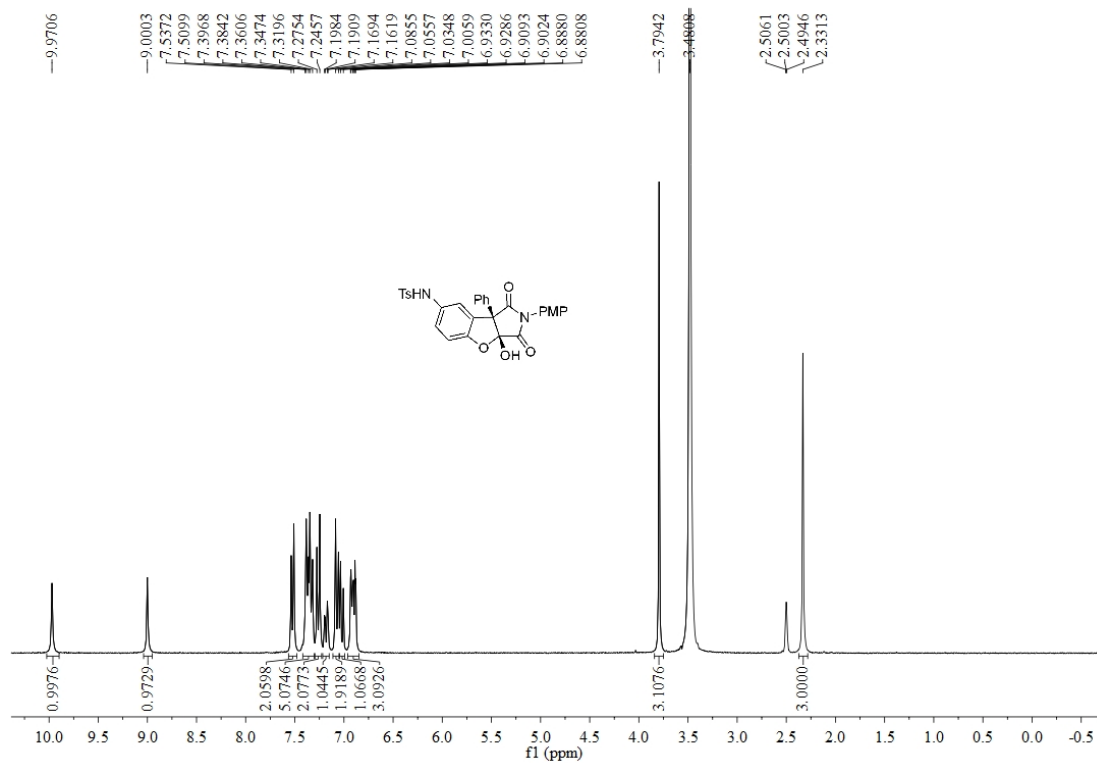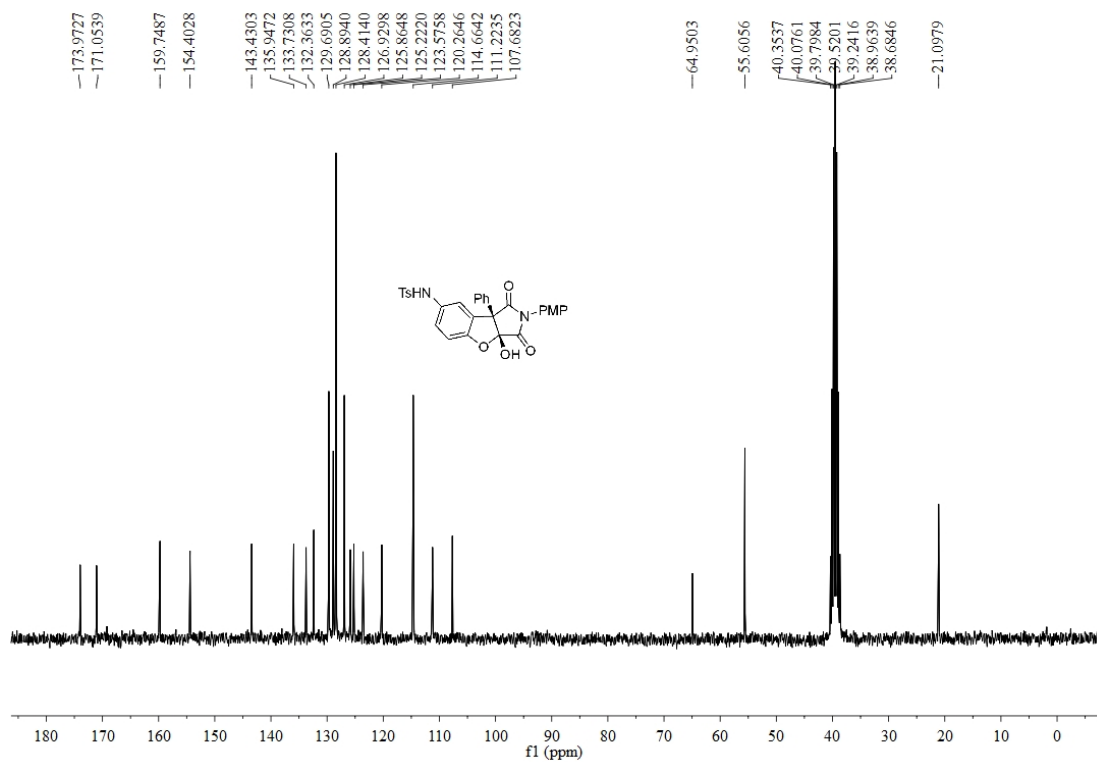

***N*-((3*aR*,8*bS*)-3*a*-hydroxy-2-(4-methoxyphenyl)-1,3-dioxo-8*b*-phenyl-2,3,3*a*,8*b*-tetrahydro-1*H*-benzofuro[2,3-*c*]pyrrol-7-yl)-4-methoxybenzenesulfonamide (3*ab*):**

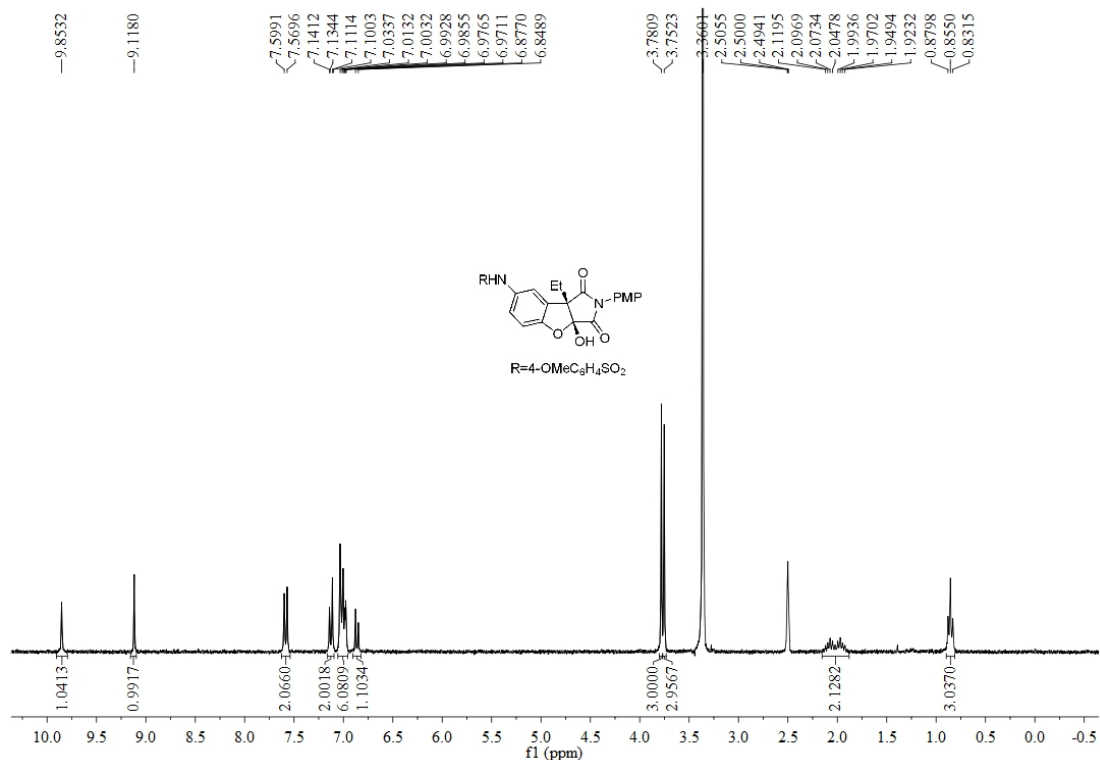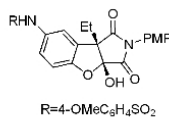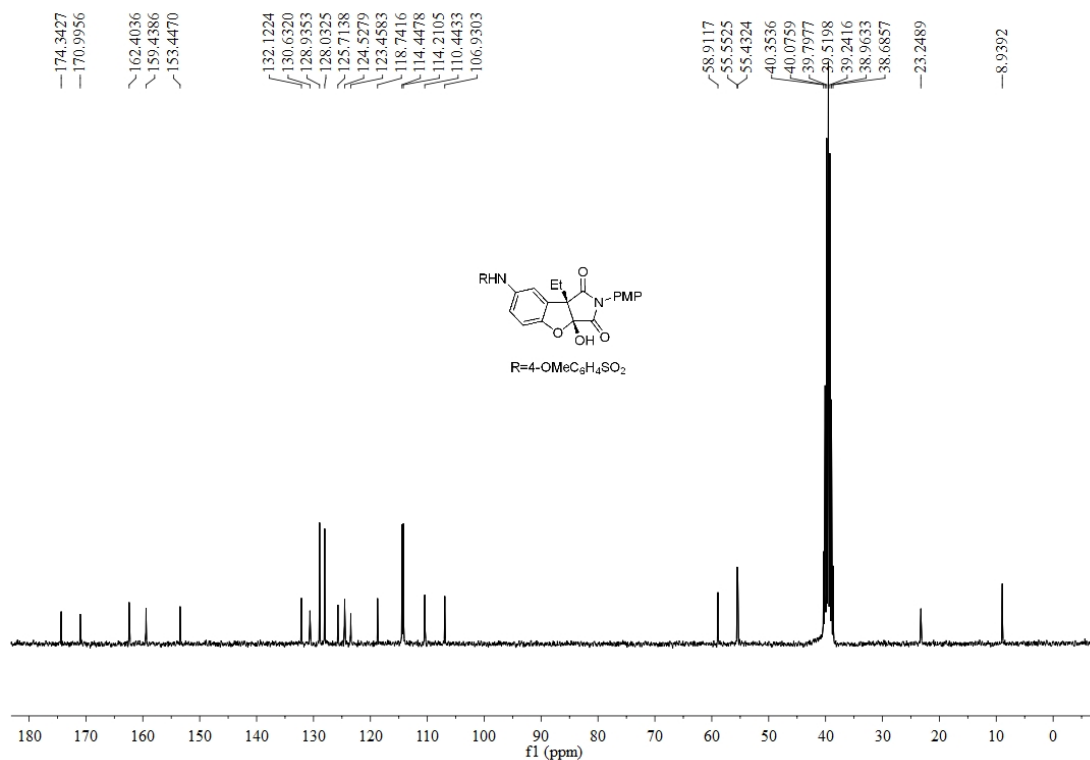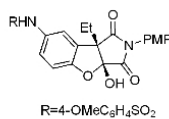

***N*-((3*aR*,8*bS*)-3*a*-hydroxy-2-(4-methoxyphenyl)-1,3-dioxo-8*b*-phenyl-2,3,3*a*,8*b*-tetrahydro-1*H*-benzofuro[2,3-*c*]pyrrol-7-yl)-4-nitrobenzenesulfonamide (3*a*):**

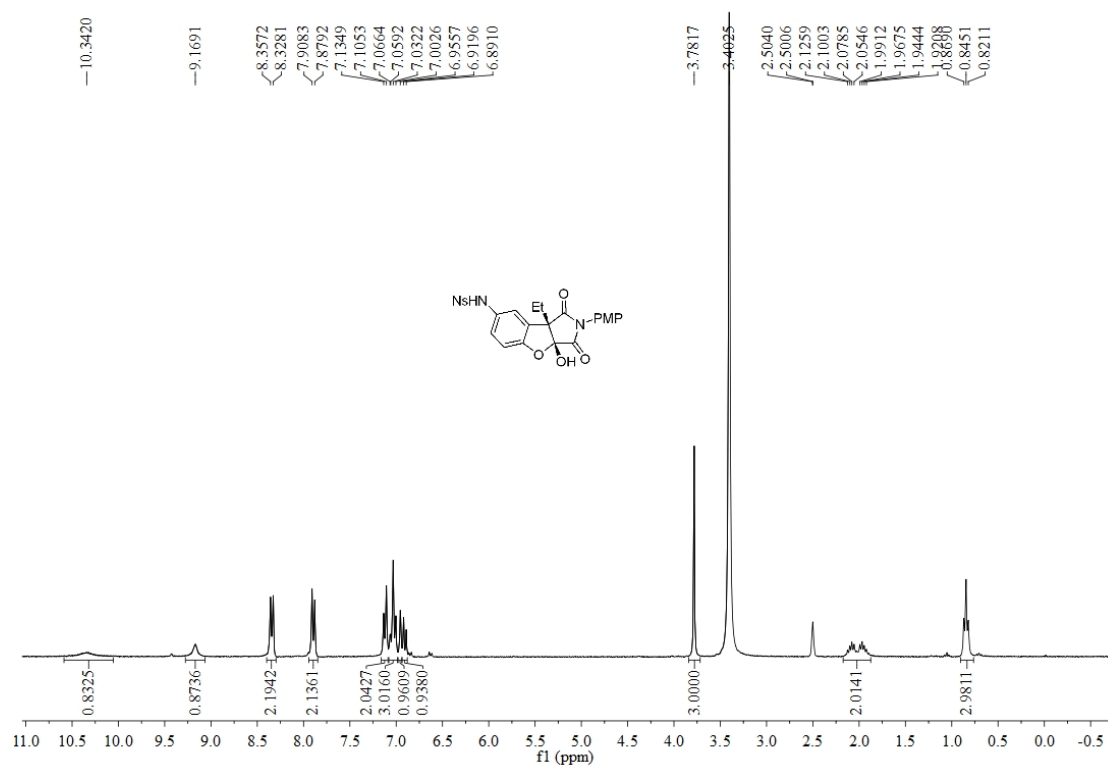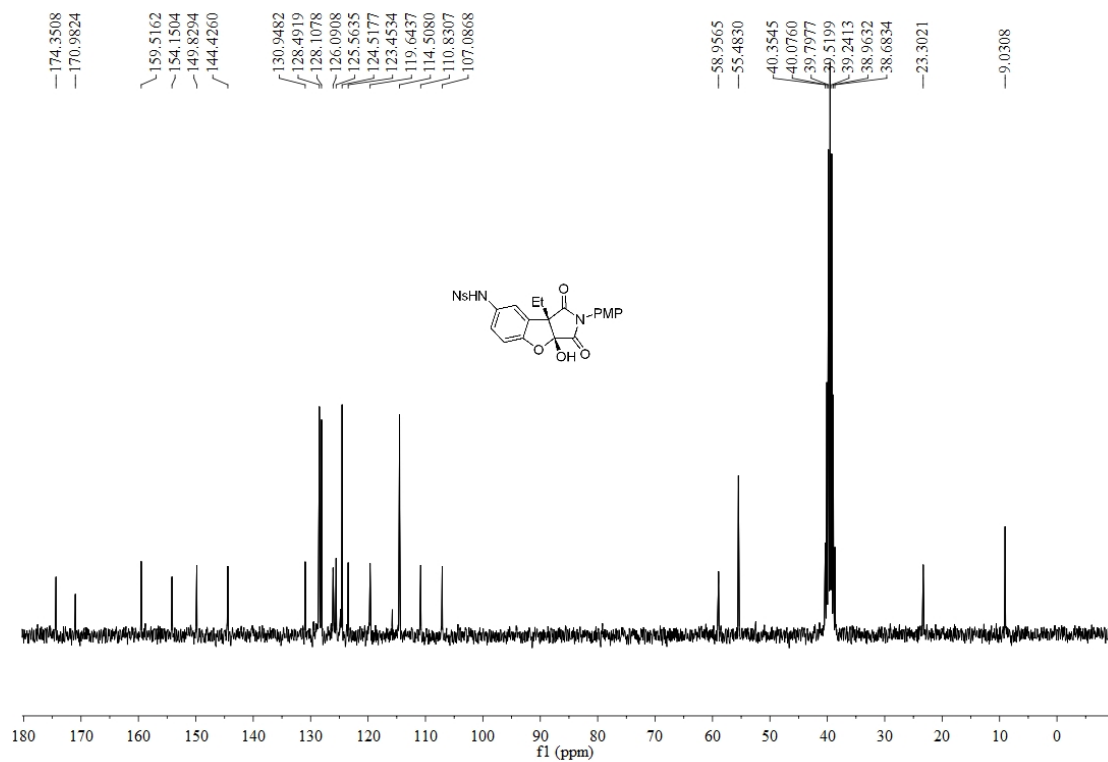



***N*-((3*aR*,8*bS*)-3*a*-hydroxy-2-(4-methoxyphenyl)-1,3-dioxo-8*b*-phenyl-2,3,3*a*,8*b*-tetrahydro-1*H*-benzofuro[2,3-*c*]pyrrol-7-yl)benzenesulfonamide (3*ad*):**

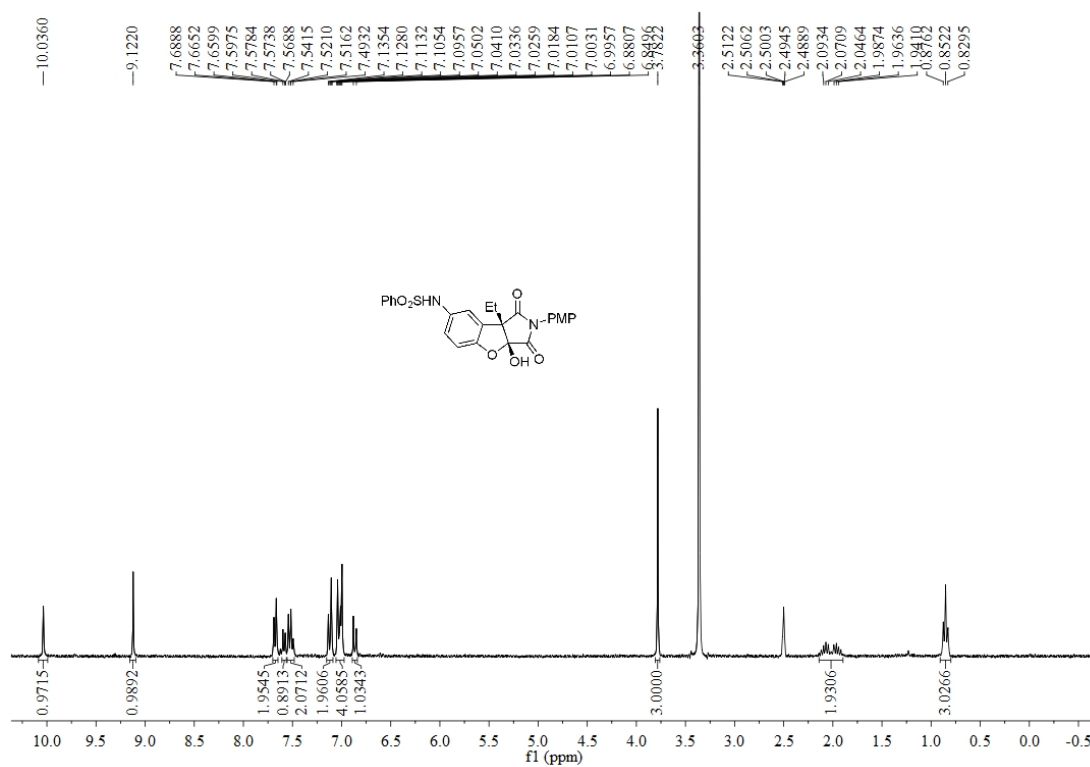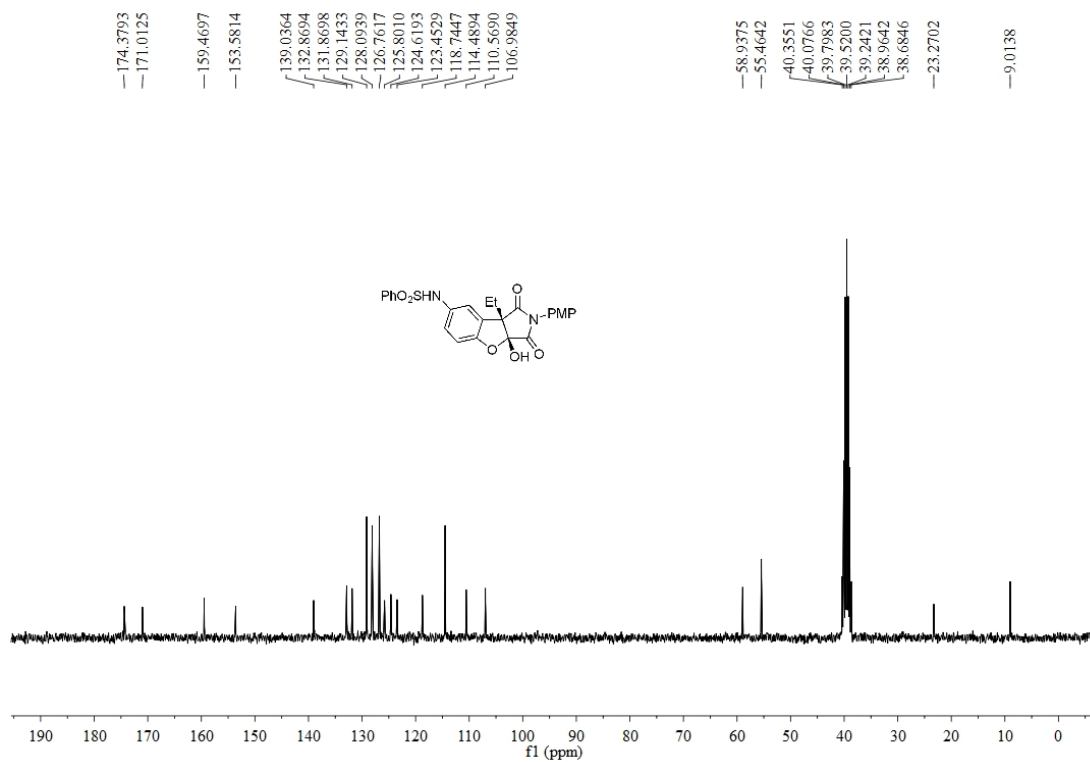

***N*-((3*aR*,8*bS*)-3*a*-hydroxy-2-(4-methoxyphenyl)-1,3-dioxo-8*b*-phenyl-2,3,3*a*,8*b*-tetrahydro-1*H*-benzofuro[2,3-*c*]pyrrol-7-yl)methanesulfonamide (3*ae*):**

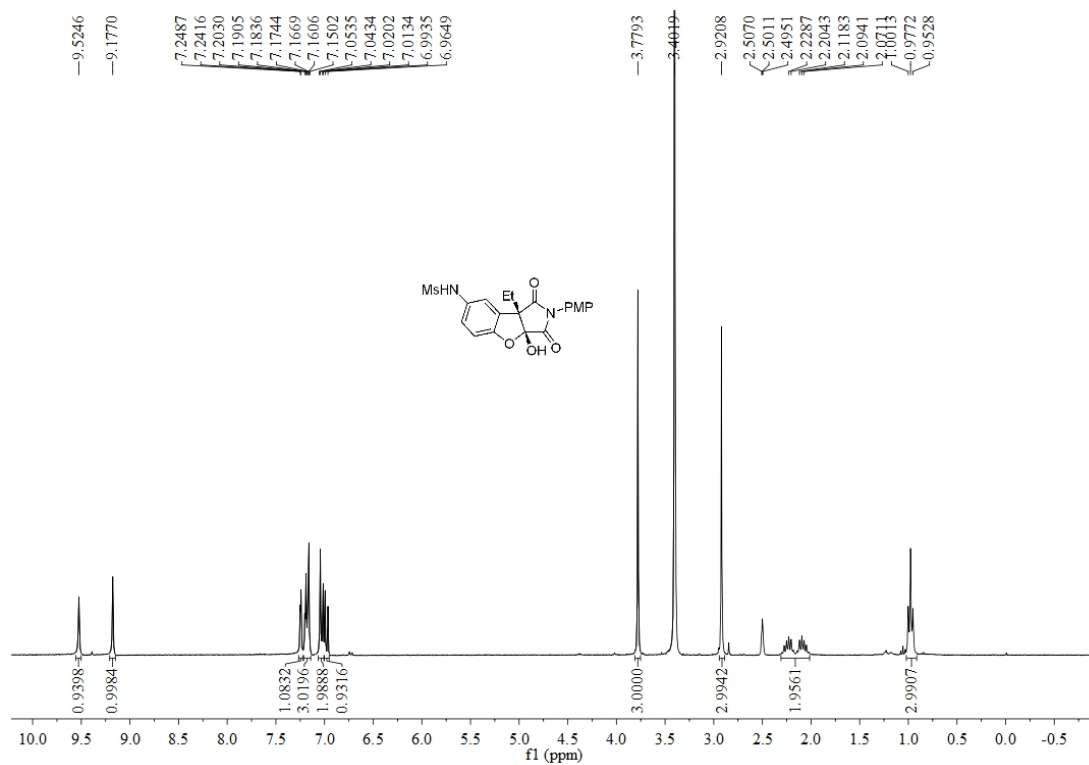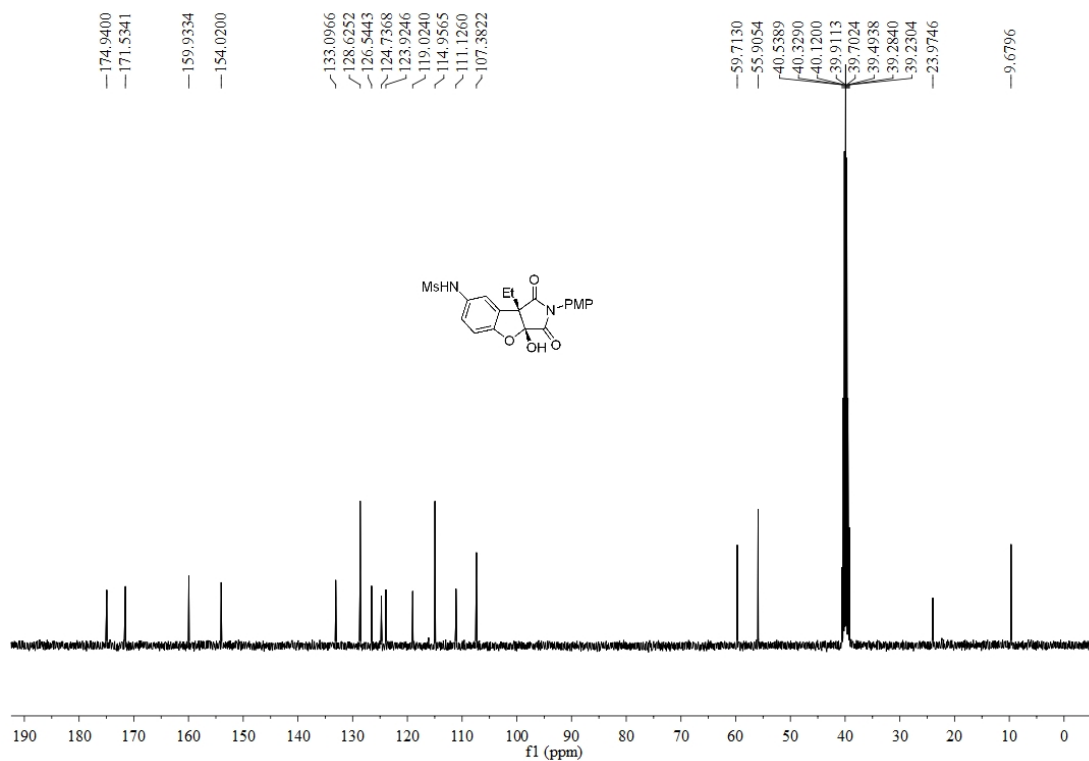

***N*-((3*aR*,8*bS*)-6-chloro-3*a*-hydroxy-2-(4-methoxyphenyl)-1,3-dioxo-8*b*-phenyl-2,3,3*a*,8*b*-tetrahydro-1*H*-benzofuro[2,3-*c*]pyrrol-7-yl)-4-methylbenzenesulfonamide (3af):**

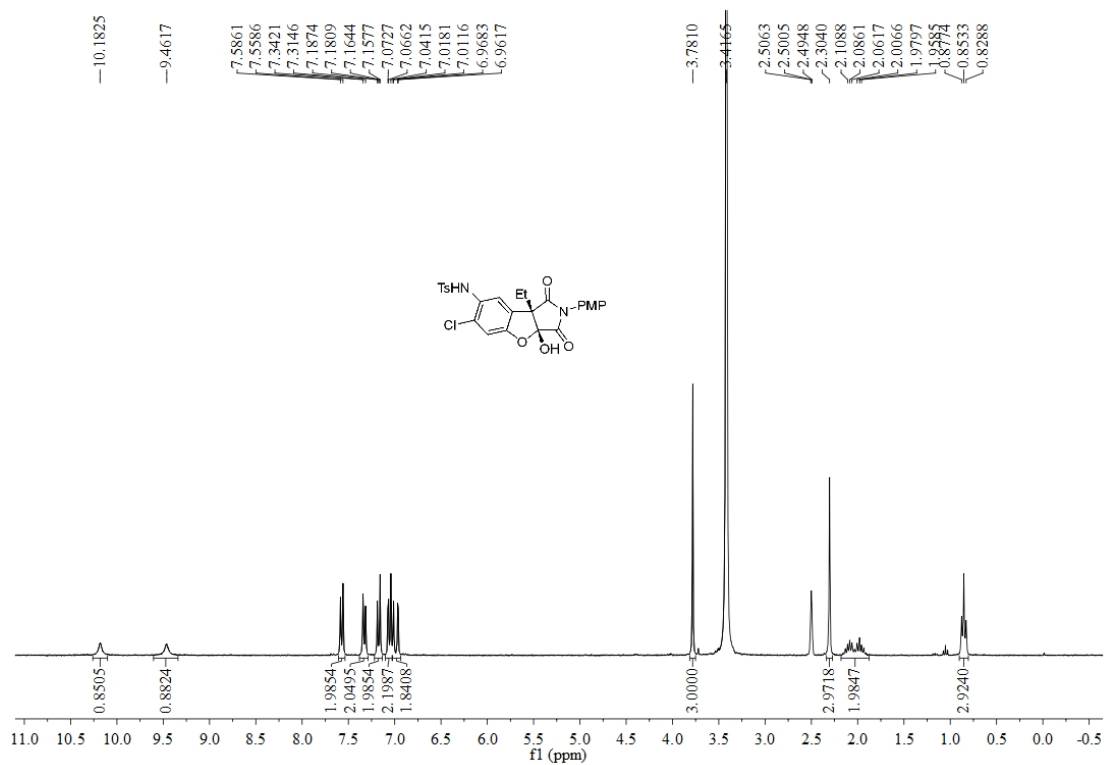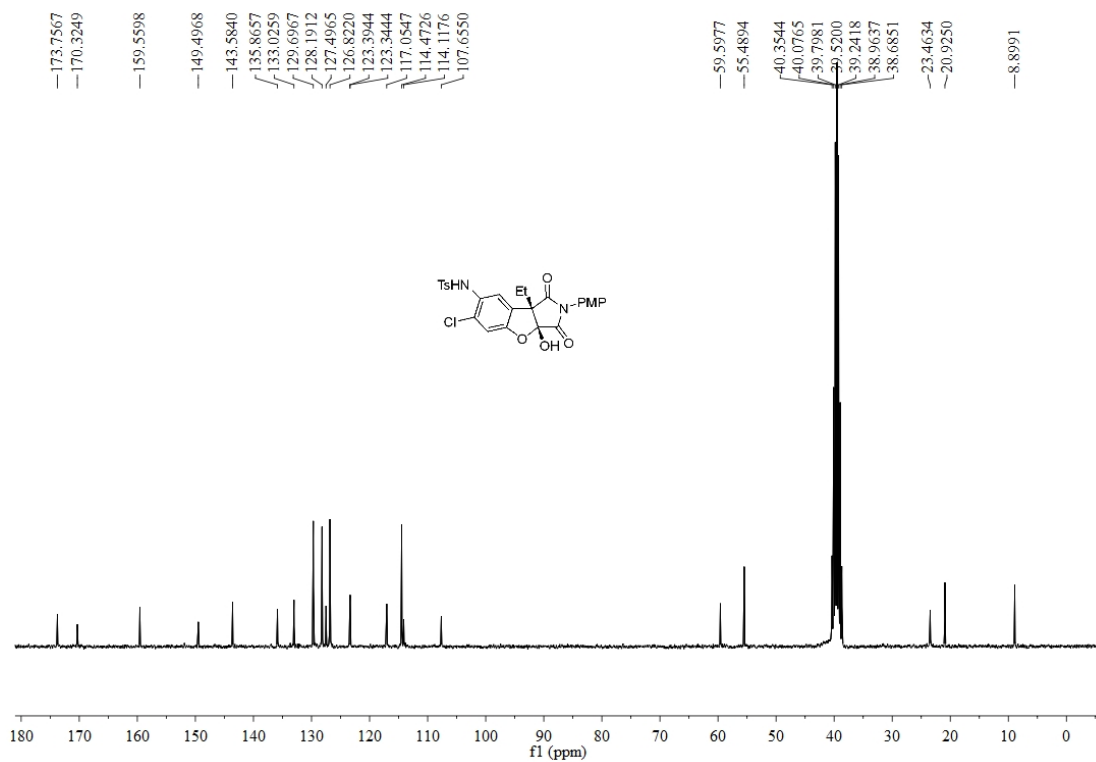

***N*-((3*aR*,8*bS*)-5-chloro-3*a*-hydroxy-2-(4-methoxyphenyl)-1,3-dioxo-8*b*-phenyl-2,3,3*a*,8*b*-tetrahydro-1*H*-benzofuro[2,3-*c*]pyrrol-7-yl)-4-methylbenzenesulfonamide (**3ag**):**

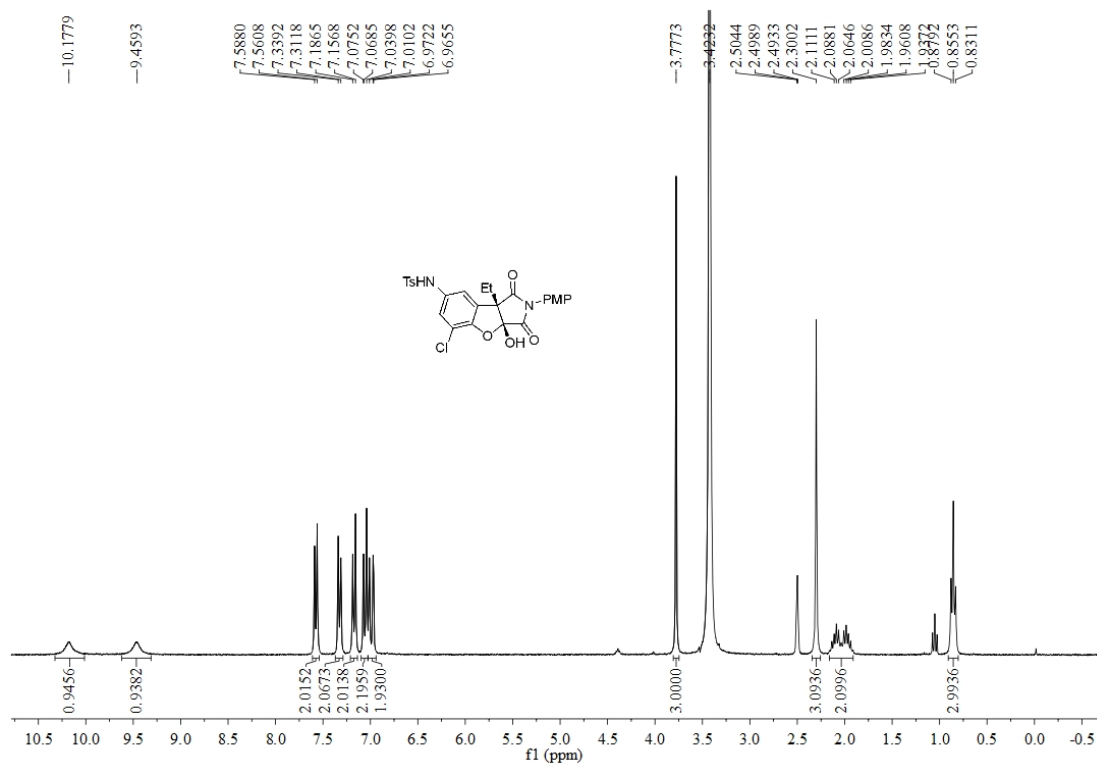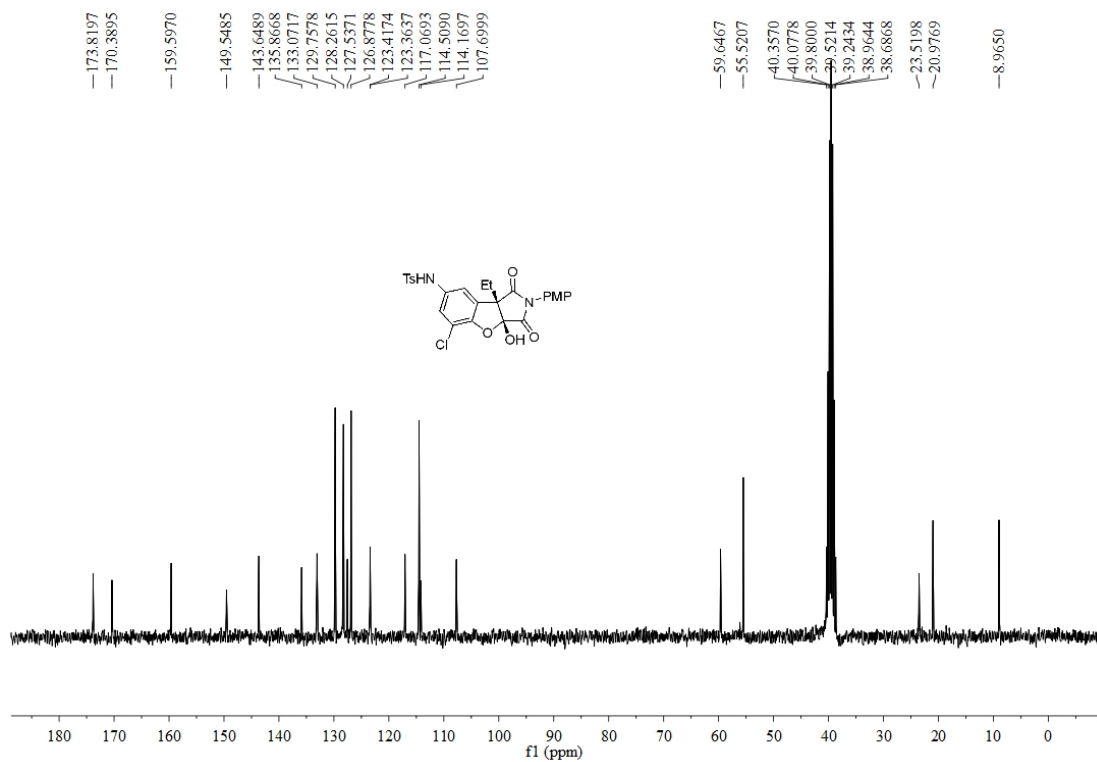

***N*-((3*aR*,8*bS*)-5-bromo-3*a*-hydroxy-2-(4-methoxyphenyl)-1,3-dioxo-8*b*-phenyl-2,3,3*a*,8*b*-tetrahydro-1*H*-benzofuro[2,3-*c*]pyrrol-7-yl)-4-methylbenzenesulfonamide (3*ah*):**

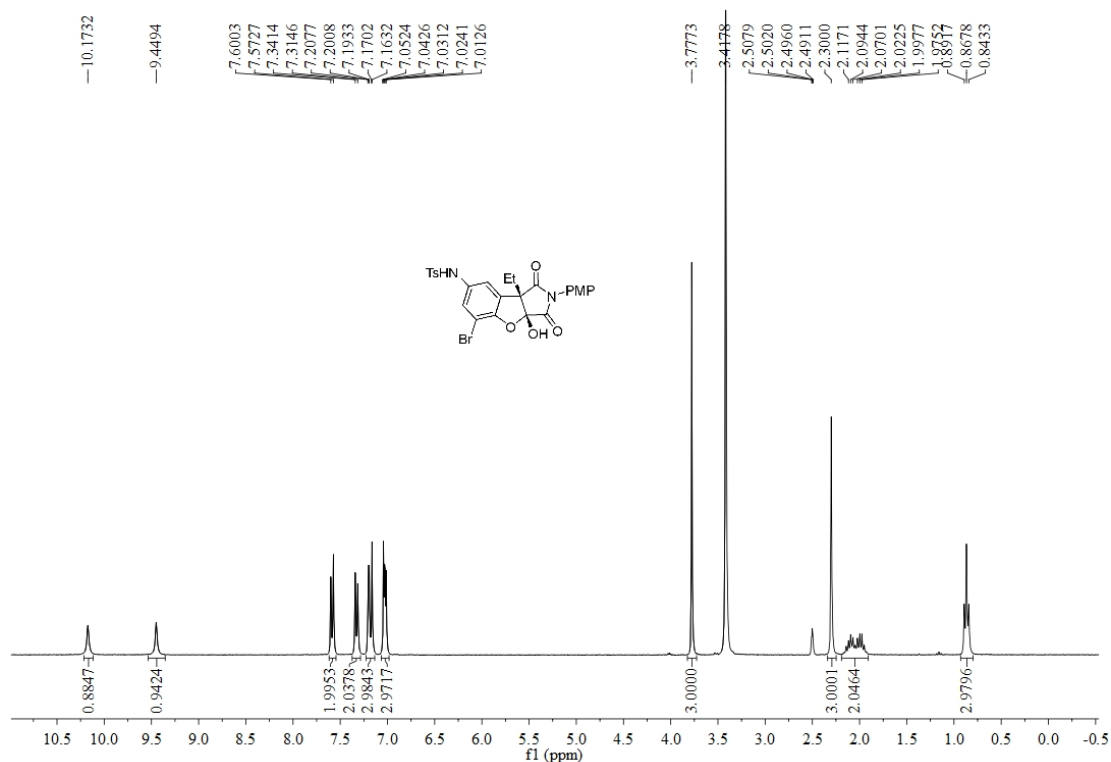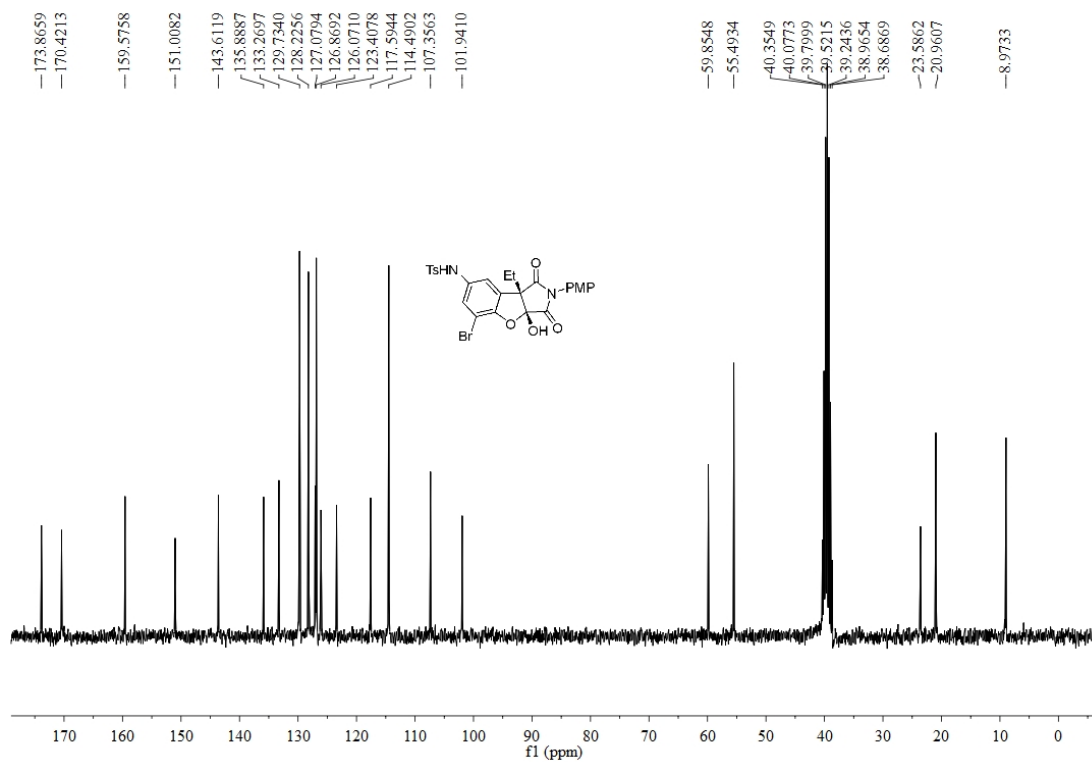

***N*-((3*aR*,8*bS*)-3*a*-hydroxy-2-(4-methoxyphenyl)-5-methyl-1,3-dioxo-8*b*-phenyl-2,3,3*a*,8*b*-tetrahydro-1*H*-benzofuro[2,3-*c*]pyrrol-7-yl)-4-methylbenzenesulfonamide (3*ai*):**

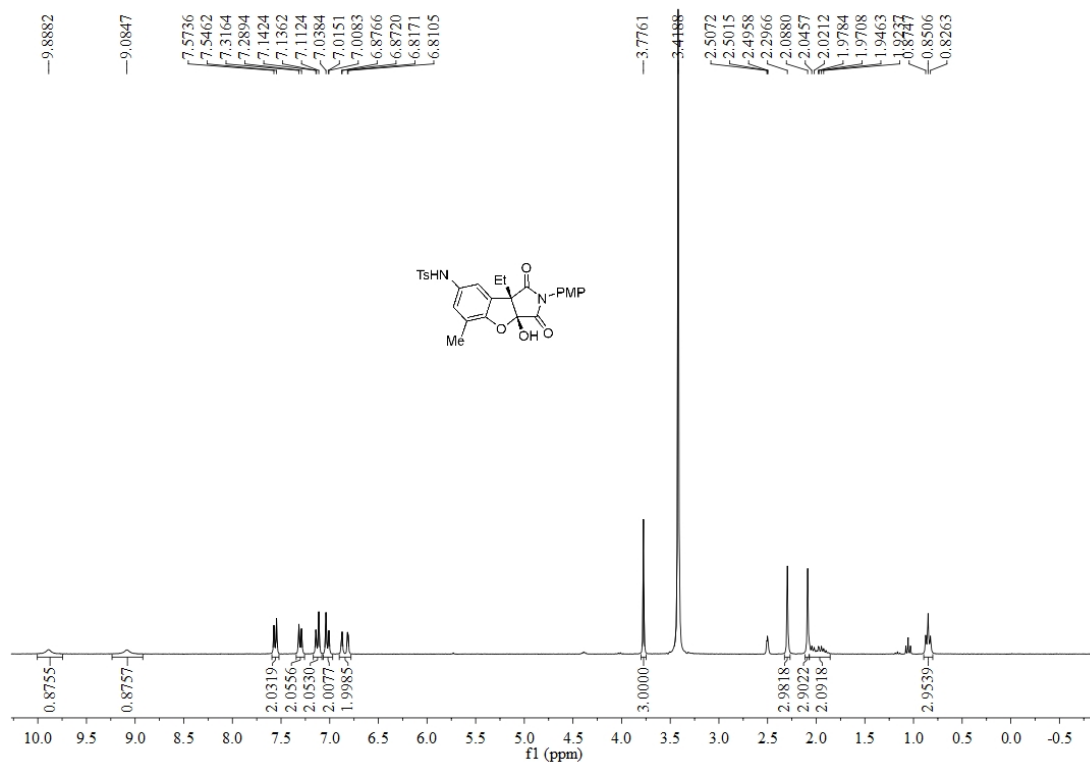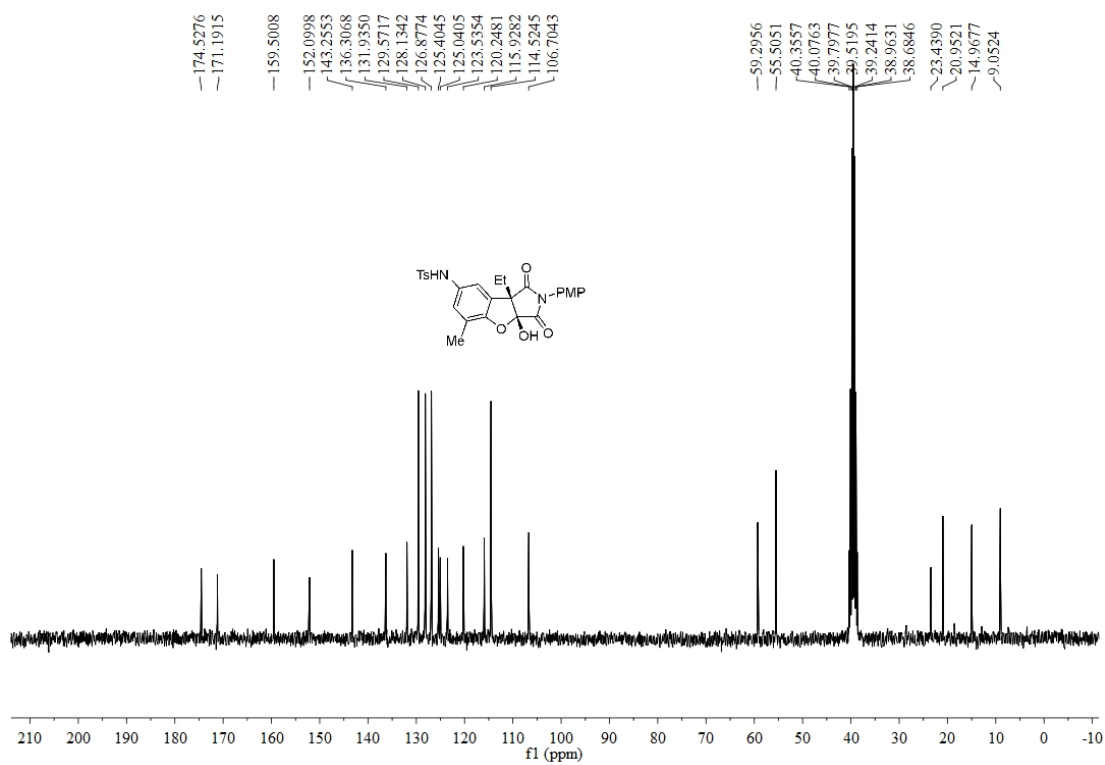

***N*-((3*aR*,8*bS*)-3*a*-hydroxy-5-methoxy-2-(4-methoxyphenyl)-1,3-dioxo-8*b*-phenyl-2,3,3*a*,  
8*b*-tetrahydro-1*H*-benzofuro[2,3-*c*]pyrrol-7-yl)-4-methylbenzenesulfonamide (3*aj*):**

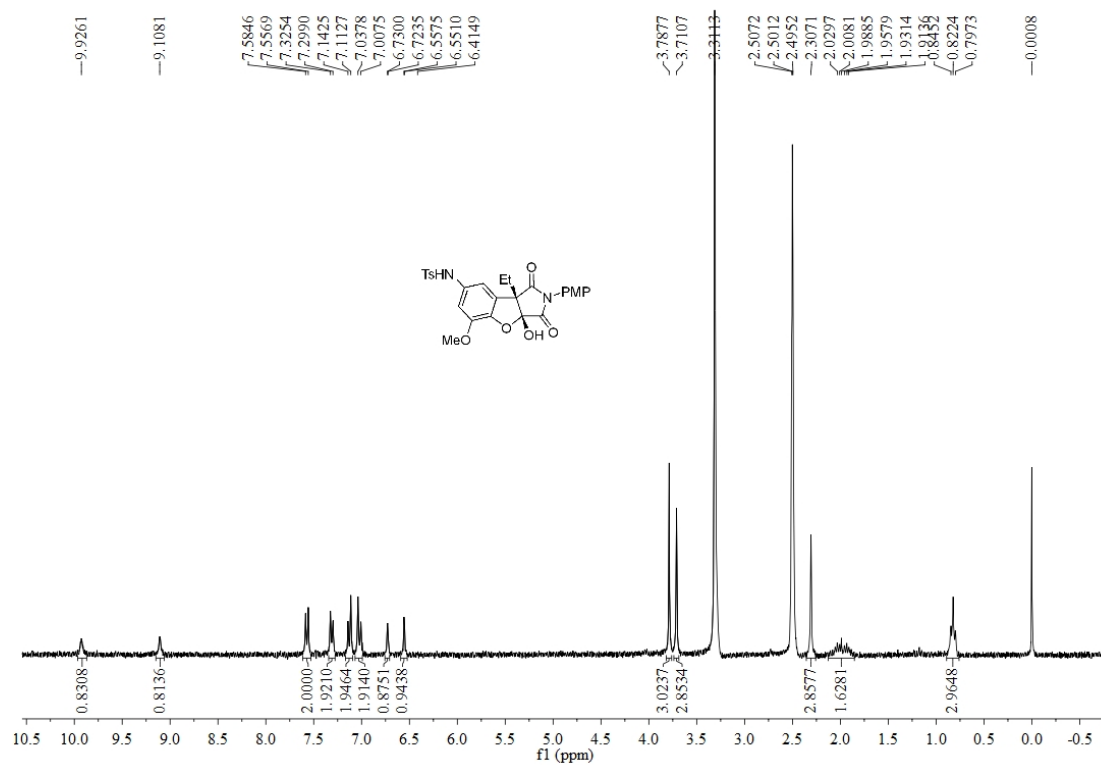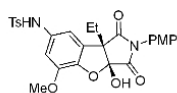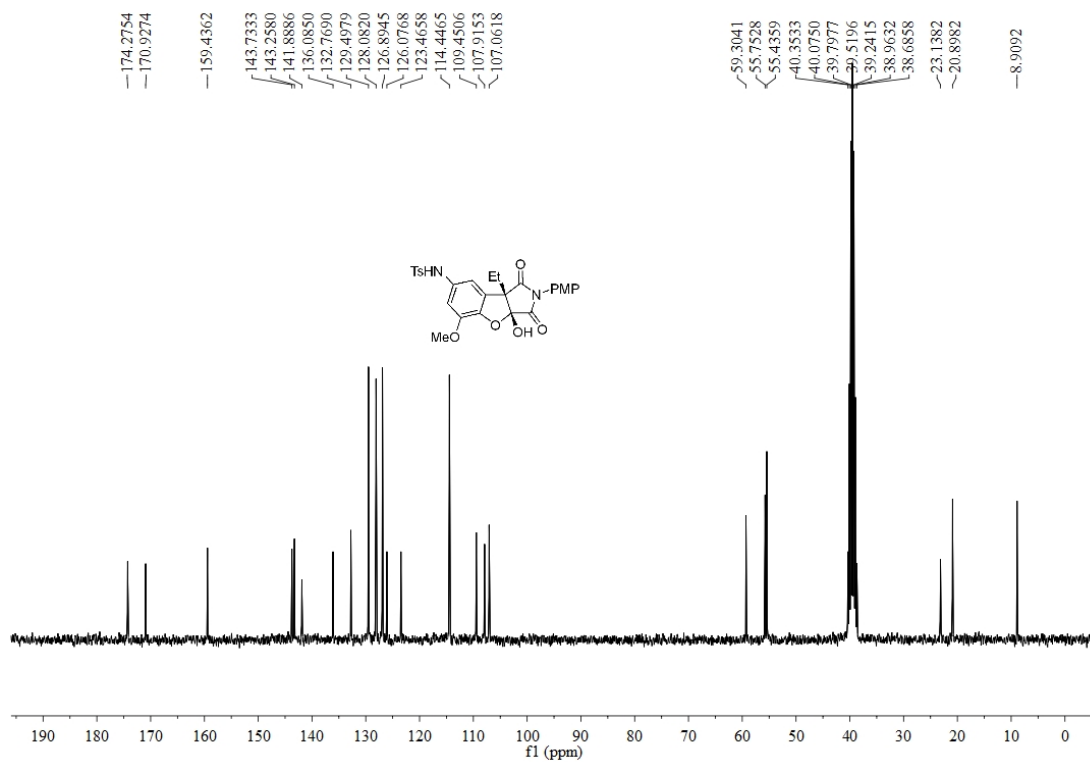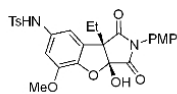

## HPL chart of Products

### *N*-((3*aR*,8*bS*)-8*b*-ethyl-3*a*-hydroxy-2-(4-methoxyphenyl)-1,3-dioxo-2,3,3*a*,8*b*-tetrahydro-1*H*-benzofuro[2,3-*c*]pyrrol-7-yl)-4-methylbenzenesulfonamide (3*aa*)

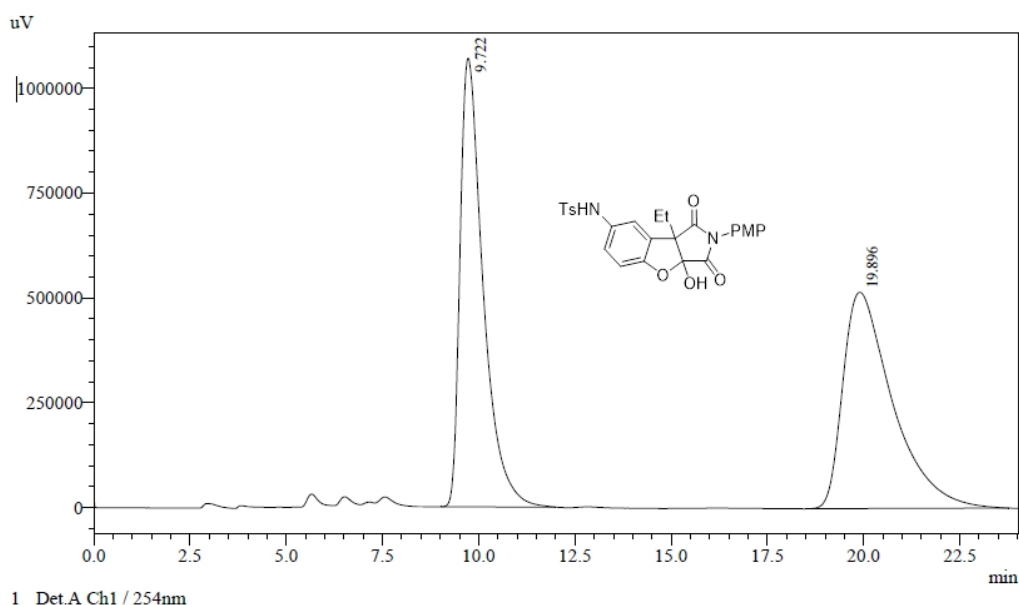

Detector A Ch1 254nm

| Peak# | Ret. Time | Area     | Height  | Area %  | Height % |
|-------|-----------|----------|---------|---------|----------|
| 1     | 9.722     | 44672063 | 1070386 | 49.137  | 67.474   |
| 2     | 19.896    | 46240701 | 515990  | 50.863  | 32.526   |
| Total |           | 90912764 | 1586377 | 100.000 | 100.000  |

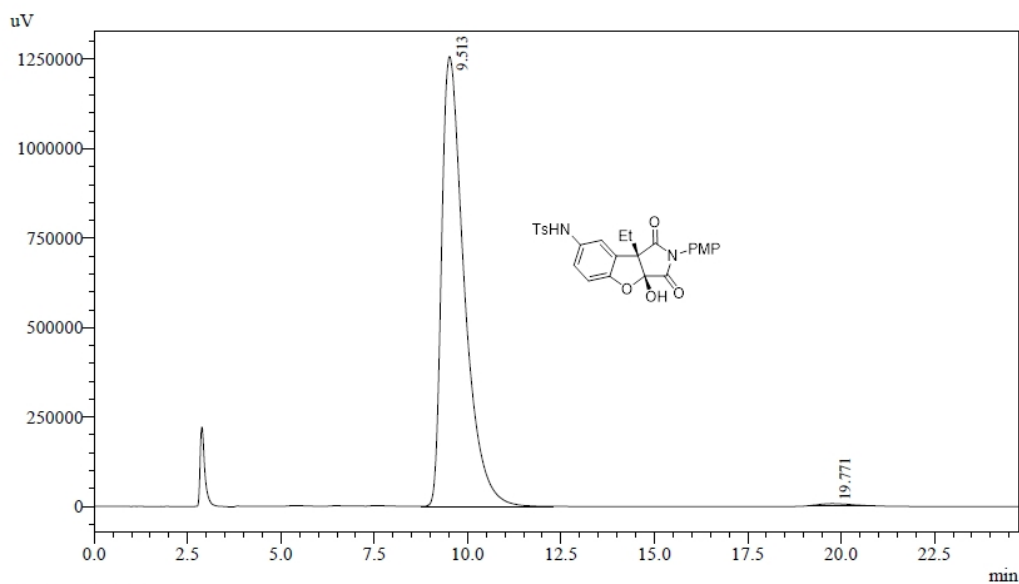

Detector A Ch1 254nm

| Peak# | Ret. Time | Area     | Height  | Area %  | Height % |
|-------|-----------|----------|---------|---------|----------|
| 1     | 9.513     | 52987068 | 1257972 | 99.414  | 99.552   |
| 2     | 19.771    | 312486   | 5655    | 0.586   | 0.448    |
| Total |           | 53299554 | 1263627 | 100.000 | 100.000  |



***N*-((3*aR*,8*bS*)-8*b*-ethyl-3*a*-hydroxy-1,3-dioxo-2-phenyl-2,3,3*a*,8*b*-tetrahydro-1*H*-benzofuro[2,3-*c*]pyrrol-7-yl)-4-methylbenzenesulfonamide (3*ba*):**

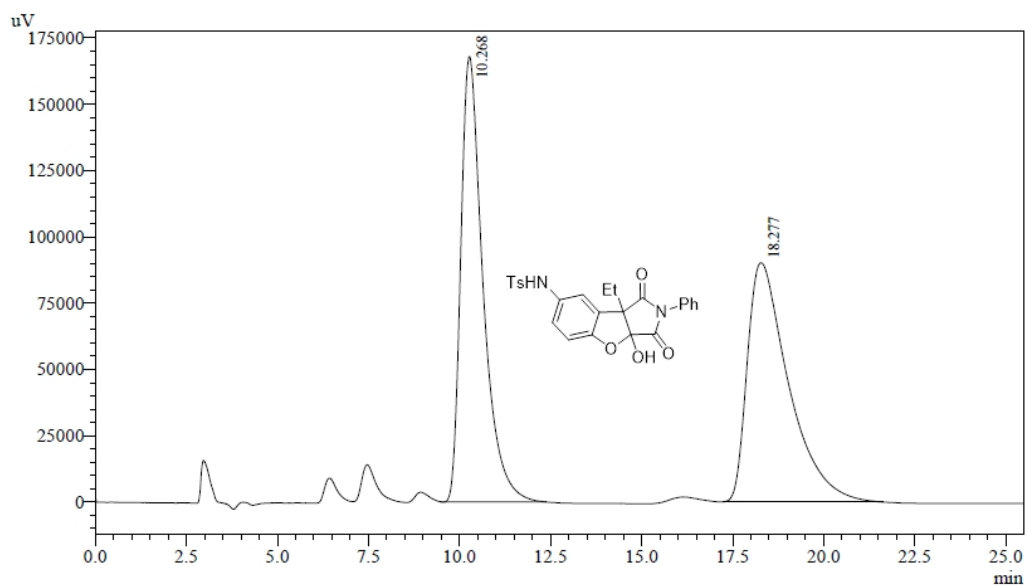

1 Det.A Ch1 / 254nm

Detector A Ch1 254nm

| Peak# | Ret. Time | Area     | Height | Area %  | Height % |
|-------|-----------|----------|--------|---------|----------|
| 1     | 10.268    | 7119107  | 167928 | 50.051  | 65.043   |
| 2     | 18.277    | 7104531  | 90251  | 49.949  | 34.957   |
| Total |           | 14223638 | 258179 | 100.000 | 100.000  |

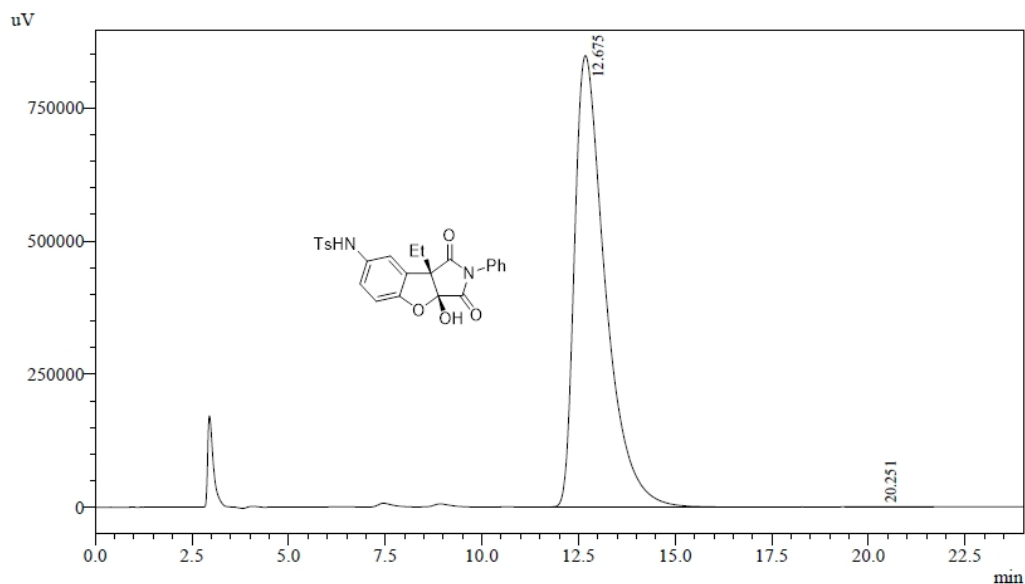

1 Det.A Ch1 / 254nm

Detector A Ch1 254nm

| Peak# | Ret. Time | Area     | Height | Area %  | Height % |
|-------|-----------|----------|--------|---------|----------|
| 1     | 12.675    | 46770083 | 847854 | 99.984  | 99.984   |
| 2     | 20.251    | 7313     | 138    | 0.016   | 0.016    |
| Total |           | 46777396 | 847992 | 100.000 | 100.000  |

***N*-((3*aR*,8*bS*)-8*b*-ethyl-3*a*-hydroxy-1,3-dioxo-2-(*p*-tolyl)-2,3,3*a*,8*b*-tetrahydro-1*H*-benzofuro[2,3-*c*]pyrrol-7-yl)-4-methylbenzenesulfonamide (3*ca*):**

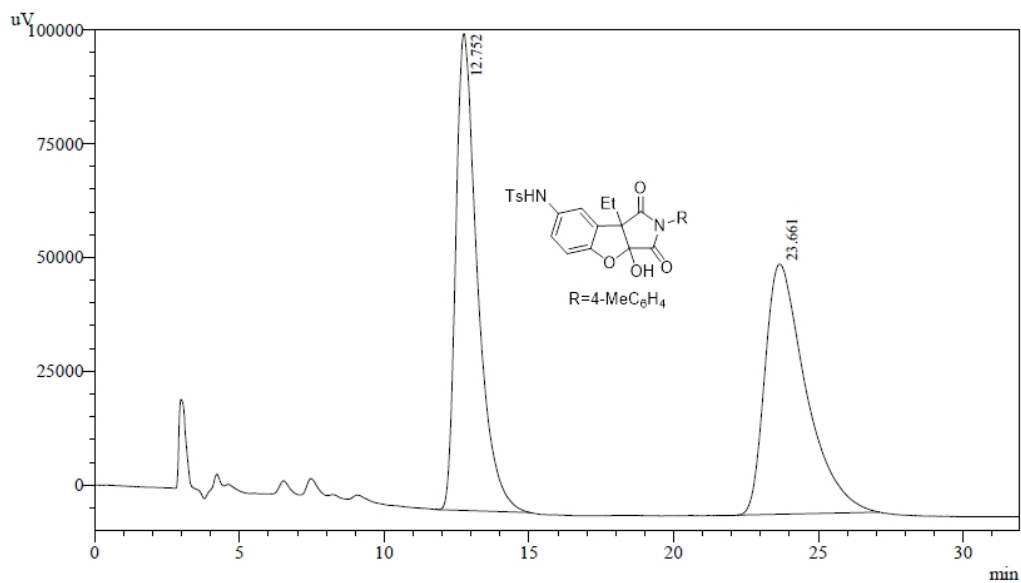

1 Det.A Ch1 / 254nm

Detector A Ch1 254nm

| Peak# | Ret. Time | Area     | Height | Area %  | Height % |
|-------|-----------|----------|--------|---------|----------|
| 1     | 12.752    | 5472626  | 104740 | 50.287  | 65.586   |
| 2     | 23.661    | 5410201  | 54958  | 49.713  | 34.414   |
| Total |           | 10882826 | 159698 | 100.000 | 100.000  |

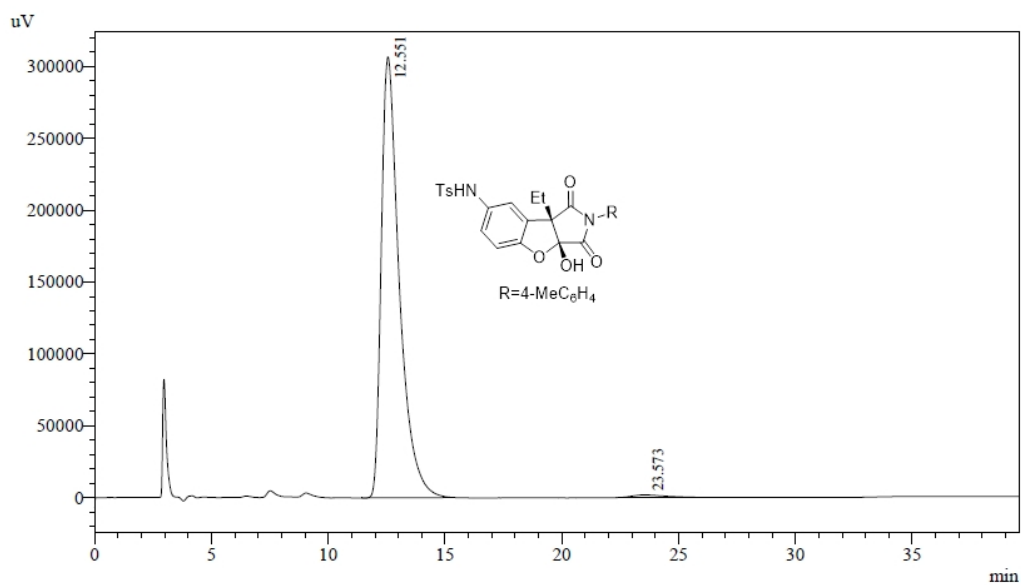

1 Det.A Ch1 / 254nm

Detector A Ch1 254nm

| Peak# | Ret. Time | Area     | Height | Area %  | Height % |
|-------|-----------|----------|--------|---------|----------|
| 1     | 12.551    | 16474888 | 306753 | 99.020  | 99.425   |
| 2     | 23.573    | 163115   | 1774   | 0.980   | 0.575    |
| Total |           | 16638004 | 308528 | 100.000 | 100.000  |

***N*-((3*aR*,8*bS*)-8*b*-ethyl-2-(4-ethylphenyl)-3*a*-hydroxy-1,3-dioxo-2,3,3*a*,8*b*-tetrahydro-1*H*-benzofuro[2,3-*c*]pyrrol-7-yl)-4-methylbenzenesulfonamide (3*da*):**

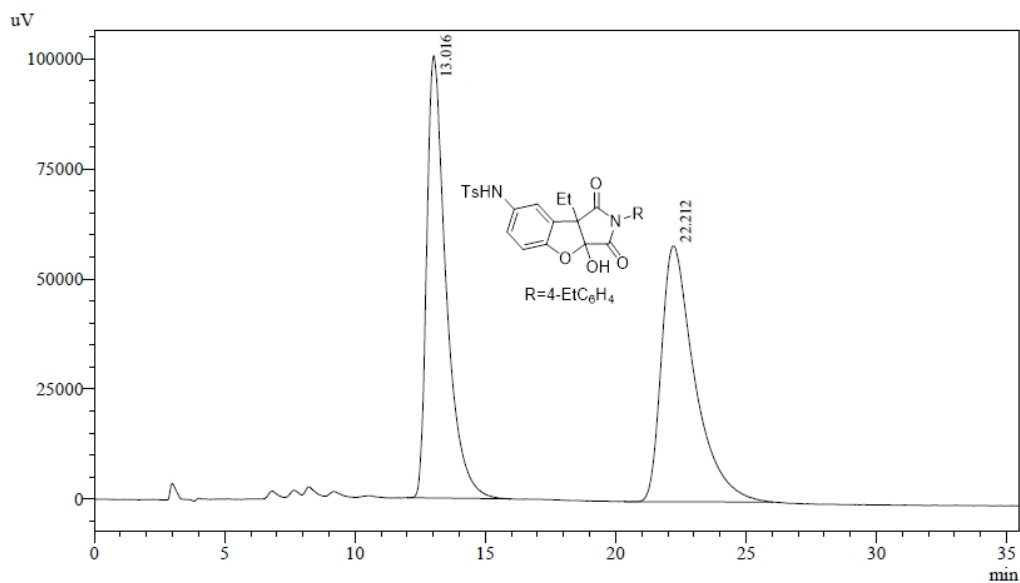

1 Det.A Ch1 / 254nm

Detector A Ch1 254nm

| Peak# | Ret. Time | Area     | Height | Area %  | Height % |
|-------|-----------|----------|--------|---------|----------|
| 1     | 13.016    | 5205267  | 100479 | 50.225  | 63.350   |
| 2     | 22.212    | 5158710  | 58131  | 49.775  | 36.650   |
| Total |           | 10363977 | 158610 | 100.000 | 100.000  |

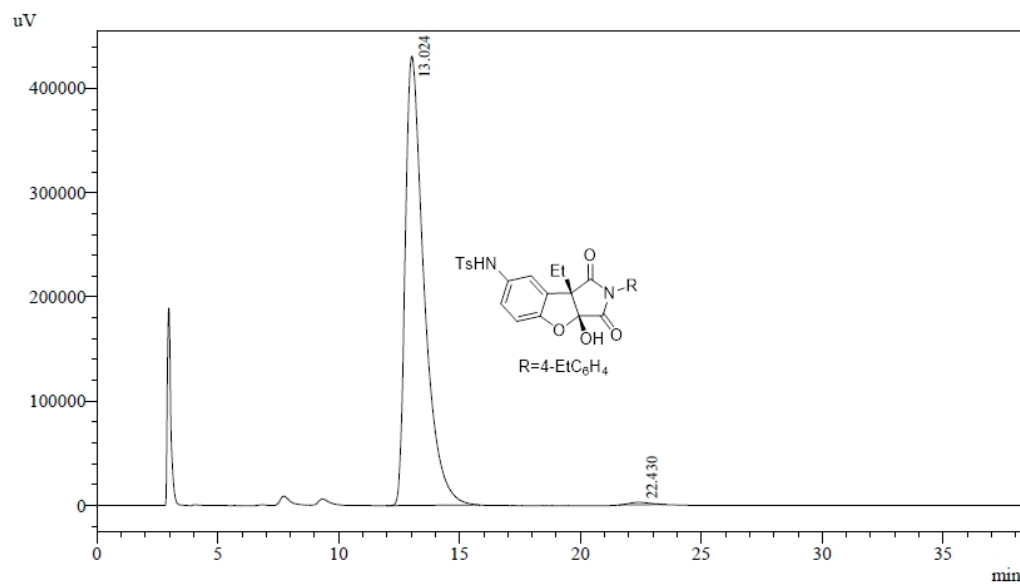

1 Det.A Ch1 / 254nm

Detector A Ch1 254nm

| Peak# | Ret. Time | Area     | Height | Area %  | Height % |
|-------|-----------|----------|--------|---------|----------|
| 1     | 13.024    | 23325723 | 430771 | 99.403  | 99.480   |
| 2     | 22.430    | 140177   | 2251   | 0.597   | 0.520    |
| Total |           | 23465900 | 433022 | 100.000 | 100.000  |

***N*-((3*aR*,8*bS*)-8*b*-ethyl-3*a*-hydroxy-2-(4-isopropylphenyl)-1,3-dioxo-2,3,3*a*,8*b*-tetrahydro-1*H*-benzofuro[2,3-*c*]pyrrol-7-yl)-4-methylbenzenesulfonamide (3ea):**

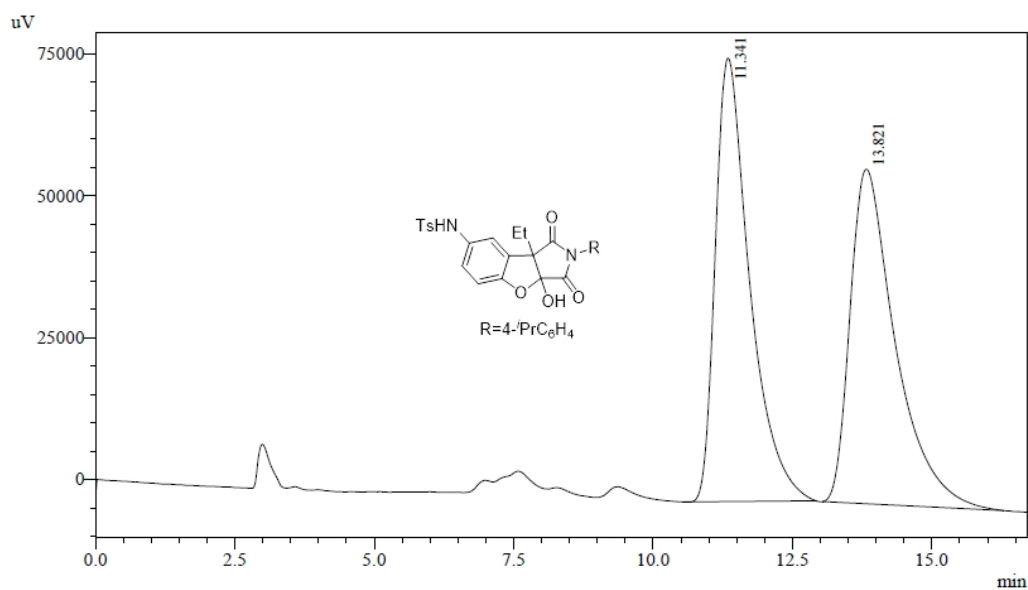

1 Det.A Ch1 / 254nm

Detector A Ch1 254nm

| Peak# | Ret. Time | Area    | Height | Area %  | Height % |
|-------|-----------|---------|--------|---------|----------|
| 1     | 11.341    | 3358676 | 78171  | 50.234  | 56.998   |
| 2     | 13.821    | 3327377 | 58976  | 49.766  | 43.002   |
| Total |           | 6686053 | 137147 | 100.000 | 100.000  |

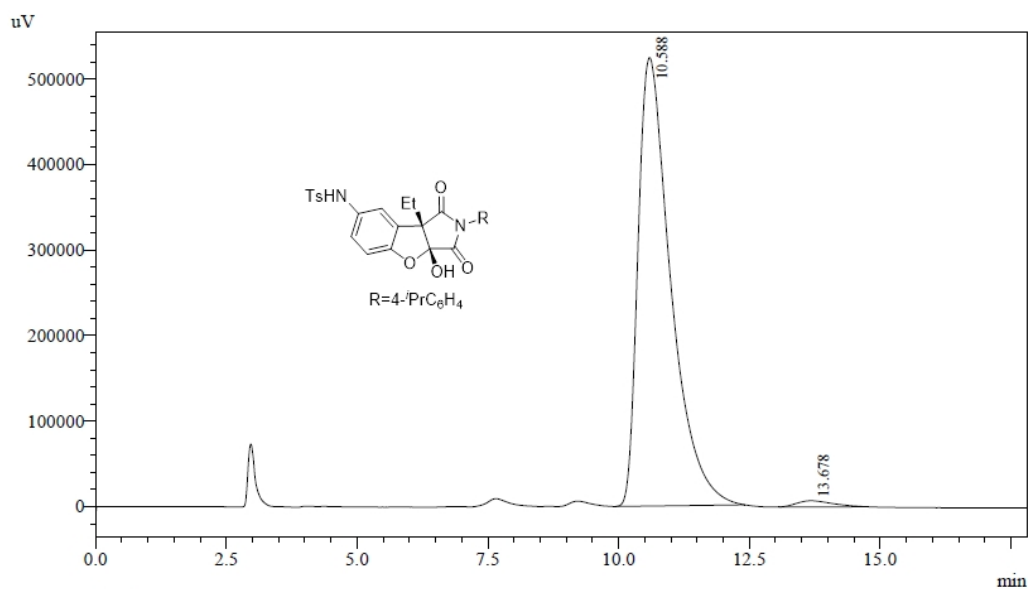

1 Det.A Ch1 / 254nm

Detector A Ch1 254nm

| Peak# | Ret. Time | Area     | Height | Area %  | Height % |
|-------|-----------|----------|--------|---------|----------|
| 1     | 10.588    | 22821991 | 524484 | 98.543  | 98.655   |
| 2     | 13.678    | 337386   | 7150   | 1.457   | 1.345    |
| Total |           | 23159377 | 531634 | 100.000 | 100.000  |

***N*-((3*aR*,8*bS*)-8*b*-ethyl-3*a*-hydroxy-1,3-dioxo-2-(4-phenoxyphenyl)-2,3,3*a*,8*b*-tetrahydro-1*H*-benzofuro[2,3-*c*]pyrrol-7-yl)-4-methylbenzenesulfonamide (3fa):**

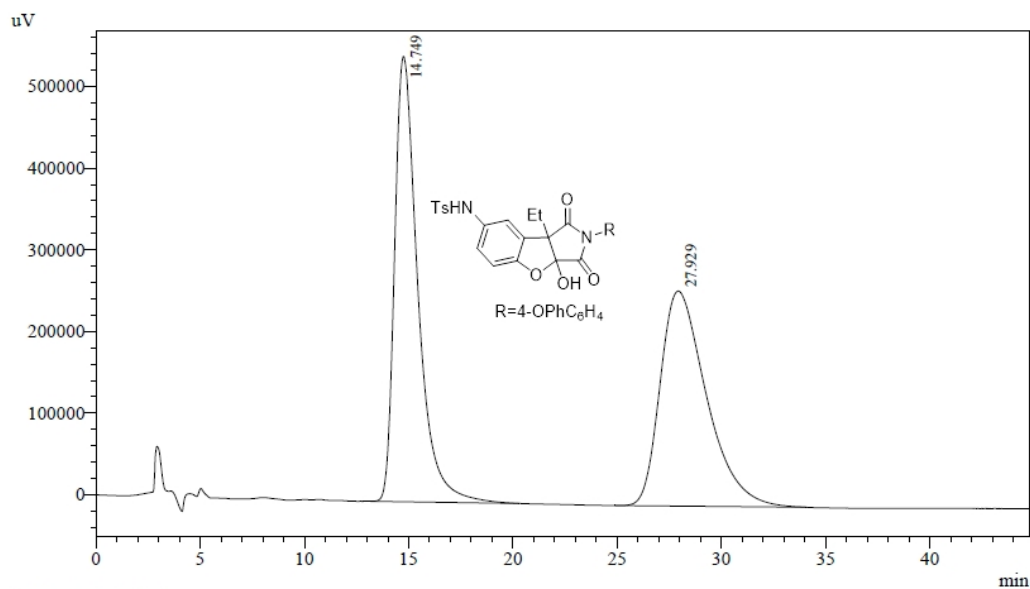

1 Det.A Ch1 / 254nm

Detector A Ch1 254nm

| Peak# | Ret. Time | Area     | Height | Area %  | Height % |
|-------|-----------|----------|--------|---------|----------|
| 1     | 14.749    | 42287369 | 545562 | 50.985  | 67.445   |
| 2     | 27.929    | 40653524 | 263339 | 49.015  | 32.555   |
| Total |           | 82940892 | 808901 | 100.000 | 100.000  |

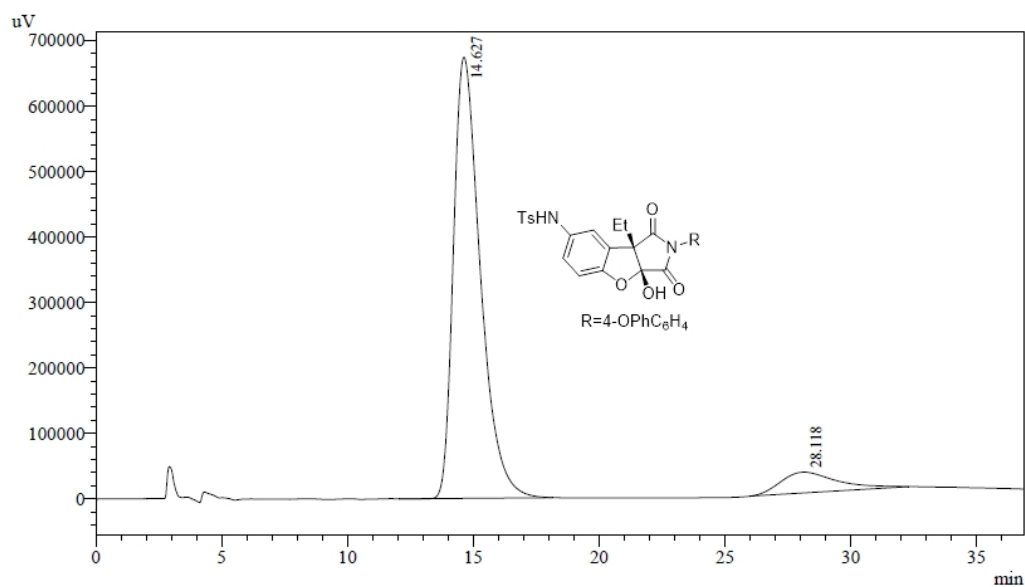

1 Det.A Ch1 / 254nm

Detector A Ch1 254nm

| Peak# | Ret. Time | Area     | Height | Area %  | Height % |
|-------|-----------|----------|--------|---------|----------|
| 1     | 14.627    | 50093282 | 674161 | 91.006  | 95.500   |
| 2     | 28.118    | 4950775  | 31766  | 8.994   | 4.500    |
| Total |           | 55044057 | 705927 | 100.000 | 100.000  |

***N*-((3*aR*,8*bS*)-8*b*-ethyl-2-(4-fluorophenyl)-3*a*-hydroxy-1,3-dioxo-2,3,3*a*,8*b*-tetrahydro-1*H*-benzofuro[2,3-*c*]pyrrol-7-yl)-4-methylbenzenesulfonamide (3*ga*):**

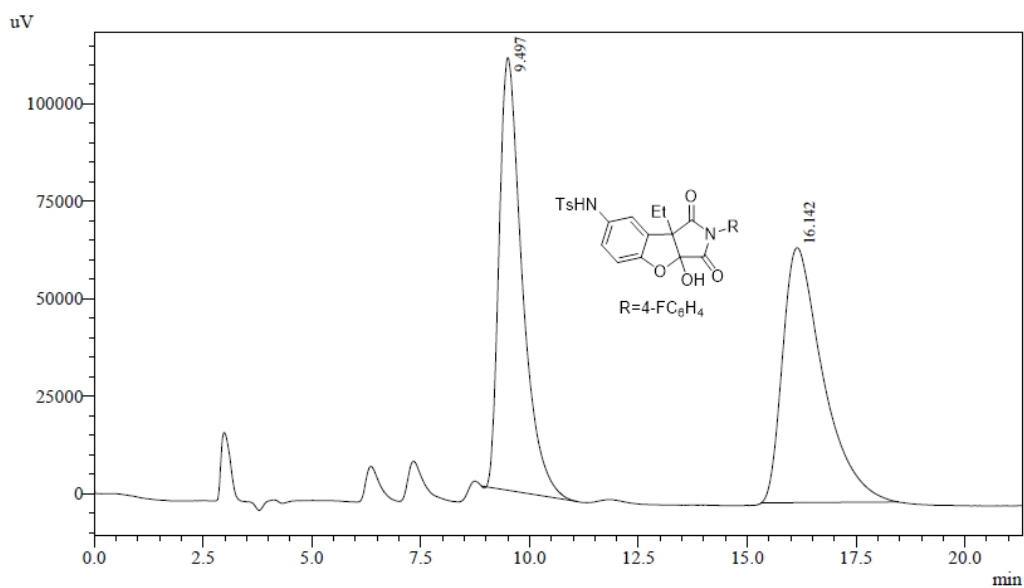

1 Det.A Ch1 / 254nm

Detector A Ch1 254nm

| Peak# | Ret. Time | Area    | Height | Area %  | Height % |
|-------|-----------|---------|--------|---------|----------|
| 1     | 9.497     | 4082998 | 111045 | 49.149  | 62.929   |
| 2     | 16.142    | 4224327 | 65415  | 50.851  | 37.071   |
| Total |           | 8307326 | 176460 | 100.000 | 100.000  |

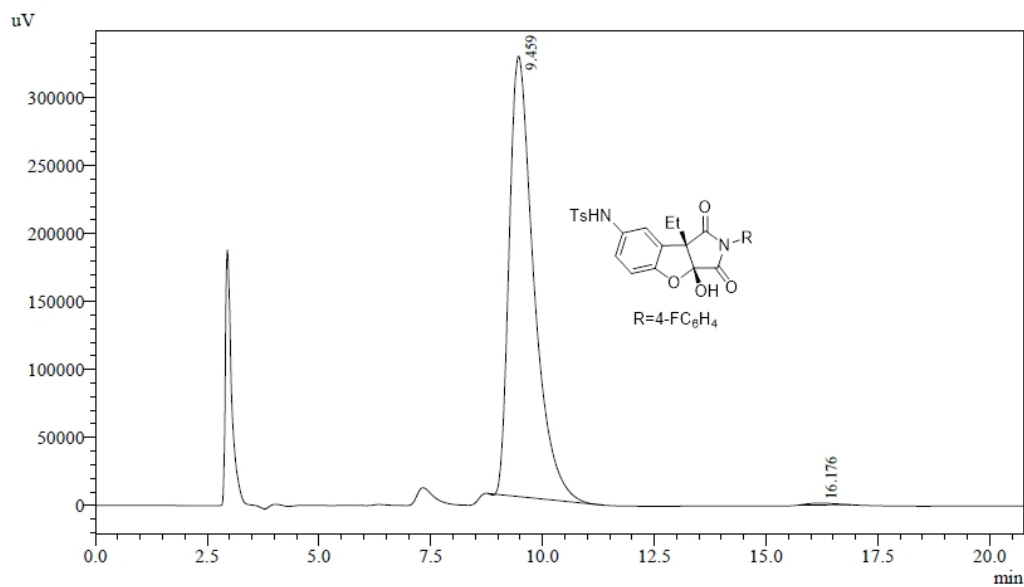

1 Det.A Ch1 / 254nm

Detector A Ch1 254nm

| Peak# | Ret. Time | Area     | Height | Area %  | Height % |
|-------|-----------|----------|--------|---------|----------|
| 1     | 9.459     | 12388197 | 323914 | 99.556  | 99.568   |
| 2     | 16.176    | 55287    | 1406   | 0.444   | 0.432    |
| Total |           | 12443485 | 325321 | 100.000 | 100.000  |

***N*-((3*aR*,8*bS*)-2-(4-chlorophenyl)-8*b*-ethyl-3*a*-hydroxy-1,3-dioxo-2,3,3*a*,8*b*-tetrahydro-1*H*-benzofuro[2,3-*c*]pyrrol-7-yl)-4-methylbenzenesulfonamide (3*ha*):**

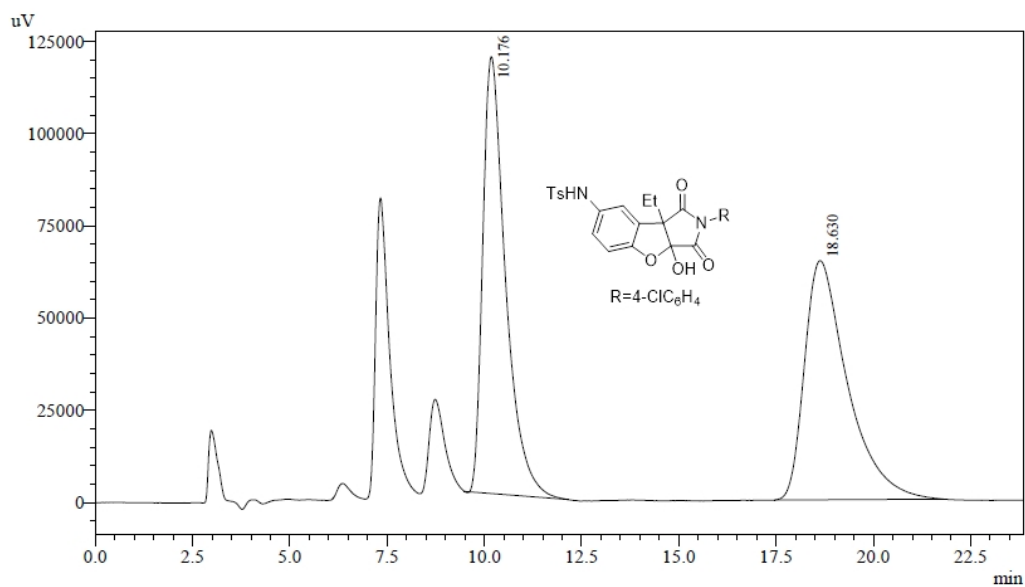

1 Det.A Ch1 / 254nm

Detector A Ch1 254nm

| Peak# | Ret. Time | Area    | Height | Area %  | Height % |
|-------|-----------|---------|--------|---------|----------|
| 1     | 10.176    | 4835088 | 118463 | 49.296  | 64.630   |
| 2     | 18.630    | 4973252 | 64831  | 50.704  | 35.370   |
| Total |           | 9808341 | 183294 | 100.000 | 100.000  |

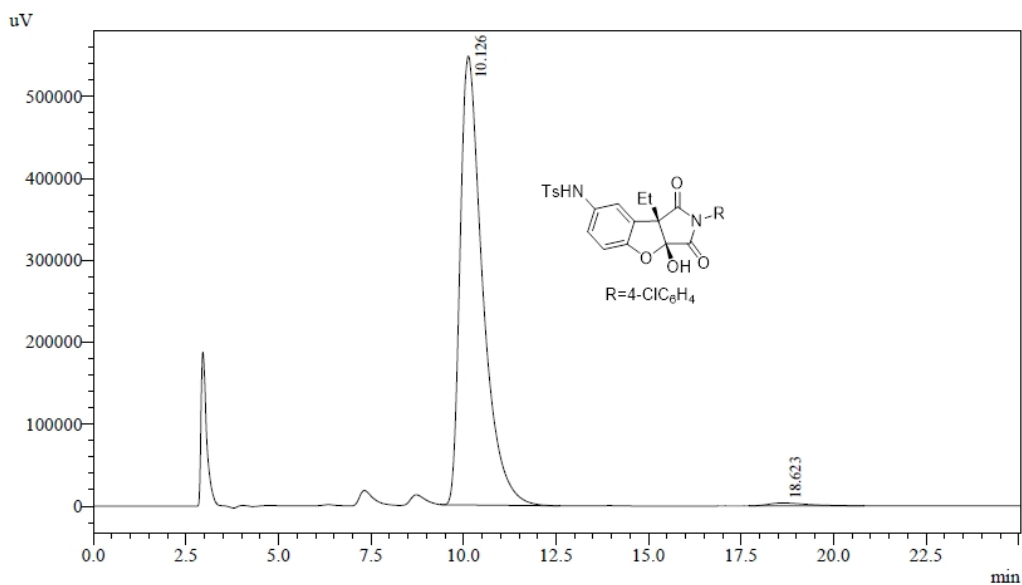

1 Det.A Ch1 / 254nm

Detector A Ch1 254nm

| Peak# | Ret. Time | Area     | Height | Area %  | Height % |
|-------|-----------|----------|--------|---------|----------|
| 1     | 10.126    | 23195153 | 547711 | 98.922  | 99.347   |
| 2     | 18.623    | 252803   | 3602   | 1.078   | 0.653    |
| Total |           | 23447956 | 551314 | 100.000 | 100.000  |

***N*-((3*aR*,8*bS*)-2-(4-bromophenyl)-8*b*-ethyl-3*a*-hydroxy-1,3-dioxo-2,3,3*a*,8*b*-tetrahydro-1*H*-benzofuro[2,3-*c*]pyrrol-7-yl)-4-methylbenzenesulfonamide (3ia):**

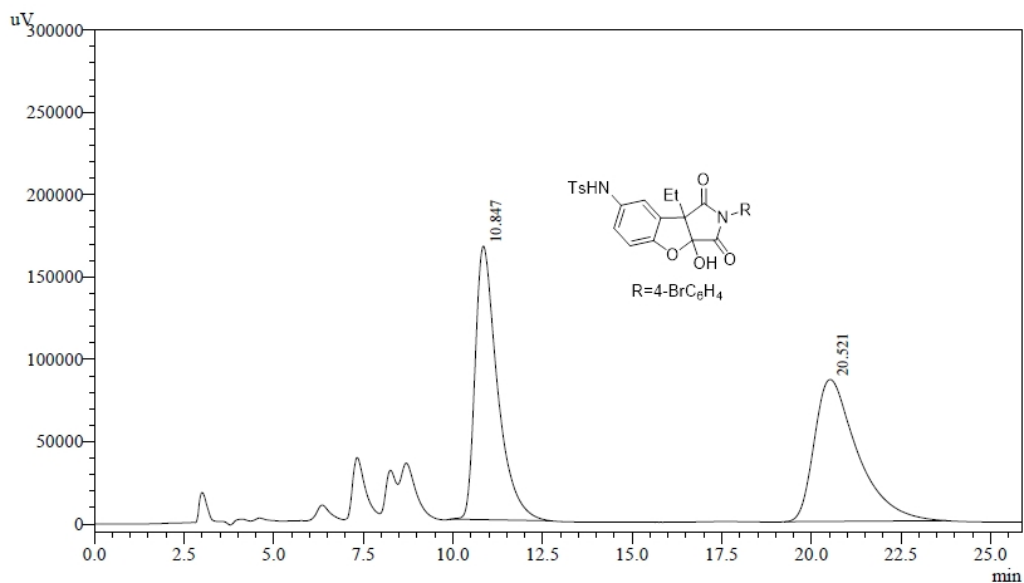

1 Det.A Ch1 / 254nm

Detector A Ch1 254nm

| Peak# | Ret. Time | Area     | Height | Area %  | Height % |
|-------|-----------|----------|--------|---------|----------|
| 1     | 10.847    | 7211399  | 166088 | 50.015  | 65.822   |
| 2     | 20.521    | 7207096  | 86240  | 49.985  | 34.178   |
| Total |           | 14418495 | 252328 | 100.000 | 100.000  |

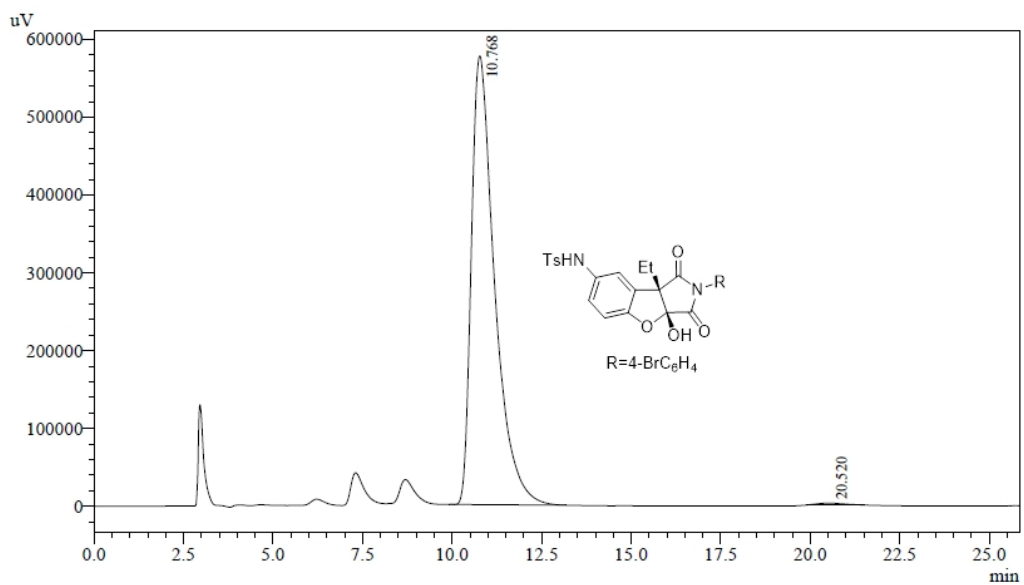

1 Det.A Ch1 / 254nm

Detector A Ch1 254nm

| Peak# | Ret. Time | Area     | Height | Area %  | Height % |
|-------|-----------|----------|--------|---------|----------|
| 1     | 10.768    | 26004929 | 576420 | 99.496  | 99.581   |
| 2     | 20.520    | 131608   | 2423   | 0.504   | 0.419    |
| Total |           | 26136537 | 578843 | 100.000 | 100.000  |



***N*-((3*aR*,8*bS*)-8*b*-ethyl-3*a*-hydroxy-2-(3-methoxyphenyl)-1,3-dioxo-2,3,3*a*,8*b*-tetrahydro-1*H*-benzofuro[2,3-*c*]pyrrol-7-yl)-4-methylbenzenesulfonamide (**3ja**):**

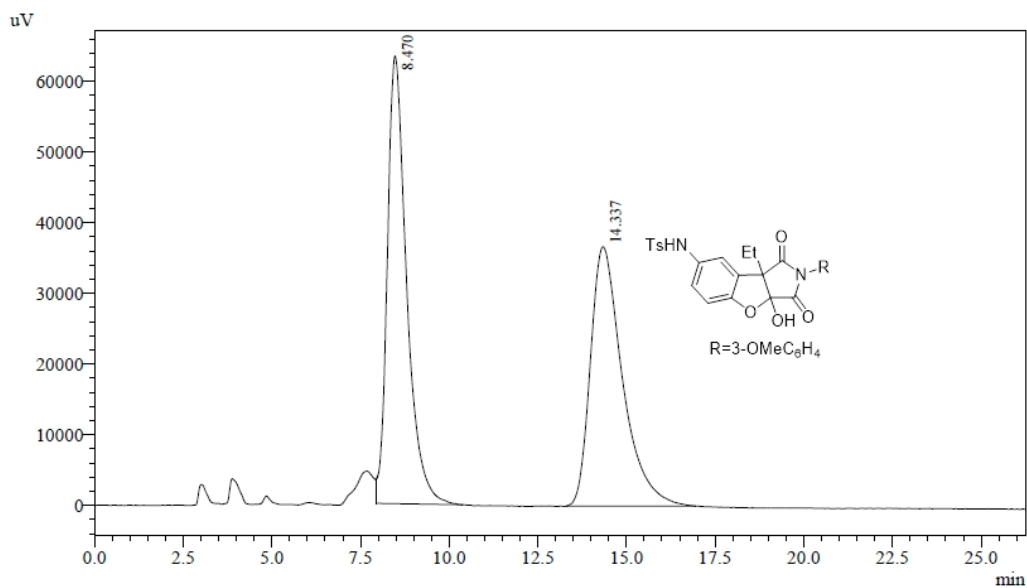

1 Det.A Ch1 / 254nm

Detector A Ch1 254nm

| Peak# | Ret. Time | Area    | Height | Area %  | Height % |
|-------|-----------|---------|--------|---------|----------|
| 1     | 8.470     | 2394469 | 63339  | 50.966  | 63.309   |
| 2     | 14.337    | 2303745 | 36708  | 49.034  | 36.691   |
| Total |           | 4698214 | 100047 | 100.000 | 100.000  |

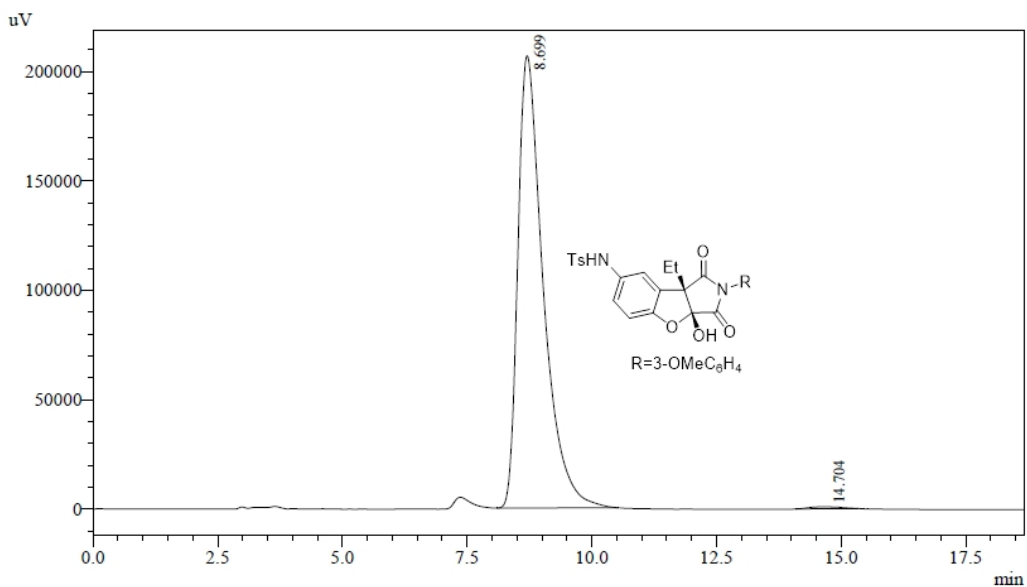

1 Det.A Ch1 / 254nm

Detector A Ch1 254nm

| Peak# | Ret. Time | Area    | Height | Area %  | Height % |
|-------|-----------|---------|--------|---------|----------|
| 1     | 8.699     | 7333965 | 206833 | 99.466  | 99.549   |
| 2     | 14.704    | 39389   | 938    | 0.534   | 0.451    |
| Total |           | 7373354 | 207771 | 100.000 | 100.000  |

***N*-((3*R*,8*bS*)-8*b*-ethyl-3*a*-hydroxy-1,3-dioxo-2-(*m*-tolyl)-2,3,3*a*,8*b*-tetrahydro-1*H*-benzofuro[2,3-*c*]pyrrol-7-yl)-4-methylbenzenesulfonamide (3*ka*):**

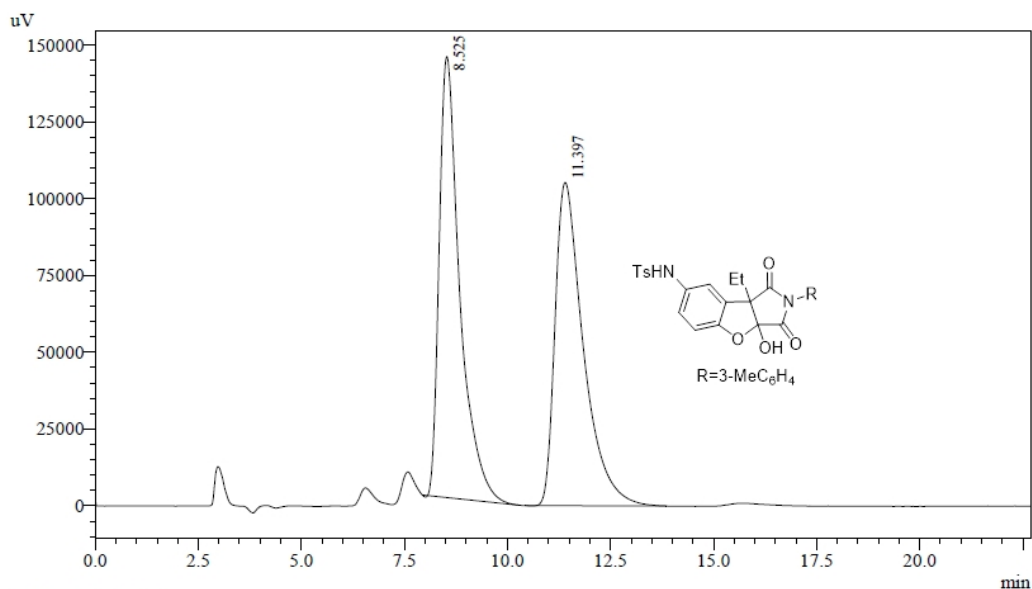

1 Det.A Ch1 / 254nm

Detector A Ch1 254nm

| Peak# | Ret. Time | Area     | Height | Area %  | Height % |
|-------|-----------|----------|--------|---------|----------|
| 1     | 8.525     | 4996195  | 143622 | 49.829  | 57.710   |
| 2     | 11.397    | 5030484  | 105248 | 50.171  | 42.290   |
| Total |           | 10026679 | 248870 | 100.000 | 100.000  |

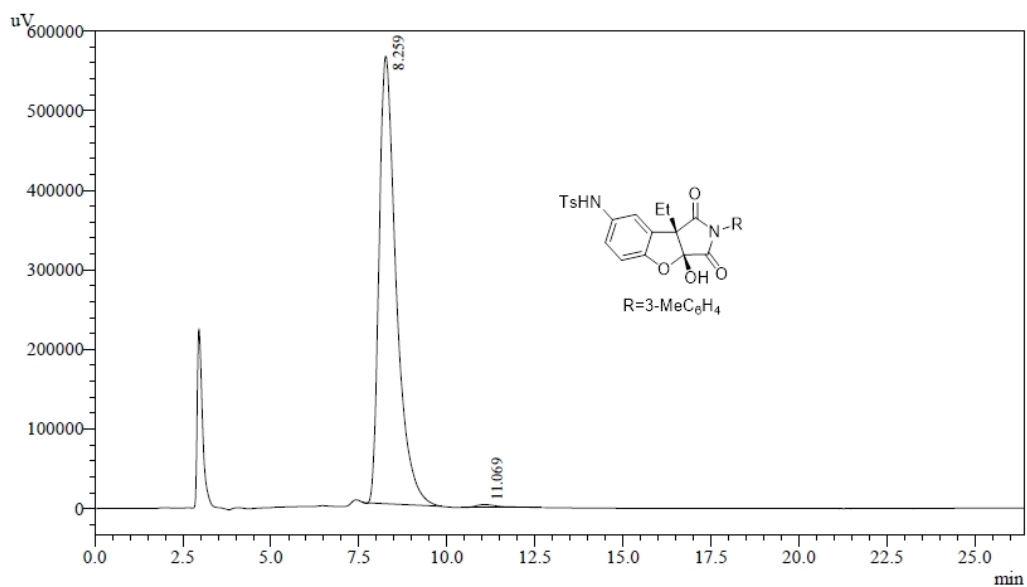

1 Det.A Ch1 / 254nm

Detector A Ch1 254nm

| Peak# | Ret. Time | Area     | Height | Area %  | Height % |
|-------|-----------|----------|--------|---------|----------|
| 1     | 8.259     | 19104328 | 562269 | 99.050  | 99.311   |
| 2     | 11.069    | 183223   | 3902   | 0.950   | 0.689    |
| Total |           | 19287550 | 566171 | 100.000 | 100.000  |

***N*-((3*aR*,8*bS*)-2-(3,5-dimethoxyphenyl)-8*b*-ethyl-3*a*-hydroxy-1,3-dioxo-2,3,3*a*,8*b*-tetrahydro-1*H*-benzofuro[2,3-*c*]pyrrol-7-yl)-4-methylbenzenesulfonamide (3*la*):**

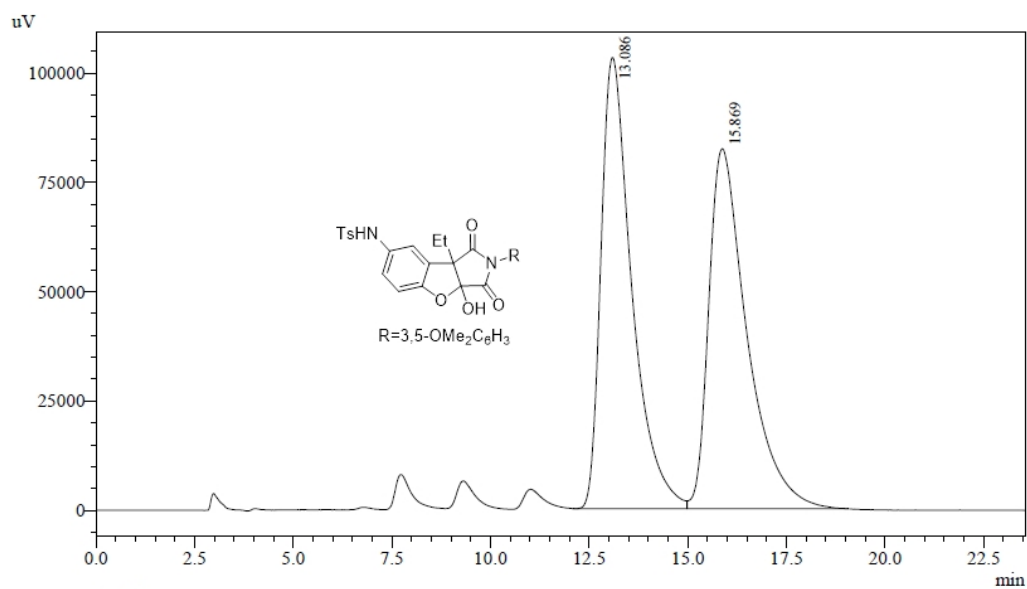

1 Det.A Ch1 / 254nm

Detector A Ch1 254nm

| Peak# | Ret. Time | Area     | Height | Area %  | Height % |
|-------|-----------|----------|--------|---------|----------|
| 1     | 13.086    | 5607679  | 103255 | 50.289  | 55.619   |
| 2     | 15.869    | 5543119  | 82393  | 49.711  | 44.381   |
| Total |           | 11150798 | 185648 | 100.000 | 100.000  |

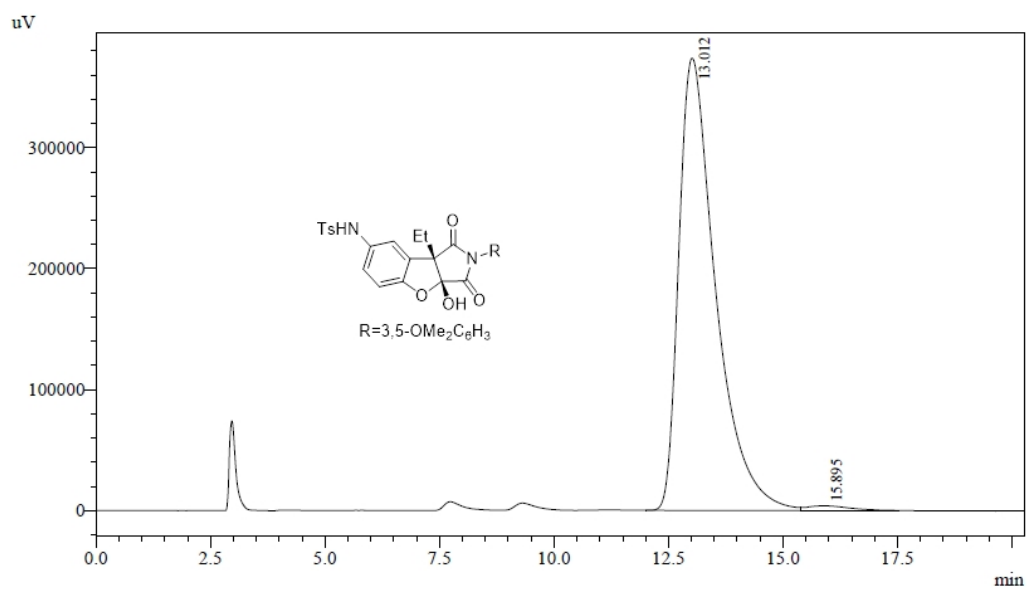

1 Det.A Ch1 / 254nm

Detector A Ch1 254nm

| Peak# | Ret. Time | Area     | Height | Area %  | Height % |
|-------|-----------|----------|--------|---------|----------|
| 1     | 13.012    | 20888720 | 373805 | 98.810  | 98.955   |
| 2     | 15.895    | 251617   | 3947   | 1.190   | 1.045    |
| Total |           | 21140337 | 377752 | 100.000 | 100.000  |

***N*-((3*aR*,8*bS*)-8*b*-ethyl-3*a*-hydroxy-2-(naphthalen-2-yl)-1,3-dioxo-2,3,3*a*,8*b*-tetrahydro-1*H*-benzofuro[2,3-*c*]pyrrol-7-yl)-4-methylbenzenesulfonamide (3*ma*):**

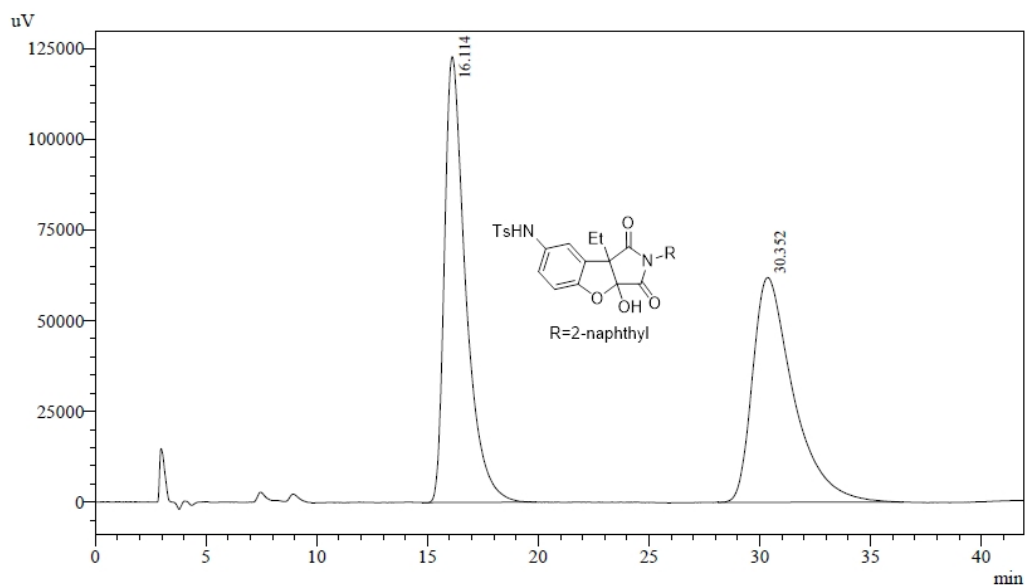

1 Det.A Ch1 / 254nm

Detector A Ch1 254nm

| Peak# | Ret. Time | Area     | Height | Area %  | Height % |
|-------|-----------|----------|--------|---------|----------|
| 1     | 16.114    | 8197404  | 122975 | 50.857  | 66.489   |
| 2     | 30.352    | 7920987  | 61981  | 49.143  | 33.511   |
| Total |           | 16118391 | 184956 | 100.000 | 100.000  |

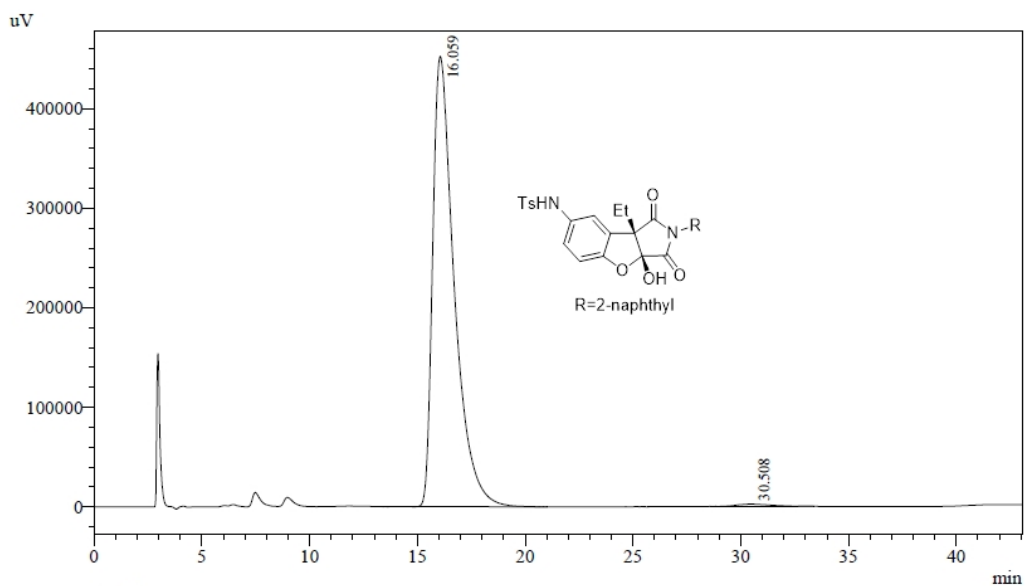

1 Det.A Ch1 / 254nm

Detector A Ch1 254nm

| Peak# | Ret. Time | Area     | Height | Area %  | Height % |
|-------|-----------|----------|--------|---------|----------|
| 1     | 16.059    | 31409945 | 452633 | 99.173  | 99.497   |
| 2     | 30.508    | 262048   | 2287   | 0.827   | 0.503    |
| Total |           | 31671993 | 454920 | 100.000 | 100.000  |

***N*-((3*aR*,8*bS*)-2-(benzo[*d*][1,3]dioxol-5-yl)-8*b*-ethyl-3*a*-hydroxy-1,3-dioxo-2,3,3*a*,8*b*-tetrahydro-1*H*-benzofuro[2,3-*c*]pyrrol-7-yl)-4-methylbenzenesulfonamide (3*na*):**

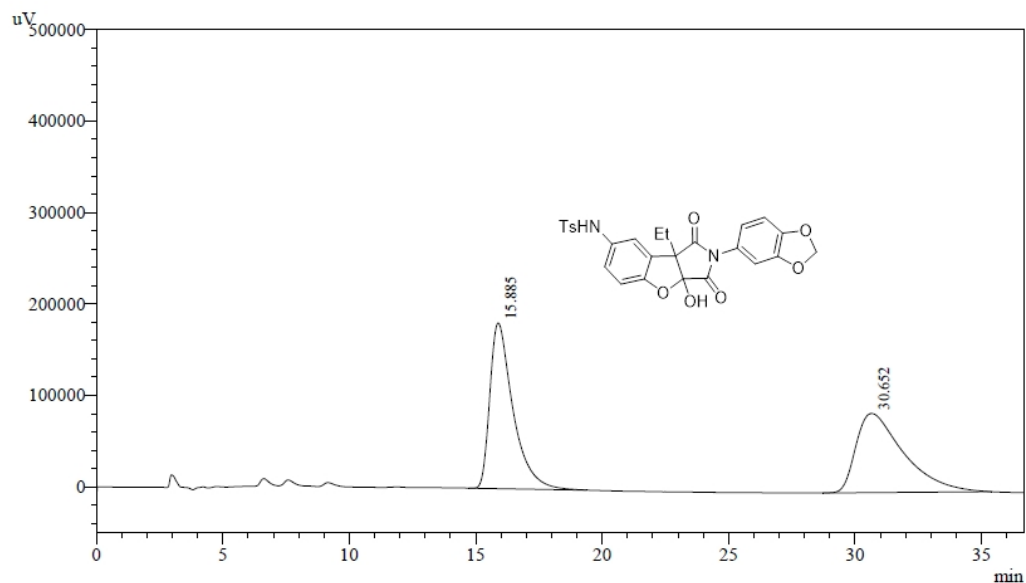

1 Det.A Ch1 / 254nm

Detector A Ch1 254nm

| Peak# | Ret. Time | Area     | Height | Area %  | Height % |
|-------|-----------|----------|--------|---------|----------|
| 1     | 15.885    | 11529711 | 181163 | 50.400  | 67.641   |
| 2     | 30.652    | 11346543 | 86666  | 49.600  | 32.359   |
| Total |           | 22876253 | 267829 | 100.000 | 100.000  |

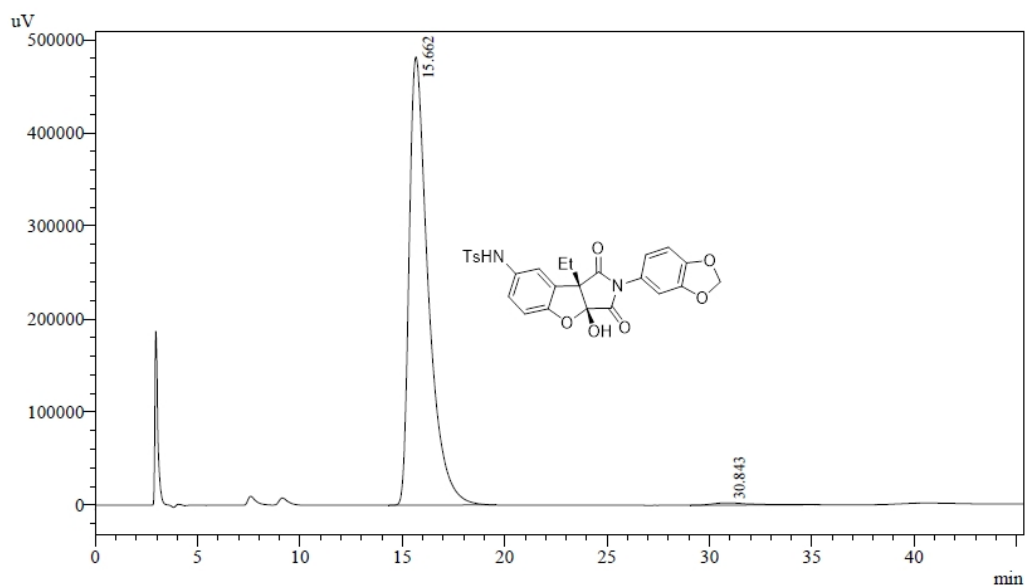

1 Det.A Ch1 / 254nm

Detector A Ch1 254nm

| Peak# | Ret. Time | Area     | Height | Area %  | Height % |
|-------|-----------|----------|--------|---------|----------|
| 1     | 15.662    | 31269293 | 481786 | 99.032  | 99.502   |
| 2     | 30.843    | 305790   | 2412   | 0.968   | 0.498    |
| Total |           | 31575083 | 484198 | 100.000 | 100.000  |

***N*-((3*aR*,8*bS*)-2-benzyl-8*b*-ethyl-3*a*-hydroxy-1,3-dioxo-2,3,3*a*,8*b*-tetrahydro-1*H*-benzofuro[2,3-*c*]pyrrol-7-yl)-4-methylbenzenesulfonamide (3*oa*):**

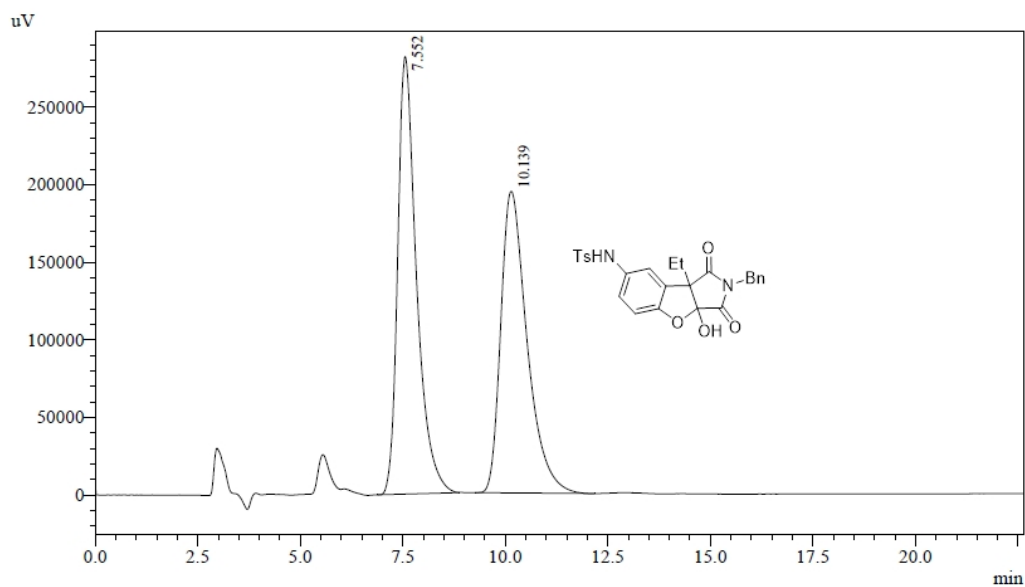

Detector A Ch1 254nm

| Peak# | Ret. Time | Area     | Height | Area %  | Height % |
|-------|-----------|----------|--------|---------|----------|
| 1     | 7.552     | 9007245  | 281983 | 50.979  | 59.185   |
| 2     | 10.139    | 8661374  | 194458 | 49.021  | 40.815   |
| Total |           | 17668619 | 476441 | 100.000 | 100.000  |

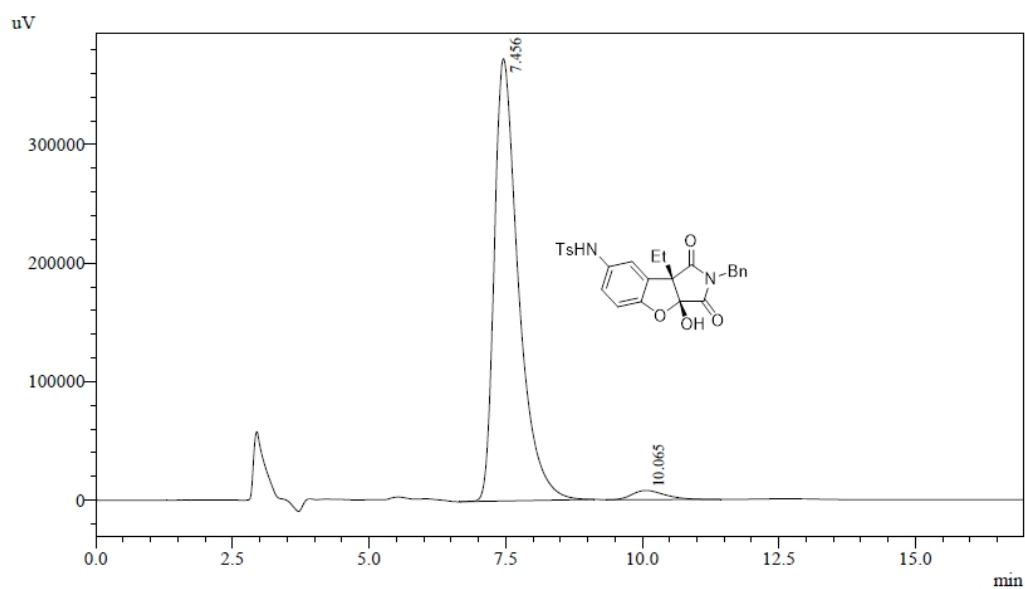

Detector A Ch1 254nm

| Peak# | Ret. Time | Area     | Height | Area %  | Height % |
|-------|-----------|----------|--------|---------|----------|
| 1     | 7.456     | 11505345 | 373125 | 97.302  | 97.980   |
| 2     | 10.065    | 319063   | 7692   | 2.698   | 2.020    |
| Total |           | 11824408 | 380817 | 100.000 | 100.000  |

***N*-((3*aR*,8*bS*)-8*b*-ethyl-3*a*-hydroxy-1,3-dioxo-2,3,3*a*,8*b*-tetrahydro-1*H*-benzofuro[2,3-*c*]pyrrol-7-yl)-4-methyl benzenesulfonamide (3*pa*):**

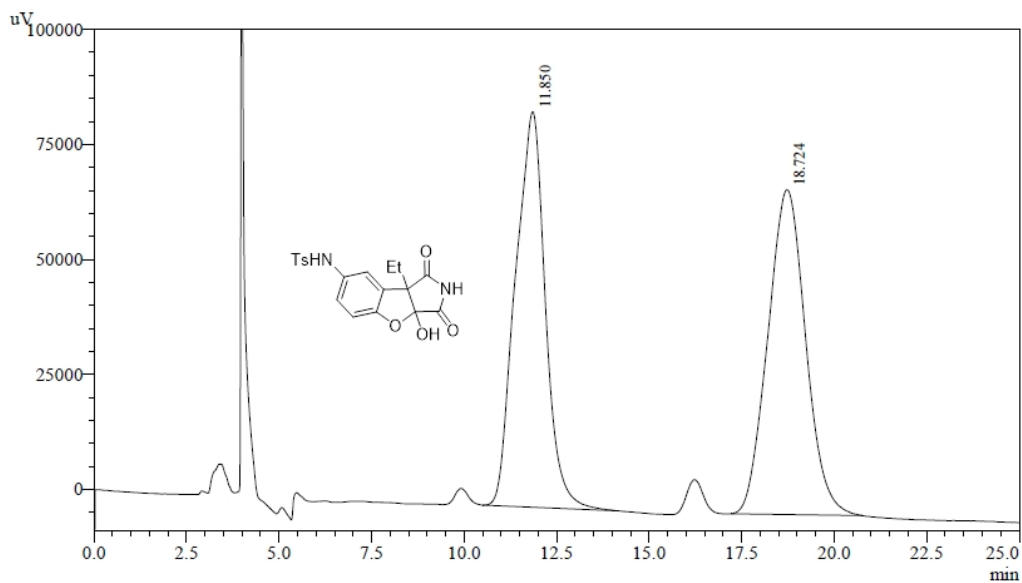

1 Det.A Ch1 / 254nm

Detector A Ch1 254nm

| Peak# | Ret. Time | Area    | Height | Area %  | Height % |
|-------|-----------|---------|--------|---------|----------|
| 1     | 11.850    | 4826245 | 85942  | 49.028  | 54.891   |
| 2     | 18.724    | 5017587 | 70627  | 50.972  | 45.109   |
| Total |           | 9843831 | 156569 | 100.000 | 100.000  |

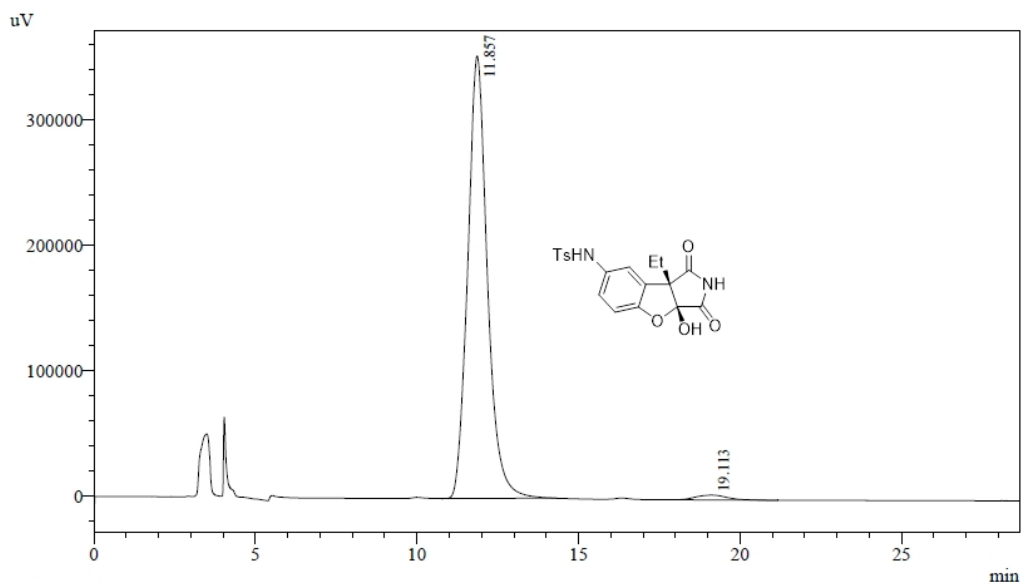

1 Det.A Ch1 / 254nm

Detector A Ch1 254nm

| Peak# | Ret. Time | Area     | Height | Area %  | Height % |
|-------|-----------|----------|--------|---------|----------|
| 1     | 11.857    | 14924509 | 352456 | 98.279  | 98.911   |
| 2     | 19.113    | 261291   | 3882   | 1.721   | 1.089    |
| Total |           | 15185800 | 356337 | 100.000 | 100.000  |

***N*-((3*aR*,8*bS*)-3*a*-hydroxy-2-(4-methoxyphenyl)-8*b*-methyl-1,3-dioxo-2,3,3*a*,8*b*-tetrahydro-1*H*-benzo-furo[2,3-*c*]pyrrol-7-yl)-4-methylbenzenesulfonamide (3*q*<sub>a</sub>):**

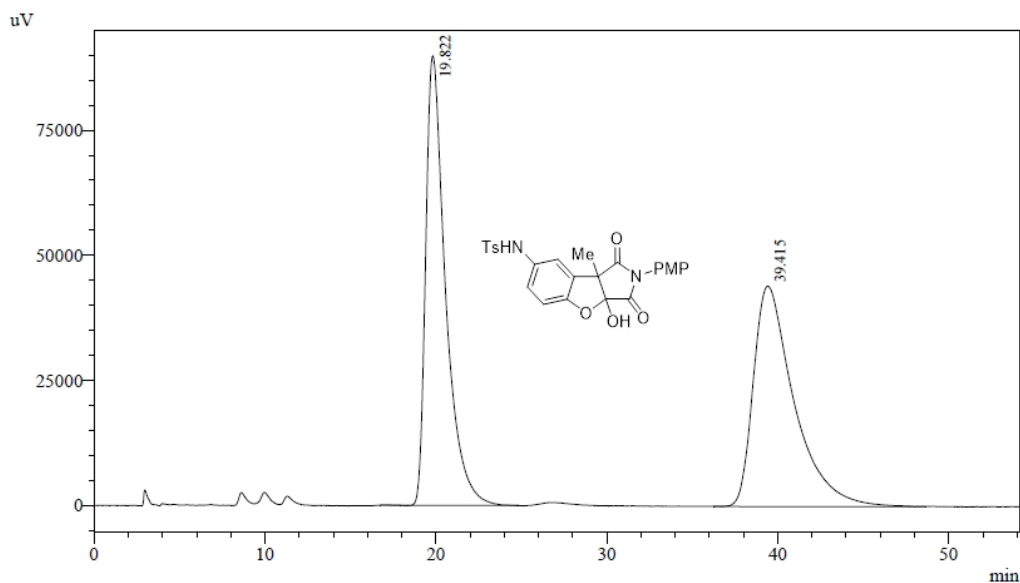

1 Det.A Ch1 / 254nm

Detector A Ch1 254nm

| Peak# | Ret. Time | Area     | Height | Area %  | Height % |
|-------|-----------|----------|--------|---------|----------|
| 1     | 19.822    | 7233399  | 89835  | 49.885  | 67.102   |
| 2     | 39.415    | 7266783  | 44043  | 50.115  | 32.898   |
| Total |           | 14500181 | 133878 | 100.000 | 100.000  |

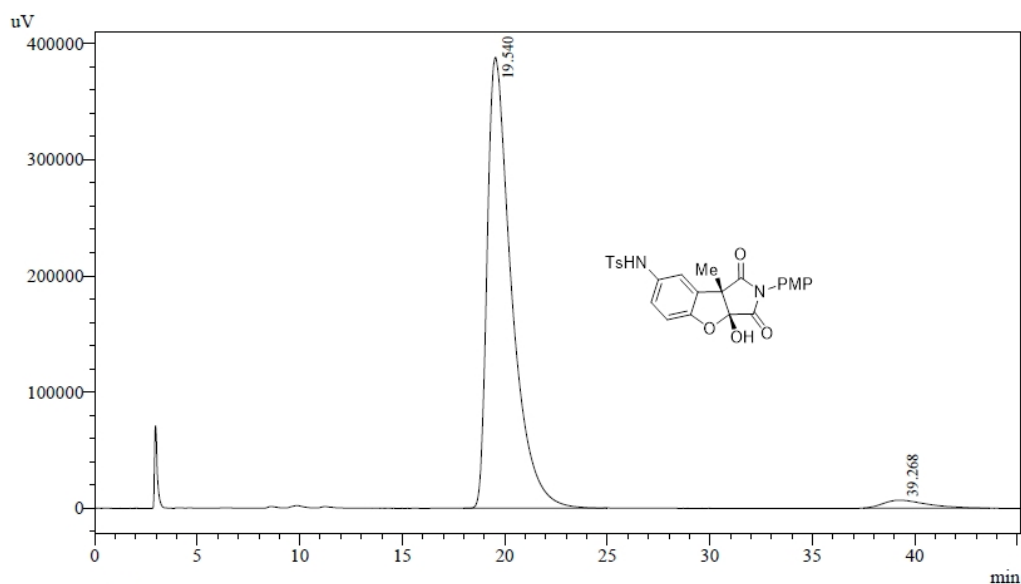

1 Det.A Ch1 / 254nm

Detector A Ch1 254nm

| Peak# | Ret. Time | Area     | Height | Area %  | Height % |
|-------|-----------|----------|--------|---------|----------|
| 1     | 19.540    | 32000779 | 388197 | 96.910  | 98.263   |
| 2     | 39.268    | 1020301  | 6864   | 3.090   | 1.737    |
| Total |           | 33021081 | 395061 | 100.000 | 100.000  |



***N*-((3*aR*,8*bS*)-3*a*-hydroxy-2-(4-methoxyphenyl)-1,3-dioxo-8*b*-propyl-2,3,3*a*,8*b*-tetrahydro-1*H*-benzofuro[2,3-*c*]pyrrol-7-yl)-4-methylbenzenesulfonamide (3*ra*):**

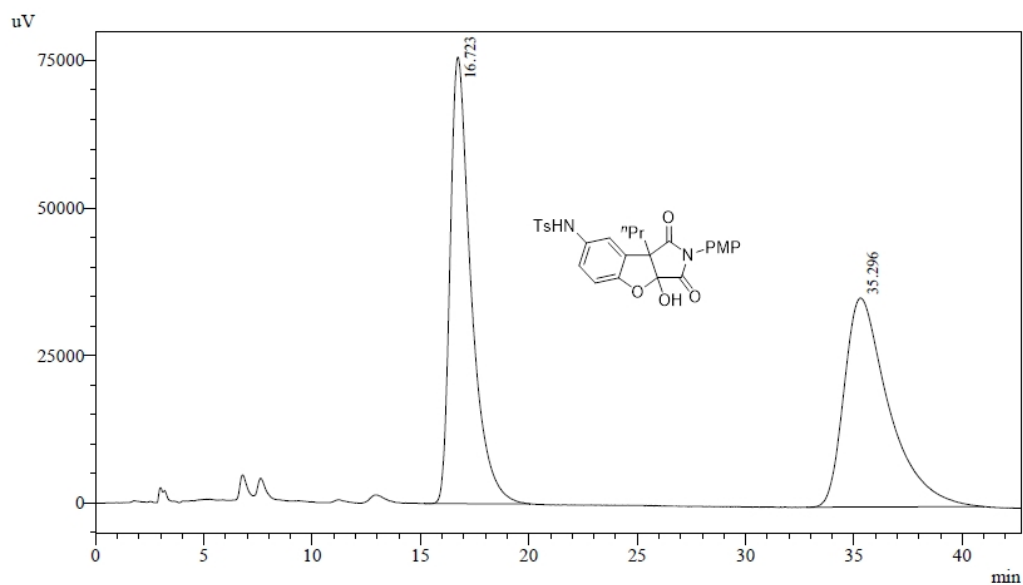

1 Det.A Ch1 / 254nm

Detector A Ch1 254nm

| Peak# | Ret. Time | Area     | Height | Area %  | Height % |
|-------|-----------|----------|--------|---------|----------|
| 1     | 16.723    | 5109388  | 75704  | 50.188  | 68.117   |
| 2     | 35.296    | 5071161  | 35435  | 49.812  | 31.883   |
| Total |           | 10180550 | 111139 | 100.000 | 100.000  |

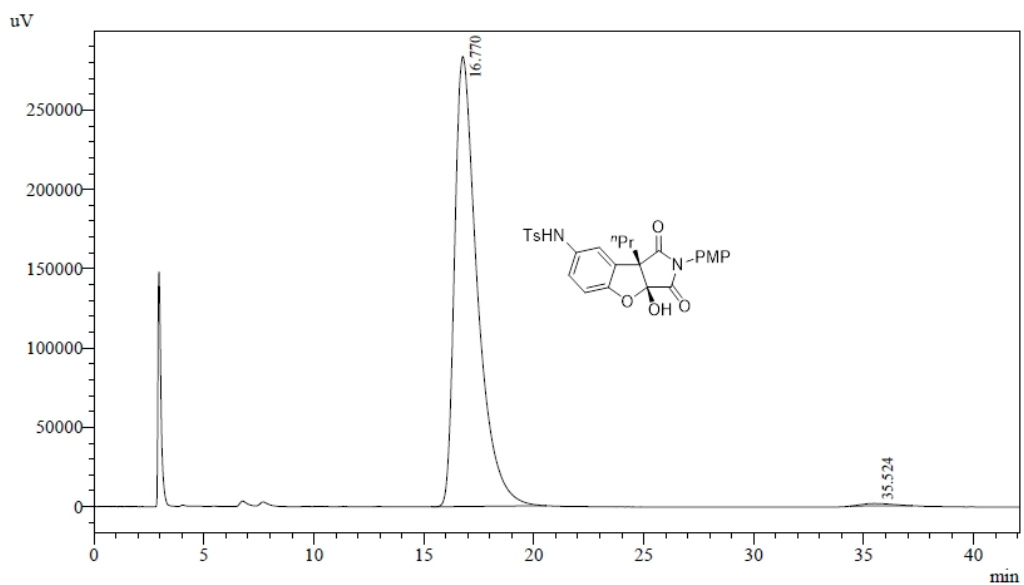

1 Det.A Ch1 / 254nm

Detector A Ch1 254nm

| Peak# | Ret. Time | Area     | Height | Area %  | Height % |
|-------|-----------|----------|--------|---------|----------|
| 1     | 16.770    | 20438946 | 283768 | 99.289  | 99.446   |
| 2     | 35.524    | 146441   | 1580   | 0.711   | 0.554    |
| Total |           | 20585387 | 285348 | 100.000 | 100.000  |

***N*-((3*aR*,8*bS*)-8*b*-benzyl-3*a*-hydroxy-2-(4-methoxyphenyl)-1,3-dioxo-2,3,3*a*,8*b*-tetrahydro-1*H*-benzofuro[2,3-*c*]pyrrol-7-yl)-4-methylbenzenesulfonamide (3*sa*):**

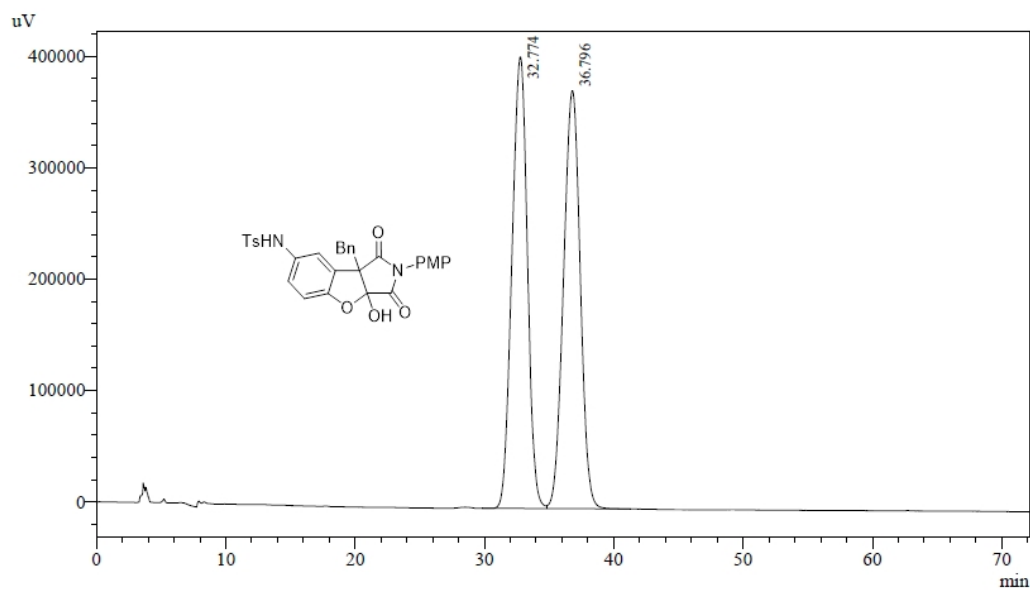

1 Det.A Ch1 / 254nm

Detector A Ch1 254nm

| Peak# | Ret. Time | Area     | Height | Area %  | Height % |
|-------|-----------|----------|--------|---------|----------|
| 1     | 32.774    | 33613328 | 405535 | 49.938  | 51.927   |
| 2     | 36.796    | 33696556 | 375431 | 50.062  | 48.073   |
| Total |           | 67309884 | 780965 | 100.000 | 100.000  |

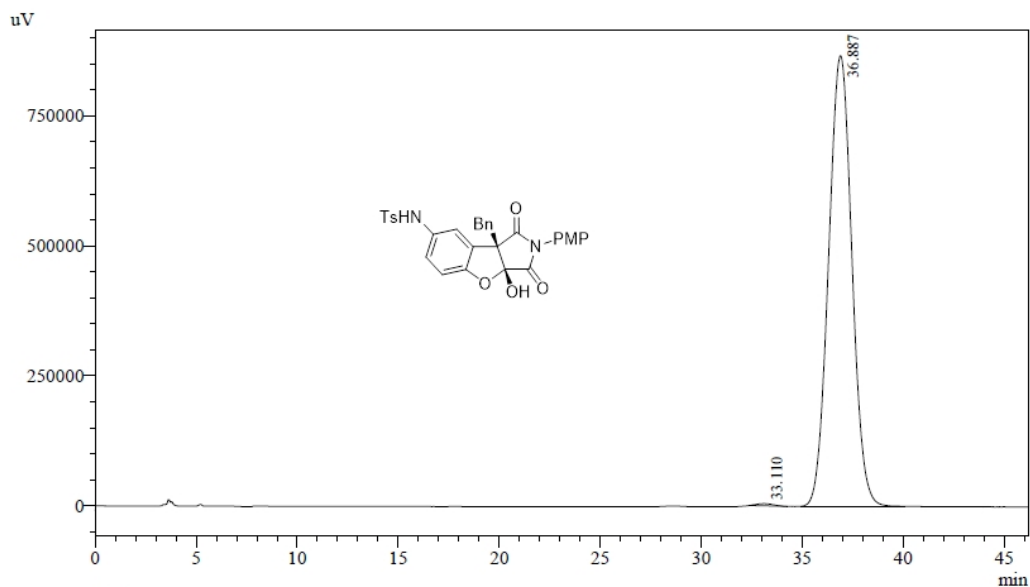

1 Det.A Ch1 / 254nm

Detector A Ch1 254nm

| Peak# | Ret. Time | Area     | Height | Area %  | Height % |
|-------|-----------|----------|--------|---------|----------|
| 1     | 33.110    | 242987   | 4266   | 0.349   | 0.490    |
| 2     | 36.887    | 69473179 | 866647 | 99.651  | 99.510   |
| Total |           | 69716166 | 870913 | 100.000 | 100.000  |

***N*-((3*aR*,8*bS*)-3*a*-hydroxy-2-(4-methoxyphenyl)-1,3-dioxo-8*b*-phenyl-2,3,3*a*,8*b*-tetrahydro-1*H*-benzofuro[2,3-*c*]pyrrol-7-yl)-4-methylbenzenesulfonamide (3*ta*)**

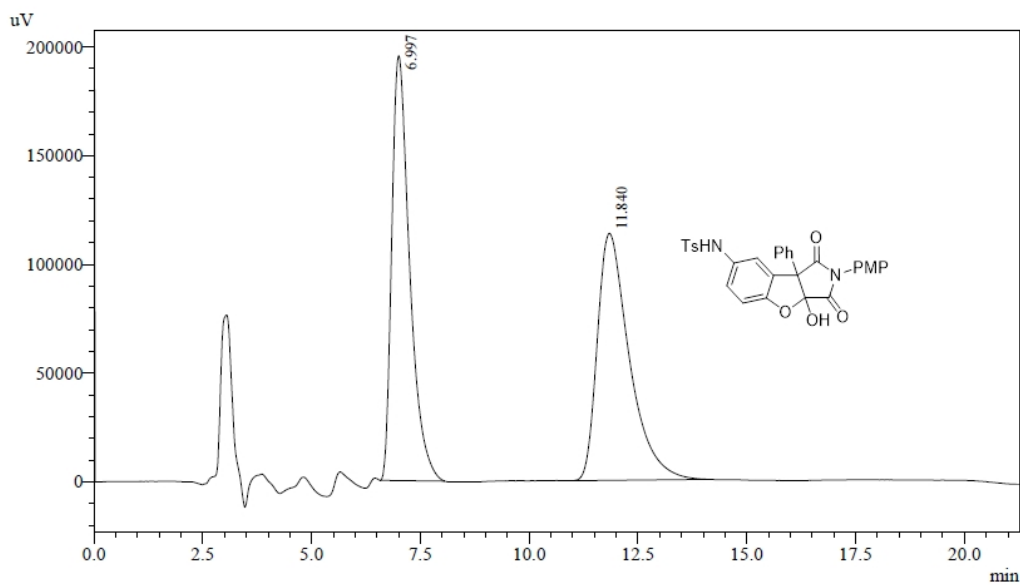

1 Det.A Ch1 / 254nm

Detector A Ch1 254nm

| Peak# | Ret. Time | Area     | Height | Area %  | Height % |
|-------|-----------|----------|--------|---------|----------|
| 1     | 6.997     | 5590467  | 195393 | 49.009  | 63.234   |
| 2     | 11.840    | 5816455  | 113606 | 50.991  | 36.766   |
| Total |           | 11406922 | 308999 | 100.000 | 100.000  |

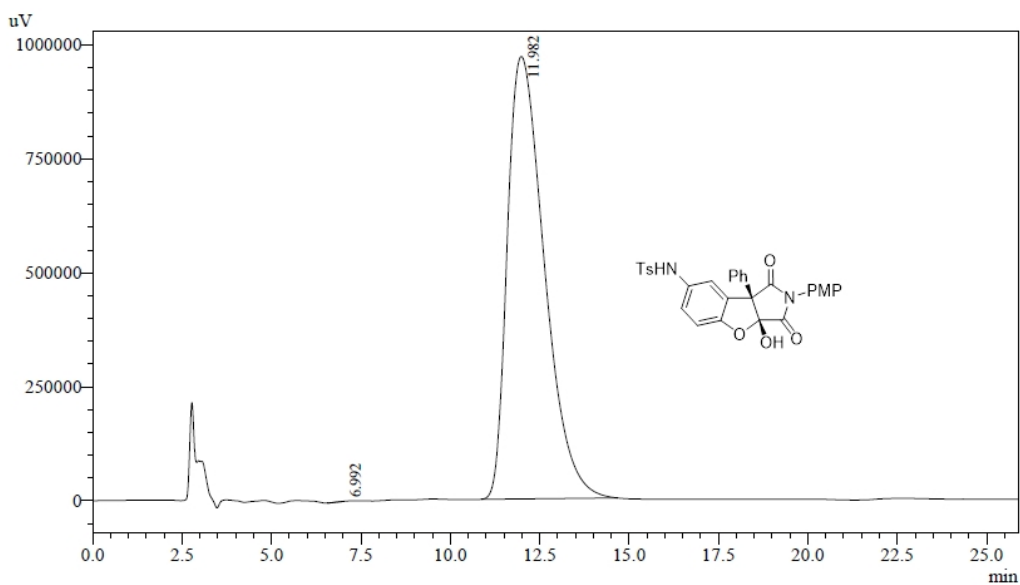

1 Det.A Ch1 / 254nm

Detector A Ch1 254nm

| Peak# | Ret. Time | Area     | Height | Area %  | Height % |
|-------|-----------|----------|--------|---------|----------|
| 1     | 6.992     | 81       | 6      | 0.000   | 0.001    |
| 2     | 11.982    | 69760807 | 970824 | 100.000 | 99.999   |
| Total |           | 69760888 | 970830 | 100.000 | 100.000  |

***N*-((3*aR*,8*bS*)-3*a*-hydroxy-2-(4-methoxyphenyl)-1,3-dioxo-8*b*-phenyl-2,3,3*a*,8*b*-tetrahydro-1*H*-benzofuro[2,3-*c*]pyrrol-7-yl)-4-methoxybenzenesulfonamide (3*ab*):**

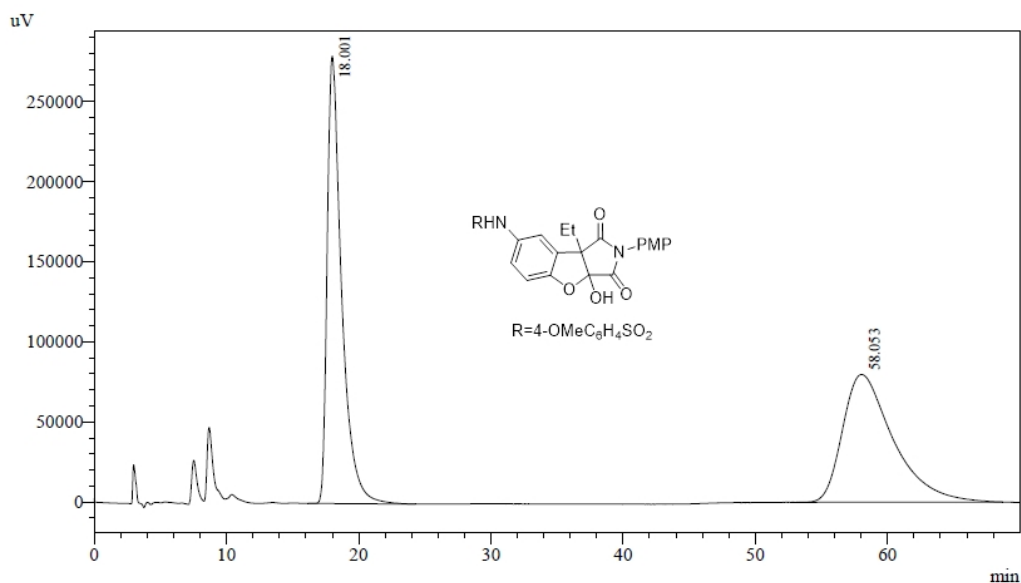

1 Det.A Ch1 / 254nm

Detector A Ch1 254nm

| Peak# | Ret. Time | Area     | Height | Area %  | Height % |
|-------|-----------|----------|--------|---------|----------|
| 1     | 18.001    | 21248703 | 279162 | 50.042  | 77.788   |
| 2     | 58.053    | 21212874 | 79715  | 49.958  | 22.212   |
| Total |           | 42461577 | 358876 | 100.000 | 100.000  |

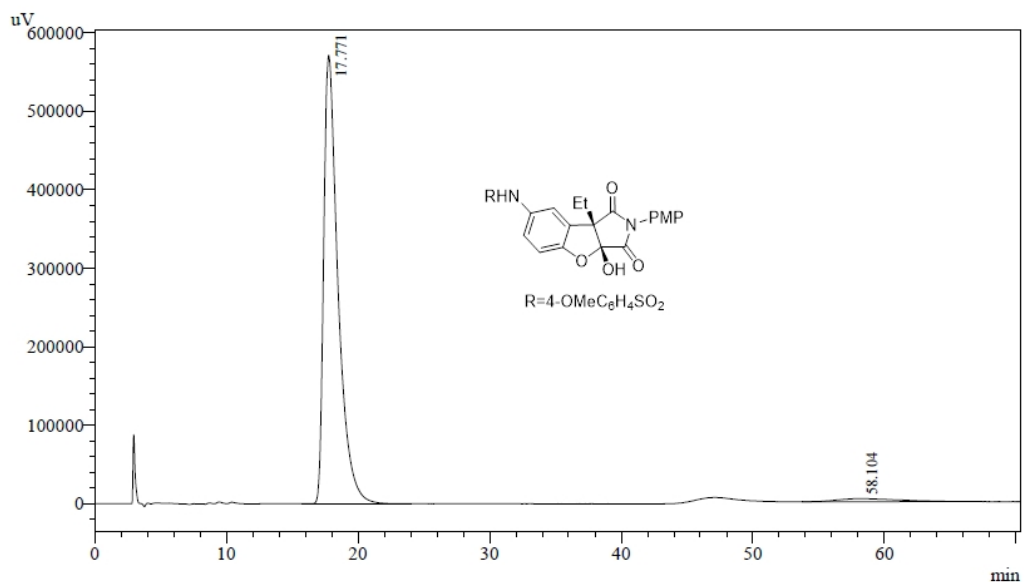

1 Det.A Ch1 / 254nm

Detector A Ch1 254nm

| Peak# | Ret. Time | Area     | Height | Area %  | Height % |
|-------|-----------|----------|--------|---------|----------|
| 1     | 17.771    | 43267634 | 571809 | 97.127  | 99.318   |
| 2     | 58.104    | 1279921  | 3929   | 2.873   | 0.682    |
| Total |           | 44547555 | 575737 | 100.000 | 100.000  |

***N*-((3*aR*,8*bS*)-3*a*-hydroxy-2-(4-methoxyphenyl)-1,3-dioxo-8*b*-phenyl-2,3,3*a*,8*b*-tetrahydro-1*H*-benzofuro[2,3-*c*]pyrrol-7-yl)-4-nitrobenzenesulfonamide (3*a*):**

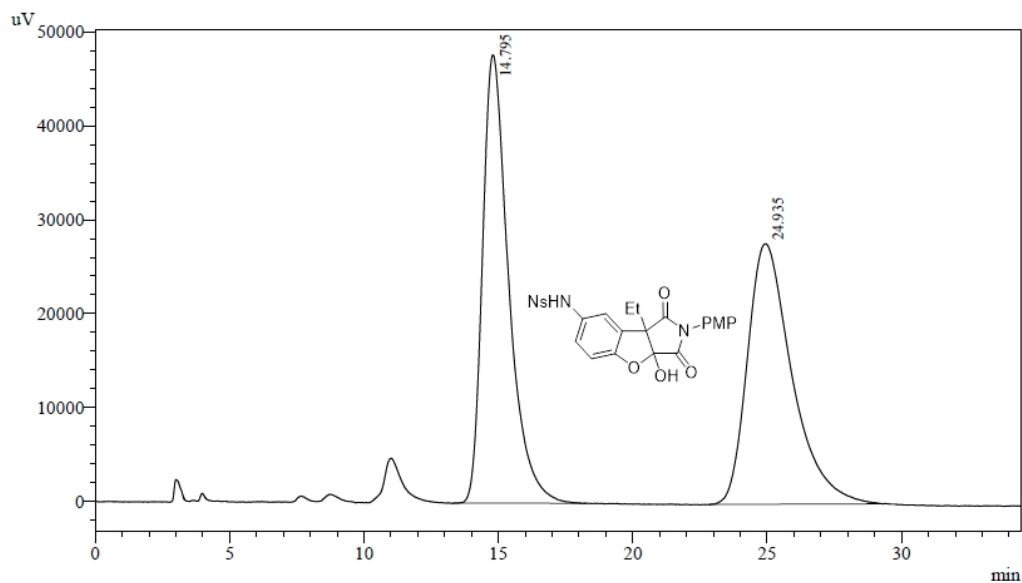

1 Det.A Ch1 / 254nm

Detector A Ch1 254nm

| Peak# | Ret. Time | Area    | Height | Area %  | Height % |
|-------|-----------|---------|--------|---------|----------|
| 1     | 14.795    | 3231184 | 47728  | 50.325  | 63.247   |
| 2     | 24.935    | 3189505 | 27735  | 49.675  | 36.753   |
| Total |           | 6420689 | 75463  | 100.000 | 100.000  |

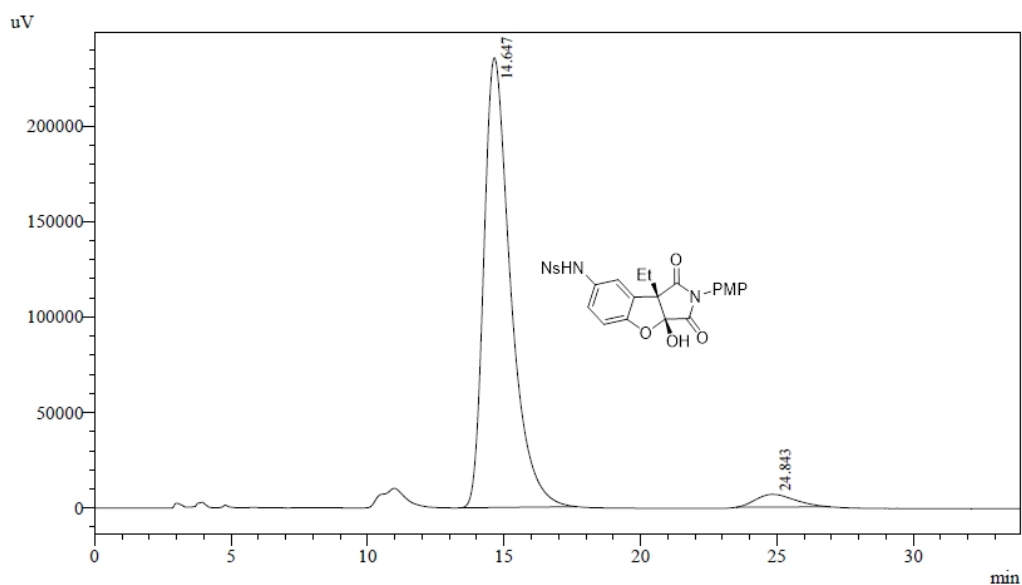

1 Det.A Ch1 / 254nm

Detector A Ch1 254nm

| Peak# | Ret. Time | Area     | Height | Area %  | Height % |
|-------|-----------|----------|--------|---------|----------|
| 1     | 14.647    | 16025063 | 235462 | 96.051  | 97.252   |
| 2     | 24.843    | 658929   | 6652   | 3.949   | 2.748    |
| Total |           | 16683992 | 242114 | 100.000 | 100.000  |

***N*-((3*aR*,8*bS*)-3*a*-hydroxy-2-(4-methoxyphenyl)-1,3-dioxo-8*b*-phenyl-2,3,3*a*,8*b*-tetrahydro-1*H*-benzofuro[2,3-*c*]pyrrol-7-yl)benzenesulfonamide (3*ad*):**

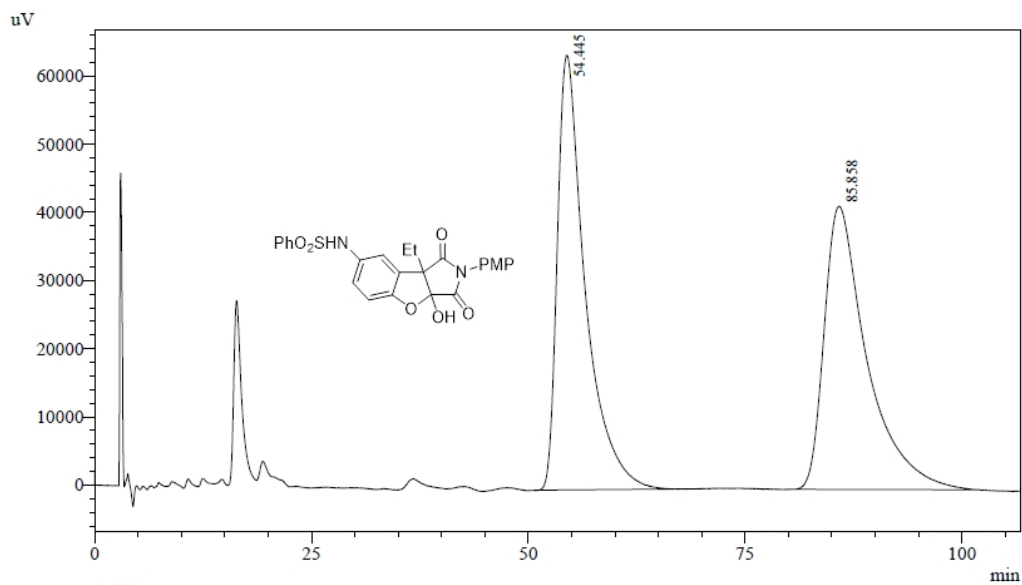

Detector A Ch1 254nm

| Peak# | Ret. Time | Area     | Height | Area %  | Height % |
|-------|-----------|----------|--------|---------|----------|
| 1     | 54.445    | 14237373 | 63748  | 50.063  | 60.546   |
| 2     | 85.858    | 14201410 | 41540  | 49.937  | 39.454   |
| Total |           | 28438783 | 105288 | 100.000 | 100.000  |

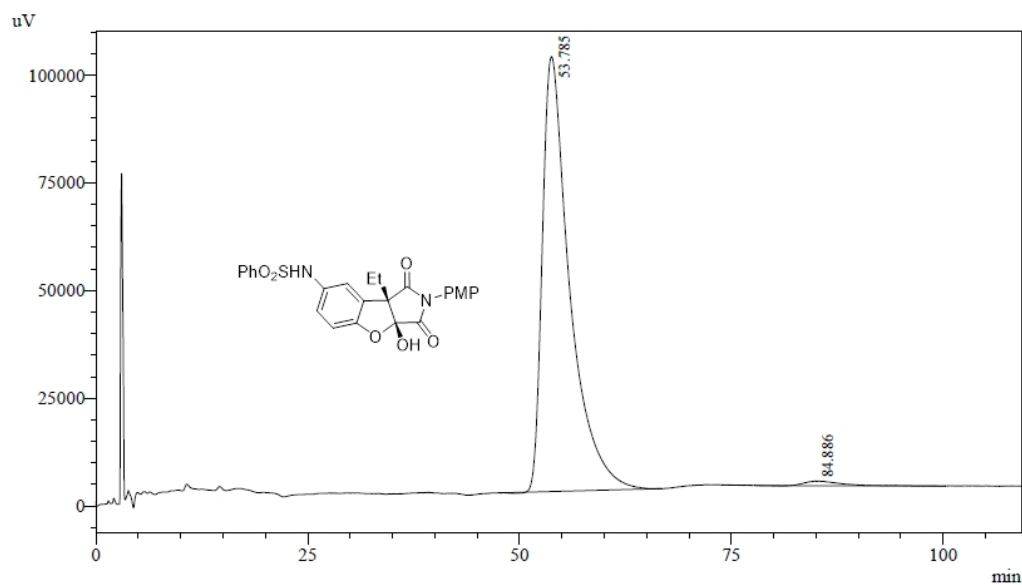

Detector A Ch1 254nm

| Peak# | Ret. Time | Area     | Height | Area %  | Height % |
|-------|-----------|----------|--------|---------|----------|
| 1     | 53.785    | 22675624 | 100984 | 98.788  | 98.960   |
| 2     | 84.886    | 278140   | 1062   | 1.212   | 1.040    |
| Total |           | 22953764 | 102046 | 100.000 | 100.000  |

***N*-((3*aR*,8*bS*)-3*a*-hydroxy-2-(4-methoxyphenyl)-1,3-dioxo-8*b*-phenyl-2,3,3*a*,8*b*-tetrahydro-1*H*-benzofuro[2,3-*c*]pyrrol-7-yl)methanesulfonamide (3*ae*):**

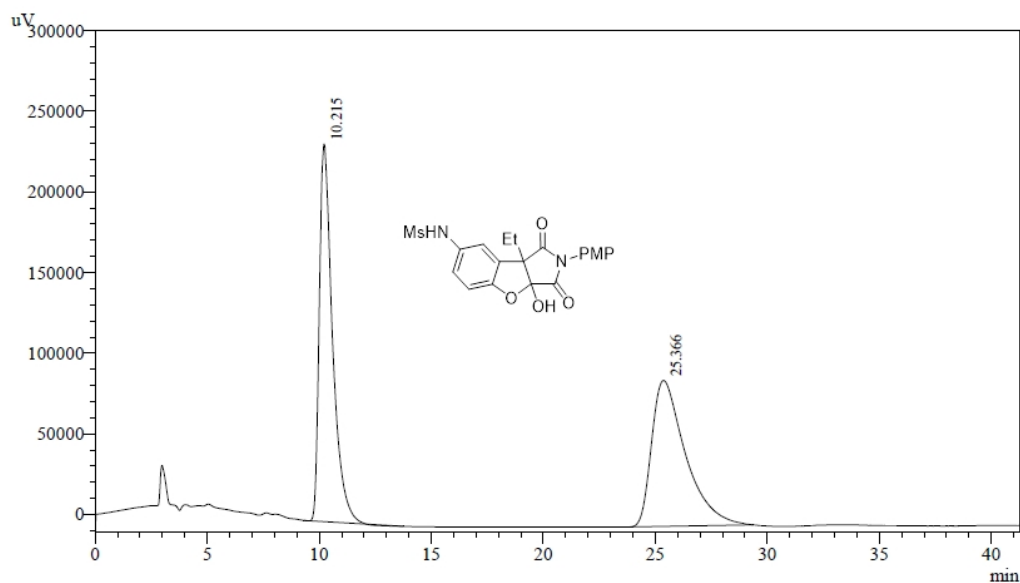

1 Det.A Ch1 / 254nm

Detector A Ch1 254nm

| Peak# | Ret. Time | Area     | Height | Area %  | Height % |
|-------|-----------|----------|--------|---------|----------|
| 1     | 10.215    | 9554748  | 234197 | 50.082  | 72.122   |
| 2     | 25.366    | 9523437  | 90528  | 49.918  | 27.878   |
| Total |           | 19078185 | 324725 | 100.000 | 100.000  |

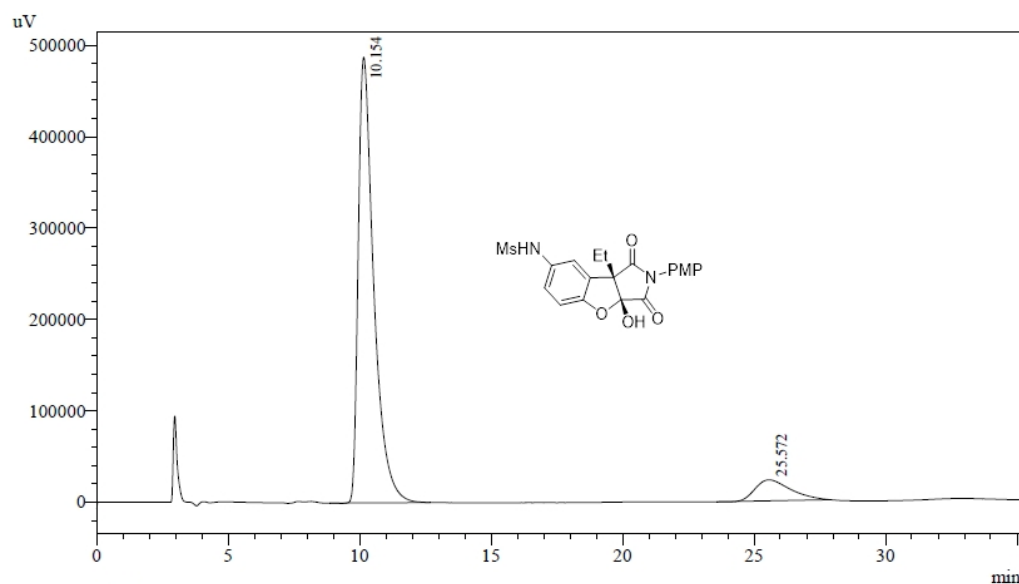

1 Det.A Ch1 / 254nm

Detector A Ch1 254nm

| Peak# | Ret. Time | Area     | Height | Area %  | Height % |
|-------|-----------|----------|--------|---------|----------|
| 1     | 10.154    | 20049834 | 487739 | 90.344  | 95.508   |
| 2     | 25.572    | 2142967  | 22939  | 9.656   | 4.492    |
| Total |           | 22192801 | 510678 | 100.000 | 100.000  |

***N*-((3*aR*,8*bS*)-6-chloro-3*a*-hydroxy-2-(4-methoxyphenyl)-1,3-dioxo-8*b*-phenyl-2,3,3*a*,8*b*-tetrahydro-1*H*-benzofuro[2,3-*c*]pyrrol-7-yl)-4-methylbenzenesulfonamide (3af):**

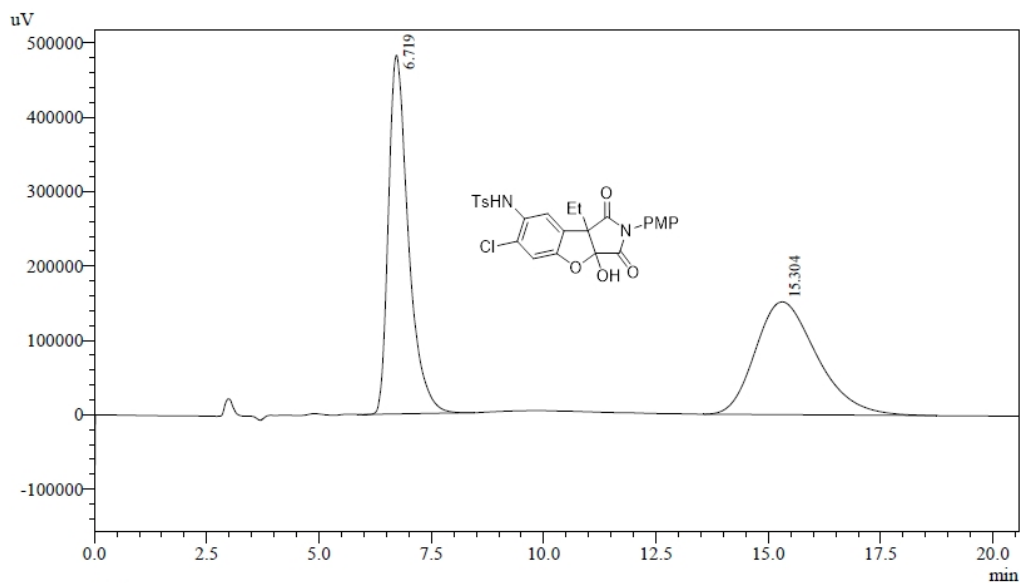

1 Det.A Ch1 / 254nm

Detector A Ch1 254nm

| Peak# | Ret. Time | Area     | Height | Area %  | Height % |
|-------|-----------|----------|--------|---------|----------|
| 1     | 6.719     | 14908720 | 482174 | 50.743  | 76.059   |
| 2     | 15.304    | 14471940 | 151773 | 49.257  | 23.941   |
| Total |           | 29380660 | 633947 | 100.000 | 100.000  |

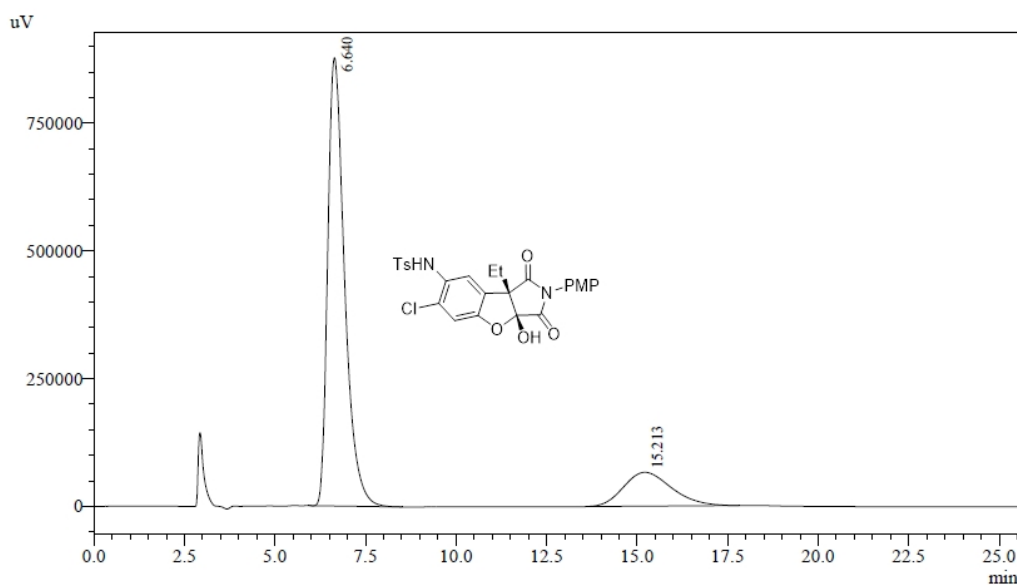

1 Det.A Ch1 / 254nm

Detector A Ch1 254nm

| Peak# | Ret. Time | Area     | Height | Area %  | Height % |
|-------|-----------|----------|--------|---------|----------|
| 1     | 6.640     | 28426218 | 877392 | 82.291  | 92.982   |
| 2     | 15.213    | 6117292  | 66224  | 17.709  | 7.018    |
| Total |           | 34543510 | 943616 | 100.000 | 100.000  |



***N*-((3*aR*,8*bS*)-5-chloro-3*a*-hydroxy-2-(4-methoxyphenyl)-1,3-dioxo-8*b*-phenyl-2,3,3*a*,8*b*-tetrahydro-1*H*-benzofuro[2,3-*c*]pyrrol-7-yl)-4-methylbenzenesulfonamide (3*ag*):**

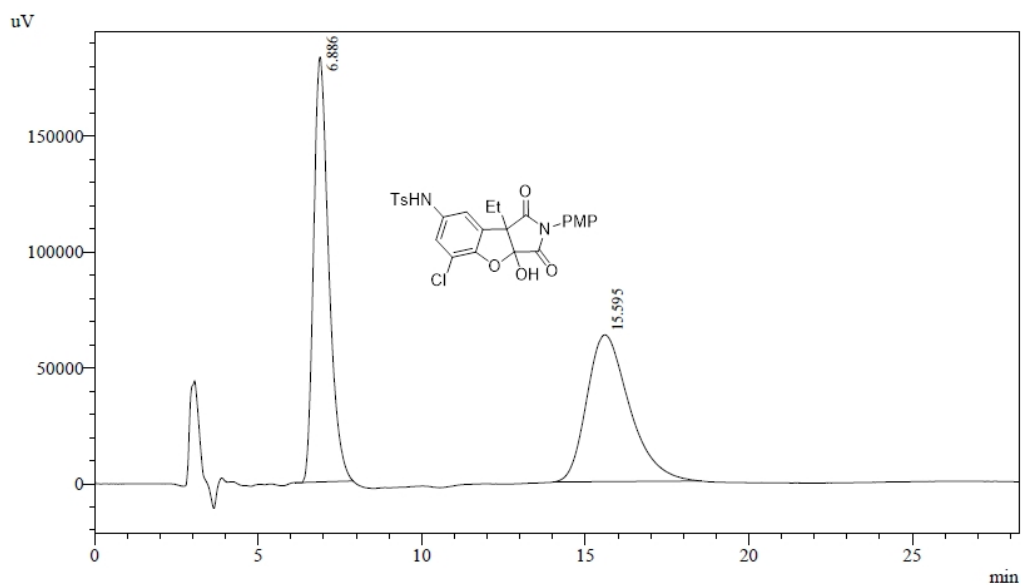

1 Det.A Ch1 / 254nm

Detector A Ch1 254nm

| Peak# | Ret. Time | Area     | Height | Area %  | Height % |
|-------|-----------|----------|--------|---------|----------|
| 1     | 6.886     | 5904086  | 183361 | 50.657  | 74.327   |
| 2     | 15.595    | 5750882  | 63335  | 49.343  | 25.673   |
| Total |           | 11654968 | 246695 | 100.000 | 100.000  |

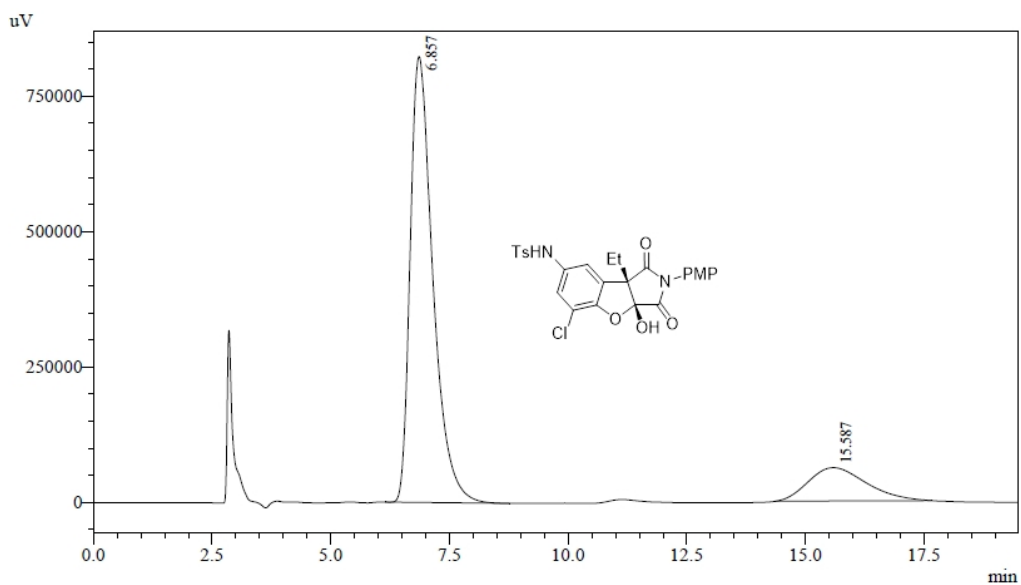

1 Det.A Ch1 / 254nm

Detector A Ch1 254nm

| Peak# | Ret. Time | Area     | Height | Area %  | Height % |
|-------|-----------|----------|--------|---------|----------|
| 1     | 6.857     | 27412930 | 823175 | 83.969  | 93.045   |
| 2     | 15.587    | 5233605  | 61535  | 16.031  | 6.955    |
| Total |           | 32646535 | 884710 | 100.000 | 100.000  |

***N*-((3*aR*,8*bS*)-5-bromo-3*a*-hydroxy-2-(4-methoxyphenyl)-1,3-dioxo-8*b*-phenyl-2,3,3*a*,8*b*-tetrahydro-1*H*-benzofuro[2,3-*c*]pyrrol-7-yl)-4-methylbenzenesulfonamide (3ah):**

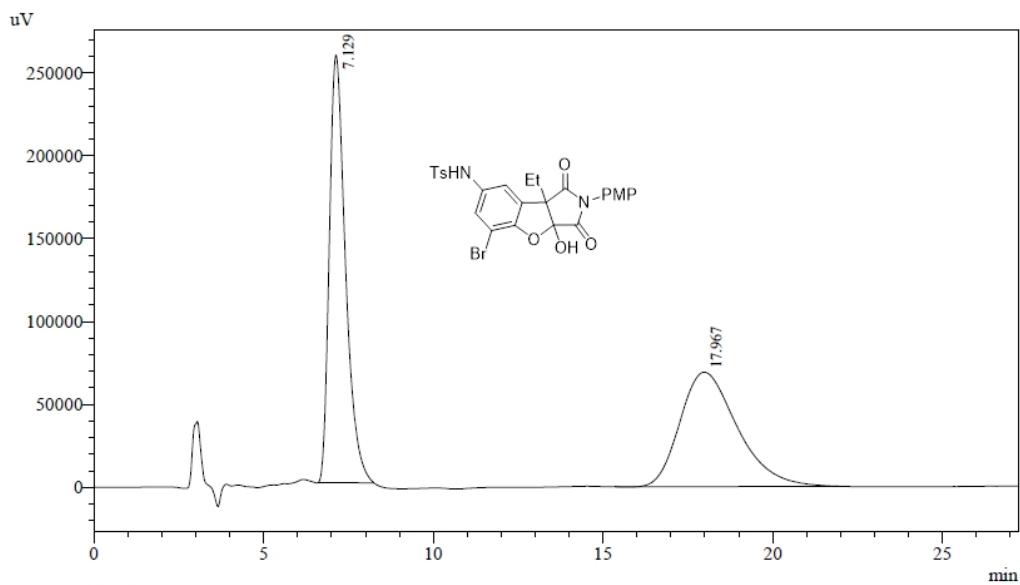

1 Det.A Ch1 / 254nm

Detector A Ch1 254nm

| Peak# | Ret. Time | Area     | Height | Area %  | Height % |
|-------|-----------|----------|--------|---------|----------|
| 1     | 7.129     | 8537480  | 257841 | 51.276  | 78.884   |
| 2     | 17.967    | 8112703  | 69019  | 48.724  | 21.116   |
| Total |           | 16650183 | 326860 | 100.000 | 100.000  |

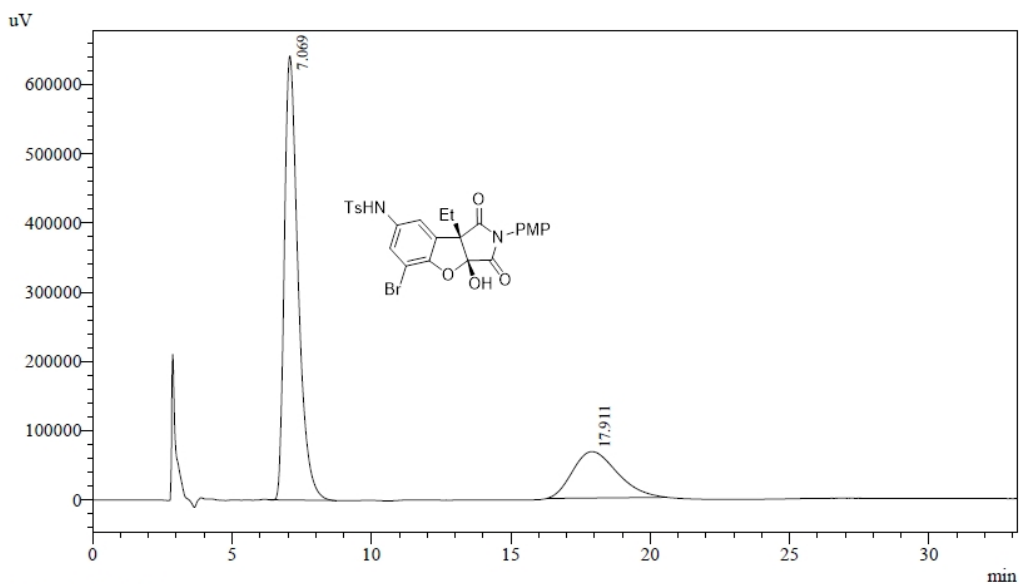

1 Det.A Ch1 / 254nm

Detector A Ch1 254nm

| Peak# | Ret. Time | Area     | Height | Area %  | Height % |
|-------|-----------|----------|--------|---------|----------|
| 1     | 7.069     | 22004061 | 641537 | 74.680  | 90.544   |
| 2     | 17.911    | 7460539  | 66997  | 25.320  | 9.456    |
| Total |           | 29464599 | 708535 | 100.000 | 100.000  |

### 3ah: obtained by bromination of 3aa

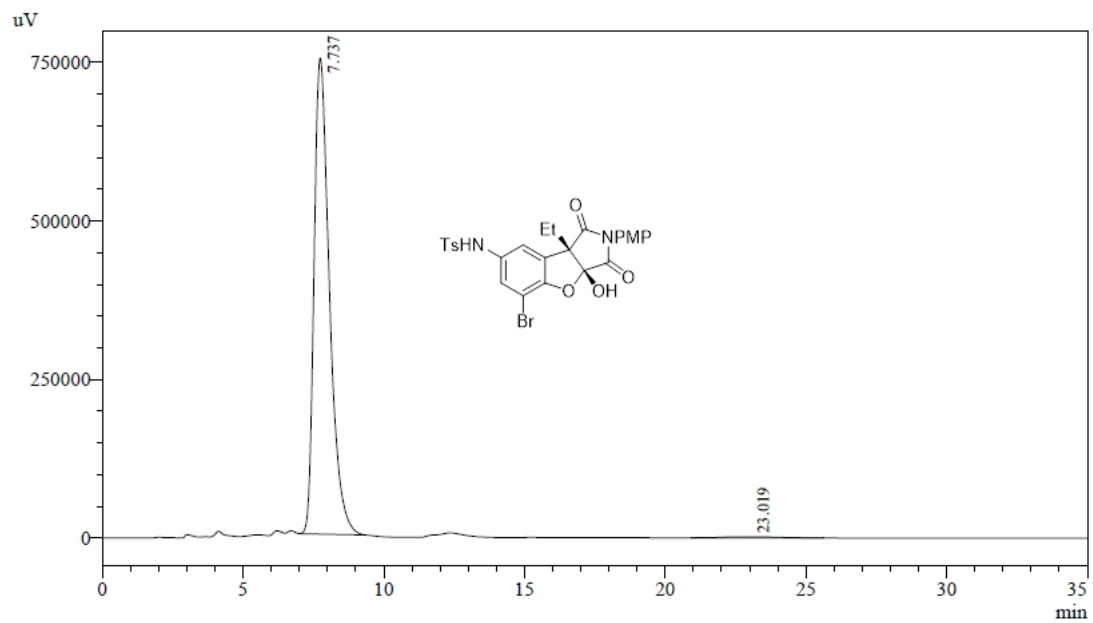

Detector A Ch1 254nm

| Peak# | Ret. Time | Area     | Height | Area %  | Height % |
|-------|-----------|----------|--------|---------|----------|
| 1     | 7.737     | 28532388 | 750663 | 99.122  | 99.754   |
| 2     | 23.019    | 252709   | 1854   | 0.878   | 0.246    |
| Total |           | 28785097 | 752517 | 100.000 | 100.000  |

***N*-((3*aR*,8*bS*)-3*a*-hydroxy-2-(4-methoxyphenyl)-5-methyl-1,3-dioxo-8*b*-phenyl-2,3,3*a*,8*b*-tetrahydro-1*H*-benzofuro[2,3-*c*]pyrrol-7-yl)-4-methylbenzenesulfonamide (3*ai*):**

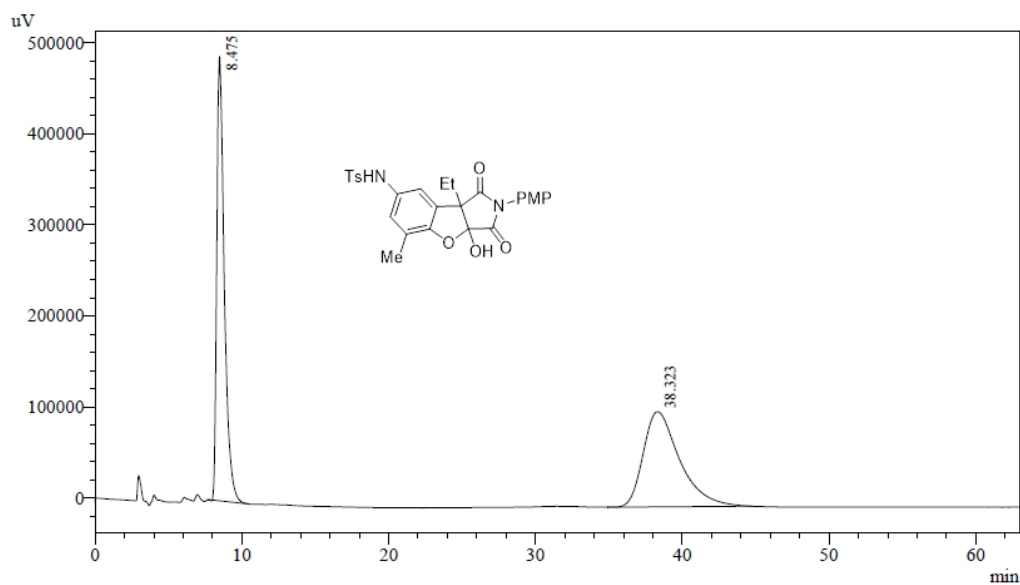

1 Det.A Ch1 / 254nm

Detector A Ch1 254nm

| Peak# | Ret. Time | Area     | Height | Area %  | Height % |
|-------|-----------|----------|--------|---------|----------|
| 1     | 8.475     | 17391460 | 488303 | 49.068  | 82.346   |
| 2     | 38.323    | 18051932 | 104685 | 50.932  | 17.654   |
| Total |           | 35443392 | 592988 | 100.000 | 100.000  |

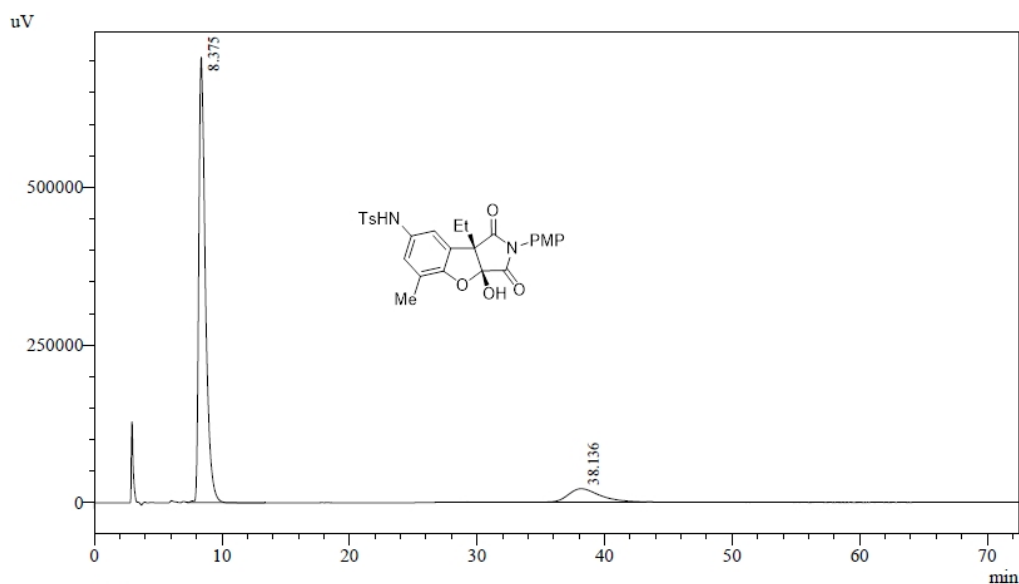

1 Det.A Ch1 / 254nm

Detector A Ch1 254nm

| Peak# | Ret. Time | Area     | Height | Area %  | Height % |
|-------|-----------|----------|--------|---------|----------|
| 1     | 8.375     | 25464977 | 705600 | 87.438  | 97.078   |
| 2     | 38.136    | 3658357  | 21235  | 12.562  | 2.922    |
| Total |           | 29123333 | 726834 | 100.000 | 100.000  |

***N*-((3*R*,8*bS*)-3*a*-hydroxy-5-methoxy-2-(4-methoxyphenyl)-1,3-dioxo-8*b*-phenyl-2,3,3*a*,  
8*b*-tetrahydro-1*H*-benzofuro[2,3-*c*]pyrrol-7-yl)-4-methylbenzenesulfonamide (3*aj*):**

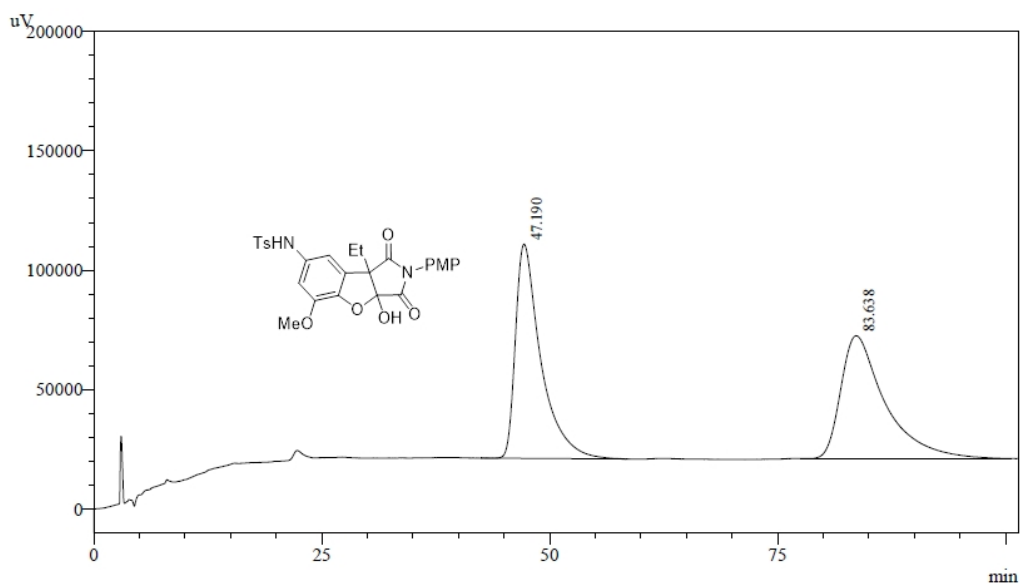

1 Det.A Ch1 / 254nm

Detector A Ch1 254nm

| Peak# | Ret. Time | Area     | Height | Area %  | Height % |
|-------|-----------|----------|--------|---------|----------|
| 1     | 47.190    | 17380704 | 89714  | 49.990  | 63.552   |
| 2     | 83.638    | 17387962 | 51452  | 50.010  | 36.448   |
| Total |           | 34768666 | 141166 | 100.000 | 100.000  |

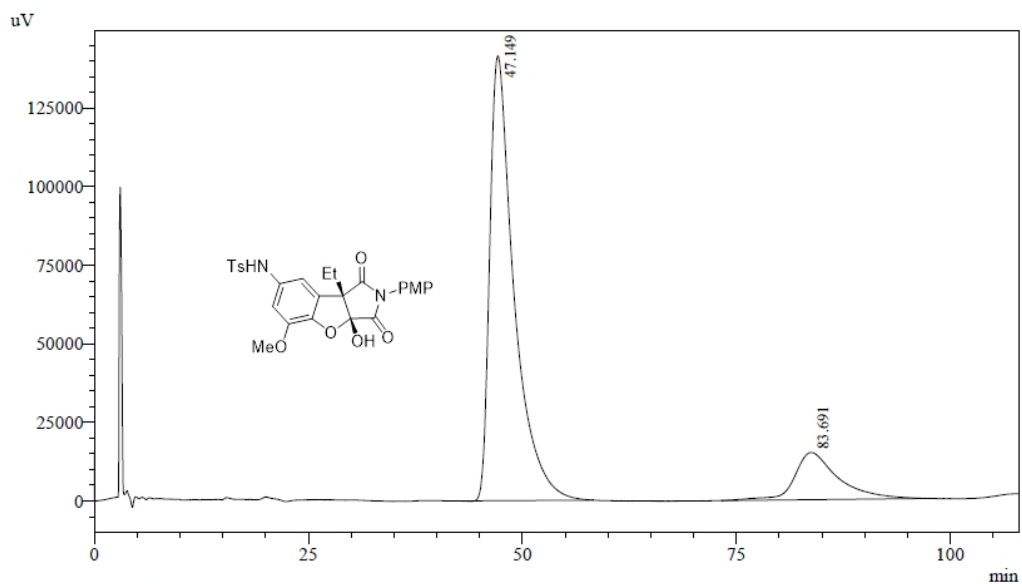

1 Det.A Ch1 / 254nm

Detector A Ch1 254nm

| Peak# | Ret. Time | Area     | Height | Area %  | Height % |
|-------|-----------|----------|--------|---------|----------|
| 1     | 47.149    | 27935390 | 141487 | 84.021  | 90.401   |
| 2     | 83.691    | 5312663  | 15024  | 15.979  | 9.599    |
| Total |           | 33248052 | 156510 | 100.000 | 100.000  |
